# Supplementary material for: Transcriptome-wide sites of collided ribosomes reveal principles of translational pausing
Source: HighWire-hosted journal article supplement (doi:10.1101/gr.257741.119), 2020-07-01
Supplement: Supplemental_Tables_S1-S4.xlsx [file Supplemental_Tables_S1-S4.xlsx]

## Sheet: Supplemental Table S1
Supplemental Table S1: Sequencing and mapping information.
		MONOSOMES						DISOMES
													in counts:
		library	rep	map_type	count			library	rep	map_type	count				Monosome	Disome
	1	Mono00	1	genomic	206030		1	Di00	1	genomic	3765486			genomic	1566347	50364354
	2	Mono02	1	genomic	477189		2	Di02	1	genomic	6028899			rRNA	36649939	862446894
	3	Mono12	1	genomic	218654		3	Di12	1	genomic	14146385			cDNA	109473958	110509329
	4	Mono00	2	genomic	219051		4	Di00	2	genomic	2743828			tRNA	1641929	3989431
	5	Mono02	2	genomic	200121		5	Di02	2	genomic	7473195			mt-tRNA	201305	7262809
	6	Mono12	2	genomic	245302		6	Di12	2	genomic	16206561			unmapped	1179910	24280210
	7	Mono00	1	human_rRNA	102856		7	Di00	1	human_rRNA	1147967
	8	Mono02	1	human_rRNA	1038455		8	Di02	1	human_rRNA	16943929			SUM:	150713388	1058853027
	9	Mono12	1	human_rRNA	45820		9	Di12	1	human_rRNA	9377218
	10	Mono00	2	human_rRNA	161536		10	Di00	2	human_rRNA	1388351
	11	Mono02	2	human_rRNA	114140		11	Di02	2	human_rRNA	18080296		in percentages:
	12	Mono12	2	human_rRNA	46320		12	Di12	2	human_rRNA	7505738				Monosome	Disome
	13	Mono00	1	mouse_cDNA	19236445		13	Di00	1	mouse_cDNA	12606546			genomic	1.03929	4.7565
	14	Mono02	1	mouse_cDNA	23901752		14	Di02	1	mouse_cDNA	16029162			rRNA	24.3176	81.451
	15	Mono12	1	mouse_cDNA	13914934		15	Di12	1	mouse_cDNA	25886024			cDNA	72.6372	10.4367
	16	Mono00	2	mouse_cDNA	20467600		16	Di00	2	mouse_cDNA	12377553			tRNA	1.08944	0.376769
	17	Mono02	2	mouse_cDNA	16574930		17	Di02	2	mouse_cDNA	18824604			mt-tRNA	0.133568	0.685913
	18	Mono12	2	mouse_cDNA	15378297		18	Di12	2	mouse_cDNA	24785440			unmapped	0.782883	2.29307
	19	Mono00	1	mouse_mt-tRNA	37183		19	Di00	1	mouse_mt-tRNA	507327
	20	Mono02	1	mouse_mt-tRNA	34347		20	Di02	1	mouse_mt-tRNA	697338			SUM:	100	100
	21	Mono12	1	mouse_mt-tRNA	35214		21	Di12	1	mouse_mt-tRNA	1603928
	22	Mono00	2	mouse_mt-tRNA	28398		22	Di00	2	mouse_mt-tRNA	396614
	23	Mono02	2	mouse_mt-tRNA	24261		23	Di02	2	mouse_mt-tRNA	1088216
	24	Mono12	2	mouse_mt-tRNA	41902		24	Di12	2	mouse_mt-tRNA	2969386		in percentages, after combining tRNAs:
	25	Mono00	1	mouse_rRNA	4944553		25	Di00	1	mouse_rRNA	179955135				Monosome	Disome
	26	Mono02	1	mouse_rRNA	9524741		26	Di02	1	mouse_rRNA	106511996			unmapped	0.782883	2.29307
	27	Mono12	1	mouse_rRNA	3827213		27	Di12	1	mouse_rRNA	139128447			genomic	1.03929	4.7565
	28	Mono00	2	mouse_rRNA	6995367		28	Di00	2	mouse_rRNA	171786317			tRNA	1.22301	1.06268
	29	Mono02	2	mouse_rRNA	5511406		29	Di02	2	mouse_rRNA	110655740			rRNA	24.3176	81.451
	30	Mono12	2	mouse_rRNA	4337532		30	Di12	2	mouse_rRNA	99965760			cDNA	72.6372	10.4367					<
	31	Mono00	1	mouse_tRNA	154936		31	Di00	1	mouse_tRNA	776713
	32	Mono02	1	mouse_tRNA	523308		32	Di02	1	mouse_tRNA	320689			SUM:	100	100
	33	Mono12	1	mouse_tRNA	202139		33	Di12	1	mouse_tRNA	1299316
	34	Mono00	2	mouse_tRNA	254040		34	Di00	2	mouse_tRNA	210980
	35	Mono02	2	mouse_tRNA	273654		35	Di02	2	mouse_tRNA	326217
	36	Mono12	2	mouse_tRNA	233852		36	Di12	2	mouse_tRNA	1055516
	37	Mono00	1	unmapped	197415		37	Di00	1	unmapped	555971
	38	Mono02	1	unmapped	370981		38	Di02	1	unmapped	3900038
	39	Mono12	1	unmapped	157305		39	Di12	1	unmapped	3185637
	40	Mono00	2	unmapped	138508		40	Di00	2	unmapped	558380
	41	Mono02	2	unmapped	146174		41	Di02	2	unmapped	13330699
	42	Mono12	2	unmapped	169527		42	Di12	2	unmapped	2749485
				SUM:	150713388					SUM:	1058853027

## Sheet: Supplemental Table S2
Supplemental Table S2: Amino acid enrichment at disome site (by dicodon).
dipeptide	codons	present	observed	ratio (observed/present)	global rank (observed/present)	log2_fold enrichment relative to rarest codon usage
GI	GGTATT	641	321	0.50078	1	0.501742
GI	GGAATA	740	364	0.491892	2	0.475906
GI	GGAATT	1318	647	0.490895	3	0.47298
GI	GGAATC	1226	599	0.488581	4	0.466162
GI	GGTATA	278	135	0.485612	5	0.457368
GI	GGTATC	682	328	0.480938	6	0.443417
DI	GATATT	1912	891	0.466004	7	0.830852
DK	GATAAG	2030	910	0.448276	8	2.54004
DI	GATATC	1684	746	0.442993	9	0.757792
DI	GATATA	883	386	0.437146	10	0.738624
GI	GGGATT	1047	456	0.43553	11	0.300337
GI	GGGATC	1265	542	0.428458	12	0.276721
NI	AATATT	1516	627	0.413588	13	0.942775
GD	GGAGAC	3205	1300	0.405616	14	0.809033
GR	GGACGA	475	189	0.397895	15	1.63793
GK	GGAAAG	2635	1025	0.388994	16	2.06124
GI	GGCATT	1867	724	0.387788	17	0.132833
GI	GGGATA	487	185	0.379877	18	0.103097
GR	GGTCGA	371	139	0.374663	19	1.55114
NI	AATATA	667	249	0.373313	20	0.794966
NI	AATATC	1264	470	0.371835	21	0.789243
GD	GGAGAT	2626	959	0.365194	22	0.657582
RE	CGTGAA	713	260	0.364656	23	1.52688
GI	GGCATC	3290	1178	0.358055	24	0.0177451
NK	AATAAG	1776	635	0.357545	25	2.65848
GE	GGAGAG	5158	1826	0.354013	26	0.486478
GI	GGCATA	639	226	0.353678	27	0
GE	GGAGAA	3910	1360	0.347826	28	0.461041
GR	GGAAGG	972	334	0.343621	29	1.42637
GR	GGACGT	298	102	0.342282	30	1.42073
GK	GGGAAG	4036	1371	0.339693	31	1.86572
GD	GGTGAT	1742	585	0.335821	32	0.53661
GE	GGTGAA	2013	675	0.33532	33	0.408215
RD	CGTGAC	711	238	0.33474	34	1.56153
RE	CGTGAG	1055	352	0.333649	35	1.39868
GR	GGACGG	632	207	0.327532	36	1.35718
NE	AATGAG	3930	1287	0.327481	37	0.942736
NP	AATCCA	1366	445	0.325769	38	0.873421
GK	GGTAAG	449	146	0.325167	39	1.80267
GD	GGTGAC	2280	739	0.324123	40	0.485458
NP	AATCCC	1007	325	0.322741	41	0.859949
YI	TATATA	406	131	0.32266	42	1.28543
CI	TGTATA	295	95	0.322034	43	1.20898
NE	AATGAA	4230	1353	0.319858	44	0.908758
GE	GGTGAG	2145	686	0.319814	45	0.339906
YI	TATATT	887	282	0.317926	46	1.2641
GR	GGACGC	433	136	0.314088	47	1.29671
CI	TGTATC	653	205	0.313936	48	1.17224
GR	GGTCGG	437	136	0.311213	49	1.28345
GR	GGGCGA	396	121	0.305556	50	1.25698
GD	GGGGAC	2770	844	0.304693	51	0.396275
NP	AATCCG	256	78	0.304688	52	0.776903
GD	GGGGAT	1685	509	0.302077	53	0.383835
RD	CGTGAT	567	170	0.299824	54	1.4026
AE	GCAGAA	3798	1133	0.298315	55	1.19791
YK	TATAAG	1295	385	0.297297	56	2.9461
GE	GGGGAA	2078	615	0.295958	57	0.228066
ND	AATGAT	2506	738	0.294493	58	0.978285
EI	GAAATC	2456	719	0.292752	59	0.392062
PD	CCTGAT	2504	732	0.292332	60	0.604193
AD	GCGGAT	589	172	0.29202	61	1.28303
GE	GGGGAG	3708	1077	0.290453	62	0.20098
GG	GGAGGA	2407	698	0.289988	63	2.45371
PD	CCTGAC	2814	816	0.289979	64	0.59253
CI	TGTATT	539	156	0.289425	65	1.05496
AE	GCAGAG	5537	1587	0.286617	66	1.1402
NP	AATCCT	1480	424	0.286486	67	0.68804
RE	CGAGAA	1452	414	0.285124	68	1.17193
EI	GAAATT	2632	747	0.283815	69	0.34733
GN	GGAAAT	1803	511	0.283417	70	0.784966
ND	AATGAC	3137	886	0.282435	71	0.917972
AE	GCGGAA	613	173	0.282219	72	1.11789
TI	ACGATT	274	77	0.281022	73	1.62098
DK	GACAAG	5320	1487	0.279511	74	1.85856
GT	GGAACC	1288	360	0.279503	75	1.45329
GK	GGCAAG	3918	1092	0.278714	76	1.58027
AI	GCGATT	280	78	0.278571	77	1.32982
RE	CGAGAG	2050	566	0.276098	78	1.12552
RD	CGAGAC	1299	356	0.274057	79	1.27297
DI	GACATT	2977	809	0.27175	80	0.0527891
YI	TATATC	891	241	0.270483	81	1.03095
GV	GGTGTA	707	191	0.270156	82	1.00661
EI	GAAATA	1625	439	0.270154	83	0.276162
GR	GGGAGG	874	235	0.268879	84	1.0725
GE	GGCGAA	512	137	0.267578	85	0.082635
DN	GATAAC	1372	365	0.266035	86	0.922737
GR	GGTCGT	331	88	0.265861	87	1.05622
DI	GACATC	4535	1198	0.264168	88	0.0119621
DP	GATCCC	1633	431	0.263931	89	0.758863
DD	GATGAC	5634	1482	0.263046	90	0.728816
EK	GAAAAG	5681	1490	0.262278	91	2.10739
GR	GGTCGC	454	119	0.262115	92	1.03574
DI	GACATA	1168	306	0.261986	93	0
AI	GCGATC	264	69	0.261364	94	1.23783
AD	GCAGAT	2938	752	0.255956	95	1.09286
GR	GGGCGC	681	174	0.255507	96	0.998907
DW	GATTGG	671	171	0.254844	97	0.488581
DN	GATAAT	1433	365	0.25471	98	0.859979
PD	CCCGAT	634	161	0.253943	99	0.401089
GE	GGCGAG	1864	471	0.252682	100	0
GL	GGTCTT	843	213	0.252669	101	1.46447
TI	ACGATC	337	85	0.252226	102	1.46501
RD	CGAGAT	1108	279	0.251805	103	1.1508
NR	AATCGG	430	108	0.251163	104	1.95005
EW	GAATGG	1294	325	0.251159	105	0.30447
DM	GATATG	1512	379	0.250661	106	0.842388
PD	CCAGAT	2956	739	0.25	107	0.378512
GR	GGCCGA	969	242	0.249742	108	0.965984
GV	GGAGTC	1354	338	0.249631	109	0.892619
AI	GCAATT	939	234	0.249201	110	1.16908
AD	GCAGAC	2732	676	0.247438	111	1.04403
GN	GGAAAC	1820	450	0.247253	112	0.588029
GV	GGAGTA	737	182	0.246947	113	0.877025
DP	GATCCA	1606	396	0.246575	114	0.660728
GV	GGTGTT	1248	307	0.245994	115	0.871444
NI	AACATT	2297	563	0.245102	116	0.187963
GT	GGGACC	1536	376	0.244792	117	1.26198
EI	GAGATT	2798	684	0.24446	118	0.131981
GR	GGGCGG	672	164	0.244048	119	0.932709
DD	GATGAT	4778	1166	0.244035	120	0.620591
GN	GGTAAT	440	107	0.243182	121	0.564078
WP	TGGCCT	725	176	0.242759	122	0.132616
YN	TATAAT	910	220	0.241758	123	1.14693
GD	GGCGAC	903	218	0.241417	124	0.0604479
GR	GGGCGT	336	81	0.241071	125	0.915007
GN	GGGAAT	1210	290	0.239669	126	0.543088
WP	TGGCCA	715	171	0.239161	127	0.111074
GV	GGTGTC	1575	376	0.23873	128	0.828204
WP	TGGCCG	206	49	0.237864	129	0.10323
DR	GATAGG	492	117	0.237805	130	1.60123
GR	GGTAGG	181	43	0.237569	131	0.893893
YG	TATGGG	1335	317	0.237453	132	2.47826
PG	CCTGGA	2962	701	0.236664	133	1.75575
YG	TATGGA	1763	417	0.236529	134	2.47263
DR	GATCGG	652	154	0.236196	135	1.59144
AE	GCGGAG	1612	379	0.235112	136	0.85442
TP	ACGCCT	570	134	0.235088	137	1.34167
GT	GGAACG	383	90	0.234987	138	1.20301
AK	GCGAAG	590	138	0.233898	139	2.45632
GP	GGACCG	330	77	0.233333	140	1.37364
YD	TATGAT	2210	514	0.232579	141	1.02767
DR	GATCGA	598	139	0.232441	142	1.56832
GN	GGTAAC	565	131	0.231858	143	0.495287
GD	GGCGAT	622	144	0.231511	144	0
EI	GAGATC	4345	1001	0.23038	145	0.046395
TI	ACGATA	161	37	0.229814	146	1.33076
TK	ACGAAG	623	143	0.229535	147	2.46007
DG	GATGGA	3464	794	0.229215	148	1.96993
YE	TATGAG	3373	773	0.229173	149	1.24874
GG	GGAGGG	1557	356	0.228645	150	2.11083
PD	CCGGAT	678	154	0.227139	151	0.240157
GG	GGTGGA	1688	383	0.226896	152	2.09975
CK	TGTAAG	1274	289	0.226845	153	2.73698
GT	GGTACC	848	192	0.226415	154	1.1494
GG	GGGGGA	933	211	0.226152	155	2.09502
GR	GGCCGG	1430	323	0.225874	156	0.821065
GT	GGAACT	1183	267	0.225697	157	1.14482
DP	GATCCT	1993	448	0.224787	158	0.527257
GV	GGAGTT	1217	273	0.224322	159	0.738395
AI	GCAATC	733	164	0.223738	160	1.01358
EI	GAGATA	1282	286	0.223089	161	0
PD	CCAGAC	2841	630	0.221753	162	0.205537
WP	TGGCCC	709	157	0.221439	163	0
YN	TATAAC	944	209	0.221398	164	1.02001
YD	TATGAC	2763	609	0.220413	165	0.950159
GT	GGAACA	1470	324	0.220408	166	1.1106
NR	AATAGG	396	87	0.219697	167	1.75694
GT	GGGACG	425	93	0.218824	168	1.10019
VI	GTTATT	887	194	0.218715	169	1.36277
TD	ACGGAT	692	151	0.218208	170	0.854403
NI	AACATA	1004	219	0.218127	171	0.0197506
PI	CCGATC	248	54	0.217742	172	1.44839
GP	GGACCA	1314	286	0.217656	173	1.27329
GT	GGGACT	1135	247	0.217621	174	1.09225
RE	CGCGAG	682	148	0.217009	175	0.778098
CD	TGTGAT	1827	396	0.216749	176	0.877379
GS	GGATCC	872	189	0.216743	177	1.78972
GP	GGACCC	1415	306	0.216254	178	1.26397
NI	AACATC	3588	772	0.215162	179	0
RE	CGCGAA	163	35	0.214724	180	0.762827
TP	ACGCCC	652	140	0.214724	181	1.21095
PD	CCGGAC	839	179	0.213349	182	0.1498
GL	GGACTC	1085	231	0.212903	183	1.21742
RS	CGTTCG	80	17	0.2125	184	2.63748
GL	GGACTT	1045	222	0.21244	185	1.21428
AI	GCAATA	570	121	0.212281	186	0.937744
DR	GATCGC	500	106	0.212	187	1.43551
GT	GGTACT	576	122	0.211806	188	1.05317
AN	GCGAAT	227	48	0.211454	189	1.50089
YE	TATGAA	3459	731	0.211333	190	1.13183
FG	TTTGGA	2850	602	0.211228	191	1.63134
YS	TATTCG	166	35	0.210843	192	2.39938
PI	CCGATT	223	47	0.210762	193	1.40139
GV	GGGGTA	461	97	0.210412	194	0.646041
GQ	GGACAG	2456	516	0.210098	195	1.33409
DP	GATCCG	378	79	0.208995	196	0.422166
DY	GATTAC	1271	265	0.208497	197	0.489127
TP	ACGCCA	529	110	0.20794	198	1.16463
NP	AACCCC	2097	435	0.207439	199	0.222261
GS	GGATCG	232	48	0.206897	200	1.72264
GM	GGAATG	1513	313	0.206874	201	0.739998
ED	GAAGAC	5743	1187	0.206686	202	0.645018
EK	GAGAAG	11605	2390	0.205946	203	1.75856
GW	GGATGG	612	126	0.205882	204	0.640756
RD	CGCGAT	214	44	0.205607	205	0.858383
AS	GCGTCT	502	103	0.205179	206	2.32511
AK	GCAAAG	2317	475	0.205006	207	2.2661
GV	GGGGTC	1143	234	0.204724	208	0.606507
NR	AATCGC	396	81	0.204545	209	1.65385
TD	ACGGAC	856	175	0.204439	210	0.76037
DY	GATTAT	1478	302	0.20433	211	0.460001
GS	GGATCT	1004	205	0.204183	212	1.7036
AG	GCAGGA	1978	403	0.203741	213	2.63352
DH	GATCAC	1105	225	0.20362	214	1.67873
EW	GAGTGG	2075	422	0.203373	215	0
NK	AACAAG	4025	817	0.202981	216	1.8417
DL	GATCTT	1529	310	0.202747	217	1.43004
NS	AATTCG	173	35	0.202312	218	1.95407
GL	GGTCTC	970	195	0.201031	219	1.13464
GP	GGTCCA	891	179	0.200898	220	1.15771
DG	GATGGG	3052	613	0.200852	221	1.77936
CI	TGCATT	987	198	0.200608	222	0.526147
GV	GGGGTT	709	142	0.200282	223	0.574857
GP	GGTCCG	210	42	0.2	224	1.15124
NP	AACCCG	580	116	0.2	225	0.169573
RS	CGTTCT	493	98	0.198783	226	2.54121
CP	TGTCCA	805	160	0.198758	227	1.0165
DS	GATTCG	322	64	0.198758	228	1.80999
CP	TGTCCG	207	41	0.198068	229	1.01148
NL	AATCTT	1162	230	0.197935	230	2.28988
RE	CGGGAG	2938	581	0.197754	231	0.644048
GN	GGGAAC	1746	344	0.197022	232	0.260398
DE	GATGAA	6617	1301	0.196615	233	0.577013
TP	ACGCCG	290	57	0.196552	234	1.08338
NR	AATCGA	382	75	0.196335	235	1.59474
EN	GAAAAT	3754	736	0.196058	236	0.500879
AI	GCGATA	97	19	0.195876	237	0.821714
GL	GGGCTT	890	174	0.195506	238	1.09443
RS	CGATCT	379	74	0.195251	239	2.51534
GV	GGAGTG	1916	374	0.195198	240	0.537764
GP	GGACCT	1358	265	0.19514	241	1.11575
RS	CGATCC	349	68	0.194842	242	2.51232
GG	GGGGGG	391	76	0.194373	243	1.87655
GL	GGTTTA	448	87	0.194196	244	1.08474
GV	GGTGTG	2494	484	0.194066	245	0.529369
GL	GGTCTA	366	71	0.193989	246	1.0832
GL	GGACTG	1770	343	0.193785	247	1.08168
VK	GTTAAG	839	162	0.193087	248	2.16515
GR	GGAAGA	1423	274	0.192551	249	0.590786
TW	ACGTGG	504	97	0.19246	250	1.42686
NN	AATAAT	1268	244	0.192429	251	1.15679
PD	CCCGAC	988	190	0.192308	252	0
RE	CGGGAA	1662	319	0.191937	253	0.60098
PG	CCCGGA	590	113	0.191525	254	1.45044
DE	GATGAG	7152	1368	0.191275	255	0.537291
ED	GAAGAT	6427	1228	0.191069	256	0.531668
CI	TGCATC	1551	295	0.1902	257	0.449285
PG	CCAGGA	2658	505	0.189992	258	1.43885
CE	TGTGAA	2569	488	0.189957	259	0.960347
DS	GATTCC	1477	280	0.189573	260	1.74174
ND	AACGAT	682	129	0.18915	261	0.339578
VI	GTTATA	423	80	0.189125	262	1.15306
GR	GGCAGG	1264	239	0.189082	263	0.56456
GL	GGGCTC	1439	272	0.18902	264	1.04576
DR	GATCGT	413	78	0.188862	265	1.26878
GT	GGGACA	1422	268	0.188467	266	0.884738
PN	CCGAAT	276	52	0.188406	267	1.08761
VK	GTGAAG	5542	1044	0.18838	268	2.12954
CD	TGTGAC	2721	512	0.188166	269	0.673362
RI	CGTATC	287	54	0.188153	270	2.02648
GG	GGCGGA	506	95	0.187747	271	1.82651
AD	GCGGAC	795	149	0.187421	272	0.643251
TI	ACAATT	892	167	0.18722	273	1.03503
FI	TTTATT	1250	234	0.1872	274	0.736458
GS	GGTTCC	995	186	0.186935	275	1.57627
GR	GGGAGA	899	168	0.186874	276	0.547614
VI	GTTATC	814	152	0.186732	277	1.13469
RG	CGTGGA	533	99	0.185741	278	2.3646
TK	ACAAAG	1879	349	0.185737	279	2.15463
TI	ACAATC	728	135	0.18544	280	1.02125
DL	GATCTC	1559	289	0.185375	281	1.30081
EN	GAAAAC	3234	599	0.18522	282	0.418839
PG	CCTGGG	2689	498	0.185199	283	1.40198
ER	GAACGA	874	161	0.184211	284	1.35397
GW	GGTTGG	402	74	0.18408	285	0.479265
QI	CAGATT	2532	465	0.183649	286	0.507578
GG	GGTGGG	1507	276	0.183145	287	1.79071
VK	GTCAAG	2681	491	0.183141	288	2.08885
AS	GCATCT	1513	277	0.18308	289	2.1607
YS	TATTCC	825	151	0.18303	290	2.19529
NE	AACGAG	1695	309	0.182301	291	0.0976471
TI	ACAATA	544	99	0.181985	292	0.994121
RI	CGTATT	242	44	0.181818	293	1.97707
DW	GACTGG	2461	447	0.181633	294	0
RD	CGGGAC	1707	310	0.181605	295	0.679295
GL	GGACTA	558	101	0.181004	296	0.983239
AG	GCGGGA	431	78	0.180974	297	2.46257
GM	GGGATG	1575	285	0.180952	298	0.546857
GN	GGCAAT	1433	258	0.180042	299	0.130375
NP	AACCCA	2005	360	0.179551	300	0.0139673
GL	GGTCTG	1488	267	0.179435	301	0.970686
RD	CGGGAT	1155	207	0.179221	302	0.660228
GP	GGGCCC	1711	306	0.178843	303	0.989935
QI	CAAATT	845	151	0.178698	304	0.46815
WI	TGGATC	1148	205	0.178571	305	0.733742
QP	CAGCCG	1154	206	0.17851	306	0.562603
EP	GAACCT	1728	308	0.178241	307	0.580774
NS	AATTCC	1117	199	0.178156	308	1.77063
NP	AACCCT	2047	364	0.177821	309	0
EP	GAACCC	1493	264	0.176825	310	0.56927
FG	TTTGGG	2130	376	0.176526	311	1.37242
GP	GGTCCC	1191	210	0.176322	312	0.969459
TD	ACCGAT	505	89	0.176238	313	0.54622
AR	GCGCGA	125	22	0.176	314	2.10541
AS	GCATCC	1290	227	0.175969	315	2.10354
GV	GGGGTG	1512	266	0.175926	316	0.387792
VI	GTCATT	2034	357	0.175516	317	1.04532
GQ	GGTCAG	1456	255	0.175137	318	1.07152
FI	TTTATA	551	96	0.174229	319	0.632859
ER	GAACGC	782	136	0.173913	320	1.27098
RD	CGCGAC	398	69	0.173367	321	0.612318
GL	GGTTTG	825	143	0.173333	322	0.92077
PI	CCAATT	785	136	0.173248	323	1.11861
NA	AATGCA	2115	365	0.172577	324	1.50484
GR	GGCCGC	1670	288	0.172455	325	0.431767
GQ	GGTCAA	638	110	0.172414	326	1.04891
GV	GGCGTA	174	30	0.172414	327	0.358699
EP	GAACCA	1657	285	0.171998	328	0.529335
NN	AATAAC	1227	211	0.171964	329	0.994567
GR	GGCCGT	705	121	0.171631	330	0.424858
PE	CCTGAA	3292	564	0.171324	331	0.786999
AE	GCTGAA	3544	606	0.170993	332	0.395013
RI	CGAATT	604	103	0.17053	333	1.88459
NG	AATGGA	2740	467	0.170438	334	1.58929
NE	AACGAA	810	138	0.17037	335	0
QI	CAGATC	3624	617	0.170254	336	0.398312
NH	AATCAC	852	144	0.169014	337	1.44741
DL	GATCTA	734	124	0.168937	338	1.16685
TP	ACACCG	450	76	0.168889	339	0.864542
WI	TGGATT	949	160	0.168599	340	0.650832
AS	GCGTCA	297	50	0.16835	341	2.03969
FG	TTCGGA	398	67	0.168342	342	1.30393
GL	GGATTA	529	89	0.168242	343	0.877758
RS	CGTTCC	506	85	0.167984	344	2.29834
RP	CGACCG	137	23	0.167883	345	2.37306
TP	ACACCT	1519	255	0.167874	346	0.855843
CN	TGTAAT	974	163	0.167351	347	1.09881
RN	CGAAAT	563	94	0.166963	348	1.76809
FI	TTTATC	1038	173	0.166667	349	0.568843
TD	ACAGAT	2859	476	0.166492	350	0.464149
ES	GAATCC	1269	211	0.166273	351	1.49268
GH	GGTCAC	813	135	0.166052	352	1.69875
RN	CGTAAT	187	31	0.165775	353	1.7578
GT	GGTACA	641	106	0.165367	354	0.696095
CE	TGTGAG	2951	487	0.165029	355	0.75739
AI	GCTATT	1146	189	0.164921	356	0.57355
ER	GAACGG	1110	183	0.164865	357	1.1939
QI	CAAATC	880	145	0.164773	358	0.351102
QP	CAGCCC	3391	558	0.164553	359	0.445156
GN	GGCAAC	2292	377	0.164485	360	0
AE	GCTGAG	5342	875	0.163796	361	0.332977
GL	GGATTG	733	120	0.163711	362	0.83837
GT	GGCACC	2577	421	0.163368	363	0.678555
NM	AATATG	1206	197	0.16335	364	1.11384
GS	GGTTCG	141	23	0.163121	365	1.37967
SI	AGTATA	374	61	0.163102	366	1.07661
CP	TGTCCC	932	152	0.16309	367	0.731154
DP	GACCCC	2910	474	0.162887	368	0.0625674
QP	CAGCCT	3538	576	0.162804	369	0.429737
YW	TATTGG	370	60	0.162162	370	0.580978
CP	TGTCCT	978	157	0.160532	371	0.708343
NR	AATCGT	293	47	0.16041	372	1.30318
GM	GGTATG	524	84	0.160305	373	0.37207
EN	GAGAAT	3458	554	0.160208	374	0.20955
GT	GGTACG	100	16	0.16	375	0.648499
NS	AATTCT	1400	224	0.16	376	1.61556
DP	GACCCA	2494	399	0.159984	377	0.0366268
PI	CCTATT	783	125	0.159642	378	1.00061
QP	CAGCCA	3284	524	0.159562	379	0.400714
AT	GCGACT	232	37	0.159483	380	2.22184
DD	GACGAT	1282	204	0.159126	381	0.00367478
DP	GACCCT	2854	454	0.159075	382	0.0284065
GS	GGATCA	711	113	0.158931	383	1.34214
DD	GACGAC	1846	293	0.158722	384	0
GR	GGTAGA	328	52	0.158537	385	0.310362
TD	ACAGAC	2889	458	0.158532	386	0.393475
WK	TGGAAG	2312	366	0.158304	387	1.31717
NY	AATTAC	1087	172	0.158234	388	0.692547
DL	GATCTG	2575	407	0.158058	389	1.07081
TI	ACTATT	792	125	0.157828	390	0.788655
GS	GGTTCT	1137	179	0.157432	391	1.32846
GH	GGACAC	1182	186	0.15736	392	1.62119
RI	CGTATA	89	14	0.157303	393	1.76812
VI	GTAATT	547	86	0.157221	394	0.886515
QI	CAGATA	1311	206	0.157132	395	0.282601
AN	GCAAAT	1372	214	0.155977	396	1.06187
DP	GACCCG	904	141	0.155973	397	0
SI	TCGATC	135	21	0.155556	398	1.00827
ES	GAATCT	1563	243	0.15547	399	1.39577
PE	CCTGAG	5056	786	0.155459	400	0.646801
PI	CCTATC	779	121	0.155327	401	0.961082
WD	TGGGAT	1491	231	0.15493	402	0.328673
DA	GATGCC	4025	623	0.154783	403	1.26948
DS	GATTCT	1913	296	0.154731	404	1.44874
AR	GCACGA	349	54	0.154728	405	1.91957
NL	AATCTC	1185	183	0.15443	406	1.93181
ER	GAAAGG	1900	293	0.154211	407	1.09752
YK	TACAAG	3205	494	0.154134	408	1.99838
GS	GGGTCT	954	147	0.154088	409	1.29749
SI	TCTATC	715	110	0.153846	410	0.992326
NR	AACCGG	1138	175	0.153779	411	1.24228
RN	CGAAAC	593	91	0.153457	412	1.6464
GL	GGGTTG	626	96	0.153355	413	0.744092
DH	GATCAT	973	149	0.153135	414	1.26766
SI	AGTATT	824	126	0.152913	415	0.983545
AP	GCACCT	1323	202	0.152683	416	1.96995
GS	GGGTCG	223	34	0.152466	417	1.28223
TT	ACGACT	243	37	0.152263	418	2.11119
AS	GCATCG	316	48	0.151899	419	1.89133
YI	TACATT	1507	228	0.151294	420	0.192766
GP	GGTCCT	1390	210	0.151079	421	0.746548
DY	GACTAT	2053	310	0.150999	422	0.0236328
AR	GCACGG	644	97	0.150621	423	1.88076
GL	GGGCTA	559	84	0.150268	424	0.714762
VK	GTAAAG	1339	201	0.150112	425	1.80194
NW	AATTGG	493	74	0.150101	426	0.48668
YG	TACGGA	480	72	0.15	427	1.81558
VI	GTGATC	2115	317	0.149882	428	0.817544
AT	GCGACA	247	37	0.149798	429	2.13145
CG	TGTGGA	1732	259	0.149538	430	2.13007
TN	ACGAAT	214	32	0.149533	431	1.55024
ND	AACGAC	1057	158	0.14948	432	0
GC	GGTTGT	422	63	0.149289	433	1.14289
EY	GAATAT	1795	267	0.148747	434	0.200069
DY	GACTAC	2612	388	0.148545	435	0
TN	ACGAAC	303	45	0.148515	436	1.54038
EP	GAACCG	384	57	0.148438	437	0.316802
AE	GCCGAA	681	101	0.148311	438	0.189702
DR	GACCGG	1598	237	0.14831	439	0.92007
GQ	GGACAA	1138	168	0.147627	440	0.824995
TS	ACGTCG	156	23	0.147436	441	3.12386
GS	GGGTCC	944	139	0.147246	442	1.23196
RG	CGTGGG	619	91	0.147011	443	2.02723
VW	GTTTGG	517	76	0.147002	444	0.62897
DN	GACAAT	2229	327	0.146703	445	0.0640151
DA	GATGCA	2673	391	0.146278	446	1.18794
SI	TCTATA	424	62	0.146226	447	0.919042
NR	AACCGA	818	119	0.145477	448	1.16221
YM	TATATG	674	98	0.145401	449	1.18295
RS	CGTAGT	172	25	0.145349	450	2.08954
EP	GAGCCG	1150	167	0.145217	451	0.285161
SR	TCGCGA	62	9	0.145161	452	2.74971
DR	GACCGA	1131	164	0.145004	453	0.887547
PG	CCGGGA	552	80	0.144928	454	1.04824
AD	GCTGAT	2692	390	0.144874	455	0.271761
EL	GAACTT	2177	315	0.144695	456	0.987549
GS	GGCTCC	3024	437	0.144511	457	1.20491
TR	ACGCGA	97	14	0.14433	458	2.19766
RE	AGGGAG	2238	323	0.144325	459	0.189668
AS	GCGTCC	562	81	0.144128	460	1.81557
GL	GGGCTG	2922	420	0.143737	461	0.650654
VI	GTCATC	3476	498	0.143268	462	0.752436
GY	GGATAC	685	98	0.143066	463	0.773257
GV	GGCGTC	757	108	0.142668	464	0.0854895
DS	GATTCA	1185	169	0.142616	465	1.33112
VI	GTGATT	1677	239	0.142516	466	0.744847
DT	GATACC	1095	156	0.142466	467	1.61611
GW	GGGTGG	443	63	0.142212	468	0.106981
DE	GACGAA	1076	153	0.142193	469	0.109495
AD	GCTGAC	3392	482	0.142099	470	0.243863
DR	GATAGA	746	106	0.142091	471	0.858267
AW	GCGTGG	359	51	0.142061	472	0.691323
AN	GCAAAC	1149	163	0.141862	473	0.925036
YG	TATGGC	1765	250	0.141643	474	1.73287
AD	GCCGAT	643	91	0.141524	475	0.238013
TE	ACGGAA	855	121	0.14152	476	1.1375
SD	TCGGAT	636	90	0.141509	477	0.837663
EH	GAACAC	1689	239	0.141504	478	1.19399
TD	ACTGAC	2054	290	0.141188	479	0.226315
TP	ACACCA	1743	246	0.141136	480	0.605553
FP	TTTCCG	234	33	0.141026	481	0.935686
GA	GGAGCA	1911	269	0.140764	482	1.57189
DV	GATGTA	1499	211	0.140761	483	0.858792
AI	GCCATA	924	130	0.140693	484	0.344318
EE	GAAGAA	9494	1335	0.140615	485	0.818331
GC	GGTTGC	356	50	0.140449	486	1.05484
AP	GCACCG	413	58	0.140436	487	1.84931
DN	GACAAC	3399	477	0.140335	488	0
GQ	GGGCAG	2645	371	0.140265	489	0.751186
GT	GGCACT	1590	223	0.140252	490	0.458444
PE	CCCGAA	656	92	0.140244	491	0.498206
VI	GTGATA	750	105	0.14	492	0.719146
PG	CCAGGG	2058	288	0.139942	493	0.997733
PI	CCTATA	379	53	0.139842	494	0.809565
DM	GACATG	3877	542	0.139799	495	0
ER	GAACGT	552	77	0.139493	496	0.952807
PE	CCAGAG	5136	716	0.139408	497	0.489583
CI	TGCATA	402	56	0.139303	498	0
TE	ACGGAG	1555	216	0.138907	499	1.11061
EN	GAGAAC	4742	657	0.138549	500	0
NG	AATGGG	2122	294	0.138549	501	1.29043
PK	CCGAAG	657	91	0.138508	502	1.09717
DL	GATTTG	1632	226	0.13848	503	0.88004
VP	GTACCG	152	21	0.138158	504	0.747454
QP	CAACCG	181	25	0.138122	505	0.19254
SD	TCCGAT	486	67	0.13786	506	0.79997
TI	ACTATA	392	54	0.137755	507	0.592405
GH	GGTCAT	726	100	0.137741	508	1.42908
RI	CGCATT	574	79	0.137631	509	1.57537
VD	GTTGAC	1359	187	0.137601	510	0.410882
AW	GCATGG	553	76	0.137432	511	0.643529
FG	TTCGGG	584	80	0.136986	512	1.00657
RI	CGAATC	628	86	0.136943	513	1.56814
QD	CAGGAT	3460	473	0.136705	514	0.100922
GV	GGCGTT	417	57	0.136691	515	0.023738
EP	GAGCCT	3167	432	0.136407	516	0.194861
VP	GTTCCG	242	33	0.136364	517	0.728595
EY	GAGTAT	1966	268	0.136317	518	0.0741827
GP	GGGCCT	1570	214	0.136306	519	0.59809
SI	TCCATT	1578	215	0.136248	520	0.817077
TD	ACTGAT	1742	237	0.136051	521	0.17284
RD	AGAGAC	2067	281	0.135946	522	0.261522
ES	GAATCG	309	42	0.135922	523	1.20191
VP	GTACCC	686	93	0.135569	524	0.720158
RI	CGGATT	679	92	0.135493	525	1.55279
PN	CCTAAC	901	122	0.135405	526	0.611049
GL	GGCCTC	2319	314	0.135403	527	0.564482
DC	GATTGC	554	75	0.135379	528	0.874632
ED	GAGGAC	6146	832	0.135373	529	0.0345105
EY	GAATAC	1530	207	0.135294	530	0.0633121
GC	GGATGC	451	61	0.135255	531	1.00047
AR	GCACGC	407	55	0.135135	532	1.72424
GG	GGAGGC	2487	336	0.135103	533	1.35178
AP	GCACCA	1266	171	0.135071	534	1.79312
AG	GCAGGG	1719	232	0.134962	535	2.03934
CP	TGCCCC	1038	140	0.134875	536	0.457105
DV	GATGTT	2457	331	0.134717	537	0.795483
DA	GATGCG	750	101	0.134667	538	1.06862
GV	GGCGTG	1361	183	0.13446	539	0
YR	TATCGA	357	48	0.134454	540	1.8979
GS	GGCTCT	2395	322	0.134447	541	1.10077
FP	TTTCCC	967	130	0.134436	542	0.866652
DV	GATGTC	2960	397	0.134122	543	0.789091
YS	TATTCT	895	120	0.134078	544	1.74628
EA	GAAGCA	3404	456	0.13396	545	0.915656
YT	TATACC	695	93	0.133813	546	1.84524
NL	AATCTG	1626	217	0.133456	547	1.72122
GT	GGCACA	1762	235	0.133371	548	0.385874
DG	GACGGA	758	101	0.133245	549	1.18731
FK	TTTAAG	1772	236	0.133183	550	1.55754
TP	ACTCCA	1834	244	0.133043	551	0.520355
EP	GAGCCC	3578	476	0.133035	552	0.158755
QP	CAACCA	880	117	0.132955	553	0.137535
AG	GCGGGG	647	86	0.132921	554	2.01735
YR	TATAGG	316	42	0.132911	555	1.88126
QD	CAAGAT	2335	310	0.132762	556	0.0586993
YL	TATCTT	739	98	0.132612	557	1.78785
YI	TACATA	596	79	0.13255	558	0.00195177
AT	GCAACC	861	114	0.132404	559	1.95339
YI	TACATC	2425	321	0.132371	560	0
ED	GAGGAT	4653	615	0.132173	561	0
SI	AGTATC	734	97	0.132153	562	0.773042
GW	GGCTGG	2075	274	0.132048	563	0
II	ATAATT	751	99	0.131824	564	1.37913
DE	GACGAG	2610	344	0.131801	565	0
RS	CGATCA	258	34	0.131783	566	1.94818
RG	CGAGGA	934	123	0.131692	567	1.86847
TL	ACGCTT	281	37	0.131673	568	1.75426
FI	TTCATT	1992	262	0.131526	569	0.227226
GL	GGCCTT	1579	207	0.131096	570	0.51784
TP	ACACCC	1474	193	0.130936	571	0.497331
GS	GGAAGT	1423	186	0.13071	572	1.0601
AI	GCTATA	475	62	0.130526	573	0.236112
PG	CCCGGG	912	119	0.130482	574	0.896763
RE	AGGGAA	1580	206	0.13038	575	0.0430641
NS	AACTCG	537	70	0.130354	576	1.31992
GA	GGAGCG	515	67	0.130097	577	1.4582
AE	GCCGAG	2407	313	0.130037	578	0
GS	GGCTCG	600	78	0.13	579	1.05225
RD	AGGGAC	1593	207	0.129944	580	0.196375
QD	CAAGAC	2032	264	0.129921	581	0.0274912
SD	TCTGAT	2474	321	0.129749	582	0.712493
VP	GTTCCA	1218	158	0.129721	583	0.656547
DR	GACAGG	2043	265	0.129711	584	0.726754
GS	GGTAGT	455	59	0.12967	585	1.04858
VD	GTTGAT	1481	192	0.129642	586	0.324924
PI	CCAATC	679	88	0.129602	587	0.699862
RE	AGAGAA	2786	361	0.129576	588	0.0341479
EY	GAGTAC	2564	332	0.129485	589	0
SK	AGTAAG	1143	148	0.129484	590	1.60628
RI	CGCATC	1485	192	0.129293	591	1.48521
GP	GGGCCA	1277	165	0.129209	592	0.520951
QI	CAAATA	658	85	0.129179	593	0
VP	GTGCCC	2540	328	0.129134	594	0.650004
DG	GACGGG	992	128	0.129032	595	1.14096
AP	GCGCCC	807	104	0.128872	596	1.72535
CD	TGCGAT	326	42	0.128834	597	0.126872
DT	GATACT	1064	137	0.128759	598	1.47017
DL	GATTTA	988	127	0.128543	599	0.772604
AP	GCGCCT	537	69	0.128492	600	1.72108
YS	TATTCA	615	79	0.128455	601	1.68448
NY	AATTAT	935	120	0.128342	602	0.390487
EE	GAAGAG	9557	1226	0.128283	603	0.685909
EL	GAACTC	1989	255	0.128205	604	0.812993
RP	CGACCA	398	51	0.128141	605	1.98333
GY	GGATAT	718	92	0.128134	606	0.614229
QK	CAGAAG	7401	948	0.128091	607	1.22818
AP	GCGCCA	406	52	0.128079	608	1.71643
PS	CCTTCG	414	53	0.128019	609	1.75325
GR	GGCAGA	1228	157	0.12785	610	0
VP	GTACCT	791	101	0.127686	611	0.633742
GA	GGTGCG	376	48	0.12766	612	1.43091
QD	CAGGAC	4354	555	0.127469	613	0
YA	TATGCA	1468	187	0.127384	614	1.30737
CH	TGTCAC	762	97	0.127297	615	1.37853
AC	GCGTGT	275	35	0.127273	616	1.74425
GP	GGGCCG	550	70	0.127273	617	0.499167
SK	TCTAAG	1321	168	0.127176	618	1.58034
QP	CAACCC	700	89	0.127143	619	0.0730522
AR	GCGAGG	307	39	0.127036	620	1.63507
WR	TGGCGA	331	42	0.126888	621	1.0502
SD	TCGGAC	718	91	0.126741	622	0.678647
RP	CGTCCA	379	48	0.126649	623	1.96644
RE	AGAGAG	2750	348	0.126545	624	0
SI	TCTATT	735	93	0.126531	625	0.710324
NR	AATAGA	664	84	0.126506	626	0.96063
AR	GCAAGG	783	99	0.126437	627	1.62825
GA	GGTGCA	1218	154	0.126437	628	1.41703
RD	AGGGAT	1211	153	0.126342	629	0.155823
HD	CATGAT	1584	200	0.126263	630	1.26982
YA	TATGCG	349	44	0.126074	631	1.29246
EM	GAAATG	3161	398	0.12591	632	0.283889
RI	CGAATA	318	40	0.125786	633	1.44554
RK	CGAAAG	978	123	0.125767	634	2.00096
PN	CCTAAT	780	98	0.125641	635	0.503075
AS	GCGAGT	207	26	0.125604	636	1.6171
TV	ACGGTA	231	29	0.125541	637	1.83278
NV	AATGTA	1085	136	0.125346	638	1.07564
GH	GGACAT	919	115	0.125136	639	1.29061
SI	TCGATT	144	18	0.125	640	0.692766
AI	GCCATT	2692	336	0.124814	641	0.171554
AP	GCACCC	1347	168	0.124722	642	1.67811
RI	CGGATA	361	45	0.124654	643	1.4325
HD	CATGAC	1829	227	0.124112	644	1.24503
EA	GAAGCT	3983	494	0.124027	645	0.804509
AN	GCGAAC	234	29	0.123932	646	0.730088
GM	GGCATG	2640	327	0.123864	647	0
GH	GGGCAC	929	115	0.123789	648	1.275
TI	ACTATC	671	83	0.123696	649	0.437098
AS	GCGTCG	186	23	0.123656	650	1.59455
VN	GTTAAC	599	74	0.123539	651	0.574667
GG	GGTGGC	2639	326	0.123532	652	1.2226
AT	GCAACT	988	122	0.123482	653	1.85273
PS	CCTTCC	1937	239	0.123387	654	1.70008
WD	TGGGAC	1759	217	0.123366	655	0
CR	TGTCGG	373	46	0.123324	656	1.33456
CP	TGCCCG	422	52	0.123223	657	0.326754
PI	CCCATC	2720	335	0.123162	658	0.626325
IK	ATAAAG	1390	171	0.123022	659	1.88165
GA	GGAGCC	2553	314	0.122993	660	1.37718
AT	GCGACC	309	38	0.122977	661	1.84683
VP	GTTCCT	1749	215	0.122927	662	0.578943
HI	CATATT	781	96	0.122919	663	1.23705
GP	GGCCCT	1963	241	0.122771	664	0.447217
LI	CTAATT	498	61	0.12249	665	1.24872
SD	AGTGAC	3324	407	0.122443	666	0.628873
SD	TCTGAC	2445	299	0.12229	667	0.627076
GP	GGCCCC	1939	237	0.122228	668	0.440818
RS	CGATCG	90	11	0.122222	669	1.83952
AM	GCGATG	418	51	0.12201	670	1.24986
VI	GTAATC	410	50	0.121951	671	0.520023
DA	GATGCT	3995	487	0.121902	672	0.924958
NA	AATGCC	2740	334	0.121898	673	1.00327
TP	ACTCCT	1625	198	0.121846	674	0.393528
PE	CCAGAA	4073	496	0.121778	675	0.294517
EA	GAAGCC	4470	544	0.1217	676	0.777185
TP	ACTCCC	1127	137	0.121562	677	0.390156
DS	GACTCC	2634	320	0.121488	678	1.0998
AK	GCTAAG	1575	191	0.12127	679	1.50866
PN	CCAAAT	1501	182	0.121252	680	0.451782
EG	GAAGGA	3352	406	0.121122	681	1.42752
ET	GAAACT	1924	233	0.121102	682	0.528375
NT	AATACC	885	107	0.120904	683	1.25097
QP	CAACCT	786	95	0.120865	684	0
RI	CGGATC	993	120	0.120846	685	1.38774
VP	GTTCCC	1051	127	0.120837	686	0.554202
FD	TTTGAT	3683	445	0.120825	687	0.929911
TT	ACGACG	149	18	0.120805	688	1.7773
TD	ACCGAC	812	98	0.12069	689	0
PK	CCAAAG	2396	289	0.120618	690	0.897642
QW	CAATGG	390	47	0.120513	691	0.0560197
VP	GTGCCT	2242	270	0.120428	692	0.549309
CK	TGCAAG	2022	243	0.120178	693	1.82044
SD	TCCGAC	683	82	0.120059	694	0.600503
AS	GCTTCC	1741	209	0.120046	695	1.55181
AD	GCCGAC	1225	147	0.12	696	0
EA	GAAGCG	860	103	0.119767	697	0.754089
SI	TCCATC	2739	328	0.119752	698	0.630884
QK	CAAAAG	1721	206	0.119698	699	1.13041
VD	GTAGAC	1265	151	0.119368	700	0.205801
GC	GGATGT	478	57	0.119247	701	0.818736
EP	GAGCCA	3046	363	0.119173	702	0
VP	GTGCCA	1738	207	0.119102	703	0.533339
EL	GAATTA	1134	135	0.119048	704	0.706078
AR	GCGAGA	219	26	0.118721	705	1.53742
NS	AATAGT	767	91	0.118644	706	1.18413
MP	ATGCCA	1417	168	0.11856	707	0.0877775
ER	GAGCGA	1299	154	0.118553	708	0.718145
PE	CCCGAG	2111	250	0.118427	709	0.25427
DV	GACGTA	304	36	0.118421	710	0.609475
AI	GCTATC	1022	121	0.118395	711	0.095383
HI	CATATC	718	85	0.118384	712	1.18282
HP	CATCCC	896	106	0.118304	713	1.72012
DV	GATGTG	5091	602	0.118248	714	0.607364
PG	CCGGGG	677	80	0.118168	715	0.753752
RS	CGCTCG	347	41	0.118156	716	1.7907
GA	GGTGCC	2041	241	0.118079	717	1.31837
YL	TATTTA	576	68	0.118056	718	1.62011
EL	GAATTG	1364	161	0.118035	719	0.693756
CD	TGCGAC	517	61	0.117988	720	0
EL	GAACTG	3757	442	0.117647	721	0.689004
HG	CATGGA	1548	182	0.117571	722	1.68605
FE	TTTGAA	4186	492	0.117535	723	0.494868
VS	GTTTCC	979	115	0.117467	724	2.2779
VN	GTTAAT	733	86	0.117326	725	0.500222
QE	CAGGAA	4898	574	0.117191	726	0.396181
RA	CGTGCA	512	60	0.117188	727	1.62502
PI	CCCATT	1503	176	0.117099	728	0.553501
NR	AACAGG	1452	170	0.11708	729	0.848917
PT	CCGACT	299	35	0.117057	730	1.13449
AS	GCATCA	1034	121	0.117021	731	1.51499
GK	GGAAAA	2377	278	0.116954	732	0.327434
RV	CGCGTA	77	9	0.116883	733	2.44746
SK	TCCAAG	3388	396	0.116883	734	1.45857
PS	CCATCT	1558	182	0.116816	735	1.62113
PR	CCACGA	411	48	0.116788	736	1.27213
YD	TACGAT	643	75	0.116641	737	0.0320239
FP	TTTCCA	1295	151	0.116602	738	0.661325
CV	TGTGTT	892	104	0.116592	739	1.55298
PK	CCTAAG	1390	162	0.116547	740	0.84811
TY	ACGTAT	266	31	0.116541	741	1.49883
GG	GGAGGT	1520	177	0.116447	742	1.1374
TT	ACGACA	292	34	0.116438	743	1.72419
YR	TATCGG	378	44	0.116402	744	1.68991
RS	CGCTCC	1136	132	0.116197	745	1.76659
MP	ATGCCC	1533	178	0.116112	746	0.0576756
EL	GAACTA	1206	140	0.116086	747	0.669736
QW	CAGTGG	2286	265	0.115923	748	0
VE	GTCGAA	259	30	0.11583	749	0.668876
CE	TGCGAA	311	36	0.115756	750	0.245755
MP	ATGCCT	1581	183	0.11575	751	0.0531623
DC	GATTGT	648	75	0.115741	752	0.648524
VD	GTGGAT	4028	466	0.11569	753	0.160656
AT	GCAACA	1167	135	0.115681	754	1.75859
SD	AGTGAT	2438	282	0.115669	755	0.546762
RP	CGACCT	467	54	0.115632	756	1.83514
PN	CCCAAT	1549	179	0.115558	757	0.38239
ET	GAGACT	2357	272	0.115401	758	0.458808
CH	TGTCAT	572	66	0.115385	759	1.23679
RN	CGGAAT	728	84	0.115385	760	1.23502
TI	ACCATT	1926	222	0.115265	761	0.335251
YN	TACAAT	1432	165	0.115223	762	0.0778011
TV	ACGGTT	356	41	0.115169	763	1.70837
PK	CCCAAG	3962	456	0.115093	764	0.830006
GP	GGCCCA	1495	172	0.11505	765	0.353507
SI	TCGATA	87	10	0.114943	766	0.57175
PE	CCGGAA	818	94	0.114914	767	0.210828
NA	AATGCT	2431	279	0.114768	768	0.916315
TP	ACTCCG	401	46	0.114713	769	0.306499
ES	GAGTCG	680	78	0.114706	770	0.957068
AS	GCGAGC	375	43	0.114667	771	1.48567
NA	AATGCG	471	54	0.11465	772	0.914833
RR	CGACGA	192	22	0.114583	773	2.53472
SI	TCCATA	707	81	0.114569	774	0.567049
AA	GCAGCA	2885	330	0.114385	775	1.91854
RK	CGTAAG	341	39	0.11437	776	1.86391
NV	AATGTT	1636	187	0.114303	777	0.942598
SE	TCTGAA	3115	356	0.114286	778	0.760014
HE	CATGAG	2529	289	0.114274	779	1.17724
RI	AGGATT	989	113	0.114257	780	1.30685
AG	GCTGGA	2567	293	0.114141	781	1.7976
ES	GAATCA	1104	126	0.11413	782	0.949813
DQ	GATCAG	2182	249	0.114115	783	1.34179
NL	AATCTA	631	72	0.114105	784	1.49521
YD	TACGAC	973	111	0.11408	785	0
FI	TTCATC	3214	366	0.113877	786	0.019351
NT	AATACT	871	99	0.113662	787	1.16187
RS	CGTAGC	229	26	0.113537	788	1.73318
RD	AGAGAT	2081	236	0.113407	789	0
ID	ATAGAC	1156	131	0.113322	790	0.96675
ER	GAGCGG	2438	276	0.113208	791	0.651587
VP	GTACCA	716	81	0.113128	792	0.459099
AS	GCTTCG	372	42	0.112903	793	1.46331
MI	ATGATT	1524	172	0.112861	794	0.160957
QN	CAGAAT	3032	342	0.112797	795	0.575064
AK	GCCAAG	6305	711	0.112768	796	1.40379
GS	GGTAGC	577	65	0.112652	797	0.845603
EV	GAAGTA	1901	214	0.112572	798	0.893455
KD	AAAGAC	3648	410	0.11239	799	0.230791
FI	TTCATA	712	80	0.11236	800	0
PI	CCGATA	89	10	0.11236	801	0.493893
RG	CGAGGG	847	95	0.112161	802	1.63687
YH	TATCAC	678	76	0.112094	803	1.9706
TR	ACGAGG	304	34	0.111842	804	1.82975
CS	TGTTCC	788	88	0.111675	805	1.4294
GA	GGTGCT	1899	212	0.111638	806	1.23743
PS	CCTTCT	1998	223	0.111612	807	1.55538
MP	ATGCCG	493	55	0.111562	808	0
VG	GTGGGA	1823	203	0.111355	809	1.68354
GK	GGGAAA	2847	317	0.111345	810	0.256531
SP	TCTCCC	1527	170	0.111329	811	0.982331
SE	TCCGAA	486	54	0.111111	812	0.719372
SE	AGTGAA	3125	347	0.11104	813	0.718448
DG	GATGGC	3947	438	0.11097	814	0.923403
SP	TCTCCA	2499	277	0.110844	815	0.976032
AI	GCCATC	4593	509	0.110821	816	0
DL	GACCTT	2229	247	0.110812	817	0.558472
VW	GTATGG	352	39	0.110795	818	0.221033
QG	CAGGGA	1888	209	0.110699	819	1.50386
RA	CGAGCG	253	28	0.110672	820	1.54249
WG	TGGGGA	940	104	0.110638	821	1.5179
GS	GGAAGC	1620	179	0.110494	822	0.8177
CV	TGTGTA	625	69	0.1104	823	1.47425
GL	GGCCTA	707	78	0.110325	824	0.268984
LD	TTAGAC	825	91	0.110303	825	0.861365
VI	GTCATA	662	73	0.110272	826	0.374784
PI	CCAATA	463	51	0.110151	827	0.465255
DV	GACGTT	554	61	0.110108	828	0.504473
RI	AGGATC	1290	142	0.110078	829	1.25309
LI	TTAATC	418	46	0.110048	830	1.09419
II	ATAATA	400	44	0.11	831	1.11802
LP	CTTCCG	373	41	0.10992	832	1.8763
SD	TCAGAC	2411	265	0.109913	833	0.473126
RG	CGCGGA	164	18	0.109756	834	1.60561
VD	GTGGAC	4984	547	0.109751	835	0.0846263
YL	TATTTG	840	92	0.109524	836	1.51189
GL	GGGTTA	347	38	0.10951	837	0.258284
YA	TATGCC	1801	197	0.109384	838	1.08758
EV	GAAGTT	2406	263	0.10931	839	0.851029
YN	TACAAC	2180	238	0.109174	840	0
CP	TGCCCT	1063	116	0.109125	841	0.151468
WM	TGGATG	1329	145	0.109105	842	0
GS	GGTTCA	651	71	0.109063	843	0.798896
YG	TATGGT	1073	117	0.10904	844	1.35547
FD	TTTGAC	3430	374	0.109038	845	0.781816
QG	CAAGGA	1901	207	0.10889	846	1.48009
SD	TCAGAT	2473	269	0.108775	847	0.458109
TP	ACCCCG	736	80	0.108696	848	0.228761
PR	CCTCGA	838	91	0.108592	849	1.16715
EC	GAATGC	1116	121	0.108423	850	0.483549
YW	TACTGG	1356	147	0.108407	851	0
NH	AATCAT	858	93	0.108392	852	0.806518
EL	GAGCTT	2465	267	0.108316	853	0.569791
VE	GTTGAA	2023	219	0.108255	854	0.5713
RA	CGTGCC	878	95	0.1082	855	1.50991
AR	GCTCGG	1091	118	0.108158	856	1.40297
ER	GAGAGG	3015	326	0.108126	857	0.58533
CL	TGTCTT	620	67	0.108065	858	1.35475
VD	GTCGAC	389	42	0.107969	859	0.0610087
RA	CGTGCG	176	19	0.107955	860	1.50662
PG	CCTGGC	2753	297	0.107882	861	0.622366
WN	TGGAAT	1261	136	0.107851	862	0.350443
AP	GCGCCG	362	39	0.107735	863	1.46689
DR	GACCGC	1328	143	0.107681	864	0.45821
RS	CGCTCT	771	83	0.107652	865	1.6564
YT	TATACA	706	76	0.107649	866	1.53135
FK	TTCAAG	3384	364	0.107565	867	1.24934
WI	TGGATA	447	48	0.107383	868	0
GG	GGTGGT	1593	171	0.107345	869	1.01997
RA	CGAGCA	764	82	0.10733	870	1.49825
YV	TATGTA	699	75	0.107296	871	1.84336
AS	GCAAGT	960	103	0.107292	872	1.38976
ER	GAGCGT	961	103	0.10718	873	0.572652
NW	AACTGG	1727	185	0.107122	874	0
KD	AAAGAT	3996	428	0.107107	875	0.161327
RP	CGTCCT	430	46	0.106977	876	1.7229
VP	GTGCCG	608	65	0.106908	877	0.377505
SI	AGCATT	1600	171	0.106875	878	0.466762
ER	GAGCGC	2162	231	0.106846	879	0.568143
ES	GAGTCT	2528	270	0.106804	880	0.854092
NR	AACCGC	1002	107	0.106786	881	0.716152
PG	CCTGGT	1813	193	0.106453	882	0.603129
RS	CGTTCA	301	32	0.106312	883	1.63833
GA	GGAGCT	2127	226	0.106253	884	1.16611
NS	AACTCC	1742	185	0.1062	885	1.02427
KE	AAAGAG	5233	555	0.106058	886	0.324754
TI	ACCATC	3615	383	0.105947	887	0.213648
LG	TTAGGA	708	75	0.105932	888	1.52074
ER	GAAAGA	2493	264	0.105897	889	0.555271
NL	AATTTG	1125	119	0.105778	890	1.38589
YP	TATCCC	624	66	0.105769	891	0.905977
WR	TGGCGT	265	28	0.10566	892	0.786076
GG	GGGGGC	2035	215	0.105651	893	0.99703
GL	GGCTTA	786	83	0.105598	894	0.205803
ET	GAAACC	1878	198	0.105431	895	0.328457
DK	GATAAA	2420	255	0.105372	896	0.451143
VW	GTGTGG	1576	166	0.10533	897	0.14805
PS	CCGTCG	209	22	0.105263	898	1.47089
CN	TGTAAC	894	94	0.105145	899	0.428313
PT	CCGACC	352	37	0.105114	900	0.979233
HP	CATCCG	276	29	0.105072	901	1.54901
TW	ACATGG	686	72	0.104956	902	0.552089
AM	GCAATG	1153	121	0.104944	903	1.03248
YS	TATAGT	448	47	0.104911	904	1.39237
VD	GTCGAT	410	43	0.104878	905	0.0191023
RS	CGCTCA	601	63	0.104825	906	1.618
NS	AATTCA	1059	111	0.104816	907	1.00534
TT	ACGACC	334	35	0.10479	908	1.57213
ES	GAGTCC	2387	250	0.104734	909	0.825859
WE	TGGGAA	1797	188	0.104619	910	0.210862
GQ	GGCCAG	3661	383	0.104616	911	0.328141
MI	ATGATC	1715	179	0.104373	912	0.0481619
NV	AATGTC	2054	214	0.104187	913	0.808908
VE	GTTGAG	1393	145	0.104092	914	0.514723
AA	GCAGCT	3335	347	0.104048	915	1.7819
GY	GGTTAC	702	73	0.103989	916	0.313005
TK	ACCAAG	4257	442	0.103829	917	1.31557
AG	GCCGGA	492	51	0.103659	918	1.65862
NY	AACTAT	1400	145	0.103571	919	0.0811164
VD	GTAGAT	1372	142	0.103499	920	0
EM	GAGATG	4680	484	0.103419	921	0
WW	TGGTGG	851	88	0.103408	922	0
AA	GCGGCA	590	61	0.10339	923	1.77274
PN	CCAAAC	1317	136	0.103265	924	0.220118
DS	GACTCT	2539	262	0.10319	925	0.864289
EV	GAAGTC	2423	250	0.103178	926	0.767737
TK	ACTAAG	1028	106	0.103113	927	1.30559
SE	TCTGAG	3834	395	0.103026	928	0.610371
RP	CGTCCC	389	40	0.102828	929	1.66583
VR	GTTAGG	253	26	0.102767	930	1.61791
KE	AAAGAA	6278	645	0.10274	931	0.278899
SI	TCAATC	352	36	0.102273	932	0.403259
GQ	GGGCAA	675	69	0.102222	933	0.294743
RS	CGGTCT	460	47	0.102174	934	1.58104
GT	GGCACG	676	69	0.102071	935	0
AR	GCTCGA	774	79	0.102067	936	1.31935
SK	TCGAAG	441	45	0.102041	937	1.26265
FG	TTTGGT	1707	174	0.101933	938	0.580165
RR	AGACGT	216	22	0.101852	939	2.36479
SE	AGTGAG	3723	379	0.1018	940	0.593101
VR	GTGCGA	541	55	0.101664	941	1.60234
YS	TACTCC	1280	130	0.101562	942	1.34558
ID	ATAGAT	1183	120	0.101437	943	0.806909
AH	GCGCAC	424	43	0.101415	944	1.57609
GS	GGGTCA	710	72	0.101408	945	0.693912
PS	CCATCG	375	38	0.101333	946	1.416
EH	GAGCAC	2864	290	0.101257	947	0.711169
FP	TTCCCG	682	69	0.101173	948	0.456553
VN	GTGAAT	2086	211	0.101151	949	0.286202
MI	ATGATA	634	64	0.100946	950	0
PR	CCGCGG	288	29	0.100694	951	1.05822
PS	CCCTCT	1560	157	0.100641	952	1.40611
GS	GGGAGT	805	81	0.100621	953	0.682667
YE	TACGAG	1352	136	0.100592	954	0.0608204
KD	AAGGAC	4961	499	0.100585	955	0.070682
YQ	TATCAG	1452	146	0.100551	956	1.55107
CC	TGTTGC	259	26	0.100386	957	0.981312
NS	AATAGC	837	84	0.100358	958	0.942649
DT	GATACG	289	29	0.100346	959	1.11048
LW	TTATGG	309	31	0.100324	960	1.37157
TC	ACGTGT	359	36	0.100279	961	1.44675
DG	GATGGT	2244	225	0.100267	962	0.777081
AS	GCTTCT	1910	191	0.1	963	1.28822
VR	GTTCGC	400	40	0.1	964	1.57854
YS	TACTCT	941	94	0.0998937	965	1.32168
NS	AACTCT	1512	151	0.0998677	966	0.935578
TP	ACCCCC	1204	120	0.0996678	967	0.103666
SI	TCAATT	482	48	0.0995851	968	0.364839
GA	GGGGCA	1256	125	0.0995223	969	1.0717
LD	TTAGAT	1186	118	0.0994941	970	0.712575
NR	AACCGT	553	55	0.0994575	971	0.613576
AL	GCGCTT	332	33	0.0993976	972	1.39362
DQ	GATCAA	1138	113	0.099297	973	1.14111
PE	CCGGAG	1551	154	0.0992908	974	0
LI	CTAATC	413	41	0.0992736	975	0.945539
GK	GGTAAA	1079	107	0.0991659	976	0.0894065
FE	TTCGAA	474	47	0.0991561	977	0.249555
VE	GTGGAA	4400	436	0.0990909	978	0.44369
TL	ACGTTA	182	18	0.0989011	979	1.34137
YC	TATTGC	364	36	0.0989011	980	0.874019
HE	CATGAA	2508	248	0.0988836	981	0.968536
TR	ACACGG	506	50	0.0988142	982	1.65108
HK	CATAAG	1175	116	0.0987234	983	1.67376
CA	TGTGCA	1246	123	0.0987159	984	1.60116
GS	GGCTCA	1490	147	0.0986577	985	0.654238
LI	TTAATT	690	68	0.0985507	986	0.934995
RI	CGCATA	203	20	0.0985222	987	1.09309
GA	GGGGCT	1675	165	0.0985075	988	1.05691
VS	GTGTCC	2408	237	0.0984219	989	2.02269
DL	GACTTA	1230	121	0.098374	990	0.386707
DV	GACGTG	1983	195	0.0983359	991	0.341339
AV	GCAGTC	1261	124	0.0983347	992	1.20228
QR	CAGCGA	1078	106	0.0983302	993	1.08483
AR	GCACGT	234	23	0.0982906	994	1.26496
EL	GAGCTC	3938	387	0.0982732	995	0.429409
CP	TGCCCA	1028	101	0.098249	996	0
TC	ACGTGC	397	39	0.0982368	997	1.41708
SP	TCTCCG	499	49	0.0981964	998	0.801238
SR	TCGCGT	51	5	0.0980392	999	2.18348
VN	GTCAAT	1469	144	0.0980259	1000	0.240933
SI	AGCATA	674	66	0.0979228	1001	0.340555
NY	AACTAC	2104	206	0.0979087	1002	0
CS	TGTTCT	838	82	0.097852	1003	1.23876
RN	AGGAAT	1114	109	0.0978456	1004	0.997148
PN	CCCAAC	2577	252	0.0977881	1005	0.141498
YP	TATCCG	174	17	0.0977011	1006	0.791504
DS	GACTCG	911	89	0.0976948	1007	0.785337
CE	TGCGAG	758	74	0.0976253	1008	0
VG	GTTGGA	1486	145	0.0975774	1009	1.493
AT	GCAACG	287	28	0.097561	1010	1.51281
WC	TGGTGC	533	52	0.097561	1011	0.468849
GG	GGGGGT	964	94	0.0975104	1012	0.88135
FP	TTTCCT	1621	158	0.0974707	1013	0.402769
YA	TATGCT	1529	149	0.0974493	1014	0.920904
GL	GGCTTG	1685	164	0.0973294	1015	0.0881678
LI	TTAATA	442	43	0.0972851	1016	0.916347
PR	CCTCGG	1234	120	0.0972447	1017	1.00793
YL	TATCTC	751	73	0.0972037	1018	1.33973
GY	GGTTAT	741	72	0.097166	1019	0.215103
GG	GGCGGG	793	77	0.0970996	1020	0.87526
AN	GCTAAT	886	86	0.0970655	1021	0.377573
VP	GTCCCC	1463	142	0.0970608	1022	0.238097
RW	CGATGG	340	33	0.0970588	1023	1.03873
TN	ACAAAT	1258	122	0.0969793	1024	0.925525
SP	AGTCCC	1166	113	0.0969125	1025	0.782251
TP	ACCCCA	2003	194	0.0968547	1026	0.0623614
RS	CGGTCC	620	60	0.0967742	1027	1.50271
QE	CAAGAA	3528	341	0.0966553	1028	0.118244
YE	TACGAA	674	65	0.0964392	1029	0
FE	TTTGAG	4389	423	0.0963773	1030	0.208547
VS	GTGTCG	519	50	0.0963391	1031	1.99184
FW	TTTTGG	644	62	0.0962733	1032	0.176113
VN	GTCAAC	2187	210	0.0960219	1033	0.211134
DS	GATAGT	813	78	0.095941	1034	0.759202
NQ	AATCAG	1856	178	0.0959052	1035	1.38385
TR	ACGCGT	73	7	0.0958904	1036	1.60775
KD	AAGGAT	3811	365	0.0957754	1037	0
GY	GGCTAT	1746	167	0.0956472	1038	0.192374
PG	CCAGGT	1444	138	0.0955679	1039	0.447505
VM	GTTATG	628	60	0.0955414	1040	0.7803
EL	GAGTTA	1068	102	0.0955056	1041	0.388196
YC	TATTGT	409	39	0.0953545	1042	0.821333
AR	GCGCGC	451	43	0.0953437	1043	1.22104
FD	TTCGAT	693	66	0.0952381	1044	0.586597
YL	TATCTA	357	34	0.0952381	1045	1.31025
KG	AAGGGA	1839	175	0.0951604	1046	1.0499
FR	TTTCGA	557	53	0.0951526	1047	1.20332
VW	GTCTGG	1052	100	0.095057	1048	0
LP	TTACCG	137	13	0.0948905	1049	1.66418
RG	CGTGGC	812	77	0.0948276	1050	1.39468
SE	AGCGAA	612	58	0.0947712	1051	0.48989
AP	GCTCCC	1583	150	0.0947568	1052	1.2817
PS	CCCTCG	708	67	0.0946328	1053	1.3173
TA	ACGGCA	518	49	0.0945946	1054	1.66399
RS	AGATCG	127	12	0.0944882	1055	1.46822
AK	GCGAAA	307	29	0.0944625	1056	1.14825
GY	GGGTAT	487	46	0.0944559	1057	0.174291
MD	ATGGAT	2848	269	0.0944522	1058	0.28187
HP	CATCCA	1027	97	0.0944499	1059	1.39525
YP	TATCCT	838	79	0.0942721	1060	0.739959
TE	ACAGAA	3676	346	0.094124	1061	0.549128
LS	CTATCG	85	8	0.0941176	1062	2.3061
PW	CCTTGG	712	67	0.0941011	1063	0.350685
WY	TGGTAT	659	62	0.0940819	1064	0.21143
FG	TTTGGC	2286	215	0.0940507	1065	0.464052
SI	AGCATC	3073	289	0.0940449	1066	0.282259
MG	ATGGGA	1554	146	0.0939511	1067	1.13734
EG	GAAGGG	2555	240	0.0939335	1068	1.06078
HW	CATTGG	362	34	0.0939227	1069	0.591757
TR	ACGCGG	213	20	0.0938967	1070	1.57744
AA	GCGGCT	767	72	0.0938722	1071	1.63342
ET	GAGACC	3519	330	0.0937766	1072	0.159454
EH	GAACAT	1643	154	0.093731	1073	0.599745
YP	TATCCA	843	79	0.0937129	1074	0.731377
VP	GTCCCT	1559	146	0.0936498	1075	0.186484
II	ATAATC	438	41	0.0936073	1076	0.885209
EL	GAGCTA	1807	169	0.0935252	1077	0.357966
RS	CGGTCA	396	37	0.0934343	1078	1.45204
FP	TTCCCC	1703	159	0.0933647	1079	0.340677
QN	CAGAAC	3720	347	0.0932796	1080	0.30097
SP	AGTCCA	1158	108	0.0932642	1081	0.726893
TW	ACTTGG	547	51	0.0932358	1082	0.381257
GK	GGCAAA	2532	236	0.093207	1083	0
QE	CAGGAG	8231	767	0.0931843	1084	0.0654821
SP	TCGCCA	408	38	0.0931373	1085	0.724927
SD	AGCGAT	741	69	0.0931174	1086	0.233888
YR	TATCGC	333	31	0.0930931	1087	1.36754
SE	TCCGAG	1183	110	0.0929839	1088	0.462422
DT	GATACA	1217	113	0.0928513	1089	0.998487
VR	GTTCGG	571	53	0.0928196	1090	1.47104
AA	GCAGCG	873	81	0.0927835	1091	1.61659
TP	ACCCCT	1574	146	0.0927573	1092	0
KE	AAGGAG	8498	788	0.0927277	1093	0.130977
PS	CCTTCA	1674	155	0.0925926	1094	1.28586
CR	TGTCGA	292	27	0.0924658	1095	0.919092
RA	CGTGCT	584	54	0.0924658	1096	1.28319
SG	TCCGGT	292	27	0.0924658	1097	1.97445
EV	GAAGTG	3943	364	0.0923155	1098	0.607248
AP	GCTCCA	1799	166	0.0922735	1099	1.24339
IP	ATACCC	423	39	0.0921986	1100	1.1608
MK	ATGAAG	4428	408	0.0921409	1101	1.11855
PV	CCGGTA	163	15	0.0920245	1102	0.902197
VR	GTACGC	250	23	0.092	1103	1.45824
YV	TATGTT	1068	98	0.0917603	1104	1.61771
NG	AACGGA	709	65	0.0916784	1105	0.694694
SN	TCTAAT	742	68	0.0916442	1106	0.759945
TE	ACAGAG	4474	410	0.0916406	1107	0.510551
VN	GTAAAT	884	81	0.091629	1108	0.143574
IE	ATAGAA	1845	169	0.0915989	1109	1.13254
LI	CTGATC	2140	196	0.0915888	1110	0.8293
GL	GGCCTG	4194	384	0.0915594	1111	0
EC	GAGTGC	1890	173	0.0915344	1112	0.239265
IG	ATAGGA	700	64	0.0914286	1113	1.22198
RN	CGCAAC	777	71	0.0913771	1114	0.898474
TI	ACCATA	799	73	0.0913642	1115	0
PR	CCGAGA	274	25	0.0912409	1116	0.915988
VN	GTGAAC	2587	236	0.0912254	1117	0.137205
CR	TGTAGG	296	27	0.0912162	1118	0.899463
PK	CCTAAA	1305	119	0.0911877	1119	0.494113
GA	GGGGCC	2118	193	0.0911237	1120	0.944508
TM	ACGATG	439	40	0.0911162	1121	0.847243
EA	GAGGCG	1441	131	0.0909091	1122	0.35635
RT	CGAACG	99	9	0.0909091	1123	1.88565
TA	ACGGCC	924	84	0.0909091	1124	1.60666
YH	TATCAT	627	57	0.0909091	1125	1.66838
ET	GAAACA	2334	212	0.0908312	1126	0.113413
AA	GCAGCC	3976	361	0.0907948	1127	1.58533
RN	CGGAAC	1058	96	0.0907372	1128	0.888336
AW	GCCTGG	2009	182	0.0905923	1129	0.0422701
GH	GGGCAT	685	62	0.0905109	1130	0.823281
PV	CCTGTA	1105	100	0.0904977	1131	0.87806
TG	ACGGGG	597	54	0.0904523	1132	1.16652
PS	CCATCC	1526	138	0.0904325	1133	1.2518
RI	AGGATA	564	51	0.0904255	1134	0.969373
WE	TGGGAG	2113	191	0.0903928	1135	0
GS	GGGAGC	1529	138	0.0902551	1136	0.525814
VS	GTTTCT	1385	125	0.0902527	1137	1.89768
TR	ACTCGA	521	47	0.0902111	1138	1.51967
KG	AAAGGA	2839	256	0.0901726	1139	0.972224
VS	GTTTCA	854	77	0.0901639	1140	1.89627
CL	TGTTTG	677	61	0.0901034	1141	1.09251
GP	GGCCCG	633	57	0.0900474	1142	0
AN	GCCAAT	2129	191	0.0897135	1143	0.26394
RP	CGGCCA	981	88	0.0897044	1144	1.46885
QY	CAGTAC	2698	242	0.0896961	1145	0.322643
AV	GCGGTA	201	18	0.0895522	1146	1.06731
YT	TATACT	615	55	0.0894309	1147	1.26387
EA	GAGGCA	2978	266	0.0893217	1148	0.330936
AS	GCCTCG	908	81	0.089207	1149	1.12345
RH	CGACAC	527	47	0.0891841	1150	1.08952
YS	TACTCG	449	40	0.0890869	1151	1.15649
HG	CACGGA	539	48	0.0890538	1152	1.28526
QE	CAAGAG	3324	296	0.0890493	1153	0
LR	TTACGT	146	13	0.0890411	1154	1.98229
GF	GGATTC	1011	90	0.0890208	1155	0.912298
SK	AGCAAG	3732	332	0.0889603	1156	1.06474
SE	TCGGAA	709	63	0.0888575	1157	0.396935
NN	AACAAT	1836	163	0.08878	1158	0.040765
VG	GTAGGA	676	60	0.0887574	1159	1.35632
PN	CCGAAC	282	25	0.0886525	1160	0
RN	CGTAAC	192	17	0.0885417	1161	0.852998
YV	TATGTC	1299	115	0.0885296	1162	1.566
QN	CAAAAT	1300	115	0.0884615	1163	0.22446
VH	GTTCAC	984	87	0.0884146	1164	1.15045
TA	ACGGCT	600	53	0.0883333	1165	1.56519
RP	CGACCC	453	40	0.0883002	1166	1.44609
QY	CAATAT	521	46	0.0882917	1167	0.299877
AY	GCGTAT	272	24	0.0882353	1168	1.16188
VE	GTAGAA	2031	179	0.0881339	1169	0.274635
RG	CGTGGT	545	48	0.0880734	1170	1.28808
PL	CCGCTA	159	14	0.0880503	1171	1.5589
PS	CCCTCC	1840	162	0.0880435	1172	1.21318
EL	GAGCTG	9840	866	0.0880081	1173	0.270248
AW	GCTTGG	682	60	0.0879765	1174	0
ET	GAGACG	1308	115	0.0879205	1175	0.0664249
SP	AGTCCT	1456	128	0.0879121	1176	0.64163
CV	TGTGTC	1276	112	0.0877743	1177	1.14338
AN	GCTAAC	832	73	0.0877404	1178	0.231856
SR	AGTAGG	365	32	0.0876712	1179	2.02223
CL	TGTCTC	685	60	0.0875912	1180	1.05172
EE	GAGGAA	7686	673	0.0875618	1181	0.134953
DT	GACACT	2148	188	0.0875233	1182	0.913232
VR	GTTCGA	697	61	0.0875179	1183	1.38619
EC	GAGTGT	2457	215	0.0875051	1184	0.174318
AS	GCAAGC	870	76	0.0873563	1185	1.09321
NK	AATAAA	2096	183	0.0873092	1186	0.624558
DH	GACCAC	2235	195	0.0872483	1187	0.456055
IP	ATACCT	619	54	0.0872375	1188	1.081
YV	TATGTG	2512	219	0.0871815	1189	1.54386
RK	CGGAAG	2273	198	0.0871095	1190	1.47111
QM	CAGATG	4179	364	0.0871022	1191	0.00788507
TG	ACAGGA	2426	211	0.0869744	1192	1.10995
VP	GTCCCA	1173	102	0.0869565	1193	0.0795024
QS	CAGTCT	2301	200	0.0869187	1194	1.6543
RS	CGAAGT	564	49	0.0868794	1195	1.3471
DS	GATAGC	957	83	0.0867294	1196	0.613575
CV	TGCGTT	173	15	0.0867052	1197	1.1257
SN	TCGAAT	173	15	0.0867052	1198	0.680019
QM	CAAATG	1189	103	0.0866274	1199	0
NG	AATGGC	2684	232	0.0864382	1200	0.60978
FN	TTTAAT	1286	111	0.0863142	1201	0.201028
NN	AACAAC	2943	254	0.0863065	1202	0
IG	ATCGGA	510	44	0.0862745	1203	1.13827
RY	CGATAT	313	27	0.086262	1204	1.27508
QS	CAATCA	384	33	0.0859375	1205	1.63792
LI	CTGATT	1784	153	0.0857623	1206	0.734473
FR	TTCCGA	1143	98	0.0857393	1207	1.05304
SE	TCGGAG	1213	104	0.0857378	1208	0.345372
PL	CCTCTT	1283	110	0.0857366	1209	1.52049
RH	CGACAT	385	33	0.0857143	1210	1.03227
AR	GCGCGG	362	31	0.0856354	1211	1.06611
DL	GACCTC	3446	295	0.0856065	1212	0.18615
GY	GGGTAC	702	60	0.0854701	1213	0.0300709
YL	TATCTG	1206	103	0.0854063	1214	1.15306
CT	TGTACC	680	58	0.0852941	1215	1.12102
FW	TTCTGG	1643	140	0.08521	1216	0
DC	GACTGC	2113	180	0.0851869	1217	0.206331
RP	CGTCCG	94	8	0.0851064	1218	1.39294
AR	GCAAGA	1058	90	0.0850662	1219	1.05649
VI	GTAATA	341	29	0.085044	1220	0
RY	CGTTAT	247	21	0.0850202	1221	1.25416
TE	ACTGAG	2872	244	0.0849582	1222	0.401318
AR	GCGCGT	106	9	0.0849057	1223	1.05377
NT	AATACG	236	20	0.0847458	1224	0.738323
KE	AAGGAA	5940	503	0.0846801	1225	0
ET	GAAACG	579	49	0.0846287	1226	0.011372
CW	TGTTGG	331	28	0.0845921	1227	0.207186
WN	TGGAAC	1324	112	0.0845921	1228	0
CG	TGTGGG	2187	185	0.0845908	1229	1.30813
PS	CCGTCC	686	58	0.0845481	1230	1.15473
TR	ACACGA	296	25	0.0844595	1231	1.42462
SG	TCTGGA	2476	209	0.0844103	1232	1.84295
TR	ACGAGA	237	20	0.0843882	1233	1.4234
TE	ACTGAA	2479	209	0.0843082	1234	0.390237
NL	AATTTA	783	66	0.0842912	1235	1.05831
DL	GACCTA	1151	97	0.0842745	1236	0.163527
AS	GCCTCT	2380	200	0.0840336	1237	1.03726
ES	GAGTCA	1809	152	0.0840243	1238	0.508008
ET	GAGACA	2906	244	0.0839642	1239	0
AV	GCGGTC	441	37	0.0839002	1240	0.973255
VE	GTAGAG	1873	157	0.0838227	1241	0.202279
CR	TGTCGC	358	30	0.0837989	1242	0.777104
LA	CTAGCG	215	18	0.0837209	1243	2.81405
VS	GTGTCT	2389	200	0.083717	1244	1.78924
GY	GGCTAC	2676	224	0.083707	1245	0
SR	TCACGA	251	21	0.0836653	1246	1.95475
TL	ACGCTG	1626	136	0.0836408	1247	1.09959
VR	GTGCGC	1375	115	0.0836364	1248	1.32074
SK	TCAAAG	1568	131	0.0835459	1249	0.974147
GA	GGCGCA	395	33	0.0835443	1250	0.819223
GC	GGCTGC	1928	161	0.0835062	1251	0.30474
TV	ACGGTC	551	46	0.0834846	1252	1.2442
DA	GACGCC	1378	115	0.0834543	1253	0.37829
VT	GTGACC	2589	216	0.0834299	1254	1.3462
FE	TTCGAG	1151	96	0.0834057	1255	0
TE	ACCGAG	1343	112	0.0833954	1256	0.374532
CN	TGCAAT	1032	86	0.0833333	1257	0.0928926
GQ	GGCCAA	1044	87	0.0833333	1258	0
IG	ATAGGG	372	31	0.0833333	1259	1.08823
RS	AGGTCT	756	63	0.0833333	1260	1.28698
VS	GTTTCG	132	11	0.0833333	1261	1.78261
WL	TGGCTT	864	72	0.0833333	1262	1.25987
PR	CCCCGA	769	64	0.083225	1263	0.783324
SG	AGCGGA	493	41	0.0831643	1264	1.8215
SG	TCCGGA	397	33	0.0831234	1265	1.82079
CV	TGTGTG	2336	194	0.0830479	1266	1.06353
RY	CGATAC	470	39	0.0829787	1267	1.2191
VN	GTAAAC	651	54	0.0829493	1268	0
AQ	GCGCAG	1037	86	0.0829315	1269	1.13425
LG	CTAGGA	772	64	0.0829016	1270	1.16707
HD	CACGAT	580	48	0.0827586	1271	0.66037
QR	CAACGA	278	23	0.0827338	1272	0.835671
SP	TCTCCT	2285	189	0.0827133	1273	0.553689
RS	AGATCC	593	49	0.0826307	1274	1.27477
PR	CCACGC	437	36	0.0823799	1275	0.7686
AV	GCAGTT	1336	110	0.0823353	1276	0.946092
QY	CAGTAT	2235	184	0.0823266	1277	0.198957
PW	CCGTGG	401	33	0.0822943	1278	0.157265
VP	GTCCCG	401	33	0.0822943	1279	0
RA	CGAGCT	900	74	0.0822222	1280	1.1138
AG	GCGGGC	1010	83	0.0821782	1281	1.32361
AQ	GCACAG	2696	221	0.0819733	1282	1.11748
VC	GTGTGC	1625	133	0.0818462	1283	1.968
VM	GTGATG	2591	212	0.0818217	1284	0.556658
CT	TGTACA	599	49	0.081803	1285	1.06072
PW	CCCTGG	1345	110	0.0817844	1286	0.148299
WR	TGGAGG	905	74	0.081768	1287	0.416249
GF	GGTTTC	991	81	0.0817356	1288	0.789121
VS	GTATCT	673	55	0.0817236	1289	1.75447
RG	AGGGGA	563	46	0.0817052	1290	1.1798
TL	ACGCTC	563	46	0.0817052	1291	1.06581
NA	AACGCA	600	49	0.0816667	1292	0.42542
AG	GCTGGG	2499	204	0.0816327	1293	1.314
TR	ACCCGA	539	44	0.0816327	1294	1.37551
AH	GCACAC	1066	87	0.0816135	1295	1.2627
TV	ACAGTA	968	79	0.0816116	1296	1.21147
VA	GTTGCG	221	18	0.081448	1297	0.902364
AG	GCAGGC	2039	166	0.0814125	1298	1.3101
AS	GCTTCA	1339	109	0.081404	1299	0.991394
VC	GTATGC	295	24	0.0813559	1300	1.95933
TK	ACGAAA	369	30	0.0813008	1301	0.962705
TN	ACAAAC	1169	95	0.081266	1302	0.670501
WY	TGGTAC	923	75	0.0812568	1303	0
SA	TCCGCA	320	26	0.08125	1304	1.63185
FG	TTCGGC	714	58	0.0812325	1305	0.25267
QS	CAATCC	357	29	0.0812325	1306	1.55669
RG	CGGGGA	628	51	0.0812102	1307	1.17104
GA	GGGGCG	568	46	0.0809859	1308	0.774353
FN	TTTAAC	1174	95	0.0809199	1309	0.107926
DT	GACACC	2855	231	0.0809107	1310	0.799895
GC	GGGTGT	309	25	0.0809061	1311	0.259106
PY	CCATAC	940	76	0.0808511	1312	0.745178
VL	GTTCTT	1250	101	0.0808	1313	0.898972
LG	CTTGGA	1634	132	0.0807834	1314	1.12973
CR	TGTAGA	359	29	0.0807799	1315	0.72417
RY	CGGTAT	359	29	0.0807799	1316	1.18036
EF	GAATTC	1772	143	0.0806998	1317	0.706788
PT	CCAACC	1128	91	0.0806738	1318	0.597454
TH	ACGCAC	434	35	0.0806452	1319	1.00978
QS	CAATCT	397	32	0.0806045	1320	1.54549
KN	AAGAAT	3040	245	0.0805921	1321	1.02888
QR	CAGAGG	3190	257	0.0805643	1322	0.797334
SG	AGTGGA	2024	163	0.0805336	1323	1.77513
AV	GCAGTG	2870	231	0.0804878	1324	0.913351
NC	AATTGC	410	33	0.0804878	1325	0.772211
QR	CAACGG	373	30	0.080429	1326	0.794909
IR	ATACGG	224	18	0.0803571	1327	1.73471
ID	ATCGAT	996	80	0.0803213	1328	0.470179
FP	TTCCCT	1793	144	0.0803123	1329	0.123422
NG	AATGGT	1569	126	0.0803059	1330	0.503618
PT	CCAACT	1084	87	0.0802583	1331	0.590006
NH	AACCAC	1820	146	0.0802198	1332	0.372295
TL	ACACTT	961	77	0.0801249	1333	1.03763
AL	GCACTT	962	77	0.0800416	1334	1.08116
LD	CTAGAT	1287	103	0.0800311	1335	0.398524
CS	TGTTCG	125	10	0.08	1336	0.948161
VG	GTCGGA	275	22	0.08	1337	1.20645
GH	GGCCAC	2153	172	0.0798885	1338	0.643177
AL	GCACTC	964	77	0.0798755	1339	1.07816
PI	CCCATA	564	45	0.0797872	1340	0
EE	GAGGAG	13669	1090	0.0797425	1341	0
AR	GCTCGT	414	33	0.0797101	1342	0.96267
DR	GACCGT	791	63	0.079646	1343	0.0231246
TF	ACGTTC	540	43	0.0796296	1344	1.3116
YY	TATTAT	767	61	0.0795306	1345	0.752697
YS	TATAGC	554	44	0.0794224	1346	0.990827
CS	TGTAGT	643	51	0.0793157	1347	0.935768
SE	TCAGAA	3241	257	0.0792965	1348	0.232698
PL	CCGCTT	265	21	0.0792453	1349	1.4069
FM	TTTATG	1010	80	0.0792079	1350	0.369768
SD	AGCGAC	1124	89	0.0791815	1351	0
RA	CGCGCT	215	17	0.0790698	1352	1.0574
RP	CGGCCT	975	77	0.0789744	1353	1.28506
IL	ATACTT	456	36	0.0789474	1354	1.35873
PR	CCAAGG	912	72	0.0789474	1355	0.707199
SR	AGTCGA	380	30	0.0789474	1356	1.87101
AP	GCTCCT	2091	165	0.0789096	1357	1.01768
PS	CCGTCT	545	43	0.0788991	1358	1.05497
HI	CATATA	393	31	0.0788804	1359	0.597076
SP	TCACCG	355	28	0.0788732	1360	0.485104
EG	GAGGGA	1902	150	0.0788644	1361	0.808511
IK	ATAAAA	1269	100	0.0788022	1362	1.23905
CY	TGTTAT	330	26	0.0787879	1363	0.504043
LD	CTGGAT	5007	394	0.0786898	1364	0.374141
SR	TCCCGA	699	55	0.0786838	1365	1.86619
SW	AGTTGG	407	32	0.0786241	1366	0.719263
LA	CTCGCA	331	26	0.0785498	1367	2.72207
YG	TACGGG	535	42	0.0785047	1368	0.881463
LR	TTACGA	293	23	0.0784983	1369	1.80048
QA	CAAGCA	1683	132	0.0784314	1370	0.519867
RR	CGTCGG	306	24	0.0784314	1371	1.98783
DR	GACAGA	2271	178	0.0783796	1372	0
II	ATTATT	1213	95	0.0783182	1373	0.627936
TS	ACGTCC	511	40	0.0782779	1374	2.21044
IM	ATAATG	741	58	0.0782726	1375	1.03718
HG	CATGGG	1278	100	0.0782473	1376	1.09862
DG	GACGGC	1432	112	0.0782123	1377	0.418696
CR	TGCCGA	550	43	0.0781818	1378	0.677006
CN	TGCAAC	1331	104	0.0781367	1379	0
VR	GTGCGG	1229	96	0.0781123	1380	1.22216
AG	GCAGGT	1242	97	0.0780998	1381	1.25017
IS	ATATCC	461	36	0.0780911	1382	1.60067
LS	TTATCC	449	35	0.077951	1383	2.03421
RG	CGAGGT	552	43	0.0778986	1384	1.11097
NV	AATGTG	3044	237	0.0778581	1385	0.388652
VT	GTTACT	745	58	0.0778523	1386	1.24638
EK	GAAAAA	4192	326	0.0777672	1387	0.35353
DL	GACCTG	6366	495	0.0777568	1388	0.0473993
IE	ATAGAG	1595	124	0.0777429	1389	0.895921
LE	CTCGAG	849	66	0.0777385	1390	0.921046
AL	GCATTG	888	69	0.0777027	1391	1.03837
MD	ATGGAC	3012	234	0.0776892	1392	0
IS	ATATCT	605	47	0.077686	1393	1.59317
PR	CCTCGT	425	33	0.0776471	1394	0.683239
QA	CAGGCG	1082	84	0.077634	1395	0.505125
SN	AGTAAC	992	77	0.077621	1396	0.520347
DS	GACTCA	1765	137	0.0776204	1397	0.453491
DV	GACGTC	1108	86	0.0776173	1398	0
TL	ACGTTG	361	28	0.0775623	1399	0.990737
VC	GTGTGT	1599	124	0.0775485	1400	1.89018
EC	GAATGT	2347	182	0.0775458	1401	0
AL	GCTCTT	1458	113	0.0775034	1402	1.03467
VL	GTGCTC	2235	173	0.0774049	1403	0.837042
VL	GTGTTA	711	55	0.0773558	1404	0.836127
CA	TGTGCG	362	28	0.0773481	1405	1.24924
PK	CCGAAA	362	28	0.0773481	1406	0.256638
RK	CGCAAG	1642	127	0.0773447	1407	1.29958
SI	TCAATA	375	29	0.0773333	1408	0
TR	ACACGC	375	29	0.0773333	1409	1.29745
TS	ACGTCA	388	30	0.0773196	1410	2.19267
SP	TCACCA	1397	108	0.0773085	1411	0.456196
CR	TGTCGT	207	16	0.0772947	1412	0.660542
TL	ACGCTA	233	18	0.0772532	1413	0.984976
VR	GTACGA	246	19	0.0772358	1414	1.20588
LD	CTCGAT	518	40	0.0772201	1415	0.34694
TR	ACGCGC	259	20	0.0772201	1416	1.29534
AV	GCGGTT	285	22	0.077193	1417	0.85305
FN	TTCAAC	2516	194	0.0771065	1418	0.0382837
DK	GACAAA	3529	272	0.0770757	1419	0
LI	CTTATT	1012	78	0.0770751	1420	0.580393
GC	GGCTGT	1611	124	0.0769708	1421	0.187168
LG	CTGGGA	2716	209	0.0769514	1422	1.05962
VE	GTCGAG	494	38	0.0769231	1423	0.0783538
LI	CTTATC	885	68	0.0768362	1424	0.575914
VL	GTGCTT	1511	116	0.0767704	1425	0.825166
PG	CCCGGC	925	71	0.0767568	1426	0.131273
AC	GCATGC	430	33	0.0767442	1427	1.01446
AY	GCATAT	769	59	0.076723	1428	0.960184
WL	TGGCTC	1058	81	0.0765595	1429	1.13756
RP	AGGCCA	1072	82	0.0764925	1430	1.239
QA	CAGGCA	2904	222	0.0764463	1431	0.482883
TV	ACGGTG	1244	95	0.0763666	1432	1.11563
AY	GCATAC	668	51	0.0763473	1433	0.953102
RG	AGAGGA	1481	113	0.0762998	1434	1.08106
PG	CCAGGC	2373	181	0.0762748	1435	0.122185
VR	GTCCGA	762	58	0.0761155	1436	1.1848
NT	AATACA	986	75	0.0760649	1437	0.582413
AL	GCACTA	580	44	0.0758621	1438	1.00379
IP	ATACCA	620	47	0.0758065	1439	0.878377
HP	CATCCT	1215	92	0.0757202	1440	1.07638
QN	CAAAAC	1083	82	0.0757156	1441	0
QH	CAGCAC	3105	235	0.0756844	1442	0.51664
TF	ACGTTT	489	37	0.0756646	1443	1.23792
LD	TTGGAT	2516	190	0.0755167	1444	0.31476
NM	AACATG	3034	229	0.0754779	1445	0
TS	ACGTCT	424	32	0.0754717	1446	2.15778
YR	TACCGA	810	61	0.0753086	1447	1.06168
RP	CGGCCG	425	32	0.0752941	1448	1.21621
QG	CAGGGG	1501	113	0.0752831	1449	0.947616
DL	GACTTG	2565	193	0.0752437	1450	0
DA	GACGCG	452	34	0.0752212	1451	0.228444
AK	GCAAAA	1755	132	0.0752137	1452	0.819502
VL	GTTTTA	798	60	0.075188	1453	0.795119
LI	TTGATC	825	62	0.0751515	1454	0.543931
AY	GCGTAC	346	26	0.0751445	1455	0.930192
RL	CGTCTC	506	38	0.0750988	1456	1.29836
FN	TTCAAT	1718	129	0.0750873	1457	0
RV	CGTGTA	293	22	0.0750853	1458	1.809
VS	GTCTCC	1773	133	0.0750141	1459	1.63088
QS	CAATCG	80	6	0.075	1460	1.44152
QR	CAGCGT	867	65	0.0749712	1461	0.693529
WR	TGGAGA	868	65	0.0748848	1462	0.289386
PY	CCGTAT	374	28	0.0748663	1463	0.634227
LI	CTCATC	3814	285	0.0747247	1464	0.535714
AN	GCCAAC	3413	255	0.0747143	1465	0
LD	CTTGAT	1634	122	0.0746634	1466	0.298365
LP	CTTCCC	1380	103	0.0746377	1467	1.31782
PV	CCAGTA	925	69	0.0745946	1468	0.59925
QG	CAAGGG	1194	89	0.0745394	1469	0.933291
PT	CCGACG	161	12	0.0745342	1470	0.483257
TH	ACACAC	1168	87	0.0744863	1471	0.895171
HI	CACATT	1450	108	0.0744828	1472	0.514316
SR	TCTCGA	712	53	0.0744382	1473	1.78617
VL	GTTCTC	1157	86	0.0743302	1474	0.778565
LD	CTAGAC	1292	96	0.0743034	1475	0.291392
WS	TGGTCG	175	13	0.0742857	1476	0.638999
AT	GCTACA	1145	85	0.0742358	1477	1.11862
YY	TATTAC	916	68	0.0742358	1478	0.653302
QS	CAGTCC	2088	155	0.0742337	1479	1.42671
GF	GGGTTC	701	52	0.0741797	1480	0.649181
PG	CCCGGT	364	27	0.0741758	1481	0.0819285
SP	TCACCT	1362	101	0.0741557	1482	0.396125
ES	GAAAGC	2104	156	0.0741445	1483	0.32754
IS	ATTTCG	135	10	0.0740741	1484	1.52448
SR	TCACGT	162	12	0.0740741	1485	1.77909
VT	GTGACT	1971	146	0.0740741	1486	1.1746
AV	GCAGTA	959	71	0.0740355	1487	0.792797
VL	GTCTTA	676	50	0.0739645	1488	0.77145
EF	GAATTT	2353	174	0.0739482	1489	0.580737
TG	ACGGGA	514	38	0.07393	1490	0.875521
TM	ACAATG	1028	76	0.07393	1491	0.545695
VC	GTTTGT	582	43	0.0738832	1492	1.82033
EQ	GAACAG	3763	278	0.0738772	1493	0.488023
DC	GACTGT	2167	160	0.0738348	1494	0
RL	CGATTG	271	20	0.0738007	1495	1.2732
PW	CCATGG	664	49	0.0737952	1496	0
LK	TTAAAG	1478	109	0.0737483	1497	1.22138
FP	TTCCCA	1709	126	0.0737273	1498	0
VA	GTAGCG	190	14	0.0736842	1499	0.757841
TR	ACAAGG	774	57	0.0736434	1500	1.22692
NF	AATTTC	1073	79	0.0736253	1501	0.498629
PR	CCACGG	720	53	0.0736111	1502	0.606232
CR	TGCCGG	818	60	0.0733496	1503	0.584963
PL	CCTCTA	641	47	0.0733229	1504	1.29484
AR	GCCCGA	982	72	0.0733198	1505	0.842108
EA	GAGGCT	4051	297	0.0733152	1506	0.0460382
LG	TTGGGA	1228	90	0.0732899	1507	0.989285
CW	TGCTGG	928	68	0.0732759	1508	0
RM	CGGATG	969	71	0.0732714	1509	0.858751
LN	TTAAAT	1120	82	0.0732143	1510	0.935299
CM	TGTATG	601	44	0.0732113	1511	0.145017
WF	TGGTTC	1025	75	0.0731707	1512	0.458218
TN	ACTAAC	616	45	0.0730519	1513	0.516771
SP	AGCCCA	1944	142	0.0730453	1514	0.374359
PL	CCGTTA	137	10	0.0729927	1515	1.28833
EL	GAGTTG	1987	145	0.0729743	1516	0
CR	TGCCGT	370	27	0.072973	1517	0.577535
AC	GCATGT	521	38	0.0729367	1518	0.941044
PS	CCATCA	1330	97	0.0729323	1519	0.941521
SW	TCATGG	494	36	0.0728745	1520	0.609706
VE	GTGGAG	7302	532	0.0728568	1521	0
VS	GTATCC	563	41	0.0728242	1522	1.58813
KG	AAAGGG	1747	127	0.072696	1523	0.661412
QV	CAAGTA	798	58	0.0726817	1524	0.819187
RM	CGTATG	193	14	0.0725389	1525	0.844255
AS	GCCTCC	3021	219	0.0724926	1526	0.824126
MW	ATGTGG	1091	79	0.0724106	1527	0
WS	TGGTCC	760	55	0.0723684	1528	0.601275
RS	CGCAGC	1355	98	0.0723247	1529	1.08258
DF	GACTTC	4081	295	0.0722862	1530	0.566327
YS	TACTCA	844	61	0.0722749	1531	0.854776
AP	GCTCCG	595	43	0.0722689	1532	0.89085
CG	TGCGGA	263	19	0.0722433	1533	1.08049
LI	CTCATT	2118	153	0.072238	1534	0.486886
AQ	GCGCAA	194	14	0.0721649	1535	0.933624
LS	CTATCT	388	28	0.0721649	1536	1.92294
CS	TGCTCC	1332	96	0.0720721	1537	0.797601
LI	TTGATA	555	40	0.0720721	1538	0.483569
NG	AACGGT	444	32	0.0720721	1539	0.347552
ER	GAGAGA	2803	202	0.0720656	1540	0
YR	TACCGG	1055	76	0.0720379	1541	0.99762
LD	TTGGAC	2000	144	0.072	1542	0.245961
SE	AGCGAG	1792	129	0.0719866	1543	0.0931689
RN	AGGAAC	1681	121	0.071981	1544	0.554256
CY	TGCTAC	1142	82	0.0718039	1545	0.37013
PP	CCGCCT	808	58	0.0717822	1546	0.904031
GF	GGTTTT	906	65	0.0717439	1547	0.601013
PS	CCGAGC	488	35	0.0717213	1548	0.917364
QY	CAATAC	488	35	0.0717213	1549	0
VA	GTGGCA	2580	185	0.0717054	1550	0.718568
WH	TGGCAC	810	58	0.0716049	1551	0.0541839
EV	GAGGTT	1746	125	0.0715922	1552	0.240478
TW	ACCTGG	1383	99	0.0715835	1553	0
LD	CTGGAC	6254	447	0.0714743	1554	0.235388
MA	ATGGCG	686	49	0.0714286	1555	0.698799
NA	AACGCT	602	43	0.0714286	1556	0.232173
YQ	TATCAA	658	47	0.0714286	1557	1.05772
KG	AAGGGG	1555	111	0.0713826	1558	0.635109
RP	AGGCCC	1079	77	0.0713624	1559	1.13884
IN	ATAAAT	911	65	0.0713502	1560	0.825776
RS	AGGTCC	701	50	0.0713267	1561	1.06253
GA	GGCGCC	1066	76	0.0712946	1562	0.590474
ID	ATTGAT	2654	189	0.0712133	1563	0.296543
IG	ATAGGC	520	37	0.0711538	1564	0.860275
QR	CAGCGG	2052	146	0.0711501	1565	0.618059
PG	CCGGGC	914	65	0.071116	1566	0.0211531
VH	GTGCAC	1928	137	0.0710581	1567	0.835169
EV	GAGGTA	1239	88	0.071025	1568	0.229002
EA	GAGGCC	5323	378	0.0710126	1569	0
PS	CCAAGT	1197	85	0.0710109	1570	0.903002
CA	TGTGCC	1817	129	0.0709961	1571	1.12562
VV	GTTGTT	1155	82	0.0709957	1572	1.12806
CS	TGTAGC	592	42	0.0709459	1573	0.774881
IL	ATACTA	282	20	0.070922	1574	1.20407
TS	ACGAGT	282	20	0.070922	1575	2.06807
RQ	CGACAG	989	70	0.0707786	1576	1.52772
SP	TCCCCC	1187	84	0.0707666	1577	0.328638
WL	TGGCTA	523	37	0.0707457	1578	1.02362
TM	ACTATG	707	50	0.0707214	1579	0.481682
RS	AGATCT	693	49	0.0707071	1580	1.04994
WT	TGGACC	962	68	0.0706861	1581	0.431009
AR	GCCCGG	1882	133	0.0706695	1582	0.788994
SS	AGTTCC	1118	79	0.0706619	1583	1.33235
RP	CGCCCA	552	39	0.0706522	1584	1.12441
EV	GAGGTC	2436	172	0.0706076	1585	0.220497
TG	ACCGGA	496	35	0.0705645	1586	0.808304
IA	ATCGCG	312	22	0.0705128	1587	1.40227
WC	TGGTGT	610	43	0.0704918	1588	0
PM	CCTATG	823	58	0.0704739	1589	0.11364
CT	TGCACC	1121	79	0.0704728	1590	0.845636
AC	GCGTGC	298	21	0.0704698	1591	0.891405
RW	CGCTGG	1150	81	0.0704348	1592	0.576154
NQ	AATCAA	1136	80	0.0704225	1593	0.938274
RR	CGTCGA	213	15	0.0704225	1594	1.83243
PL	CCACTT	966	68	0.0703934	1595	1.23602
MR	ATGCGC	682	48	0.0703812	1596	0.355132
KI	AAGATC	3808	268	0.0703782	1597	1.19846
MR	ATGCGG	782	55	0.0703325	1598	0.354132
SA	TCTGCA	2263	159	0.0702607	1599	1.4222
RP	AGACCC	840	59	0.0702381	1600	1.11593
CV	TGCGTC	285	20	0.0701754	1601	0.820552
FR	TTCAGG	1241	87	0.0701048	1602	0.762591
NV	AACGTC	799	56	0.0700876	1603	0.236964
PG	CCGGGT	371	26	0.0700809	1604	0
AF	GCGTTT	471	33	0.0700637	1605	1.2393
AR	GCTCGC	614	43	0.0700326	1606	0.775932
VA	GTTGCA	1086	76	0.0699816	1607	0.683461
TS	ACATCC	1129	79	0.0699734	1608	2.04865
RK	AGGAAG	3430	240	0.0699708	1609	1.15504
SP	TCGCCT	415	29	0.0698795	1610	0.310438
WR	TGGCGG	458	32	0.069869	1611	0.189365
TA	ACGGCG	315	22	0.0698413	1612	1.22631
RP	CGGCCC	1303	91	0.0698388	1613	1.10771
PM	CCGATG	401	28	0.0698254	1614	0.100304
CL	TGTCTG	1248	87	0.0697115	1615	0.722326
RQ	CGTCAG	689	48	0.0696662	1616	1.50486
AL	GCACTG	2613	182	0.0696517	1617	0.880566
HN	CATAAC	675	47	0.0696296	1618	0.859364
AA	GCGGCC	1509	105	0.0695825	1619	1.20145
QS	CAGTCG	575	40	0.0695652	1620	1.333
VS	GTCTCA	877	61	0.0695553	1621	1.52188
PC	CCGTGT	331	23	0.0694864	1622	0.845366
RL	CGACTT	403	28	0.0694789	1623	1.18614
HS	CATTCC	910	63	0.0692308	1624	1.77316
MG	ATGGGG	1199	83	0.0692244	1625	0.69671
SP	TCCCCG	867	60	0.0692042	1626	0.296427
ES	GAAAGT	2067	143	0.0691824	1627	0.227606
CL	TGTCTA	347	24	0.0691643	1628	0.710955
QT	CAGACG	1056	73	0.0691288	1629	0.815024
VA	GTCGCA	246	17	0.0691057	1630	0.66529
PP	CCTCCA	3272	226	0.0690709	1631	0.848483
RG	CGCGGG	333	23	0.0690691	1632	0.937417
AL	GCGCTG	1840	127	0.0690217	1633	0.867457
RG	CGCGGT	145	10	0.0689655	1634	0.935253
WH	TGGCAT	638	44	0.0689655	1635	0
QR	CAGCGC	1814	125	0.0689085	1636	0.571875
TG	ACAGGG	1525	105	0.0688525	1637	0.77287
VS	GTGTCA	1337	92	0.0688108	1638	1.50635
IL	ATATTG	393	27	0.0687023	1639	1.1582
SM	TCTATG	801	55	0.0686642	1640	0.874469
YR	TATCGT	204	14	0.0686275	1641	0.927649
KS	AAATCG	277	19	0.0685921	1642	0.973045
IT	ATAACC	496	34	0.0685484	1643	1.13731
LA	TTAGCG	146	10	0.0684932	1644	2.52442
WA	TGGGCT	1008	69	0.0684524	1645	0.135532
LP	CTTCCA	1593	109	0.0684244	1646	1.19243
RR	CGTAGG	190	13	0.0684211	1647	1.79083
GF	GGATTT	1374	94	0.0684134	1648	0.532435
RP	AGGCCT	1155	79	0.0683983	1649	1.07764
AL	GCGCTC	819	56	0.0683761	1650	0.853898
PA	CCTGCG	702	48	0.0683761	1651	1.24412
SR	TCTCGT	351	24	0.0683761	1652	1.66361
HT	CATACC	600	41	0.0683333	1653	1.82917
IT	ATAACA	659	45	0.0682853	1654	1.13177
TR	ACCCGG	952	65	0.0682773	1655	1.11777
PP	CCTCCG	923	63	0.0682557	1656	0.831355
TV	ACAGTC	1363	93	0.0682318	1657	0.953137
AG	GCGGGT	352	24	0.0681818	1658	1.05424
FG	TTCGGT	352	24	0.0681818	1659	0
HR	CATCGA	440	30	0.0681818	1660	1.80625
FA	TTCGCA	367	25	0.0681199	1661	0.938001
SN	AGTAAT	925	63	0.0681081	1662	0.331727
PR	CCTCGC	602	41	0.0681063	1663	0.494097
CA	TGTGCT	1441	98	0.0680083	1664	1.06359
NV	AACGTG	1603	109	0.0679975	1665	0.193287
WT	TGGACT	809	55	0.0679852	1666	0.374803
DA	GACGCT	839	57	0.067938	1667	0.0815233
WS	TGGTCT	707	48	0.0678925	1668	0.509167
AQ	GCACAA	987	67	0.0678825	1669	0.845365
GA	GGCGCT	619	42	0.0678514	1670	0.51906
NA	AACGCC	1047	71	0.0678128	1671	0.15723
EQ	GAACAA	2168	147	0.0678044	1672	0.364273
SS	TCTTCG	354	24	0.0677966	1673	1.27264
SW	TCCTGG	1623	110	0.0677757	1674	0.50506
PT	CCAACG	310	21	0.0677419	1675	0.345404
PM	CCAATG	1019	69	0.0677134	1676	0.0559938
RA	CGGGCT	990	67	0.0676768	1677	0.832933
HA	CATGCA	1301	88	0.0676403	1678	1.27777
LS	CTTTCG	207	14	0.0676328	1679	1.82936
NG	AACGGG	843	57	0.0676157	1680	0.255469
GC	GGGTGC	355	24	0.0676056	1681	0
RA	CGAGCC	1213	82	0.067601	1682	0.831317
YP	TACCCC	1036	70	0.0675676	1683	0.25946
VS	GTCTCT	1466	99	0.0675307	1684	1.47926
PY	CCATAT	859	58	0.0675204	1685	0.485234
AL	GCATTA	548	37	0.0675182	1686	0.835684
PR	CCTAGA	489	33	0.0674847	1687	0.480868
RA	CGCGCA	163	11	0.0674847	1688	0.828832
SE	TCAGAG	3586	242	0.0674847	1689	0
SP	AGTCCG	252	17	0.0674603	1690	0.259607
IP	ATCCCG	623	42	0.0674157	1691	0.709142
RR	CGTCGT	178	12	0.0674157	1692	1.76948
TS	ACATCG	282	19	0.0673759	1693	1.99407
DF	GATTTC	1813	122	0.0672918	1694	0.463037
PA	CCCGCA	461	31	0.0672451	1695	1.22006
NV	AACGTA	238	16	0.0672269	1696	0.176843
PV	CCAGTG	2681	180	0.0671391	1697	0.447332
AT	GCGACG	149	10	0.0671141	1698	0.973124
SY	TCGTAT	149	10	0.0671141	1699	0.941963
AS	GCCTCA	1729	116	0.0670908	1700	0.712408
PY	CCGTAC	507	34	0.0670611	1701	0.475388
TT	ACAACC	865	58	0.067052	1702	0.927973
AL	GCGTTG	358	24	0.0670391	1703	0.82541
RG	CGGGGG	418	28	0.0669856	1704	0.89323
PV	CCTGTT	1702	114	0.06698	1705	0.443909
IP	ATTCCT	1852	124	0.0669546	1706	0.699241
WG	TGGGGG	493	33	0.0669371	1707	0.792923
VC	GTTTGC	494	33	0.0668016	1708	1.67497
AV	GCGGTG	1243	83	0.0667739	1709	0.643865
AV	GCCGTT	390	26	0.0666667	1710	0.641546
CA	TGCGCG	165	11	0.0666667	1711	1.03484
LP	TTACCA	810	54	0.0666667	1712	1.15489
PR	CCACGT	300	20	0.0666667	1713	0.463274
RY	CGTTAC	345	23	0.0666667	1714	0.903324
SP	TCCCCA	2131	142	0.0666354	1715	0.241857
SP	TCCCCT	1656	110	0.0664251	1716	0.237297
NL	AACCTC	2577	171	0.0663562	1717	0.713158
CR	TGCAGG	935	62	0.0663102	1718	0.439403
QL	CAGCTA	1750	116	0.0662857	1719	1.02568
NL	AACCTT	1539	102	0.0662768	1720	0.711431
LP	TTACCT	830	55	0.0662651	1721	1.14617
CC	TGTTGT	317	21	0.0662461	1722	0.381659
CM	TGCATG	1314	87	0.06621	1723	0
VR	GTGAGG	1451	96	0.0661613	1724	0.982595
LD	CTTGAC	1436	95	0.066156	1725	0.123836
RR	CGACGC	257	17	0.0661479	1726	1.74209
PP	CCACCG	802	53	0.0660848	1727	0.784723
SA	TCTGCG	560	37	0.0660714	1728	1.33351
TG	ACTGGA	2635	174	0.0660342	1729	0.712574
RV	CGCGTT	91	6	0.0659341	1730	1.62149
PR	CCCCGG	1259	83	0.0659253	1731	0.447141
ME	ATGGAA	3641	240	0.065916	1732	0.00829945
LK	CTGAAG	7619	502	0.0658879	1733	1.05879
LN	TTGAAT	1306	86	0.0658499	1734	0.782356
RR	CGACGG	319	21	0.0658307	1735	1.73516
RM	CGAATG	714	47	0.0658263	1736	0.704165
II	ATCATC	3785	249	0.065786	1737	0.376368
TL	ACTCTT	1019	67	0.0657507	1738	0.752388
RS	AGGTCG	198	13	0.0656566	1739	0.943028
RW	CGGTGG	442	29	0.0656109	1740	0.473801
TS	ACTTCG	244	16	0.0655738	1741	1.95496
LE	TTAGAA	1983	130	0.0655572	1742	0.675172
LE	TTAGAG	1495	98	0.0655518	1743	0.675053
ME	ATGGAG	5020	329	0.0655378	1744	0
RV	CGTGTC	565	37	0.0654867	1745	1.61167
LI	CTGATA	810	53	0.0654321	1746	0.344127
RS	CGGTCG	107	7	0.0654206	1747	0.937833
KN	AAGAAC	4051	265	0.0654159	1748	0.727888
RL	CGTCTT	367	24	0.0653951	1749	1.09875
IT	ATAACT	566	37	0.065371	1750	1.06884
AA	GCTGCA	3154	206	0.0653139	1751	1.11011
RH	CGTCAC	383	25	0.0652742	1752	0.639245
VL	GTGCTA	982	64	0.0651731	1753	0.588894
RG	CGAGGC	1090	71	0.0651376	1754	0.852869
PM	CCCATG	2395	156	0.0651357	1755	0
QA	CAAGCG	384	25	0.0651042	1756	0.251187
RN	CGCAAT	461	30	0.0650759	1757	0.408765
VM	GTAATG	584	38	0.0650685	1758	0.226133
PT	CCTACC	1046	68	0.0650096	1759	0.286007
NR	AACAGA	1723	112	0.0650029	1760	0
RL	CGGCTT	677	44	0.0649926	1761	1.08984
YA	TACGCA	431	28	0.0649652	1762	0.335919
IV	ATAGTA	385	25	0.0649351	1763	1.1426
VG	GTCGGT	231	15	0.0649351	1764	0.905449
PV	CCTGTG	4129	268	0.0649068	1765	0.398547
GS	GGCAGT	2143	139	0.0648623	1766	0.0491872
PK	CCCAAA	2606	169	0.0648503	1767	0.00238695
ID	ATCGAC	1404	91	0.0648148	1768	0.16072
LP	TTACCC	494	32	0.0647773	1769	1.11341
RL	CGACTC	494	32	0.0647773	1770	1.08506
PK	CCAAAA	1421	92	0.0647431	1771	0
VH	GTTCAT	1035	67	0.0647343	1772	0.7007
RT	CGAACT	371	24	0.06469	1773	1.39477
IN	ATAAAC	804	52	0.0646766	1774	0.684104
YR	TACAGG	1206	78	0.0646766	1775	0.842108
RS	AGGTCA	727	47	0.0646492	1776	0.920722
YP	TACCCT	1176	76	0.0646258	1777	0.19524
SS	TCTTCC	1919	124	0.064617	1778	1.20334
VL	GTTTTG	1068	69	0.0646067	1779	0.576302
QT	CAGACT	2198	142	0.0646042	1780	0.717365
LM	TTAATG	774	50	0.0645995	1781	0.515673
AL	GCTCTC	1642	106	0.0645554	1782	0.770945
SG	TCAGGA	1859	120	0.0645508	1783	1.45597
TT	ACAACG	279	18	0.0645161	1784	0.872352
TV	ACCGTA	217	14	0.0645161	1785	0.872352
II	ATTATC	946	61	0.064482	1786	0.347485
VT	GTGACA	2234	144	0.0644584	1787	0.974004
PT	CCTACA	978	63	0.0644172	1788	0.2728
VT	GTCACC	2672	172	0.0643713	1789	0.972052
SC	TCGTGT	202	13	0.0643564	1790	1.29395
NT	AACACT	1585	102	0.0643533	1791	0.341197
TE	ACCGAA	513	33	0.0643275	1792	0
TR	ACCCGT	342	22	0.0643275	1793	1.0318
CT	TGTACT	560	36	0.0642857	1794	0.713067
CS	TGCTCT	949	61	0.0642782	1795	0.63249
SL	TCGTTA	109	7	0.0642202	1796	1.4269
DA	GACGCA	623	40	0.0642055	1797	0
SS	TCTTCT	1963	126	0.0641875	1798	1.19371
TA	ACTGCA	1901	122	0.0641767	1799	1.10428
QH	CAGCAT	2104	135	0.0641635	1800	0.278397
IP	ATTCCG	265	17	0.0641509	1801	0.637527
CS	TGTTCA	608	39	0.0641447	1802	0.629492
TR	ACAAGA	951	61	0.064143	1803	1.02765
HR	CATAGG	312	20	0.0641026	1804	1.71725
WA	TGGGCA	936	60	0.0641026	1805	0.0408132
SL	TCTCTT	1217	78	0.064092	1806	1.42402
TC	ACTTGC	562	36	0.0640569	1807	0.800167
NL	AACCTA	890	57	0.0640449	1808	0.662011
YM	TACATG	2108	135	0.0640417	1809	0
PR	CCCCGT	406	26	0.0640394	1810	0.405268
PR	CCTAGG	406	26	0.0640394	1811	0.405268
VT	GTTACC	703	45	0.0640114	1812	0.963964
HH	CATCAC	953	61	0.0640084	1813	1.06297
CK	TGTAAA	1266	81	0.063981	1814	0.910987
TS	ACTTCC	1110	71	0.063964	1815	1.9191
SV	AGCGTA	172	11	0.0639535	1816	1.15172
IV	ATAGTC	438	28	0.0639269	1817	1.12003
RS	CGGAGT	579	37	0.0639033	1818	0.903979
YK	TATAAA	1409	90	0.0638751	1819	0.727515
LI	TTGATT	940	60	0.0638298	1820	0.308358
LS	TTATCG	94	6	0.0638298	1821	1.74587
TA	ACAGCA	2241	143	0.0638108	1822	1.09603
EF	GAGTTC	3197	204	0.0638098	1823	0.368002
CH	TGCCAC	1192	76	0.0637584	1824	0.381023
SV	AGTGTG	2620	167	0.0637405	1825	1.14691
VH	GTGCAT	1083	69	0.0637119	1826	0.677733
QA	CAAGCC	1962	125	0.0637105	1827	0.219968
RC	CGATGC	314	20	0.0636943	1828	0.869658
LA	TTAGCA	895	57	0.0636872	1829	2.41946
DH	GACCAT	1588	101	0.063602	1830	0
AV	GCTGTA	1274	81	0.0635793	1831	0.573137
KS	AAGTCG	582	37	0.0635739	1832	0.863438
PY	CCTTAT	1007	64	0.0635551	1833	0.397919
WK	TGGAAA	1637	104	0.0635308	1834	0
IA	ATCGCA	646	41	0.0634675	1835	1.2504
RM	CGCATG	1103	70	0.0634633	1836	0.651423
FD	TTCGAC	883	56	0.0634202	1837	0
PA	CCAGCG	615	39	0.0634146	1838	1.13545
NC	AATTGT	521	33	0.0633397	1839	0.426551
QA	CAGGCC	4503	285	0.0632911	1840	0.21044
PP	CCTCCT	3429	217	0.0632838	1841	0.72224
TL	ACACTC	1059	67	0.0632672	1842	0.69684
SV	TCCGTC	490	31	0.0632653	1843	1.13611
PT	CCTACG	253	16	0.0632411	1844	0.246218
QT	CAGACC	2815	178	0.0632327	1845	0.686408
VR	GTCAGG	870	55	0.0632184	1846	0.916952
PT	CCAACA	1251	79	0.0631495	1847	0.244126
ST	TCTACC	998	63	0.0631263	1848	1.84727
VT	GTGACG	746	47	0.0630027	1849	0.941049
TV	ACAGTG	2889	182	0.0629976	1850	0.837989
RC	CGATGT	270	17	0.062963	1851	0.852998
PA	CCGGCA	429	27	0.0629371	1852	1.12454
VL	GTGCTG	5499	346	0.0629205	1853	0.538148
TA	ACAGCT	2384	150	0.0629195	1854	1.07574
RP	CGCCCT	493	31	0.0628803	1855	0.956285
QC	CAGTGC	1988	125	0.0628773	1856	1.17479
PR	CCCAGG	1623	102	0.0628466	1857	0.378142
IR	ATCCGA	1259	79	0.0627482	1858	1.37786
WA	TGGGCG	255	16	0.0627451	1859	0.00993392
FR	TTCCGG	1546	97	0.0627426	1860	0.602523
GS	GGCAGC	3653	229	0.0626882	1861	0
MR	ATGCGT	351	22	0.0626781	1862	0.187902
PR	CCGAGG	351	22	0.0626781	1863	0.374269
LG	CTCGGA	399	25	0.0626566	1864	0.763138
RQ	AGACAA	927	58	0.0625674	1865	1.34982
HR	CATCGG	576	36	0.0625	1866	1.68072
PL	CCTCTC	1456	91	0.0625	1867	1.06443
RC	CGTTGT	224	14	0.0625	1868	0.84235
SW	TCTTGG	689	43	0.0624093	1869	0.386052
RA	CGGGCC	1539	96	0.0623782	1870	0.715314
SR	AGTCGG	497	31	0.0623742	1871	1.53107
VV	GTAGTA	449	28	0.0623608	1872	0.940972
NF	AATTTT	1331	83	0.0623591	1873	0.259027
HW	CACTGG	1396	87	0.0623209	1874	0
HN	CATAAT	690	43	0.0623188	1875	0.699331
SN	TCCAAT	1380	86	0.0623188	1876	0.203569
WA	TGGGCC	1348	84	0.0623145	1877	0
VT	GTCACT	1782	111	0.0622896	1878	0.924626
QT	CAAACC	867	54	0.0622837	1879	0.664593
YP	TACCCG	498	31	0.062249	1880	0.141179
KS	AAGTCT	2365	147	0.0621564	1881	0.830908
CC	TGCTGC	1143	71	0.0621172	1882	0.288818
VY	GTGTAC	1788	111	0.0620805	1883	0.955181
RR	CGACGT	145	9	0.062069	1884	1.65027
SP	AGCCCC	2322	144	0.0620155	1885	0.138197
NS	AACAGT	1936	120	0.0619835	1886	0.247443
NH	AACCAT	1307	81	0.061974	1887	0
LP	CTTCCT	2115	131	0.0619385	1888	1.04876
VR	GTCCGG	856	53	0.0619159	1889	0.886918
KK	AAGAAG	9646	597	0.0618909	1890	0.771549
SN	TCTAAC	808	50	0.0618812	1891	0.193402
PF	CCTTTC	1471	91	0.0618627	1892	0.573511
EH	GAGCAT	1924	119	0.0618503	1893	0
VT	GTAACG	178	11	0.0617978	1894	0.91319
FS	TTTTCC	1149	71	0.0617929	1895	1.34733
LG	CTTGGG	1298	80	0.0616333	1896	0.73938
VG	GTGGGG	1704	105	0.0616197	1897	0.829843
TA	ACAGCG	634	39	0.0615142	1898	1.04315
SP	AGCCCT	2295	141	0.0614379	1899	0.124697
VY	GTGTAT	1335	82	0.0614232	1900	0.939824
VS	GTATCG	114	7	0.0614035	1901	1.34204
VA	GTGGCG	945	58	0.0613757	1902	0.494152
YC	TACTGC	1516	93	0.0613456	1903	0.184993
FM	TTCATG	2447	150	0.0612996	1904	0
WR	TGGCGC	408	25	0.0612745	1905	0
ES	GAGAGT	2597	159	0.0612245	1906	0.0513098
FA	TTTGCG	441	27	0.0612245	1907	0.784034
IL	ATATTA	343	21	0.0612245	1908	0.991948
IT	ATAACG	147	9	0.0612245	1909	0.974299
VK	GTAAAA	1176	72	0.0612245	1910	0.508081
PL	CCTCTG	2909	178	0.0611894	1911	1.03386
DS	GACAGC	4218	258	0.0611664	1912	0.109795
PT	CCGACA	278	17	0.0611511	1913	0.197733
CG	TGCGGT	229	14	0.0611354	1914	0.839636
KS	AAGTCC	2290	140	0.0611354	1915	0.807011
AL	GCTTTA	867	53	0.0611303	1916	0.692295
AV	GCTGTT	2045	125	0.0611247	1917	0.516336
CG	TGTGGC	2357	144	0.0610946	1918	0.838674
RL	CGTCTG	901	55	0.0610433	1919	0.999399
LE	CTTGAA	2015	123	0.0610422	1920	0.572223
QA	CAGGCT	3555	217	0.0610408	1921	0.15821
RR	CGAAGG	639	39	0.0610329	1922	1.62598
CQ	TGTCAG	1377	84	0.0610022	1923	0.844232
FS	TTTTCG	164	10	0.0609756	1924	1.32812
VS	GTCTCG	328	20	0.0609756	1925	1.33195
CR	TGCAGA	853	52	0.0609613	1926	0.318067
EK	GAGAAA	6884	419	0.0608658	1927	0
AP	GCCCCT	2136	130	0.0608614	1928	0.643003
PS	CCAAGC	1216	74	0.0608553	1929	0.680344
NA	AACGCG	296	18	0.0608108	1930	0
TQ	ACGCAA	181	11	0.0607735	1931	1.01487
VQ	GTTCAG	2090	127	0.0607656	1932	0.8212
NS	AACTCA	1333	81	0.0607652	1933	0.218804
TV	ACTGTT	1301	79	0.0607225	1934	0.784924
LD	CTCGAC	560	34	0.0607143	1935	0
HE	CACGAA	659	40	0.060698	1936	0.264455
KA	AAGGCG	1022	62	0.0606654	1937	0.990167
IS	ATATCG	99	6	0.0606061	1938	1.23497
PC	CCGTGC	330	20	0.0606061	1939	0.648097
PR	CCGCGT	99	6	0.0606061	1940	0.32577
PV	CCAGTT	1386	84	0.0606061	1941	0.299641
TA	ACTGCG	429	26	0.0606061	1942	1.0217
VL	GTATTA	330	20	0.0606061	1943	0.484079
VT	GTAACT	627	38	0.0606061	1944	0.885098
VT	GTTACG	132	8	0.0606061	1945	0.885098
EV	GAGGTG	5264	319	0.0606003	1946	0
FH	TTTCAC	843	51	0.0604982	1947	0.32732
MN	ATGAAT	1835	111	0.0604905	1948	0.15191
SS	TCGTCG	182	11	0.0604396	1949	1.10692
LN	CTCAAT	1787	108	0.0604365	1950	0.658594
IL	ATACTC	331	20	0.060423	1951	0.972936
RV	CGTGTG	1193	72	0.0603521	1952	1.49387
LS	TTATCT	647	39	0.0602782	1953	1.66327
RS	AGATCA	614	37	0.0602606	1954	0.819303
SY	AGTTAC	863	52	0.0602549	1955	0.786427
SR	TCGAGG	249	15	0.060241	1956	1.48087
LW	CTGTGG	2009	121	0.060229	1957	0.635434
TT	ACAACA	1164	70	0.0601375	1958	0.770956
LI	CTTATA	416	25	0.0600962	1959	0.221401
SN	TCAAAT	1115	67	0.0600897	1960	0.151018
RP	AGACCA	983	59	0.0600203	1961	0.889128
PR	CCGCGA	100	6	0.06	1962	0.311271
SP	TCGCCC	550	33	0.06	1963	0.0905309
MM	ATGATG	2551	153	0.0599765	1964	0
LM	CTTATG	767	46	0.0599739	1965	0.408486
VH	GTACAC	517	31	0.0599613	1966	0.590202
PR	CCCAGA	1218	73	0.0599343	1967	0.30969
DT	GACACA	2720	163	0.0599265	1968	0.366758
QT	CAGACA	2720	163	0.0599265	1969	0.608931
SV	TCCGTG	1135	68	0.0599119	1970	1.05754
PA	CCAGCA	2437	146	0.0599097	1971	1.05342
IF	ATATTT	1152	69	0.0598958	1972	1.05754
TL	ACACTA	568	34	0.0598592	1973	0.616953
RS	CGAAGC	702	42	0.0598291	1974	0.808935
RL	CGGTTG	418	25	0.0598086	1975	0.96992
PV	CCTGTC	2157	129	0.0598053	1976	0.280452
YL	TACTTA	602	36	0.0598007	1977	0.638878
PV	CCGGTG	970	58	0.0597938	1978	0.280175
AP	GCCCCC	1656	99	0.0597826	1979	0.617201
SG	TCGGGA	435	26	0.0597701	1980	1.34496
CY	TGTTAC	569	34	0.059754	1981	0.105103
RA	CGCGCC	569	34	0.059754	1982	0.653307
YT	TACACC	1574	94	0.0597205	1983	0.681319
KS	AAATCT	1641	98	0.0597197	1984	0.77321
TQ	ACGCAG	838	50	0.0596659	1985	0.988332
IG	ATCGGG	671	40	0.0596125	1986	0.604949
PL	CCACTA	537	32	0.0595903	1987	0.995654
RT	CGGACT	571	34	0.0595447	1988	1.27519
AH	GCACAT	840	50	0.0595238	1989	0.807355
SN	TCCAAC	2034	121	0.0594887	1990	0.136516
NV	AACGTT	454	27	0.0594714	1991	0
RT	CGTACC	286	17	0.0594406	1992	1.27267
LN	CTAAAT	859	51	0.0593714	1993	0.632941
LE	CTGGAA	5710	339	0.0593695	1994	0.532139
SV	TCTGTA	1011	60	0.0593472	1995	1.04388
RI	AGAATT	1485	88	0.0592593	1996	0.359683
TS	ACATCT	1485	88	0.0592593	1997	1.80888
TV	ACAGTT	1301	77	0.0591852	1998	0.74793
[truncated: 1,723 more rows]

## Sheet: Supplemental Table S3
Supplemental Table S3: Transcripts with prominent ('deterministic') disome peaks.
proteasome
selenoprotein
ribosomal protein (cytoplasmic)
ribosomal protein (mitochondrial)
histone
known pause site from literature
Gene name	Transcript	Gene/transcript identification	position of pause site		normalised footprint number at pause site, by size				Ratio and percentages of footprint populations
			(CDS codon/amin acid)	pause site strength	59mer	60mer	62mer	63mer	ratio (59+60)/(62+63)	%59-60mer	%62-63mer
Mgst1	Mgst1-201	ENSMUSG00000008540|ENSMUST00000008684	56	2319.95	240020	588932	46075.2	127101	4.78676	82.7192	17.2808
Bhmt	Bhmt-201	ENSMUSG00000074768|ENSMUST00000099309	199	1941.56	6062.06	2781.38	31915.9	14142	0.192007	16.1079	83.8921
Selenok	Selenok-201	ENSMUSG00000042682|ENSMUST00000112268	91	1518.88	1808.25	8716.23	639.02	2181.04	3.73201	78.8673	21.1327
Mup16	Mup16-202	ENSMUSG00000078675|ENSMUST00000107483	18	1341.1	136654	231269	15141.8	27067.2	8.71668	89.7084	10.2916
Fh1	Fh1-201	ENSMUSG00000026526|ENSMUST00000027810	55	1204.94	11901.1	1318.85	2135.27	117.2	5.86911	85.4421	14.5579
Bdh1	Bdh1-201	ENSMUSG00000046598|ENSMUST00000089759	21	1204.48	5872.08	1975.74	3610.79	1209.39	1.62812	61.95	38.05
Tmem176a	Tmem176a-201	ENSMUSG00000023367|ENSMUST00000101426	231	1191.1	5439.63	5767.11	3855.98	4359.76	1.36406	57.6998	42.3002
Pah	Pah-201	ENSMUSG00000020051|ENSMUST00000020241	252	1179.38	72823.3	8713.64	1792.36	1147.15	27.7383	96.5203	3.47968
Bhmt	Bhmt-201	ENSMUSG00000074768|ENSMUST00000099309	198	1116.09	11010.1	15960.8	1646.32	1837.95	7.74075	88.5593	11.4407
Hagh	Hagh-202	ENSMUSG00000024158|ENSMUST00000118788	112	1052.93	8326.26	8981.58	417.04	665.34	15.9905	94.1144	5.88563
Phb	Phb-204	ENSMUSG00000038845|ENSMUST00000125172	143	839.811	1562.23	6014.41	181.78	445.98	12.0693	92.3485	7.6515
Mrpl13	Mrpl13-205	ENSMUSG00000022370|ENSMUST00000172387	132	789.54	1281.51	1722.43	418.1	333.14	3.99864	79.9946	20.0054
Aldh1a1	Aldh1a1-201	ENSMUSG00000053279|ENSMUST00000087638	403	728.603	5143.19	12026.8	8034.26	13901.5	0.782738	43.9065	56.0935
Msrb1	Msrb1-201	ENSMUSG00000075705|ENSMUST00000101800	19	727.208	20853.8	10666.6	2038.73	1461.13	9.00618	90.0062	9.99383
Gm4951	Gm4951-201	ENSMUSG00000073555|ENSMUST00000031549	127	723.099	1159.05	1273.48	1179.2	935.19	1.15046	53.4984	46.5016
Rps5	Rps5-202	ENSMUSG00000012848|ENSMUST00000108539	32	721.731	4292.12	2985.27	1197.84	953.44	3.38282	77.1836	22.8164
Rpl35a	Rpl35a-201	ENSMUSG00000060636|ENSMUST00000078804	44	720.609	15654.4	1742.29	4426.1	1135.32	3.12809	75.7757	24.2243
Acox2	Acox2-204	ENSMUSG00000021751|ENSMUST00000164598	583	702.148	2510.13	1020.94	1186.02	838.76	1.74393	63.5559	36.4441
Gm4951	Gm4951-201	ENSMUSG00000073555|ENSMUST00000031549	318	696.825	1167.18	2198.71	465.11	582.64	3.21249	76.2611	23.7389
Aldh1a7	Aldh1a7-201	ENSMUSG00000024747|ENSMUST00000025656	403	638.271	1059.05	2263.75	1103.39	1767.88	1.15726	53.6449	46.3551
Psma5	Psma5-201	ENSMUSG00000068749|ENSMUST00000090569	104	638.214	334.6	526.67	3414.54	1798.48	0.165215	14.1789	85.8211
Mup7	Mup7-203	ENSMUSG00000073842|ENSMUST00000166098	18	614.53	102758	327649	44153.7	62598.7	4.03182	80.1265	19.8735
Ndufs5	Ndufs5-203	ENSMUSG00000028648|ENSMUST00000106207	48	612.52	4957.68	1061.09	559.86	95.87	9.17873	90.1756	9.82441
Deptor	Deptor-202	ENSMUSG00000022419|ENSMUST00000096433	229	608.565	1422.2	2306.79	92.81	307.47	9.31595	90.3063	9.69372
Mrps17	Mrps17-203	ENSMUSG00000034211|ENSMUST00000119576	61	605.122	2547.31	1175.97	207.21	52.28	14.3485	93.4847	6.51531
Slc25a5	Slc25a5-201	ENSMUSG00000016319|ENSMUST00000016463	248	604.572	3702.49	1342.46	881.57	17286.2	0.277687	21.7336	78.2664
Selenos	Selenos-201	ENSMUSG00000075701|ENSMUST00000101801	188	602.488	2820.39	840.91	30.77	30.56	59.6984	98.3525	1.64749
Nqo2	Nqo2-202	ENSMUSG00000046949|ENSMUST00000058978	153	602.04	2337.33	1731.83	420.05	257.09	6.00933	85.7333	14.2667
Aldh3a2	Aldh3a2-202	ENSMUSG00000010025|ENSMUST00000074127	232	590.291	3579.12	1063.54	22.78	7.25	154.601	99.3573	0.64267
Scp2	Scp2-201	ENSMUSG00000028603|ENSMUST00000030340	311	577.768	75235.4	31185.8	5810.95	2489.25	12.8215	92.7649	7.23509
Lifr	Lifr-201	ENSMUSG00000054263|ENSMUST00000067190	78	568.528	3651.97	3373.46	435.29	435.16	8.07103	88.9759	11.0241
Slco1b2	Slco1b2-201	ENSMUSG00000030236|ENSMUST00000042812	301	562.878	8058.22	5914.23	8349.25	3104.82	1.21987	54.9523	45.0477
1300017J02Rik	1300017J02Rik-201	ENSMUSG00000033688|ENSMUST00000035163	42	554.638	2354.53	2240.48	7649.22	6711.57	0.319969	24.2407	75.7593
Ndufab1	Ndufab1-203	ENSMUSG00000030869|ENSMUST00000123296	91	540.225	311.07	435.85	1918.47	4649.23	0.113726	10.2113	89.7887
Ces2c	Ces2c-201	ENSMUSG00000061825|ENSMUST00000055052	364	520.397	1182.16	1235.67	34.54	40.49	32.2248	96.9902	3.0098
Uqcrc1	Uqcrc1-201	ENSMUSG00000025651|ENSMUST00000026743	266	513.908	2493.4	3713.72	1090.1	1469.92	2.42464	70.7998	29.2002
Acat3	Acat3-201	ENSMUSG00000062480|ENSMUST00000043923	308	505.986	25.19	21.46	243.83	2464.73	0.0172232	1.69316	98.3068
Rdx	Rdx-201	ENSMUSG00000032050|ENSMUST00000000590	96	505.843	163.42	515.51	888.32	2237.03	0.217233	17.8465	82.1535
Nars	Nars-201	ENSMUSG00000024587|ENSMUST00000025483	485	502.702	607.09	902.01	723.58	560.59	1.17516	54.0263	45.9737
Gne	Gne-201	ENSMUSG00000028479|ENSMUST00000030201	217	498.991	747.07	401.1	1149.55	474.61	0.706932	41.4153	58.5847
Tuba4a	Tuba4a-202	ENSMUSG00000026202|ENSMUST00000186213	218	491.223	381.8	100.12	2797.05	2858.46	0.0852125	7.85215	92.1479
Slco1a1	Slco1a1-202	ENSMUSG00000041698|ENSMUST00000168119	197	479.088	1351.24	3718.42	757.39	2068.32	1.79412	64.2105	35.7895
Ndufb6	Ndufb6-201	ENSMUSG00000071014|ENSMUST00000095128	41	472.639	2687.82	4545.69	953.14	1581.53	2.85383	74.0518	25.9482
Scp2	Scp2-201	ENSMUSG00000028603|ENSMUST00000030340	149	471.802	4944.79	15970.7	25848.6	49524.1	0.277494	21.7217	78.2783
Tdo2	Tdo2-201	ENSMUSG00000028011|ENSMUST00000029645	166	470.148	5871.94	12365.2	12277.9	22592.9	0.522991	34.3397	65.6603
Ces2c	Ces2c-201	ENSMUSG00000061825|ENSMUST00000055052	30	463.36	71.81	70.86	1126.76	1114.19	0.063665	5.98543	94.0146
Abhd14b	Abhd14b-201	ENSMUSG00000042073|ENSMUST00000048527	193	455.272	3005.54	2758.69	657.88	690.31	4.27553	81.0446	18.9554
Ehhadh	Ehhadh-201	ENSMUSG00000022853|ENSMUST00000023559	18	448.313	1280.15	1840.03	402.78	1022.64	2.18895	68.6418	31.3582
Adtrp	Adtrp-201	ENSMUSG00000058022|ENSMUST00000072012	104	443.561	922.1	980.36	916.99	460.95	1.38066	57.9948	42.0052
Ahcy	Ahcy-201	ENSMUSG00000027597|ENSMUST00000054607	152	440.771	2209.31	743.55	1211.9	685.66	1.55614	60.8784	39.1216
Dad1	Dad1-201	ENSMUSG00000022174|ENSMUST00000022781	33	436.127	2136.02	3057.75	190.59	195.04	13.4683	93.0883	6.91168
Gne	Gne-201	ENSMUSG00000028479|ENSMUST00000030201	359	433.763	1246.14	602.29	48.29	75.08	14.9828	93.7433	6.25672
Rab14	Rab14-202	ENSMUSG00000026878|ENSMUST00000113025	18	432.858	786.57	1509.48	994.83	611.31	1.42955	58.84	41.16
Sult1d1	Sult1d1-201	ENSMUSG00000029273|ENSMUST00000113314	198	432.757	1300.1	705.48	515.7	290.22	2.48856	71.3349	28.6651
Tkt	Tkt-201	ENSMUSG00000021957|ENSMUST00000022529	606	428.862	1437.29	801.66	709.1	73.95	2.85927	74.0884	25.9116
Deptor	Deptor-202	ENSMUSG00000022419|ENSMUST00000096433	232	427.521	1100.81	722.62	666.2	313.37	1.86146	65.0528	34.9472
2010107E04Rik	2010107E04Rik-201	ENSMUSG00000021290|ENSMUST00000021719	23	423.23	510.3	335.81	2013.87	4703.89	0.125951	11.1862	88.8138
Gpi1	Gpi1-201	ENSMUSG00000036427|ENSMUST00000038027	15	414.784	2164.03	914.76	62.43	20.5	37.1252	97.3771	2.62294
Hadha	Hadha-205	ENSMUSG00000025745|ENSMUST00000156859	177	414.001	2859.87	1391.4	731.62	328.6	4.0098	80.0391	19.9609
Aldh8a1	Aldh8a1-201	ENSMUSG00000037542|ENSMUST00000042699	394	401.549	525.18	1173.7	730.31	3496.39	0.40194	28.6703	71.3297
Cyp2c37	Cyp2c37-201	ENSMUSG00000042248|ENSMUST00000049178	417	400.748	1233.55	956.63	34.85	10.27	48.5412	97.9815	2.01852
Sqor	Sqor-201	ENSMUSG00000005803|ENSMUST00000005953	23	398.796	2546.76	292.79	799.15	133.69	3.04398	75.2719	24.7281
Sub1	Sub1-201	ENSMUSG00000022205|ENSMUST00000022816	67	395.46	514.24	924.29	1067.31	1544.09	0.550865	35.5199	64.4801
Gpx4	Gpx4-201	ENSMUSG00000075706|ENSMUST00000097227	227	393.984	195	2107.6	161.39	4368.02	0.508366	33.7031	66.2969
Hsd17b12	Hsd17b12-201	ENSMUSG00000027195|ENSMUST00000028619	159	392.405	1321.54	756.2	3107.68	1401.83	0.460746	31.5418	68.4582
Pklr	Pklr-202	ENSMUSG00000041237|ENSMUST00000107482	355	390.157	743.86	1311.78	1552.84	1801.17	0.61289	37.9995	62.0005
Pah	Pah-201	ENSMUSG00000020051|ENSMUST00000020241	111	386.9	4457.5	2831.49	12923.5	8590.92	0.338795	25.306	74.694
Psmb1	Psmb1-201	ENSMUSG00000014769|ENSMUST00000014913	173	383.98	4058.68	1406.4	633.37	202.48	6.53835	86.7345	13.2655
Gapdh	Gapdh-203	ENSMUSG00000057666|ENSMUST00000118875	63	383.865	5069.06	8580.23	254.38	473.79	18.7446	94.9353	5.06466
Rps4x	Rps4x-201	ENSMUSG00000031320|ENSMUST00000033683	21	376.125	1333.42	1545.61	317.97	735.84	2.73202	73.2049	26.7951
Mup7	Mup7-203	ENSMUSG00000073842|ENSMUST00000166098	54	372.49	27591.7	34713	113166	142701	0.243504	19.5821	80.4179
Cat	Cat-201	ENSMUSG00000027187|ENSMUST00000028610	436	370.208	37214.8	15946.6	11573	1827.84	3.96701	79.8672	20.1328
Ctsd	Ctsd-202	ENSMUSG00000007891|ENSMUST00000151120	50	365.945	571.5	2180.27	1786.9	1473.47	0.844005	45.7702	54.2298
Gpd1	Gpd1-201	ENSMUSG00000023019|ENSMUST00000023760	141	365.812	639.28	5823.5	20.79	176.72	32.7213	97.0345	2.96549
Dynlrb1	Dynlrb1-204	ENSMUSG00000047459|ENSMUST00000150602	101	365.395	82.84	229.88	680.4	1791.01	0.126535	11.2322	88.7678
Blvrb	Blvrb-201	ENSMUSG00000040466|ENSMUST00000037399	192	363.014	3511.25	1020.27	156.76	149.68	14.7876	93.6659	6.33407
Tmem135	Tmem135-201	ENSMUSG00000039428|ENSMUST00000041968	199	361.555	268.7	79.85	859.81	560.27	0.245444	19.7073	80.2927
Atp6v1e1	Atp6v1e1-201	ENSMUSG00000019210|ENSMUST00000019354	98	357.5	94.88	111.19	1853.84	1327.56	0.0647734	6.0833	93.9167
A1cf	A1cf-201	ENSMUSG00000052595|ENSMUST00000075838	443	354.732	1239.07	123.76	38.95	107.48	9.30704	90.2979	9.70211
Fasn	Fasn-201	ENSMUSG00000025153|ENSMUST00000055655	1661	352.546	1218.36	1211.88	440.25	632.29	2.26587	69.3803	30.6197
Ces3a	Ces3a-201	ENSMUSG00000069922|ENSMUST00000093222	74	352.39	12737.9	1229.49	11180.4	1489.42	1.10241	52.4356	47.5644
Cyp3a11	Cyp3a11-201	ENSMUSG00000056035|ENSMUST00000035918	37	351.909	34430	14883.1	7286.46	2850.76	4.86456	82.9484	17.0516
Iqgap2	Iqgap2-201	ENSMUSG00000021676|ENSMUST00000068603	593	351.452	1186.76	333.38	1.12	21.25	67.9544	98.5498	1.45023
Igfbp1	Igfbp1-201	ENSMUSG00000020429|ENSMUST00000020704	83	351.1	258.94	1328.35	45.44	101.27	10.8192	91.5392	8.46078
Etnppl	Etnppl-203	ENSMUSG00000019232|ENSMUST00000166187	46	351.098	773.02	583.91	1310.18	426.22	0.781462	43.8663	56.1337
Hspa9	Hspa9-201	ENSMUSG00000024359|ENSMUST00000025217	446	349.26	1581.31	3886.57	849.29	1050.3	2.87845	74.2165	25.7835
Tufm	Tufm-202	ENSMUSG00000073838|ENSMUST00000106392	131	346.693	441.32	508.96	293.18	731.31	0.927564	48.121	51.879
Glrx	Glrx-201	ENSMUSG00000021591|ENSMUST00000022082	41	345.831	199.46	1406.34	175.21	722.14	1.78949	64.1512	35.8488
Dstn	Dstn-201	ENSMUSG00000015932|ENSMUST00000103172	130	343.096	470.69	1258.12	2402.42	2443.05	0.356789	26.2966	73.7034
Selenop	Selenop-201	ENSMUSG00000064373|ENSMUST00000082424	19	342.667	37994.5	2003.73	34.33	4.03	1042.71	99.9042	0.0958123
Ddb1	Ddb1-201	ENSMUSG00000024740|ENSMUST00000025649	783	340.186	573.33	1075.51	54.64	259.46	5.24941	83.9985	16.0015
Aco2	Aco2-201	ENSMUSG00000022477|ENSMUST00000023116	735	338.131	607.43	454.78	538.4	261.77	1.32748	57.0351	42.9649
H3f3a	H3f3a-205	ENSMUSG00000060743|ENSMUST00000161308	124	336.328	3953	1341.01	5635.23	2024.58	0.691141	40.8683	59.1317
Ndufab1	Ndufab1-203	ENSMUSG00000030869|ENSMUST00000123296	100	334.972	134.19	256.06	1597.49	2467.53	0.096002	8.75929	91.2407
Anp32a	Anp32a-201	ENSMUSG00000032249|ENSMUST00000085519	132	334.569	274.59	1564.04	99.55	363.53	3.97044	79.881	20.119
Bhmt	Bhmt-201	ENSMUSG00000074768|ENSMUST00000099309	186	332.843	3320.35	2095.04	1655.89	1548.79	1.68984	62.823	37.177
Hsd3b5	Hsd3b5-201	ENSMUSG00000038092|ENSMUST00000044094	131	331.085	25.52	277.89	1013.34	1899.3	0.10417	9.43424	90.5658
Ugt3a2	Ugt3a2-201	ENSMUSG00000049152|ENSMUST00000072403	52	330.923	1519.66	2252.69	1222.58	2377.73	1.04778	51.1667	48.8333
Prodh2	Prodh2-201	ENSMUSG00000036892|ENSMUST00000058280	361	330.723	1539.68	274.18	395.16	68.97	3.90809	79.6255	20.3745
Akr1a1	Akr1a1-201	ENSMUSG00000028692|ENSMUST00000030455	20	327.929	945.45	316.68	2849.18	1594.46	0.284031	22.1202	77.8798
Hao1	Hao1-201	ENSMUSG00000027261|ENSMUST00000028704	237	326.449	3075.76	3181.86	925.1	834.9	3.55547	78.0483	21.9517
Tsku	Tsku-201	ENSMUSG00000049580|ENSMUST00000094161	17	323.504	1437.01	454.47	527.65	135.8	2.85098	74.0326	25.9674
Pdcd4	Pdcd4-202	ENSMUSG00000024975|ENSMUST00000074371	376	323.167	506.33	563.12	614.13	823.18	0.744064	42.6626	57.3374
Acot13	Acot13-201	ENSMUSG00000006717|ENSMUST00000006900	87	322.549	510.44	392.06	924.22	726.56	0.546711	35.3467	64.6533
Rpl23a	Rpl23a-201	ENSMUSG00000058546|ENSMUST00000102483	151	321.931	3109.59	1026.85	235.04	156.71	10.5589	91.3486	8.65136
Acat1	Acat1-201	ENSMUSG00000032047|ENSMUST00000034547	226	319.649	323.63	820.5	2450.84	4281.32	0.16995	14.5263	85.4737
Fmo1	Fmo1-201	ENSMUSG00000040181|ENSMUST00000046049	339	317.131	884.62	674.06	861.35	1007.62	0.833978	45.4737	54.5263
Rpl21	Rpl21-202	ENSMUSG00000041453|ENSMUST00000075453	114	316.21	1973.69	406.07	444.97	203.8	3.66811	78.5781	21.4219
Marc2	Marc2-201	ENSMUSG00000073481|ENSMUST00000068725	290	316.004	500.94	2225.71	1362.05	3946.38	0.513645	33.9343	66.0657
Ndufs1	Ndufs1-201	ENSMUSG00000025968|ENSMUST00000027111	454	315.836	632.9	703.86	167.91	38.52	6.47561	86.6232	13.3768
Cyp27a1	Cyp27a1-201	ENSMUSG00000026170|ENSMUST00000027356	15	315.604	5528.17	3762.1	8.71	21.41	308.442	99.6768	0.323162
C1qa	C1qa-201	ENSMUSG00000036887|ENSMUST00000046285	62	315.512	421.32	934.85	153.81	36.81	7.11452	87.6764	12.3236
Acaa2	Acaa2-201	ENSMUSG00000036880|ENSMUST00000041053	293	314.466	10355.3	7467.77	4567.66	3745.21	2.14403	68.1937	31.8063
Acsm1	Acsm1-201	ENSMUSG00000033533|ENSMUST00000047929	395	314.462	1891.13	2715.25	591.93	635.83	3.75186	78.9556	21.0444
Fth1	Fth1-201	ENSMUSG00000024661|ENSMUST00000025563	85	313.983	4669.83	5645.23	1379.33	1270.79	3.8923	79.5597	20.4403
A1cf	A1cf-201	ENSMUSG00000052595|ENSMUST00000075838	276	313.921	796.95	272.38	258.19	157.83	2.57038	71.9918	28.0082
Serpina11	Serpina11-202	ENSMUSG00000063232|ENSMUST00000120251	285	313.402	379.68	883.01	95.46	148.23	5.18154	83.8228	16.1772
Echdc1	Echdc1-201	ENSMUSG00000019883|ENSMUST00000020034	47	306.778	702.25	865.02	138.14	117.94	6.12024	85.9555	14.0445
Etfdh	Etfdh-201	ENSMUSG00000027809|ENSMUST00000029386	349	306.419	939.66	521.17	236.86	285.87	2.79462	73.6469	26.3531
Actb	Actb-201	ENSMUSG00000029580|ENSMUST00000100497	204	306.059	2513.96	22094	401.33	3774.77	5.89257	85.4916	14.5084
Uox	Uox-201	ENSMUSG00000028186|ENSMUST00000029837	286	305.485	35064.2	17391.8	6908.86	3009.61	5.28872	84.0985	15.9015
Dbi	Dbi-201	ENSMUSG00000026385|ENSMUST00000027634	86	304.315	18597.9	8739.17	20578.4	14715.6	0.774553	43.6478	56.3522
Inmt	Inmt-201	ENSMUSG00000003477|ENSMUST00000003569	147	303.625	13092.1	2596.97	3240.8	464.68	4.23402	80.8942	19.1058
Cyp7a1	Cyp7a1-201	ENSMUSG00000028240|ENSMUST00000029905	190	303.063	989.82	922.06	127.25	106.69	8.17252	89.0979	10.9021
Ephx2	Ephx2-202	ENSMUSG00000022040|ENSMUST00000224698	305	301.03	357.66	1002.65	1761.82	10962.1	0.10691	9.65841	90.3416
Cyp2c54	Cyp2c54-201	ENSMUSG00000067225|ENSMUST00000048959	24	299.136	782.23	302.93	418.19	147.72	1.91755	65.7247	34.2753
Cs	Cs-201	ENSMUSG00000005683|ENSMUST00000005826	326	299.13	942.19	265.73	432.69	381.45	1.48368	59.7371	40.2629
Actr2	Actr2-201	ENSMUSG00000020152|ENSMUST00000000137	380	297.625	236.7	771.89	207.95	1320.01	0.660089	39.7623	60.2377
Bhmt	Bhmt-201	ENSMUSG00000074768|ENSMUST00000099309	191	296.419	1757.67	5756.17	150.47	574.81	10.3599	91.1971	8.80288
Anxa7	Anxa7-202	ENSMUSG00000021814|ENSMUST00000100844	394	296.011	1174.04	214.11	69.09	119.45	7.36263	88.042	11.958
Cpb2	Cpb2-201	ENSMUSG00000021999|ENSMUST00000022576	43	295.417	2732.56	1302.43	1134.3	959.4	1.92721	65.8377	34.1623
Ttr	Ttr-201	ENSMUSG00000061808|ENSMUST00000075312	65	295.231	63024.3	154721	39731.7	63864.7	2.10186	67.7613	32.2387
Mat1a	Mat1a-203	ENSMUSG00000037798|ENSMUST00000225720	117	294.869	11217.4	3703.43	774.46	240.03	14.7077	93.6337	6.36629
Hsd3b5	Hsd3b5-201	ENSMUSG00000038092|ENSMUST00000044094	248	293.987	1998.82	401.84	346.82	44.95	6.12773	85.9703	14.0297
Ddc	Ddc-210	ENSMUSG00000020182|ENSMUST00000178704	354	293.555	119.25	1376.32	0	12.97	115.31	99.1402	0.859772
Ganab	Ganab-201	ENSMUSG00000071650|ENSMUST00000096246	133	290.571	514.27	1311.92	223.53	264.97	3.73836	78.8957	21.1043
Cps1	Cps1-201	ENSMUSG00000025991|ENSMUST00000027144	266	290.5	15415.2	5432.29	9801.62	7420.43	1.21051	54.7616	45.2384
Mthfd1	Mthfd1-201	ENSMUSG00000021048|ENSMUST00000021443	480	289.803	1369.04	242.76	371.7	209.33	2.77404	73.5032	26.4968
Cyp2c50	Cyp2c50-202	ENSMUSG00000054827|ENSMUST00000080171	417	288.497	2592.19	1541.21	88.89	53.8	28.9677	96.6631	3.33693
Etfdh	Etfdh-201	ENSMUSG00000027809|ENSMUST00000029386	599	288.485	884.5	392.2	421.01	231.15	1.95765	66.1894	33.8106
Arpc4	Arpc4-201	ENSMUSG00000079426|ENSMUST00000156898	145	285.386	88.66	225.26	637.02	1051.87	0.185874	15.674	84.326
Aldh1a7	Aldh1a7-201	ENSMUSG00000024747|ENSMUST00000025656	400	284.606	159.63	748.32	219.08	1697.48	0.473739	32.1454	67.8546
C8a	C8a-203	ENSMUSG00000035031|ENSMUST00000106808	4	283.075	707.31	2892.23	2093.18	2416.32	0.798213	44.3892	55.6108
Rida	Rida-201	ENSMUSG00000022323|ENSMUST00000022946	93	282.376	12209.7	5294.62	4052.12	1783.11	2.99976	74.9985	25.0015
Uqcrb	Uqcrb-201	ENSMUSG00000021520|ENSMUST00000021993	92	279.556	2342.25	3686.21	146.06	99.64	24.5359	96.0839	3.91606
Pcbp2	Pcbp2-201	ENSMUSG00000056851|ENSMUST00000077037	122	275.815	573.57	162.02	361.99	348.64	1.03512	50.8629	49.1371
Arpc3	Arpc3-202	ENSMUSG00000029465|ENSMUST00000102525	99	275.649	555.11	815.31	483.59	843.76	1.03245	50.7983	49.2017
Acadl	Acadl-201	ENSMUSG00000026003|ENSMUST00000027153	415	274.802	550.37	708.8	784.81	1418.09	0.571597	36.3704	63.6296
Mup3	Mup3-202	ENSMUSG00000066154|ENSMUST00000107472	19	274.64	117022	21423	57621.7	10392.8	2.03552	67.0567	32.9433
Tcp1	Tcp1-209	ENSMUSG00000068039|ENSMUST00000151287	381	274.189	704.76	369.68	93.88	33.8	8.4151	89.3788	10.6212
Hnf4a	Hnf4a-202	ENSMUSG00000017950|ENSMUST00000109411	297	273.477	533.43	2158.61	45.81	308.45	7.59905	88.3708	11.6292
Btf3	Btf3-201	ENSMUSG00000021660|ENSMUST00000022163	81	272.582	1812.49	853.83	40.41	30.63	37.5327	97.4048	2.5952
Ppa1	Ppa1-201	ENSMUSG00000020089|ENSMUST00000020286	171	272.098	2556.32	614.01	13.26	31.79	70.3736	98.5989	1.40108
Hao1	Hao1-201	ENSMUSG00000027261|ENSMUST00000028704	197	271.677	235.76	321.27	3341.08	3408.68	0.0825259	7.62346	92.3765
Cnbp	Cnbp-201	ENSMUSG00000030057|ENSMUST00000032138	118	271.65	1302.64	4415.06	339.17	55.18	14.499	93.548	6.45201
Aldh1a1	Aldh1a1-201	ENSMUSG00000053279|ENSMUST00000087638	400	270.224	1067.15	5750.22	1064.41	6680.96	0.880186	46.8138	53.1862
Me1	Me1-201	ENSMUSG00000032418|ENSMUST00000034989	413	270.149	1130.81	944.53	439.63	293.86	2.8294	73.8863	26.1137
Ebp	Ebp-201	ENSMUSG00000031168|ENSMUST00000033509	88	266.589	4281.27	1312.65	269.48	183.95	12.3369	92.502	7.49799
Plin2	Plin2-201	ENSMUSG00000028494|ENSMUST00000000466	99	265.783	1057.22	5363.83	170.82	574.56	8.61447	89.599	10.401
Msra	Msra-201	ENSMUSG00000054733|ENSMUST00000067927	98	265.255	1748.96	440.82	344.8	159.39	4.34316	81.2845	18.7155
Uqcrc1	Uqcrc1-201	ENSMUSG00000025651|ENSMUST00000026743	264	263.256	2035.24	2209.01	222.66	136.67	11.8116	92.1946	7.80545
Ndufb2	Ndufb2-205	ENSMUSG00000002416|ENSMUST00000135671	98	262.009	187.8	181.14	209.72	253.98	0.795644	44.3097	55.6903
Cps1	Cps1-201	ENSMUSG00000025991|ENSMUST00000027144	888	261.106	3455.93	7090.41	9109.87	12893.5	0.479306	32.4007	67.5993
Cct5	Cct5-201	ENSMUSG00000022234|ENSMUST00000022842	253	259.641	319.77	829.01	263	287.57	2.08653	67.6011	32.3989
Dld	Dld-201	ENSMUSG00000020664|ENSMUST00000110857	36	258.588	190.46	234.83	82.09	1325.99	0.302035	23.1972	76.8028
Aass	Aass-201	ENSMUSG00000029695|ENSMUST00000031707	60	257.262	191.87	170.47	1333.83	935.7	0.159654	13.7674	86.2326
Ecm1	Ecm1-202	ENSMUSG00000028108|ENSMUST00000117507	31	257.23	532.81	985.43	288.96	346.36	2.38972	70.4991	29.5009
Aadat	Aadat-201	ENSMUSG00000057228|ENSMUST00000079472	277	256.21	705.13	682.83	299.13	444.4	1.86672	65.1169	34.8831
Cmbl	Cmbl-201	ENSMUSG00000022235|ENSMUST00000070918	116	256.141	890.8	666.14	286.75	220.36	3.07022	75.4313	24.5687
Cs	Cs-201	ENSMUSG00000005683|ENSMUST00000005826	396	255.923	317.61	436.97	465.58	533.8	0.755048	43.0215	56.9785
Cyp2d10	Cyp2d10-201	ENSMUSG00000094806|ENSMUST00000072776	383	254.57	3183.18	2762.48	50.87	16.7	87.9926	98.8763	1.12369
Csad	Csad-201	ENSMUSG00000023044|ENSMUST00000023805	340	254.112	1057.66	3325.74	325.66	570.48	4.89142	83.0262	16.9738
Rpl18	Rpl18-207	ENSMUSG00000059070|ENSMUST00000210640	17	253.389	1244.01	1986.69	71	156.45	14.204	93.4228	6.57722
Ifitm2	Ifitm2-201	ENSMUSG00000060591|ENSMUST00000081649	19	252.591	2133.07	2525.48	886.88	1033.85	2.42541	70.8064	29.1936
Pdia6	Pdia6-201	ENSMUSG00000020571|ENSMUST00000057288	396	252.361	1611.93	1179.28	1012.88	1049.63	1.35331	57.5066	42.4934
Eif2s2	Eif2s2-201	ENSMUSG00000074656|ENSMUST00000099173	101	251.947	319.74	455.99	402.36	274.04	1.14685	53.4201	46.5799
Eif3c	Eif3c-201	ENSMUSG00000030738|ENSMUST00000032992	633	250.705	458.34	479.24	225.47	245.66	1.99007	66.5559	33.4441
Hadh	Hadh-201	ENSMUSG00000027984|ENSMUST00000029610	215	250.697	1812.81	2294.53	183.58	39.37	18.4227	94.8514	5.14862
Pygl	Pygl-201	ENSMUSG00000021069|ENSMUST00000071250	488	250.185	147.1	288.97	2396.68	3272.5	0.0769194	7.14254	92.8575
Aldh9a1	Aldh9a1-201	ENSMUSG00000026687|ENSMUST00000028004	418	249.571	315.74	905.58	431.87	1692.25	0.574977	36.507	63.493
Ssr2	Ssr2-201	ENSMUSG00000041355|ENSMUST00000035785	17	249.344	730.96	753.28	44.08	97.68	10.4701	91.2817	8.71833
Ndufb11	Ndufb11-201	ENSMUSG00000031059|ENSMUST00000116621	136	249	1077.48	1701.69	723.76	671.72	1.99155	66.5725	33.4275
Hsd3b5	Hsd3b5-201	ENSMUSG00000038092|ENSMUST00000044094	339	248.991	706.23	283.01	990.89	399.97	0.711243	41.563	58.437
Hpgd	Hpgd-201	ENSMUSG00000031613|ENSMUST00000034026	54	248.533	487.56	1091.69	239.54	261.59	3.15138	75.9116	24.0884
Gapdh	Gapdh-203	ENSMUSG00000057666|ENSMUST00000118875	167	247.57	2813.07	761.88	3088.79	2992.5	0.58786	37.0222	62.9778
Arg1	Arg1-201	ENSMUSG00000019987|ENSMUST00000020161	194	247.417	16458.1	1628.08	11635.2	2766.81	1.25581	55.6699	44.3301
Apoa2	Apoa2-204	ENSMUSG00000005681|ENSMUST00000111321	21	243.795	6803.75	2068.11	181429	70422.9	0.0352264	3.40278	96.5972
Crot	Crot-201	ENSMUSG00000003623|ENSMUST00000003720	537	243.437	1335.86	1940.18	3798.49	704.29	0.727559	42.1149	57.8851
Agxt	Agxt-201	ENSMUSG00000026272|ENSMUST00000027491	384	241.522	1019.63	1842.23	449.15	646.19	2.61276	72.3203	27.6797
Ube2b	Ube2b-201	ENSMUSG00000020390|ENSMUST00000020657	42	240.183	640.09	473.56	34.2	5.2	28.2652	96.583	3.41702
Lap3	Lap3-201	ENSMUSG00000039682|ENSMUST00000046122	490	239.566	169.47	3999.07	59.14	368.92	9.73821	90.6875	9.31254
Vcp	Vcp-201	ENSMUSG00000028452|ENSMUST00000030164	318	237.966	527.22	276.02	1586.12	1495.74	0.260635	20.6749	79.3251
Acox1	Acox1-201	ENSMUSG00000020777|ENSMUST00000066587	562	237.198	799.46	1201.27	8214.85	9294.57	0.114266	10.2548	89.7452
Amy1	Amy1-201	ENSMUSG00000074264|ENSMUST00000067980	24	236.82	1675.22	943.25	189.2	28.82	12.0102	92.3137	7.68626
Sdha	Sdha-201	ENSMUSG00000021577|ENSMUST00000022062	398	236.556	2142.45	1793.88	599.54	485.59	3.62752	78.3901	21.6099
Plpp3	Plpp3-201	ENSMUSG00000028517|ENSMUST00000064139	92	236.443	1096.79	586.54	510.24	127.28	2.64043	72.5308	27.4692
Rhoa	Rhoa-201	ENSMUSG00000007815|ENSMUST00000007959	89	236.19	1477.14	487.81	502.62	363.07	2.26981	69.4172	30.5828
Ugt2b36	Ugt2b36-201	ENSMUSG00000070704|ENSMUST00000094649	254	233.301	2703.96	6226.46	465.24	288.71	11.8448	92.2148	7.78523
Fkbp2	Fkbp2-201	ENSMUSG00000056629|ENSMUST00000070878	56	232.811	348.22	1247.72	202.3	488.86	2.30907	69.7801	30.2199
Sub1	Sub1-201	ENSMUSG00000022205|ENSMUST00000022816	84	232.068	387.65	537	452.83	1005.31	0.63413	38.8054	61.1946
Maob	Maob-201	ENSMUSG00000040147|ENSMUST00000040820	114	231.674	49.88	27.34	839.7	788.3	0.0474324	4.52845	95.4716
Napa	Napa-201	ENSMUSG00000006024|ENSMUST00000006181	128	231.277	488.58	784.7	13.25	22.22	35.8974	97.2898	2.71022
Csad	Csad-201	ENSMUSG00000023044|ENSMUST00000023805	357	230.845	3818.29	920.69	5.71	20.01	184.253	99.4602	0.539803
Ppa1	Ppa1-201	ENSMUSG00000020089|ENSMUST00000020286	72	230.689	1340.09	2039.88	100.06	169.78	12.5258	92.6067	7.39326
Eif5a	Eif5a-201	ENSMUSG00000078812|ENSMUST00000043419	93	230.248	4105.78	2039.87	2348.41	1521.27	1.58815	61.3624	38.6376
Rps9	Rps9-201	ENSMUSG00000006333|ENSMUST00000006496	67	229.794	884.07	689.59	723.35	762.05	1.05942	51.4426	48.5574
Atp5b	Atp5b-201	ENSMUSG00000025393|ENSMUST00000026459	307	229.604	2200.35	1831.45	5023.25	4571.05	0.420229	29.5888	70.4112
Slc25a10	Slc25a10-201	ENSMUSG00000025792|ENSMUST00000026899	231	228.81	959.64	478.23	114.88	77.58	7.47101	88.195	11.805
Rpl7	Rpl7-201	ENSMUSG00000043716|ENSMUST00000058437	107	226.043	2205.87	1568.48	151.07	268.83	8.98869	89.9887	10.0113
Pah	Pah-201	ENSMUSG00000020051|ENSMUST00000020241	220	225.652	10582.1	1769.2	905.62	242.99	10.7532	91.4917	8.5083
Eef2	Eef2-201	ENSMUSG00000034994|ENSMUST00000047864	847	224.754	1487.91	759.56	1651.59	1053.4	0.830861	45.3809	54.6191
Cpt1a	Cpt1a-201	ENSMUSG00000024900|ENSMUST00000025835	626	223.903	543.22	1660.33	102.08	88.06	11.5891	92.0566	7.94338
Serpind1	Serpind1-201	ENSMUSG00000022766|ENSMUST00000023450	16	223.834	1485.69	1943.16	1936.06	3343.95	0.649402	39.372	60.628
Caprin1	Caprin1-201	ENSMUSG00000027184|ENSMUST00000028607	155	223.702	510.13	515.88	31.66	117.91	6.85973	87.2769	12.7231
Glul	Glul-201	ENSMUSG00000026473|ENSMUST00000086199	292	223.337	4682.8	2770.75	808.02	456.93	5.89237	85.4912	14.5088
Cdo1	Cdo1-201	ENSMUSG00000033022|ENSMUST00000035804	68	222.735	1699.59	1200.59	4650.83	11342.7	0.181335	15.35	84.65
Iigp1	Iigp1-201	ENSMUSG00000054072|ENSMUST00000032473	218	222.087	570.5	997.19	801.38	1508.77	0.67861	40.4269	59.5731
Iqgap2	Iqgap2-201	ENSMUSG00000021676|ENSMUST00000068603	833	221.635	462.14	194.13	154.85	254.23	1.60426	61.6014	38.3986
Mthfd1	Mthfd1-201	ENSMUSG00000021048|ENSMUST00000021443	385	221.445	567.23	1301.23	85.08	363.11	4.1689	80.6535	19.3465
Upb1	Upb1-201	ENSMUSG00000033427|ENSMUST00000039925	130	220	85.39	404.34	682.19	2012.56	0.181735	15.3786	84.6214
Nit2	Nit2-201	ENSMUSG00000022751|ENSMUST00000023432	127	219.573	103.29	80.67	624.47	803.3	0.128844	11.4138	88.5862
Cd81	Cd81-201	ENSMUSG00000037706|ENSMUST00000037941	61	219.401	1416.86	3485.8	1031.07	2488.99	1.39278	58.2076	41.7924
Ptges3	Ptges3-201	ENSMUSG00000071072|ENSMUST00000052798	52	218.444	1459.55	772.88	1480.51	254.41	1.28676	56.2701	43.7299
Rps3a1	Rps3a1-201	ENSMUSG00000028081|ENSMUST00000029722	45	218.2	2302.78	1309.57	25.41	34.13	60.671	98.3785	1.62151
Eef2	Eef2-201	ENSMUSG00000034994|ENSMUST00000047864	637	217.461	1425.86	2670.94	271.39	247.27	7.89882	88.7626	11.2374
Hmgcs2	Hmgcs2-201	ENSMUSG00000027875|ENSMUST00000090746	488	217.335	3011.53	749.51	18553.9	7644.33	0.143561	12.5538	87.4462
Fasn	Fasn-201	ENSMUSG00000025153|ENSMUST00000055655	831	216.005	1122.47	807.32	39.87	81.44	15.9079	94.0856	5.91439
Urod	Urod-201	ENSMUSG00000028684|ENSMUST00000030446	60	215.626	974.27	196.07	65.91	6.93	16.0673	94.1408	5.85917
Rpl19	Rpl19-201	ENSMUSG00000017404|ENSMUST00000017548	87	215.594	238.41	473.85	899.66	4664.4	0.128011	11.3484	88.6516
Bhmt	Bhmt-201	ENSMUSG00000074768|ENSMUST00000099309	396	214.548	282.32	255.73	3763.92	1706.14	0.0983627	8.9554	91.0446
Ftl1	Ftl1-201	ENSMUSG00000050708|ENSMUST00000094434	159	214.162	88.56	1074.39	16.19	0	71.8314	98.627	1.37303
Eif3c	Eif3c-201	ENSMUSG00000030738|ENSMUST00000032992	726	213.39	261.51	974.27	7.85	2.45	119.979	99.1734	0.826592
Sh3bgrl	Sh3bgrl-201	ENSMUSG00000031246|ENSMUST00000033598	15	212.686	1073.05	196.11	187.49	38	5.62845	84.9135	15.0865
Pgm2	Pgm2-202	ENSMUSG00000025791|ENSMUST00000102783	371	212.354	161.62	202.82	1191.29	346.6	0.236974	19.1576	80.8424
Apof	Apof-201	ENSMUSG00000047631|ENSMUST00000050901	39	211.882	8525.51	3406.8	837.47	680.58	7.86029	88.7137	11.2863
Ldlr	Ldlr-201	ENSMUSG00000032193|ENSMUST00000034713	57	211.703	350.13	162.08	452.36	542.56	0.514825	33.9858	66.0142
Aldh3a2	Aldh3a2-202	ENSMUSG00000010025|ENSMUST00000074127	462	211.315	78.42	712.44	187.33	835.34	0.773329	43.6089	56.3911
Hsd17b4	Hsd17b4-201	ENSMUSG00000024507|ENSMUST00000025385	727	210.777	692.34	853.27	1388.49	1369.45	0.560422	35.9148	64.0852
Tpi1	Tpi1-205	ENSMUSG00000023456|ENSMUST00000172132	224	210.777	3011.21	1035.12	827.25	418.72	3.24753	76.4569	23.5431
Pigr	Pigr-201	ENSMUSG00000026417|ENSMUST00000027675	24	210.702	2479.57	2189.8	3654.65	2631.2	0.742838	42.6223	57.3777
Hacd2	Hacd2-201	ENSMUSG00000035376|ENSMUST00000061156	91	210.68	568.89	439.31	211.81	164.58	2.6786	72.8158	27.1842
Herpud1	Herpud1-205	ENSMUSG00000031770|ENSMUST00000161576	323	210.409	994.85	293.27	1583.92	923.14	0.513797	33.9409	66.0591
Tkt	Tkt-201	ENSMUSG00000021957|ENSMUST00000022529	484	210.317	315.27	1144.51	41.72	163.41	7.11637	87.6792	12.3208
Ogdh	Ogdh-201	ENSMUSG00000020456|ENSMUST00000003461	514	210.275	417.93	129.38	608.88	339.3	0.577222	36.5974	63.4026
Ivd	Ivd-201	ENSMUSG00000027332|ENSMUST00000028807	182	210.049	988.43	318.59	173.94	374.69	2.38233	70.4346	29.5654
Rpl12	Rpl12-203	ENSMUSG00000038900|ENSMUST00000126610	87	208.815	725.53	658.62	91.16	88.1	7.72147	88.534	11.466
Banf1	Banf1-202	ENSMUSG00000024844|ENSMUST00000170010	17	208.725	634.23	235	107.46	43.48	5.75878	85.2044	14.7956
Dnaja2	Dnaja2-201	ENSMUSG00000031701|ENSMUST00000034138	40	208.423	192.21	552.46	116.2	725.6	0.884616	46.9388	53.0612
Slc16a2	Slc16a2-201	ENSMUSG00000033965|ENSMUST00000042664	354	208.403	38.57	50.81	724.85	307.16	0.0866077	7.97047	92.0295
Gstz1	Gstz1-204	ENSMUSG00000021033|ENSMUST00000222222	53	208.048	857.34	4258.01	478.31	2544.09	1.69248	62.8595	37.1405
Snap47	Snap47-201	ENSMUSG00000009894|ENSMUST00000010038	84	207.059	55.01	190.1	141.81	974.98	0.219477	17.9977	82.0023
Atp1a1	Atp1a1-201	ENSMUSG00000033161|ENSMUST00000036493	326	206.142	869.24	389.65	528.48	154.76	1.84253	64.8201	35.1799
Gulo	Gulo-201	ENSMUSG00000034450|ENSMUST00000059970	300	205.635	2801.68	1370.32	485.07	124.27	6.84675	87.2559	12.7441
Arf1	Arf1-202	ENSMUSG00000048076|ENSMUST00000163300	60	205.2	1868.48	1221.74	332.12	817.86	2.68719	72.8791	27.1209
Rps15a	Rps15a-204	ENSMUSG00000008683|ENSMUST00000131374	18	204.948	1273.18	1060.99	15.43	6.14	108.214	99.0844	0.915636
Cyp3a25	Cyp3a25-203	ENSMUSG00000029630|ENSMUST00000145062	16	204.892	188.18	36.78	737.22	870.77	0.139901	12.2731	87.7269
Cisd1	Cisd1-201	ENSMUSG00000037710|ENSMUST00000045887	48	204.613	2118.87	685.75	514.64	1854.48	1.18382	54.2088	45.7912
Suclg2	Suclg2-204	ENSMUSG00000061838|ENSMUST00000204224	362	204.547	267.82	612.55	618.4	1281.42	0.463397	31.6658	68.3342
Oaz1	Oaz1-201	ENSMUSG00000035242|ENSMUST00000060987	21	203.469	443	220.61	169.28	68.37	2.79238	73.6314	26.3686
Capzb	Capzb-204	ENSMUSG00000028745|ENSMUST00000102508	214	203.311	201.2	325.84	681.66	670.41	0.389802	28.0473	71.9527
C6	C6-204	ENSMUSG00000022181|ENSMUST00000162585	17	203.2	2269.79	228.03	1884.36	94.65	1.26216	55.7944	44.2056
Fmo1	Fmo1-201	ENSMUSG00000040181|ENSMUST00000046049	123	202.868	1020.63	558.8	402.48	79.97	3.27377	76.6015	23.3985
Hnrnpk	Hnrnpk-202	ENSMUSG00000021546|ENSMUST00000116403	98	202.822	1879.4	1342.82	19.05	125.61	22.2744	95.7034	4.29656
Ppa1	Ppa1-201	ENSMUSG00000020089|ENSMUST00000020286	142	202.291	363.11	2851.76	16.49	244.91	12.2987	92.4804	7.51955
Gstm7	Gstm7-201	ENSMUSG00000004035|ENSMUST00000004137	39	202.146	56.01	93.49	360.09	639.1	0.149621	13.0148	86.9852
Ly6e	Ly6e-210	ENSMUSG00000022587|ENSMUST00000188866	35	201.987	4723.69	4631.86	491.4	294.12	11.91	92.2541	7.74593
Ndufa10	Ndufa10-201	ENSMUSG00000026260|ENSMUST00000027478	300	201.825	642.13	1300.08	51.84	27.04	24.6223	96.0972	3.90284
Hnrnpc	Hnrnpc-201	ENSMUSG00000060373|ENSMUST00000111610	81	200.998	27.22	21.47	772.42	234.6	0.0483506	4.61206	95.3879
Selenbp2	Selenbp2-201	ENSMUSG00000068877|ENSMUST00000090848	469	200.942	1501.32	3152.69	612.49	1178.26	2.59892	72.2139	27.7861
Akr1c6	Akr1c6-201	ENSMUSG00000021210|ENSMUST00000021630	302	200.898	6117.6	5117.47	7600.81	3863.39	0.980013	49.4953	50.5047
Thrsp	Thrsp-201	ENSMUSG00000035686|ENSMUST00000043077	18	200.873	798.86	1928.67	2774.14	4867.09	0.356949	26.3053	73.6947
Trap1	Trap1-201	ENSMUSG00000005981|ENSMUST00000006137	564	200.462	1347.83	387.16	78.24	16.44	18.3248	94.8253	5.1747
Glud1	Glud1-201	ENSMUSG00000021794|ENSMUST00000022322	229	200.449	3115.84	1126.16	4001.11	882.08	0.868694	46.4867	53.5133
Acox1	Acox1-201	ENSMUSG00000020777|ENSMUST00000066587	566	199.589	9354.66	2720.93	1513.58	384.7	6.36133	86.4155	13.5845
Hsp90ab1	Hsp90ab1-201	ENSMUSG00000023944|ENSMUST00000024739	440	199.268	1102.87	887.46	2164.84	2002.54	0.477597	32.3226	67.6774
Acsl5	Acsl5-201	ENSMUSG00000024981|ENSMUST00000043150	213	198.155	2108.82	665.01	715.56	237.53	2.91035	74.4269	25.5731
Ywhab	Ywhab-201	ENSMUSG00000018326|ENSMUST00000018470	137	198.101	735.07	332.31	534.29	195.83	1.46192	59.3814	40.6186
Sephs2	Sephs2-201	ENSMUSG00000049091|ENSMUST00000082428	62	197.829	797.47	1058.11	487.36	347.1	2.22369	68.9796	31.0204
Cyp2a5	Cyp2a5-201	ENSMUSG00000005547|ENSMUST00000005685	74	197.706	3702.26	2710.01	940.01	730.86	3.83768	79.3289	20.6711
Cyp2c50	Cyp2c50-202	ENSMUSG00000054827|ENSMUST00000080171	203	196.889	1261.63	927.66	308.09	58.66	5.96943	85.6516	14.3484
Slc25a5	Slc25a5-201	ENSMUSG00000016319|ENSMUST00000016463	15	196.878	4560.42	2170.66	403.75	291.6	9.68013	90.6368	9.36318
Rpl35a	Rpl35a-201	ENSMUSG00000060636|ENSMUST00000078804	98	196.447	640.63	2656.08	441.21	2715.62	1.04431	51.0837	48.9163
Gdi2	Gdi2-209	ENSMUSG00000021218|ENSMUST00000223396	419	196.436	420.91	521.79	833.58	1179.48	0.468292	31.8937	68.1063
Crot	Crot-201	ENSMUSG00000003623|ENSMUST00000003720	170	195.799	3465.27	1322.45	224.21	418.48	7.4495	88.165	11.835
Fdft1	Fdft1-204	ENSMUSG00000021273|ENSMUST00000224625	155	195.464	312.15	722.45	62.93	228.6	3.54886	78.0165	21.9835
Hmgcl	Hmgcl-201	ENSMUSG00000028672|ENSMUST00000030432	212	195.365	267.03	1680.23	57.55	246.67	6.40083	86.488	13.512
Cyp7a1	Cyp7a1-201	ENSMUSG00000028240|ENSMUST00000029905	191	194.977	136.3	90.09	875.48	306.53	0.19153	16.0743	83.9257
F5	F5-201	ENSMUSG00000026579|ENSMUST00000086040	1528	194.496	994.09	1002.75	26.51	40.24	29.9152	96.7653	3.23465
Ahcy	Ahcy-201	ENSMUSG00000027597|ENSMUST00000054607	171	194.341	939.98	805.44	150.65	98.74	6.99876	87.4981	12.5019
Ttr	Ttr-201	ENSMUSG00000061808|ENSMUST00000075312	70	193.791	4064.51	23344.2	22236.1	169938	0.142625	12.4822	87.5178
Ahcy	Ahcy-201	ENSMUSG00000027597|ENSMUST00000054607	352	193.383	88.41	1676.73	19.99	372.85	4.49328	81.7959	18.2041
Echdc1	Echdc1-201	ENSMUSG00000019883|ENSMUST00000020034	296	193.176	109.98	116.51	548.28	381.1	0.2437	19.5948	80.4052
Ugdh	Ugdh-201	ENSMUSG00000029201|ENSMUST00000031103	485	192.78	821.79	1088.16	324.3	172.52	3.84435	79.3574	20.6426
Cyp2c54	Cyp2c54-201	ENSMUSG00000067225|ENSMUST00000048959	417	192.204	648.83	383.61	6.55	2.44	114.843	99.1368	0.863236
Gsta3	Gsta3-201	ENSMUSG00000025934|ENSMUST00000027067	84	192.072	2068.45	1619.78	15584.3	10407.8	0.141898	12.4265	87.5735
Cmbl	Cmbl-201	ENSMUSG00000022235|ENSMUST00000070918	173	191.766	121.99	119.17	770.86	571.31	0.179679	15.2312	84.7688
Ndufb3	Ndufb3-201	ENSMUSG00000026032|ENSMUST00000027193	23	191.265	983.65	803.4	662.07	933.93	1.11971	52.8236	47.1764
Fah	Fah-201	ENSMUSG00000030630|ENSMUST00000032865	178	190.697	3508.75	4233.34	392.87	506.46	8.60873	89.5928	10.4072
Serpina1a	Serpina1a-201	ENSMUSG00000066366|ENSMUST00000072876	333	190.567	4637.89	548.24	778.51	72.31	6.09545	85.9065	14.0935
Csad	Csad-201	ENSMUSG00000023044|ENSMUST00000023805	296	190.333	2372.01	432.53	957	228.2	2.3663	70.2938	29.7062
Akr1c14	Akr1c14-202	ENSMUSG00000033715|ENSMUST00000118717	223	190.326	1008.59	4829.56	148.06	1561.3	3.4154	77.352	22.648
Ube2v1	Ube2v1-202	ENSMUSG00000078923|ENSMUST00000109207	60	189.764	394.9	396.51	127.24	121.92	3.17631	76.0554	23.9446
Anxa6	Anxa6-202	ENSMUSG00000018340|ENSMUST00000108883	166	189.546	284	417.86	266.45	514.13	0.899152	47.3449	52.6551
Psmb2	Psmb2-201	ENSMUSG00000028837|ENSMUST00000030642	153	189.2	484.31	695.31	504.24	635.93	1.0346	50.8503	49.1497
Cct4	Cct4-204	ENSMUSG00000007739|ENSMUST00000173867	472	188.279	442.69	391.19	24.31	101.26	6.64076	86.9123	13.0877
Uox	Uox-201	ENSMUSG00000028186|ENSMUST00000029837	123	187.875	13744.5	9340.47	8455.22	2896.12	2.03368	67.0367	32.9633
Snap47	Snap47-201	ENSMUSG00000009894|ENSMUST00000010038	319	187.447	509.7	123.52	447.55	49.06	1.27509	56.0456	43.9544
Maob	Maob-201	ENSMUSG00000040147|ENSMUST00000040820	303	186.636	174.17	158.53	685.47	301.24	0.337181	25.2158	74.7842
Ass1	Ass1-201	ENSMUSG00000076441|ENSMUST00000102840	264	186.458	9497.69	24474.7	1066.02	4763.9	5.82724	85.3528	14.6472
Deptor	Deptor-202	ENSMUSG00000022419|ENSMUST00000096433	233	185.934	321.04	333.2	297.31	287.5	1.11872	52.8017	47.1983
Eef1a1	Eef1a1-201	ENSMUSG00000037742|ENSMUST00000042235	70	185.027	9256.34	1708.82	10702.5	2791.86	0.812572	44.8298	55.1702
Hadha	Hadha-205	ENSMUSG00000025745|ENSMUST00000156859	184	184.824	453.2	341.76	824.19	790.75	0.492254	32.9873	67.0127
C130074G19Rik	C130074G19Rik-201	ENSMUSG00000039349|ENSMUST00000048308	46	184.747	562.34	268.2	30.05	18.81	16.9984	94.4439	5.55606
Taldo1	Taldo1-204	ENSMUSG00000025503|ENSMUST00000211654	381	182.935	395.99	621.31	167.32	481.73	1.56737	61.0496	38.9504
Id3	Id3-201	ENSMUSG00000007872|ENSMUST00000008016	20	182.2	679.84	1735.38	64.58	236.25	8.02852	88.924	11.076
Cyp4a12a	Cyp4a12a-201	ENSMUSG00000066071|ENSMUST00000084343	399	182.041	831.58	317.55	35.05	55.16	12.7384	92.7211	7.27887
Acot13	Acot13-201	ENSMUSG00000006717|ENSMUST00000006900	81	181.599	71.35	698.97	70.34	587.85	1.17036	53.9247	46.0753
Aldh1a1	Aldh1a1-201	ENSMUSG00000053279|ENSMUST00000087638	157	181.566	2761.77	3211.84	520.26	2032.88	2.33971	70.0573	29.9427
Ftl1	Ftl1-201	ENSMUSG00000050708|ENSMUST00000094434	168	181.386	374.7	310.11	278.78	63.77	1.99915	66.6573	33.3427
Saa1	Saa1-201	ENSMUSG00000074115|ENSMUST00000128088	55	180.682	23.1	45.03	504.31	645.01	0.0592785	5.59612	94.4039
Baat	Baat-201	ENSMUSG00000039653|ENSMUST00000043056	89	180.048	630.51	213.17	1605.16	732.24	0.360948	26.5218	73.4782
Suclg2	Suclg2-204	ENSMUSG00000061838|ENSMUST00000204224	283	179.686	637.51	964.82	368.68	391.25	2.10852	67.8304	32.1696
Por	Por-201	ENSMUSG00000005514|ENSMUST00000005651	597	179.384	468.65	1307.9	78.97	190.17	6.60084	86.8436	13.1564
Ndufc2	Ndufc2-201	ENSMUSG00000030647|ENSMUST00000032882	110	179.119	145.69	124.01	1043.37	339.27	0.195062	16.3223	83.6777
Tgoln1	Tgoln1-201	ENSMUSG00000056429|ENSMUST00000070524	82	178.749	420.83	650.23	160.37	496.76	1.62991	61.9758	38.0242
Copa	Copa-206	ENSMUSG00000026553|ENSMUST00000135192	37	178.683	308.19	261.69	215.03	114.41	1.72984	63.3679	36.6321
Acsl1	Acsl1-203	ENSMUSG00000018796|ENSMUST00000110372	347	178.51	2464.24	1082.51	1219.28	1808.13	1.17155	53.9499	46.0501
Etnppl	Etnppl-203	ENSMUSG00000019232|ENSMUST00000166187	422	178.326	534.73	140.73	962.66	284.16	0.541746	35.1385	64.8615
Calm1	Calm1-202	ENSMUSG00000001175|ENSMUST00000110082	104	178.293	185.13	3290.13	127.79	26.4	22.5388	95.7517	4.2483
Ttr	Ttr-201	ENSMUSG00000061808|ENSMUST00000075312	26	177.615	113557	17779.3	36597.4	3691.9	3.25983	76.5249	23.4751
Coq8a	Coq8a-217	ENSMUSG00000026489|ENSMUST00000170472	197	177.174	60.24	72.27	581.52	1509.93	0.063358	5.95829	94.0417
Cfhr2	Cfhr2-201	ENSMUSG00000033898|ENSMUST00000094489	23	177.03	4277.44	1712.01	218.97	110.1	18.2011	94.792	5.20802
Sqor	Sqor-201	ENSMUSG00000005803|ENSMUST00000005953	289	176.668	539.14	760.73	163.88	193.7	3.63519	78.4259	21.5741
Aco1	Aco1-201	ENSMUSG00000028405|ENSMUST00000102973	524	176.616	636.1	513.66	263.02	272.47	2.14712	68.2249	31.7751
Eif5	Eif5-202	ENSMUSG00000021282|ENSMUST00000166123	31	176.426	697.06	251.31	71.5	25.69	9.7579	90.7045	9.2955
A1cf	A1cf-201	ENSMUSG00000052595|ENSMUST00000075838	46	175.99	125.8	28.11	540.4	173.58	0.215566	17.7338	82.2662
Iqgap2	Iqgap2-201	ENSMUSG00000021676|ENSMUST00000068603	1321	175.637	268.07	76.63	393.38	103.21	0.694134	40.9728	59.0272
Cmbl	Cmbl-201	ENSMUSG00000022235|ENSMUST00000070918	50	175.528	16.51	42.13	815.74	589.01	0.0417441	4.00713	95.9929
Banf1	Banf1-202	ENSMUSG00000024844|ENSMUST00000170010	16	175.298	195.56	285.4	105.96	194.89	1.59867	61.5188	38.4812
Prdx2	Prdx2-203	ENSMUSG00000005161|ENSMUST00000109734	149	173.871	1244.9	1245.06	81.06	63.58	17.2149	94.51	5.49002
Psmd11	Psmd11-214	ENSMUSG00000017428|ENSMUST00000173938	94	173.462	352.73	466.54	46.43	206.2	3.24296	76.4316	23.5684
Ephx1	Ephx1-201	ENSMUSG00000038776|ENSMUST00000036928	21	173.447	1197.45	1029.66	1573.27	1507	0.723024	41.9625	58.0375
Cyp2c37	Cyp2c37-201	ENSMUSG00000042248|ENSMUST00000049178	285	173.323	26.02	18.8	694	300.73	0.0450575	4.31148	95.6885
Ddt	Ddt-202	ENSMUSG00000001666|ENSMUST00000172820	56	172.566	1484.78	203.59	2734.87	997.66	0.452339	31.1456	68.8544
Ugt1a1	Ugt1a1-201	ENSMUSG00000089960|ENSMUST00000073049	23	172.537	265.06	418.95	816.9	2122.1	0.232736	18.8796	81.1204
Baat	Baat-201	ENSMUSG00000039653|ENSMUST00000043056	414	172.214	590.63	565.18	874.88	924.01	0.642513	39.1177	60.8823
Rad23b	Rad23b-201	ENSMUSG00000028426|ENSMUST00000030134	230	172.049	317.49	505.45	150.23	208.14	2.29634	69.6633	30.3367
Srsf5	Srsf5-201	ENSMUSG00000021134|ENSMUST00000094693	227	171.927	51.41	219.9	123.16	1145.27	0.213894	17.6205	82.3795
Abcd3	Abcd3-201	ENSMUSG00000028127|ENSMUST00000029770	640	171.623	1884.67	1231.85	281.72	246.97	5.8948	85.4963	14.5037
Ndufs2	Ndufs2-201	ENSMUSG00000013593|ENSMUST00000013737	70	171.289	232.61	91.25	1109.83	209.91	0.245397	19.7043	80.2957
Apob	Apob-202	ENSMUSG00000020609|ENSMUST00000037811	1974	170.719	1083.96	1085.58	3991.28	5456.78	0.229628	18.6746	81.3254
Eef2	Eef2-201	ENSMUSG00000034994|ENSMUST00000047864	240	170.706	2186.69	753.46	293.88	191.88	6.05268	85.821	14.179
Glud1	Glud1-201	ENSMUSG00000021794|ENSMUST00000022322	186	170.68	793.16	3164.42	605.37	3498.43	0.96437	49.0931	50.9069
Mug1	Mug1-201	ENSMUSG00000059908|ENSMUST00000032228	1163	169.454	10327.2	4608.96	3342.62	1280.19	3.23096	76.3647	23.6353
Hibch	Hibch-201	ENSMUSG00000041426|ENSMUST00000044478	329	168.523	9.92	28.45	231.74	632.42	0.0444015	4.25138	95.7486
Tmem50a	Tmem50a-201	ENSMUSG00000028822|ENSMUST00000030626	80	168.195	52.16	67.62	868.48	417.83	0.0931191	8.51866	91.4813
Glud1	Glud1-201	ENSMUSG00000021794|ENSMUST00000022322	528	168.192	936.69	5211.29	326.89	1467.62	3.42599	77.4062	22.5938
Cmbl	Cmbl-201	ENSMUSG00000022235|ENSMUST00000070918	169	167.903	394.01	724.98	38.37	96.46	8.29927	89.2465	10.7535
Ddb1	Ddb1-201	ENSMUSG00000024740|ENSMUST00000025649	495	167.754	366.54	633.44	11.26	71.27	12.1166	92.3761	7.62395
Capzb	Capzb-204	ENSMUSG00000028745|ENSMUST00000102508	238	167.625	424.06	527.24	315.32	265.33	1.63834	62.0973	37.9027
Rpl4	Rpl4-201	ENSMUSG00000032399|ENSMUST00000034966	372	167.347	110.11	206.46	748.99	1050.18	0.175953	14.9626	85.0374
Abcd3	Abcd3-201	ENSMUSG00000028127|ENSMUST00000029770	643	167.111	118.39	78.63	2268.55	1318.11	0.0549313	5.2071	94.7929
Calm2	Calm2-201	ENSMUSG00000036438|ENSMUST00000040440	104	166.861	359.19	1161.99	194.39	169.36	4.18194	80.7022	19.2978
Sbds	Sbds-201	ENSMUSG00000025337|ENSMUST00000026387	222	166.569	468.18	424.28	27.13	33.51	14.7173	93.6376	6.3624
Ndufab1	Ndufab1-203	ENSMUSG00000030869|ENSMUST00000123296	101	166.43	494.52	573.94	479.5	539.06	1.04899	51.1955	48.8045
Atp5g1	Atp5g1-201	ENSMUSG00000006057|ENSMUST00000090541	39	166.248	1069.31	2880.59	616.62	224.05	4.69851	82.4516	17.5484
Gm4788	Gm4788-203	ENSMUSG00000070594|ENSMUST00000111989	54	166.226	129.15	830.11	501.18	283.66	1.22224	55.0003	44.9997
Dbt	Dbt-201	ENSMUSG00000000340|ENSMUST00000000349	19	165.732	177.73	184.88	224.84	257.75	0.751383	42.9023	57.0977
Oat	Oat-201	ENSMUSG00000030934|ENSMUST00000084500	146	165.243	1145.91	1770.24	1439.41	1936.46	0.863822	46.3468	53.6532
Hal	Hal-202	ENSMUSG00000020017|ENSMUST00000129421	436	165.187	1804.58	549.05	57.92	88.26	16.1009	94.1524	5.84764
Rps4x	Rps4x-201	ENSMUSG00000031320|ENSMUST00000033683	198	165.039	849.66	214.56	436.21	85.26	2.04081	67.114	32.886
Gjb2	Gjb2-201	ENSMUSG00000046352|ENSMUST00000055698	206	164.695	2170.62	815.41	631.31	269.36	3.31534	76.8269	23.1731
Ddb1	Ddb1-201	ENSMUSG00000024740|ENSMUST00000025649	950	164.446	109.33	231.21	315.22	476.54	0.430105	30.0751	69.9249
Aldob	Aldob-201	ENSMUSG00000028307|ENSMUST00000029987	184	163.033	10079.4	15722.1	12130.3	4087.84	1.5909	61.4034	38.5966
Ddc	Ddc-210	ENSMUSG00000020182|ENSMUST00000178704	123	162.62	239.28	476.79	83.73	80.05	4.37215	81.3855	18.6145
Acly	Acly-203	ENSMUSG00000020917|ENSMUST00000107389	116	162.565	98.74	862.49	60.94	592.32	1.47144	59.5377	40.4623
Slco1b2	Slco1b2-201	ENSMUSG00000030236|ENSMUST00000042812	60	162.221	3467.84	3164.55	569.08	256.03	8.03819	88.9358	11.0642
Idh1	Idh1-201	ENSMUSG00000025950|ENSMUST00000097709	186	161.755	2472.55	1039.89	1736.76	1358.9	1.13463	53.1536	46.8464
Ndufs5	Ndufs5-203	ENSMUSG00000028648|ENSMUST00000106207	78	160.967	89.85	489.48	192.56	1679.88	0.309398	23.6291	76.3709
Mtch2	Mtch2-205	ENSMUSG00000027282|ENSMUST00000136872	40	160.927	467.84	548.03	589.97	523.78	0.912117	47.7019	52.2981
Hebp1	Hebp1-201	ENSMUSG00000042770|ENSMUST00000045855	127	160.79	204.12	553.48	858.9	1968.79	0.267922	21.1308	78.8692
Gnmt	Gnmt-201	ENSMUSG00000002769|ENSMUST00000002846	25	160.593	5889.58	12037.8	2004.89	4816.09	2.62827	72.4386	27.5614
Mat1a	Mat1a-203	ENSMUSG00000037798|ENSMUST00000225720	344	160.555	1499.4	9595.5	373.12	754.69	9.83756	90.7728	9.22717
Ldha	Ldha-210	ENSMUSG00000063229|ENSMUST00000209984	170	160.377	654.49	3696.46	764.29	4011.04	0.911131	47.675	52.325
Selenbp2	Selenbp2-201	ENSMUSG00000068877|ENSMUST00000090848	293	160.344	607.19	2974.66	366.25	1138.56	2.38027	70.4165	29.5835
Dnaja2	Dnaja2-201	ENSMUSG00000031701|ENSMUST00000034138	366	160.256	34.29	157.67	144.85	880.09	0.187289	15.7745	84.2255
Acadvl	Acadvl-202	ENSMUSG00000018574|ENSMUST00000102574	219	160.222	1455.62	645.84	24.55	40.95	32.0834	96.9773	3.02267
Pccb	Pccb-201	ENSMUSG00000032527|ENSMUST00000035116	106	159.532	212.37	37.22	563.96	182.98	0.33415	25.0459	74.9541
Grhpr	Grhpr-201	ENSMUSG00000035637|ENSMUST00000045078	246	159.458	804.62	669.9	205.61	296.68	2.93559	74.5909	25.4091
Eef2	Eef2-201	ENSMUSG00000034994|ENSMUST00000047864	664	159.195	822.46	1683.41	341.72	482.98	3.03852	75.2385	24.7615
Sod2	Sod2-201	ENSMUSG00000006818|ENSMUST00000007012	181	158.634	413.89	279.54	892.46	1553.11	0.283545	22.0908	77.9092
Hamp	Hamp-201	ENSMUSG00000050440|ENSMUST00000062620	46	158.514	13620.8	9105.29	9430.29	9075.51	1.22805	55.1177	44.8823
Cnih1	Cnih1-201	ENSMUSG00000015759|ENSMUST00000015903	40	158.289	160.37	424.77	160.57	244.57	1.44429	59.0883	40.9117
Sqor	Sqor-201	ENSMUSG00000005803|ENSMUST00000005953	279	158.279	171.97	133.66	716.06	586.41	0.234654	19.0057	80.9943
A1cf	A1cf-201	ENSMUSG00000052595|ENSMUST00000075838	432	157.986	87.7	103.98	337.67	265.61	0.31773	24.1119	75.8881
Thrsp	Thrsp-201	ENSMUSG00000035686|ENSMUST00000043077	15	157.73	4371.36	2297.8	1038.69	456.08	4.46166	81.6906	18.3094
Cltc	Cltc-202	ENSMUSG00000047126|ENSMUST00000103186	1032	157.064	400.94	171.88	215.77	88.96	1.87976	65.2749	34.7251
Hsd3b5	Hsd3b5-201	ENSMUSG00000038092|ENSMUST00000044094	170	157.02	746.35	297.7	182.62	185.54	2.83586	73.9302	26.0698
Gcdh	Gcdh-201	ENSMUSG00000003809|ENSMUST00000003907	91	157.01	2167.19	574.16	145.65	134.53	9.78425	90.7272	9.27279
Tkfc	Tkfc-201	ENSMUSG00000034371|ENSMUST00000037678	490	156.873	150.15	108.17	1557.84	1649.23	0.080547	7.45428	92.5457
Dnaja1	Dnaja1-201	ENSMUSG00000028410|ENSMUST00000030118	184	156.381	1175.38	512.37	756.05	565.32	1.27727	56.0878	43.9122
Uba1	Uba1-201	ENSMUSG00000001924|ENSMUST00000001989	271	155.798	145.52	133.3	112.14	511.84	0.446841	30.8839	69.1161
Mpst	Mpst-201	ENSMUSG00000071711|ENSMUST00000043865	294	155.752	363.2	376.81	111.25	216.41	2.25847	69.3107	30.6893
Saa1	Saa1-201	ENSMUSG00000074115|ENSMUST00000128088	109	155.659	193.23	380.09	151.39	308.48	1.2467	55.4903	44.5097
Dbt	Dbt-201	ENSMUSG00000000340|ENSMUST00000000349	137	155.273	340.68	369.41	47.32	5.74	13.3828	93.0472	6.95276
Gclc	Gclc-201	ENSMUSG00000032350|ENSMUST00000034905	351	155.224	145.28	235.83	361.53	708.11	0.356297	26.2699	73.7301
Ugt2a3	Ugt2a3-201	ENSMUSG00000035780|ENSMUST00000031195	29	155.202	1130.49	692.06	556.71	454.9	1.80163	64.3065	35.6935
Mup7	Mup7-203	ENSMUSG00000073842|ENSMUST00000166098	15	155.077	65609.5	18289.3	35289.6	7168.72	1.97603	66.3982	33.6018
Ran	Ran-202	ENSMUSG00000029430|ENSMUST00000111343	114	155.074	131.55	332.52	398.1	766.69	0.398415	28.4905	71.5095
Fam162a	Fam162a-201	ENSMUSG00000003955|ENSMUST00000004057	123	155.009	239.53	68.61	270.6	180.94	0.68242	40.5618	59.4382
Hsp90ab1	Hsp90ab1-201	ENSMUSG00000023944|ENSMUST00000024739	366	154.66	314.61	263.43	1936.15	2427.08	0.13248	11.6982	88.3018
Ugp2	Ugp2-202	ENSMUSG00000001891|ENSMUST00000102875	384	154.424	426.54	1312.32	727.21	1441.36	0.801846	44.5014	55.4986
Ugt1a1	Ugt1a1-201	ENSMUSG00000089960|ENSMUST00000073049	98	154.374	520.12	1278.09	313.71	1159.39	1.2207	54.9691	45.0309
Rab18	Rab18-201	ENSMUSG00000073639|ENSMUST00000097680	15	154.07	689.21	260.54	82.02	20.14	9.29669	90.2881	9.71186
Cstb	Cstb-201	ENSMUSG00000005054|ENSMUST00000005185	61	153.436	685.58	103.31	165.94	30.89	4.00798	80.0319	19.9681
Adh5	Adh5-201	ENSMUSG00000028138|ENSMUST00000005964	320	152.798	1562.46	1754.81	486.71	711.5	2.76852	73.4644	26.5356
Gpt	Gpt-201	ENSMUSG00000022546|ENSMUST00000023203	445	152.355	1102.2	573.71	143.7	136.26	5.98625	85.6862	14.3138
Fmo1	Fmo1-201	ENSMUSG00000040181|ENSMUST00000046049	168	152.177	524.07	594.21	138.1	323.57	2.42225	70.7795	29.2205
Clec2d	Clec2d-201	ENSMUSG00000030157|ENSMUST00000032260	149	152.16	521.27	717.09	406.91	71.91	2.58627	72.1159	27.8841
Mrps28	Mrps28-201	ENSMUSG00000040269|ENSMUST00000042148	80	151.913	47.48	51.22	530.37	213.71	0.132647	11.7112	88.2888
Anxa6	Anxa6-202	ENSMUSG00000018340|ENSMUST00000108883	279	151.695	202.18	199.51	359.26	477.31	0.480163	32.4399	67.5601
4931406C07Rik	4931406C07Rik-203	ENSMUSG00000031938|ENSMUST00000180339	198	151.558	148.54	960.64	92.54	885.95	1.13356	53.13	46.87
Sdhc	Sdhc-202	ENSMUSG00000058076|ENSMUST00000111336	140	151.306	482.38	137	2384.28	1063.6	0.179641	15.2284	84.7716
Psmb4	Psmb4-201	ENSMUSG00000005779|ENSMUST00000005923	106	151.18	109.69	189.4	582.21	999.31	0.189116	15.9039	84.0961
Por	Por-201	ENSMUSG00000005514|ENSMUST00000005651	480	151.128	247.24	1279.96	99.04	163.48	5.81746	85.3318	14.6682
Hsd17b11	Hsd17b11-201	ENSMUSG00000029311|ENSMUST00000031251	67	150.63	239.43	190.28	786.14	629.29	0.30359	23.2887	76.7113
Actb	Actb-201	ENSMUSG00000029580|ENSMUST00000100497	146	150.527	4872.95	7779.94	396.95	579.17	12.9624	92.8379	7.16208
Acss2	Acss2-201	ENSMUSG00000027605|ENSMUST00000029135	534	150.394	417.02	209.92	403.96	321.36	0.864363	46.3624	53.6376
Hnrnpk	Hnrnpk-202	ENSMUSG00000021546|ENSMUST00000116403	17	150.359	229.5	907.98	635	941.34	0.721596	41.9143	58.0857
Vdac1	Vdac1-202	ENSMUSG00000020402|ENSMUST00000102758	254	150.342	1433.5	684.31	712.57	195.94	2.33108	69.9797	30.0203
Adk	Adk-201	ENSMUSG00000039197|ENSMUST00000045376	256	149.997	3251.03	1115.22	2666.6	882.63	1.2302	55.1609	44.8391
Pebp1	Pebp1-201	ENSMUSG00000032959|ENSMUST00000036951	42	149.858	232.39	183.29	1195.89	396.42	0.261055	20.7013	79.2987
Adh1	Adh1-201	ENSMUSG00000074207|ENSMUST00000004232	253	149.769	3999.2	19427.8	49.35	167.44	108.063	99.0831	0.916899
Ugt3a2	Ugt3a2-201	ENSMUSG00000049152|ENSMUST00000072403	61	149.624	1301.05	657.71	517.95	389.07	2.15956	68.35	31.65
Gstt2	Gstt2-208	ENSMUSG00000033318|ENSMUST00000220440	25	149.321	135.93	534.87	24.83	59.8	7.92627	88.7971	11.2029
Apoa2	Apoa2-204	ENSMUSG00000005681|ENSMUST00000111321	56	148.928	22776.2	38679.4	25073.4	67898.9	0.661009	39.7956	60.2044
Ogdh	Ogdh-201	ENSMUSG00000020456|ENSMUST00000003461	418	148.782	352.23	471.53	133.48	149.22	2.9139	74.45	25.55
Tkt	Tkt-201	ENSMUSG00000021957|ENSMUST00000022529	253	148.656	782.52	154.42	223.92	61.09	3.28739	76.6758	23.3242
Hsp90ab1	Hsp90ab1-201	ENSMUSG00000023944|ENSMUST00000024739	582	148.623	1206.52	217.59	2573.67	790.85	0.423273	29.7394	70.2606
Cyp1a2	Cyp1a2-201	ENSMUSG00000032310|ENSMUST00000034860	494	148.194	2104.56	1911.92	1371.98	1773.25	1.27701	56.0827	43.9173
Eef2	Eef2-201	ENSMUSG00000034994|ENSMUST00000047864	674	148.011	602.63	1819.25	288.03	616.02	2.67892	72.8181	27.1819
Fah	Fah-201	ENSMUSG00000030630|ENSMUST00000032865	360	147.751	1079.35	4939.61	234.13	508.22	8.10798	89.0206	10.9794
Sord	Sord-201	ENSMUSG00000027227|ENSMUST00000110551	312	147.642	5163.78	4553.14	1299.26	1271.37	3.77998	79.0794	20.9206
Tgoln1	Tgoln1-201	ENSMUSG00000056429|ENSMUST00000070524	29	147.558	261.71	212.84	535.21	421.13	0.496215	33.1647	66.8353
Hnrnpc	Hnrnpc-201	ENSMUSG00000060373|ENSMUST00000111610	191	147.548	45.19	198.95	64.71	466.57	0.459532	31.4849	68.5151
Csnk1a1	Csnk1a1-204	ENSMUSG00000024576|ENSMUST00000165123	94	147.429	20.3	32.94	389.16	330.67	0.0739619	6.88683	93.1132
Aadat	Aadat-201	ENSMUSG00000057228|ENSMUST00000079472	276	146.769	335.38	804.67	60.21	15.44	15.0701	93.7772	6.22275
Rnh1	Rnh1-204	ENSMUSG00000038650|ENSMUST00000210314	432	146.527	99.16	739.74	27.42	29.61	14.7098	93.6345	6.36545
Acad11	Acad11-201	ENSMUSG00000090150|ENSMUST00000047799	695	146.467	556.99	144.03	633.67	298.5	0.75203	42.9234	57.0766
Fdft1	Fdft1-204	ENSMUSG00000021273|ENSMUST00000224625	231	146.367	502.1	298.86	148.78	108.66	3.11125	75.6765	24.3235
Ndufs1	Ndufs1-201	ENSMUSG00000025968|ENSMUST00000027111	657	146.217	315.78	337.22	57.59	68.08	5.19615	83.8609	16.1391
Tkfc	Tkfc-201	ENSMUSG00000034371|ENSMUST00000037678	489	145.848	1623.18	908.14	273.83	249.93	4.83298	82.8561	17.1439
Gcdh	Gcdh-201	ENSMUSG00000003809|ENSMUST00000003907	305	145.821	571.25	493.48	722.98	1360.95	0.510924	33.8153	66.1847
Abcd3	Abcd3-201	ENSMUSG00000028127|ENSMUST00000029770	107	145.573	1125.79	971.28	430.11	594.12	2.04746	67.1858	32.8142
Iqgap2	Iqgap2-201	ENSMUSG00000021676|ENSMUST00000068603	1536	145.447	183.22	403.56	60	88.94	3.93971	79.7559	20.2441
Acsf2	Acsf2-201	ENSMUSG00000076435|ENSMUST00000103164	120	145.411	1018.44	111.19	243.29	122.58	3.08752	75.5353	24.4647
Urod	Urod-201	ENSMUSG00000028684|ENSMUST00000030446	221	145.39	305.9	249.38	226.68	98.76	1.70624	63.0484	36.9516
U2af1	U2af1-202	ENSMUSG00000061613|ENSMUST00000166526	158	145.155	404.28	386.42	24.86	36.63	12.859	92.7845	7.21553
Gpt	Gpt-201	ENSMUSG00000022546|ENSMUST00000023203	304	144.991	1070	423.86	214.89	146.3	4.13594	80.5294	19.4706
Vcp	Vcp-201	ENSMUSG00000028452|ENSMUST00000030164	150	144.95	1165.12	936.32	131.04	50.85	11.5534	92.034	7.966
Ndufab1	Ndufab1-203	ENSMUSG00000030869|ENSMUST00000123296	150	144.949	553.36	403.63	494	380.79	1.09397	52.2437	47.7563
Mut	Mut-201	ENSMUSG00000023921|ENSMUST00000169611	561	144.854	308.88	325.03	16.57	136.63	4.13779	80.5364	19.4636
Mut	Mut-201	ENSMUSG00000023921|ENSMUST00000169611	12	144.826	114.07	247.47	264.47	174.08	0.824399	45.1874	54.8126
Aco1	Aco1-201	ENSMUSG00000028405|ENSMUST00000102973	71	144.155	115.96	400.91	210.22	811.97	0.50565	33.5835	66.4165
Ugt2b5	Ugt2b5-201	ENSMUSG00000054630|ENSMUST00000067790	515	144.134	1841.26	934.7	889.72	411.55	2.13327	68.0845	31.9155
Lgals9	Lgals9-202	ENSMUSG00000001123|ENSMUST00000108268	289	144.015	850.93	439.04	3888.67	898.39	0.26947	21.227	78.773
Atp6v1e1	Atp6v1e1-201	ENSMUSG00000019210|ENSMUST00000019354	97	143.876	156.73	342.94	432.35	427.11	0.581377	36.764	63.236
Calr	Calr-201	ENSMUSG00000003814|ENSMUST00000003912	160	143.568	1675.22	2095.44	3365.72	3474.89	0.551217	35.5345	64.4655
Lypla1	Lypla1-201	ENSMUSG00000025903|ENSMUST00000027036	42	143.449	193.69	7.96	471.91	92.84	0.357061	26.3113	73.6887
Dnaja1	Dnaja1-201	ENSMUSG00000028410|ENSMUST00000030118	15	143.395	500.44	349.37	1221.12	795.67	0.421368	29.6452	70.3548
Id3	Id3-201	ENSMUSG00000007872|ENSMUST00000008016	113	142.949	103.68	262.17	999.1	799.35	0.203425	16.9038	83.0962
Aass	Aass-201	ENSMUSG00000029695|ENSMUST00000031707	210	142.82	452.82	118.37	411.02	209.76	0.920117	47.9198	52.0802
Lap3	Lap3-201	ENSMUSG00000039682|ENSMUST00000046122	263	142.735	351.81	612.22	1139.21	484.74	0.593633	37.2503	62.7497
Gabarap	Gabarap-201	ENSMUSG00000018567|ENSMUST00000018711	18	142.512	645.98	964.4	1244.19	1929.97	0.507341	33.658	66.342
Cmbl	Cmbl-201	ENSMUSG00000022235|ENSMUST00000070918	156	142.511	344.52	196	260.9	127.71	1.39091	58.1749	41.8251
Clu	Clu-201	ENSMUSG00000022037|ENSMUST00000022616	447	142.319	6355.3	3313.14	4842.27	3120.79	1.21416	54.8362	45.1638
C6	C6-204	ENSMUSG00000022181|ENSMUST00000162585	82	141.927	1064.42	700.9	645.59	571.57	1.45036	59.1897	40.8103
Acss2	Acss2-201	ENSMUSG00000027605|ENSMUST00000029135	566	141.787	311.15	866.21	8.75	74.06	14.2176	93.4287	6.57134
Pdia4	Pdia4-201	ENSMUSG00000025823|ENSMUST00000077290	25	141.734	818.28	241.09	1037.51	235.58	0.832125	45.4186	54.5814
Arl6ip1	Arl6ip1-201	ENSMUSG00000030654|ENSMUST00000032888	63	141.656	648.67	442.6	43.28	106.8	7.27126	87.9099	12.0901
Msmo1	Msmo1-201	ENSMUSG00000031604|ENSMUST00000034015	202	141.527	659.88	636.94	78.07	109.26	6.92265	87.378	12.622
Mup7	Mup7-203	ENSMUSG00000073842|ENSMUST00000166098	53	141.508	36847.9	38858.6	18543.3	3818.23	3.38557	77.1979	22.8021
Oat	Oat-201	ENSMUSG00000030934|ENSMUST00000084500	384	140.95	159.11	191.05	2288.68	2971.62	0.0665665	6.2412	93.7588
Decr1	Decr1-201	ENSMUSG00000028223|ENSMUST00000029877	157	140.526	68.87	508.08	271.62	884.2	0.499169	33.2964	66.7036
Cpt2	Cpt2-201	ENSMUSG00000028607|ENSMUST00000030345	262	140.458	178.76	51.89	670.69	59.55	0.315855	24.0038	75.9962
Oat	Oat-201	ENSMUSG00000030934|ENSMUST00000084500	391	140.427	1816.7	1359.3	712.57	1088.53	1.76337	63.8123	36.1877
Cstb	Cstb-201	ENSMUSG00000005054|ENSMUST00000005185	93	140.294	51.24	54.45	397.7	486.45	0.119539	10.6775	89.3225
Arg1	Arg1-201	ENSMUSG00000019987|ENSMUST00000020161	178	139.721	8215.86	2707.43	5899.95	2508.54	1.29908	56.5043	43.4957
Uqcrc2	Uqcrc2-201	ENSMUSG00000030884|ENSMUST00000033176	337	139.11	909.58	586.39	458.38	168.7	2.38561	70.4632	29.5368
Psma4	Psma4-201	ENSMUSG00000032301|ENSMUST00000034848	221	139.071	619.01	616.89	107.26	46.58	8.03367	88.9303	11.0697
Mup20	Mup20-201	ENSMUSG00000078672|ENSMUST00000074018	19	138.754	2122.33	2963.7	58295	147268	0.024742	2.41446	97.5855
Glo1	Glo1-201	ENSMUSG00000024026|ENSMUST00000024823	77	138.571	2671.33	2759.36	865.89	931.9	3.02076	75.1291	24.8709
Tmem30a	Tmem30a-201	ENSMUSG00000032328|ENSMUST00000034878	325	138.33	575.95	355.73	81.69	48.11	7.17781	87.7718	12.2282
Ndufb4	Ndufb4-201	ENSMUSG00000022820|ENSMUST00000023514	53	138.302	1285.72	287.19	316.78	58.92	4.18661	80.7196	19.2804
Dbt	Dbt-201	ENSMUSG00000000340|ENSMUST00000000349	450	138.283	259.52	66.67	160.29	52.2	1.53508	60.5536	39.4464
4931406C07Rik	4931406C07Rik-203	ENSMUSG00000031938|ENSMUST00000180339	274	138.08	572.35	149.89	4.73	23.29	25.7759	96.2653	3.73471
Pebp1	Pebp1-201	ENSMUSG00000032959|ENSMUST00000036951	78	138.047	234.79	1243.9	35.98	284.79	4.60981	82.1741	17.8259
Bhmt2	Bhmt2-201	ENSMUSG00000042118|ENSMUST00000015941	190	137.968	662.75	495.89	298.6	172.89	2.4574	71.0765	28.9235
Mthfd1	Mthfd1-201	ENSMUSG00000021048|ENSMUST00000021443	55	137.84	175.79	9.78	990.1	290.29	0.144932	12.6586	87.3414
Mup9	Mup9-202	ENSMUSG00000078686|ENSMUST00000118759	160	137.445	10910.4	11899.8	1404.42	1698.76	7.35059	88.0248	11.9752
Rpl7	Rpl7-201	ENSMUSG00000043716|ENSMUST00000058437	16	137.246	110.68	113.71	1062.02	1394.25	0.091354	8.3707	91.6293
Glul	Glul-201	ENSMUSG00000026473|ENSMUST00000086199	242	137.184	1857.4	2672.71	181.96	721.98	5.01152	83.3653	16.6347
Hspa8	Hspa8-201	ENSMUSG00000015656|ENSMUST00000015800	252	136.945	130.23	221.09	1020.62	5728.81	0.0520518	4.94765	95.0524
Ehhadh	Ehhadh-201	ENSMUSG00000022853|ENSMUST00000023559	165	136.785	709.53	445.67	162.97	89.26	4.57995	82.0787	17.9213
Pdcd4	Pdcd4-202	ENSMUSG00000024975|ENSMUST00000074371	74	136.578	526.15	319.14	38.38	29.39	12.4729	92.5777	7.42229
Gpam	Gpam-201	ENSMUSG00000024978|ENSMUST00000061856	289	136.523	283.24	388.67	29.58	1.98	21.2899	95.5137	4.48633
Atp5g1	Atp5g1-201	ENSMUSG00000006057|ENSMUST00000090541	15	136.436	700.86	1461.61	498.31	1208.44	1.26701	55.889	44.111
Eif3c	Eif3c-201	ENSMUSG00000030738|ENSMUST00000032992	34	136.171	462.95	209.97	67.92	18.32	7.80288	88.6401	11.3599
Gne	Gne-201	ENSMUSG00000028479|ENSMUST00000030201	62	136.126	265.91	116.35	211.6	74.81	1.33466	57.1672	42.8328
Kyat3	Kyat3-202	ENSMUSG00000040213|ENSMUST00000106218	396	136.057	82.44	126.19	193.85	734.36	0.224766	18.3517	81.6483
Ubqln1	Ubqln1-201	ENSMUSG00000005312|ENSMUST00000058735	224	136.057	113.32	255.19	136.85	187.05	1.13773	53.2214	46.7786
Sdhb	Sdhb-201	ENSMUSG00000009863|ENSMUST00000010007	238	135.78	2672.53	372.16	237.51	61.76	10.1737	91.0504	8.94957
Ndufs4	Ndufs4-201	ENSMUSG00000021764|ENSMUST00000022286	94	135.763	242.33	587.09	147.07	237.14	2.15877	68.3421	31.6579
Hibch	Hibch-201	ENSMUSG00000041426|ENSMUST00000044478	172	135.528	9.01	2.8	16.7	691.26	0.0166817	1.6408	98.3592
Car3	Car3-201	ENSMUSG00000027559|ENSMUST00000029076	213	135.422	21352.6	13078.1	3316.82	4211.91	4.57324	82.0571	17.9429
Anxa6	Anxa6-202	ENSMUSG00000018340|ENSMUST00000108883	513	135.11	401.88	193.34	307.15	161.37	1.27043	55.9554	44.0446
Rpl15	Rpl15-202	ENSMUSG00000012405|ENSMUST00000080281	175	134.983	1574.14	581.15	41.96	17.6	36.1869	97.3109	2.68912
Deptor	Deptor-202	ENSMUSG00000022419|ENSMUST00000096433	234	134.898	71.5	255.24	196.25	355.44	0.592253	37.1959	62.8041
Dnajc3	Dnajc3-201	ENSMUSG00000022136|ENSMUST00000022734	320	134.3	230.03	227.61	560.35	427.88	0.463091	31.6515	68.3485
Ran	Ran-202	ENSMUSG00000029430|ENSMUST00000111343	148	133.837	541.54	312.36	112.2	146.01	3.307	76.782	23.218
Sdha	Sdha-201	ENSMUSG00000021577|ENSMUST00000022062	382	133.834	1855.38	895.55	63.25	43.75	25.7096	96.256	3.74397
Cpt2	Cpt2-201	ENSMUSG00000028607|ENSMUST00000030345	124	133.627	422.21	91.09	382.22	39.07	1.2184	54.9225	45.0775
Hadha	Hadha-205	ENSMUSG00000025745|ENSMUST00000156859	78	133.564	405.85	285.43	473.84	333.99	0.855725	46.1127	53.8873
Ces3b	Ces3b-202	ENSMUSG00000062181|ENSMUST00000093221	34	133.374	468.92	610.77	713.92	1130.86	0.585268	36.9192	63.0808
Gm4951	Gm4951-201	ENSMUSG00000073555|ENSMUST00000031549	171	133.021	365.47	378.68	16.53	17.14	22.1013	95.6712	4.32877
Pzp	Pzp-201	ENSMUSG00000030359|ENSMUST00000112132	280	132.904	1009	1476.84	7572.71	14033.2	0.115054	10.3182	89.6818
Glo1	Glo1-201	ENSMUSG00000024026|ENSMUST00000024823	176	132.855	154.14	718.9	5681.5	465.45	0.142028	12.4365	87.5635
Cpt1a	Cpt1a-201	ENSMUSG00000024900|ENSMUST00000025835	506	132.779	356.89	350.73	332.27	559.79	0.793243	44.2351	55.7649
Urod	Urod-201	ENSMUSG00000028684|ENSMUST00000030446	25	132.604	229.97	150.37	345.42	54.03	0.952159	48.7747	51.2253
Tdo2	Tdo2-201	ENSMUSG00000028011|ENSMUST00000029645	280	132.454	11348.7	2206.56	497	454.96	14.2393	93.438	6.56196
Oat	Oat-201	ENSMUSG00000030934|ENSMUST00000084500	383	132.379	2157.04	1201.96	1070.68	810.73	1.78536	64.098	35.902
Sult2a8	Sult2a8-203	ENSMUSG00000030378|ENSMUST00000168252	52	132.043	206.03	71.33	1646.9	4801.63	0.0430114	4.12377	95.8762
Mup3	Mup3-202	ENSMUSG00000066154|ENSMUST00000107472	83	132.042	4183.48	2297.42	81999.7	22118.5	0.0622456	5.85981	94.1402
Ghr	Ghr-201	ENSMUSG00000055737|ENSMUST00000069451	59	131.824	343.12	567.97	36.77	0	24.7781	96.1207	3.87926
Pygl	Pygl-201	ENSMUSG00000021069|ENSMUST00000071250	379	131.753	1203.61	1107.97	155.61	251.77	5.67426	85.0171	14.9829
Sec13	Sec13-201	ENSMUSG00000030298|ENSMUST00000032440	282	131.545	154.15	92.24	318.05	102.79	0.585472	36.9273	63.0727
Oaz1	Oaz1-201	ENSMUSG00000035242|ENSMUST00000060987	19	131.533	29.64	30.28	515.22	443.72	0.0624857	5.88108	94.1189
Fah	Fah-201	ENSMUSG00000030630|ENSMUST00000032865	138	131.521	3045.38	2510.16	167.89	255.89	13.1095	92.9126	7.08743
Kyat1	Kyat1-201	ENSMUSG00000039648|ENSMUST00000044038	412	131.414	112.96	79.26	231.57	310.46	0.35463	26.1791	73.8209
Caprin1	Caprin1-201	ENSMUSG00000027184|ENSMUST00000028607	233	130.839	178.46	460.37	3.68	57.93	10.3689	91.2041	8.7959
Acox1	Acox1-201	ENSMUSG00000020777|ENSMUST00000066587	197	130.793	4076.46	2332.45	1790.62	1221.63	2.12762	68.0268	31.9732
Serpina10	Serpina10-201	ENSMUSG00000061947|ENSMUST00000044231	360	130.734	77.62	17.73	881.24	248.27	0.0844171	7.78456	92.2154
Fasn	Fasn-201	ENSMUSG00000025153|ENSMUST00000055655	517	130.509	251.85	626.78	269.02	183.35	1.94228	66.0128	33.9872
Manf	Manf-202	ENSMUSG00000032575|ENSMUST00000159283	25	130.486	1439.19	203.3	297.4	265.03	2.92035	74.492	25.508
Sucla2	Sucla2-203	ENSMUSG00000022110|ENSMUST00000160507	380	130.373	280.93	313	163.54	192.69	1.66727	62.5084	37.4916
Hoga1	Hoga1-201	ENSMUSG00000025176|ENSMUST00000081714	193	130.37	274.95	337.03	74.6	29.25	5.89292	85.4924	14.5076
Glyat	Glyat-201	ENSMUSG00000063683|ENSMUST00000044976	112	130.323	450.17	490.98	1466.61	1534.04	0.313649	23.8761	76.1239
Ly6e	Ly6e-210	ENSMUSG00000022587|ENSMUST00000188866	43	130.215	237.42	1829.08	437.92	4077.49	0.457655	31.3967	68.6033
Psen2	Psen2-204	ENSMUSG00000010609|ENSMUST00000111106	383	130.119	278.9	343.99	57.88	32.55	6.88809	87.3227	12.6773
Gstm2	Gstm2-201	ENSMUSG00000040562|ENSMUST00000012348	22	130.03	110.53	119.6	279.3	240.96	0.442337	30.6681	69.3319
Ndufs4	Ndufs4-201	ENSMUSG00000021764|ENSMUST00000022286	142	130.007	26.4	43.51	272.78	963.96	0.0565276	5.35032	94.6497
Dlst	Dlst-201	ENSMUSG00000004789|ENSMUST00000053811	259	129.362	413.41	270.41	172.85	166.96	2.01236	66.8034	33.1966
Gdi2	Gdi2-209	ENSMUSG00000021218|ENSMUST00000223396	374	129.341	551.83	1260.61	45.02	74.02	15.2255	93.8369	6.16315
Gapdh	Gapdh-203	ENSMUSG00000057666|ENSMUST00000118875	255	129.217	722.53	1057.33	1013.03	2310.86	0.535475	34.8736	65.1264
Cct5	Cct5-201	ENSMUSG00000022234|ENSMUST00000022842	328	128.847	271.73	268.51	133.8	76.76	2.56573	71.9552	28.0448
Hamp2	Hamp2-203	ENSMUSG00000056978|ENSMUST00000217812	38	128.803	308.57	237.24	78.2	51.86	4.1966	80.7567	19.2433
Gsto1	Gsto1-201	ENSMUSG00000025068|ENSMUST00000026050	144	128.676	64.75	9.77	596.46	172.19	0.0969492	8.83808	91.1619
Got1	Got1-201	ENSMUSG00000025190|ENSMUST00000026196	232	128.495	1095.48	299.07	97.56	77.38	7.97159	88.8537	11.1463
Bdh1	Bdh1-201	ENSMUSG00000046598|ENSMUST00000089759	338	128.4	66.71	46.06	641.31	618.65	0.0895028	8.21502	91.785
Sult2a8	Sult2a8-203	ENSMUSG00000030378|ENSMUST00000168252	21	128.393	320.63	539.7	4253.63	1433.56	0.151275	13.1398	86.8602
Aspdh	Aspdh-201	ENSMUSG00000038704|ENSMUST00000035929	46	128.31	162.72	573.92	7.52	12.29	37.1853	97.3812	2.61881
Gsta3	Gsta3-201	ENSMUSG00000025934|ENSMUST00000027067	103	128.226	15949.1	2135.68	372.55	234.56	29.7884	96.752	3.24798
Gpam	Gpam-201	ENSMUSG00000024978|ENSMUST00000061856	819	128.22	110.35	199.33	187.51	257.06	0.696583	41.058	58.942
Morf4l1	Morf4l1-201	ENSMUSG00000062270|ENSMUST00000085248	22	127.983	608.45	816.82	303.82	26.7	4.31221	81.1754	18.8246
Hsp90ab1	Hsp90ab1-201	ENSMUSG00000023944|ENSMUST00000024739	572	127.928	684.74	464.14	1256.38	1107.03	0.486111	32.7103	67.2897
Stt3a	Stt3a-201	ENSMUSG00000032116|ENSMUST00000120381	415	127.824	16.89	184.17	85.44	448.07	0.376863	27.3711	72.6289
Sod1	Sod1-201	ENSMUSG00000022982|ENSMUST00000023707	66	127.716	861.55	1768.37	2691.07	4258.07	0.378453	27.4549	72.5451
Snap47	Snap47-201	ENSMUSG00000009894|ENSMUST00000010038	323	127.592	76.48	93.52	248.04	410.86	0.258006	20.5091	79.4909
Gm4951	Gm4951-201	ENSMUSG00000073555|ENSMUST00000031549	217	127.532	216.73	81.4	297.89	120.52	0.712531	41.6069	58.3931
Mrps28	Mrps28-201	ENSMUSG00000040269|ENSMUST00000042148	160	127.362	494.87	71.73	24.7	7.96	17.3484	94.5499	5.45006
Anxa7	Anxa7-202	ENSMUSG00000021814|ENSMUST00000100844	279	127.263	285.36	295.42	62.51	35.08	5.95122	85.614	14.386
Atp6v1e1	Atp6v1e1-201	ENSMUSG00000019210|ENSMUST00000019354	186	127.16	447.03	673.06	18.43	19.39	29.6163	96.7338	3.26623
Gstm2	Gstm2-201	ENSMUSG00000040562|ENSMUST00000012348	133	126.965	251.94	146.75	304.01	11.32	1.26436	55.8374	44.1626
Deptor	Deptor-202	ENSMUSG00000022419|ENSMUST00000096433	82	126.791	131.68	67.02	463.95	204.41	0.297295	22.9165	77.0835
Pon1	Pon1-201	ENSMUSG00000002588|ENSMUST00000002663	60	126.657	1710.63	4810.08	346.73	694.89	6.26016	86.2262	13.7738
Cpox	Cpox-201	ENSMUSG00000022742|ENSMUST00000060077	240	126.613	315.88	329.65	42.29	52.97	6.77651	87.1408	12.8592
Ddb1	Ddb1-201	ENSMUSG00000024740|ENSMUST00000025649	892	126.28	135.76	227.96	177.37	294.31	0.771116	43.5384	56.4616
Mup7	Mup7-203	ENSMUSG00000073842|ENSMUST00000166098	52	126.169	32987.4	16268	6837.2	29292.4	1.3633	57.6863	42.3137
Cps1	Cps1-201	ENSMUSG00000025991|ENSMUST00000027144	29	126.056	3036.38	3344.36	4005.58	5563.92	0.666779	40.004	59.996
Psma6	Psma6-201	ENSMUSG00000021024|ENSMUST00000021412	62	125.8	427.38	526.6	254.41	64.63	2.99016	74.9383	25.0617
Glud1	Glud1-201	ENSMUSG00000021794|ENSMUST00000022322	551	125.147	152.18	233.47	2870.57	2722.01	0.0689574	6.45091	93.5491
Acadsb	Acadsb-201	ENSMUSG00000030861|ENSMUST00000015829	202	124.983	679.16	288.34	58.88	23.79	11.7032	92.1279	7.87206
Hadha	Hadha-205	ENSMUSG00000025745|ENSMUST00000156859	653	124.952	134.85	54.49	1196.09	279.44	0.12832	11.3727	88.6273
Cpt1a	Cpt1a-201	ENSMUSG00000024900|ENSMUST00000025835	368	124.927	154.02	1125.6	57.2	190.6	5.16392	83.7766	16.2234
Hnrnpa3	Hnrnpa3-203	ENSMUSG00000059005|ENSMUST00000111962	158	124.901	204.41	325.87	88.92	133.55	2.3836	70.4457	29.5543
Aldh1l1	Aldh1l1-203	ENSMUSG00000030088|ENSMUST00000130418	711	124.889	712.66	1979.88	933.23	1478.59	1.11639	52.7498	47.2502
Acaa1a	Acaa1a-201	ENSMUSG00000036138|ENSMUST00000039784	233	124.813	337.24	206.44	234.89	92.93	1.65847	62.3844	37.6156
Hspe1	Hspe1-201	ENSMUSG00000073676|ENSMUST00000075242	23	124.746	1335.74	800.69	326.68	275.99	3.54494	77.9975	22.0025
Glul	Glul-201	ENSMUSG00000026473|ENSMUST00000086199	240	124.74	1978.79	1495.67	264.15	331.7	5.8311	85.3611	14.6389
Ugt2b35	Ugt2b35-201	ENSMUSG00000035811|ENSMUST00000031186	29	124.547	580.43	543.18	64.93	101.44	6.75368	87.1029	12.8971
Fasn	Fasn-201	ENSMUSG00000025153|ENSMUST00000055655	2448	124.535	448.96	344.1	341.36	138.65	1.65217	62.2951	37.7049
Hpgd	Hpgd-201	ENSMUSG00000031613|ENSMUST00000034026	16	124.231	387.68	89.28	229.78	214.87	1.07266	51.7529	48.2471
Aass	Aass-201	ENSMUSG00000029695|ENSMUST00000031707	77	123.986	551	236.31	193.53	272.15	1.69067	62.8345	37.1655
Tdo2	Tdo2-201	ENSMUSG00000028011|ENSMUST00000029645	326	123.934	1428.74	2953.79	2826.56	6524.8	0.468652	31.9103	68.0897
Pcx	Pcx-201	ENSMUSG00000024892|ENSMUST00000068004	1082	123.831	309.35	175.66	613.85	388.36	0.48394	32.6119	67.3881
Eef1g	Eef1g-201	ENSMUSG00000071644|ENSMUST00000052248	81	123.682	316.83	239.37	14.78	1.98	33.1862	97.0748	2.92516
Aadat	Aadat-201	ENSMUSG00000057228|ENSMUST00000079472	79	123.641	549.94	347.77	61.58	42.37	8.63598	89.6222	10.3778
Ces3b	Ces3b-202	ENSMUSG00000062181|ENSMUST00000093221	184	123.627	1545.95	1174.95	2.35	14.2	164.405	99.3954	0.604577
Ephx1	Ephx1-201	ENSMUSG00000038776|ENSMUST00000036928	22	123.52	738.08	479.56	2197.74	157.76	0.516935	34.0776	65.9224
Gpd1	Gpd1-201	ENSMUSG00000023019|ENSMUST00000023760	336	123.216	249.26	344.15	790.32	910.63	0.34887	25.8639	74.1361
Blvrb	Blvrb-201	ENSMUSG00000040466|ENSMUST00000037399	54	122.534	135.87	25.21	1422.91	199.3	0.0992966	9.03274	90.9673
Cpt1a	Cpt1a-201	ENSMUSG00000024900|ENSMUST00000025835	319	122.455	691.76	138.22	367.04	144.44	1.6227	61.8714	38.1286
Ido2	Ido2-201	ENSMUSG00000031549|ENSMUST00000121992	327	122.414	131.39	168.06	207.07	134.95	0.875534	46.6818	53.3182
Ndufb2	Ndufb2-205	ENSMUSG00000002416|ENSMUST00000135671	99	122.19	732.47	40.9	0	0	#DIV/0!	100	0
Ugt3a2	Ugt3a2-201	ENSMUSG00000049152|ENSMUST00000072403	54	122.142	263.48	591	653.2	1256.47	0.447449	30.9129	69.0871
Hyou1	Hyou1-201	ENSMUSG00000032115|ENSMUST00000066601	818	121.964	604.51	151.86	95.82	32.36	5.90084	85.509	14.491
Gm4951	Gm4951-201	ENSMUSG00000073555|ENSMUST00000031549	346	121.918	230.13	90.44	299.57	158.71	0.699507	41.1594	58.8406
Agmat	Agmat-201	ENSMUSG00000040706|ENSMUST00000038161	229	121.772	146.09	12.9	452.05	194.65	0.245848	19.7334	80.2666
Lifr	Lifr-201	ENSMUSG00000054263|ENSMUST00000067190	668	121.604	712.82	320.34	28.98	11.47	25.5417	96.2323	3.76766
Fmo5	Fmo5-202	ENSMUSG00000028088|ENSMUST00000107049	107	121.593	3301.24	1162.83	536.43	410.51	4.71421	82.4998	17.5002
Otc	Otc-201	ENSMUSG00000031173|ENSMUST00000049910	162	121.508	5020.74	1773.17	107.09	154.7	25.9518	96.2897	3.71033
Hspa8	Hspa8-201	ENSMUSG00000015656|ENSMUST00000015800	136	121.483	185.08	632.44	2953.7	2503.52	0.149805	13.0287	86.9713
Acat1	Acat1-201	ENSMUSG00000032047|ENSMUST00000034547	77	121.411	1534.62	835.37	267.46	66.76	7.09111	87.6408	12.3592
Cyp1a2	Cyp1a2-201	ENSMUSG00000032310|ENSMUST00000034860	40	121.385	469.95	3302.35	1509.2	990.6	1.50904	60.1441	39.8559
Cct4	Cct4-204	ENSMUSG00000007739|ENSMUST00000173867	114	121.235	280.65	203.78	52.01	65.45	4.12421	80.4848	19.5152
Hsbp1	Hsbp1-201	ENSMUSG00000031839|ENSMUST00000034300	36	121.15	159.91	414.94	187.05	341.65	1.08729	52.091	47.909
Elovl6	Elovl6-205	ENSMUSG00000041220|ENSMUST00000199910	125	121.097	203.33	144.76	359.91	57.15	0.834628	45.493	54.507
Idh1	Idh1-201	ENSMUSG00000025950|ENSMUST00000097709	80	121.05	1307.32	442.43	2275.52	933.12	0.545324	35.2887	64.7113
Vps25	Vps25-205	ENSMUSG00000078656|ENSMUST00000121331	15	120.919	63.76	230.23	125.43	246.83	0.789744	44.1261	55.8739
Iigp1	Iigp1-201	ENSMUSG00000054072|ENSMUST00000032473	50	120.635	694.26	295.69	614.39	392.52	0.983156	49.5753	50.4247
Aass	Aass-201	ENSMUSG00000029695|ENSMUST00000031707	354	120.511	122.88	119.52	471.97	465.45	0.258582	20.5455	79.4545
A1cf	A1cf-201	ENSMUSG00000052595|ENSMUST00000075838	568	120.499	253.23	66.24	241.75	13.06	1.25376	55.6297	44.3703
Cfh	Cfh-202	ENSMUSG00000026365|ENSMUST00000111976	508	120.498	187.67	671.69	1450.06	1382.18	0.303421	23.2788	76.7212
Ndufb3	Ndufb3-201	ENSMUSG00000026032|ENSMUST00000027193	24	120.343	306.44	454.69	1172.59	359.34	0.496844	33.1928	66.8072
Leap2	Leap2-201	ENSMUSG00000036216|ENSMUST00000036045	54	119.916	581.68	722.29	376.1	371.63	1.7439	63.5556	36.4444
Slc38a3	Slc38a3-201	ENSMUSG00000010064|ENSMUST00000010208	434	119.901	1456.06	553.6	4256.88	1576.1	0.344534	25.6248	74.3752
Adh1	Adh1-201	ENSMUSG00000074207|ENSMUST00000004232	125	119.676	6152.45	5371.71	2564.52	2529.61	2.26224	69.3462	30.6538
Clec2d	Clec2d-201	ENSMUSG00000030157|ENSMUST00000032260	150	119.667	1506.3	84.36	78.93	67.12	10.8912	91.5904	8.40958
Rpl21	Rpl21-202	ENSMUSG00000041453|ENSMUST00000075453	32	119.603	326.85	190.79	173.16	388.13	0.922233	47.9772	52.0228
Psmb1	Psmb1-201	ENSMUSG00000014769|ENSMUST00000014913	155	119.403	359.28	289.54	686.83	624.03	0.494958	33.1085	66.8915
Acad11	Acad11-201	ENSMUSG00000090150|ENSMUST00000047799	133	119.237	488.75	793.06	48.13	35.72	15.2869	93.8601	6.13989
Uox	Uox-201	ENSMUSG00000028186|ENSMUST00000029837	124	119.218	652.44	201.51	20386.7	3949.01	0.0350905	3.39009	96.6099
Lect2	Lect2-201	ENSMUSG00000021539|ENSMUST00000062806	43	119.174	260.33	241.44	186.89	426.03	0.818655	45.0143	54.9857
Idh1	Idh1-201	ENSMUSG00000025950|ENSMUST00000097709	232	118.903	2413.42	1442.36	839.89	433.42	3.02815	75.1747	24.8253
Gstm6	Gstm6-205	ENSMUSG00000068762|ENSMUST00000106685	39	118.901	95.65	128.46	375	473.76	0.264044	20.8888	79.1112
Actr2	Actr2-201	ENSMUSG00000020152|ENSMUST00000000137	183	118.846	395.26	304.92	163.76	27.98	3.65172	78.5026	21.4974
Ftcd	Ftcd-201	ENSMUSG00000001155|ENSMUST00000001183	462	118.839	336.36	754.93	123.84	552.63	1.61321	61.7329	38.2671
Ogdh	Ogdh-201	ENSMUSG00000020456|ENSMUST00000003461	576	118.484	291.11	112.05	167.74	213.79	1.05669	51.3783	48.6217
Slc25a13	Slc25a13-201	ENSMUSG00000015112|ENSMUST00000015256	24	118.458	361.76	59.15	465.2	240.23	0.596672	37.3697	62.6303
Hmgb1	Hmgb1-201	ENSMUSG00000066551|ENSMUST00000085546	142	118.455	174.51	192.45	255.4	451.09	0.519413	34.1851	65.8149
Lect2	Lect2-201	ENSMUSG00000021539|ENSMUST00000062806	42	118.448	553.69	94.79	299.81	34.99	1.93692	65.9507	34.0493
Cps1	Cps1-201	ENSMUSG00000025991|ENSMUST00000027144	1154	118.067	4063.76	2437.72	4732.01	3778.12	0.76397	43.3097	56.6903
Psma6	Psma6-201	ENSMUSG00000021024|ENSMUST00000021412	191	118.044	66.07	44.4	635.76	581.69	0.0907388	8.31903	91.681
Rpl15	Rpl15-202	ENSMUSG00000012405|ENSMUST00000080281	78	117.855	548.13	769.78	229.18	304.89	2.46767	71.1622	28.8378
Entpd5	Entpd5-203	ENSMUSG00000021236|ENSMUST00000110272	49	117.796	397.87	382.62	179.5	200.18	2.05565	67.2738	32.7262
Prodh	Prodh-201	ENSMUSG00000003526|ENSMUST00000003620	463	117.724	263.53	304.25	96.93	31.99	4.40413	81.4956	18.5044
Cstb	Cstb-201	ENSMUSG00000005054|ENSMUST00000005185	23	117.527	401.73	314.26	6.31	3.92	69.9892	98.5913	1.40866
Alas1	Alas1-202	ENSMUSG00000032786|ENSMUST00000112524	609	117.371	983.91	935.66	708.89	169.8	2.18458	68.5987	31.4013
Acat3	Acat3-201	ENSMUSG00000062480|ENSMUST00000043923	253	117.176	211.69	116.45	70.17	128.92	1.6482	62.2385	37.7615
Cyp3a11	Cyp3a11-201	ENSMUSG00000056035|ENSMUST00000035918	422	116.726	13131	3407.22	1819.64	1321.86	5.26445	84.0369	15.9631
Tmem167	Tmem167-203	ENSMUSG00000012422|ENSMUST00000161568	41	116.519	159.96	232.87	155.37	141.85	1.32168	56.9278	43.0722
Aldh3a2	Aldh3a2-202	ENSMUSG00000010025|ENSMUST00000074127	334	116.51	55.55	276.31	73.41	588.68	0.501231	33.388	66.612
Eif2s2	Eif2s2-201	ENSMUSG00000074656|ENSMUST00000099173	31	116.333	194.34	83.17	219.01	195.69	0.669183	40.0904	59.9096
Masp1	Masp1-201	ENSMUSG00000022887|ENSMUST00000089883	524	116.248	430.68	156.55	60.72	7.34	8.62812	89.6138	10.3862
Acadl	Acadl-201	ENSMUSG00000026003|ENSMUST00000027153	221	115.99	133.97	217.08	476.77	699.41	0.298466	22.9861	77.0139
Ldha	Ldha-210	ENSMUSG00000063229|ENSMUST00000209984	328	115.803	1779.04	2876.24	877.66	1071.11	2.38883	70.4913	29.5087
Cbr1	Cbr1-201	ENSMUSG00000051483|ENSMUST00000039659	16	115.612	70.75	32.31	569.94	151.88	0.142778	12.4939	87.5061
Rps9	Rps9-201	ENSMUSG00000006333|ENSMUST00000006496	163	115.492	192.83	79.65	1193.15	133.79	0.205345	17.0362	82.9638
Snrpd2	Snrpd2-201	ENSMUSG00000040824|ENSMUST00000049294	112	115.459	555.41	38.06	54.94	59.22	5.19858	83.8673	16.1327
Blvrb	Blvrb-201	ENSMUSG00000040466|ENSMUST00000037399	78	115.232	207.56	161.34	859.36	406.63	0.291393	22.5642	77.4358
Rhoa	Rhoa-201	ENSMUSG00000007815|ENSMUST00000007959	75	115.15	27.03	223.54	582.35	733.19	0.190469	15.9995	84.0005
Hspa8	Hspa8-201	ENSMUSG00000015656|ENSMUST00000015800	514	115.14	3737.69	975.81	595.85	200.7	5.91739	85.5437	14.4563
Gm4788	Gm4788-203	ENSMUSG00000070594|ENSMUST00000111989	69	115.077	244.61	109.96	724.43	142.13	0.40917	29.0362	70.9638
Car5a	Car5a-201	ENSMUSG00000025317|ENSMUST00000057653	279	115.031	46.23	29.78	540.61	135.11	0.112487	10.1113	89.8887
Fasn	Fasn-201	ENSMUSG00000025153|ENSMUST00000055655	1885	114.979	174.01	405.31	279.92	327.08	0.954399	48.8334	51.1666
Got2	Got2-201	ENSMUSG00000031672|ENSMUST00000034097	46	114.565	2138.21	790.79	708.63	165.43	3.35103	77.0169	22.9831
Acox2	Acox2-204	ENSMUSG00000021751|ENSMUST00000164598	222	114.502	309.5	461.95	94.14	97.85	4.01818	80.0724	19.9276
Hsd17b4	Hsd17b4-201	ENSMUSG00000024507|ENSMUST00000025385	536	114.257	755.46	344.73	644.52	427.81	1.02598	50.6412	49.3588
Hnrnpf	Hnrnpf-210	ENSMUSG00000042079|ENSMUST00000180341	170	114.14	607.88	258.26	252.44	53.26	2.8333	73.9128	26.0872
Kynu	Kynu-201	ENSMUSG00000026866|ENSMUST00000028223	136	114.054	334.1	282.09	261.7	357.78	0.994689	49.8669	50.1331
Vdac1	Vdac1-202	ENSMUSG00000020402|ENSMUST00000102758	137	113.724	1060.52	891.55	268.58	170.63	4.4445	81.6328	18.3672
Dbt	Dbt-201	ENSMUSG00000000340|ENSMUST00000000349	27	113.607	397.03	127.35	41.65	30.78	7.23982	87.8638	12.1362
Aco2	Aco2-201	ENSMUSG00000022477|ENSMUST00000023116	232	113.469	21.02	13.26	491.17	110.8	0.0569464	5.38782	94.6122
Selenok	Selenok-201	ENSMUSG00000042682|ENSMUST00000112268	44	113.445	407.52	505.04	31.36	29.74	14.9355	93.7247	6.27529
Ldha	Ldha-210	ENSMUSG00000063229|ENSMUST00000209984	167	113.371	671.32	3019.48	320.71	2353.14	1.38033	57.989	42.011
Iigp1	Iigp1-201	ENSMUSG00000054072|ENSMUST00000032473	128	113.37	561.47	336.64	703.37	335.25	0.864715	46.3725	53.6275
Aldh7a1	Aldh7a1-208	ENSMUSG00000053644|ENSMUST00000174518	338	113.246	234.74	1719.24	195.06	1001.16	1.63346	62.0272	37.9728
Hdlbp	Hdlbp-202	ENSMUSG00000034088|ENSMUST00000170883	13	112.967	78.44	40.13	437.89	419.56	0.138282	12.1483	87.8517
Rpl17	Rpl17-201	ENSMUSG00000062328|ENSMUST00000079716	50	112.966	315.73	504.36	40.36	29.35	11.7643	92.1657	7.83434
Ugt2b5	Ugt2b5-201	ENSMUSG00000054630|ENSMUST00000067790	524	112.951	612.94	1016.5	623.92	525.05	1.41817	58.6465	41.3535
Grpel1	Grpel1-201	ENSMUSG00000029198|ENSMUST00000031099	47	112.947	564.08	257.64	165.08	126.6	2.8172	73.8028	26.1972
Ephx2	Ephx2-202	ENSMUSG00000022040|ENSMUST00000224698	345	112.813	2450.79	1928.7	258.57	396.31	6.68747	86.9918	13.0082
Park7	Park7-201	ENSMUSG00000028964|ENSMUST00000030805	81	112.671	389.02	667.22	201.9	645.39	1.24661	55.4885	44.5115
Adh1	Adh1-201	ENSMUSG00000074207|ENSMUST00000004232	243	112.604	3457.57	14339.7	191.13	267.49	38.8062	97.4878	2.51217
Pon1	Pon1-201	ENSMUSG00000002588|ENSMUST00000002663	42	112.483	2416.79	3661.86	124.83	121.33	24.6939	96.108	3.89197
Phb	Phb-204	ENSMUSG00000038845|ENSMUST00000125172	137	112.463	70.87	950.7	19.51	73.19	11.0202	91.6807	8.31935
Prdx3	Prdx3-201	ENSMUSG00000024997|ENSMUST00000025961	51	112.427	72.72	1068.76	2.8	57.82	18.8301	94.9572	5.04284
Selenbp2	Selenbp2-201	ENSMUSG00000068877|ENSMUST00000090848	22	112.415	175.89	92.69	2349.08	1006.67	0.0800358	7.41047	92.5895
Gpd1	Gpd1-201	ENSMUSG00000023019|ENSMUST00000023760	52	112.332	1083.81	810.05	78.76	53.96	14.2696	93.451	6.54896
Amdhd1	Amdhd1-201	ENSMUSG00000015890|ENSMUST00000016034	22	112.287	452.65	265.93	345.85	139.77	1.47972	59.6728	40.3272
Cat	Cat-201	ENSMUSG00000027187|ENSMUST00000028610	204	112.244	10949.7	3469.4	621.08	370.56	14.5406	93.5653	6.43474
Ttpa	Ttpa-202	ENSMUSG00000073988|ENSMUST00000117632	45	111.985	558.52	401.53	41.41	48.74	10.6495	91.4159	8.58408
Tmem50a	Tmem50a-201	ENSMUSG00000028822|ENSMUST00000030626	76	111.936	348.01	409.75	44.04	49.15	8.13134	89.0487	10.9513
Hmgb1	Hmgb1-201	ENSMUSG00000066551|ENSMUST00000085546	123	111.857	475.47	374.13	52.19	88.77	6.02724	85.7697	14.2303
Ywhag	Ywhag-201	ENSMUSG00000051391|ENSMUST00000055808	22	111.835	385.66	273.69	230.31	195.49	1.5485	60.7612	39.2388
Tkt	Tkt-201	ENSMUSG00000021957|ENSMUST00000022529	578	111.825	136.46	630.65	19.91	121.53	5.42357	84.4323	15.5677
Pcbp2	Pcbp2-201	ENSMUSG00000056851|ENSMUST00000077037	293	111.77	349.09	60.54	190.31	134.14	1.26254	55.8018	44.1982
Mdh1	Mdh1-201	ENSMUSG00000020321|ENSMUST00000102874	264	111.698	1562.7	5198.67	133.06	318.13	14.9856	93.7444	6.25562
Atp6v1g1	Atp6v1g1-201	ENSMUSG00000039105|ENSMUST00000035301	86	111.666	184.61	73.01	246.5	226.93	0.544156	35.2397	64.7603
Oaz1	Oaz1-201	ENSMUSG00000035242|ENSMUST00000060987	15	111.649	367.99	303.96	27.17	31.09	11.5336	92.0215	7.97853
Itih2	Itih2-201	ENSMUSG00000037254|ENSMUST00000042290	847	111.488	2873.6	570.9	24.88	15.55	85.1966	98.8399	1.16014
Khk	Khk-204	ENSMUSG00000029162|ENSMUST00000201621	257	111.402	620.68	1036.82	415.84	613.41	1.6104	61.6916	38.3084
Csad	Csad-201	ENSMUSG00000023044|ENSMUST00000023805	423	111.311	680.7	788.56	392.36	424.21	1.79931	64.2769	35.7231
Hsd11b1	Hsd11b1-201	ENSMUSG00000016194|ENSMUST00000016338	99	111.237	1331.11	2895.38	42.04	183	18.7811	94.9447	5.05534
Atp5b	Atp5b-201	ENSMUSG00000025393|ENSMUST00000026459	482	111.088	2622.56	1587.11	1875.87	471.25	1.79355	64.2032	35.7968
Psmc6	Psmc6-201	ENSMUSG00000021832|ENSMUST00000022380	18	110.965	499.22	125.52	17.24	7.26	25.4996	96.2264	3.77364
Rpl28	Rpl28-202	ENSMUSG00000030432|ENSMUST00000078432	30	110.961	646.96	229.54	616.68	23.26	1.36966	57.7998	42.2002
Rpl6	Rpl6-201	ENSMUSG00000029614|ENSMUST00000031617	107	110.467	796.4	433.31	52.71	91.24	8.54262	89.5207	10.4793
Pah	Pah-201	ENSMUSG00000020051|ENSMUST00000020241	214	110.345	3714.78	1724.45	1506.03	1040.79	2.13569	68.1091	31.8909
Hgd	Hgd-203	ENSMUSG00000022821|ENSMUST00000160847	152	110.195	2155.09	978.62	310.91	232.06	5.77142	85.2321	14.7679
Arl1	Arl1-202	ENSMUSG00000060904|ENSMUST00000116234	101	110.183	183.77	297.07	26.46	27.95	8.83735	89.8347	10.1653
Acsl1	Acsl1-203	ENSMUSG00000018796|ENSMUST00000110372	17	110.079	888.88	2876.64	179.17	471.3	5.78892	85.2701	14.7299
Cdo1	Cdo1-201	ENSMUSG00000033022|ENSMUST00000035804	126	109.934	2094.13	1532.58	3687.1	1766.27	0.66504	39.9414	60.0586
Dnaja1	Dnaja1-201	ENSMUSG00000028410|ENSMUST00000030118	299	109.931	965.67	265.67	496.89	411.55	1.35544	57.5452	42.4548
Ugt1a1	Ugt1a1-201	ENSMUSG00000089960|ENSMUST00000073049	30	109.882	1434.56	600.91	60.22	88.57	13.6802	93.1881	6.81192
Serpina1c	Serpina1c-201	ENSMUSG00000079015|ENSMUST00000074051	310	109.836	8862.84	1280.32	1991.77	129.48	4.78169	82.704	17.296
Pipox	Pipox-201	ENSMUSG00000017453|ENSMUST00000017597	16	109.833	4.8	7.26	240.63	1753.4	0.00604805	0.601169	99.3988
Hspa8	Hspa8-201	ENSMUSG00000015656|ENSMUST00000015800	383	109.817	2559.41	762.87	1403.12	509.76	1.73679	63.4609	36.5391
Dynlrb1	Dynlrb1-204	ENSMUSG00000047459|ENSMUST00000150602	35	109.702	125.08	344.62	140.27	205.61	1.35799	57.5909	42.4091
Rdh7	Rdh7-201	ENSMUSG00000040134|ENSMUST00000047199	130	109.611	1680.41	2840.01	512.76	2197.99	1.66759	62.513	37.487
Shmt1	Shmt1-201	ENSMUSG00000020534|ENSMUST00000018744	21	109.58	751.58	358.3	7.62	11.75	57.2989	98.2847	1.7153
Fh1	Fh1-201	ENSMUSG00000026526|ENSMUST00000027810	59	109.334	451.79	610.53	126.94	131.37	4.11258	80.4404	19.5596
Scp2	Scp2-201	ENSMUSG00000028603|ENSMUST00000030340	29	109.188	3943.77	8523.97	2004.25	7876.82	1.26178	55.787	44.213
Cyp2c44	Cyp2c44-201	ENSMUSG00000025197|ENSMUST00000026211	223	108.999	1633.83	477.12	43.01	4.62	44.3198	97.7935	2.20654
Pfdn5	Pfdn5-205	ENSMUSG00000001289|ENSMUST00000166658	74	108.859	344.32	241.93	8.97	8.75	33.0841	97.0661	2.93392
Rps23	Rps23-201	ENSMUSG00000049517|ENSMUST00000051955	20	108.833	402.01	265.25	215.5	46.94	2.54252	71.7715	28.2285
Uqcrfs1	Uqcrfs1-201	ENSMUSG00000038462|ENSMUST00000042834	215	108.801	392.15	480.11	666.92	115.55	1.11475	52.7131	47.2869
Dhcr24	Dhcr24-201	ENSMUSG00000034926|ENSMUST00000047973	469	108.662	19.81	107.72	791.04	961.46	0.0727703	6.7834	93.2166
Glul	Glul-201	ENSMUSG00000026473|ENSMUST00000086199	269	108.626	2621.74	737.68	339.38	212.42	6.08811	85.8919	14.1081
Ndufa3	Ndufa3-201	ENSMUSG00000035674|ENSMUST00000076657	61	108.587	109.24	1349.47	37.74	607.37	2.26118	69.3363	30.6637
H2-K1	H2-K1-205	ENSMUSG00000061232|ENSMUST00000172912	62	108.219	2049.36	4203.96	59.68	133.9	32.3035	96.9973	3.00268
Psmc6	Psmc6-201	ENSMUSG00000021832|ENSMUST00000022380	174	108.212	76.95	50.69	283.33	342.42	0.203979	16.9421	83.0579
Vapa	Vapa-201	ENSMUSG00000024091|ENSMUST00000024897	137	107.887	47.62	72.13	217.87	764.96	0.121842	10.8609	89.1391
Dnaja3	Dnaja3-201	ENSMUSG00000004069|ENSMUST00000060067	236	107.867	420.09	76.66	12.05	0	41.2241	97.6317	2.36832
Hmgcs1	Hmgcs1-201	ENSMUSG00000093930|ENSMUST00000179869	424	107.836	491.34	484.93	408.45	326.23	1.32884	57.0601	42.9399
Gys2	Gys2-201	ENSMUSG00000030244|ENSMUST00000032371	141	107.828	51.07	295.25	214.57	459.51	0.513767	33.9396	66.0604
Selenot	Selenot-201	ENSMUSG00000075700|ENSMUST00000107924	43	107.785	302.75	186.67	143.37	65.55	2.34262	70.0833	29.9167
Alas1	Alas1-202	ENSMUSG00000032786|ENSMUST00000112524	235	107.779	1616.35	31.82	0	0	#DIV/0!	100	0
Tuba4a	Tuba4a-202	ENSMUSG00000026202|ENSMUST00000186213	31	107.71	22.33	72	296.41	956.02	0.0753176	7.00422	92.9958
Bdh1	Bdh1-201	ENSMUSG00000046598|ENSMUST00000089759	24	107.66	206.04	131.2	442.77	231.14	0.500423	33.3521	66.6479
Cfh	Cfh-202	ENSMUSG00000026365|ENSMUST00000111976	933	107.573	2537.53	333.08	314.22	7.95	8.91023	89.9094	10.0906
Mrpl20	Mrpl20-201	ENSMUSG00000029066|ENSMUST00000030942	68	107.154	330.72	146.37	91.51	78.01	2.81436	73.7833	26.2167
Inmt	Inmt-201	ENSMUSG00000003477|ENSMUST00000003569	34	106.979	1556.25	1050.6	3147.44	1205.8	0.59883	37.4543	62.5457
Ogdh	Ogdh-201	ENSMUSG00000020456|ENSMUST00000003461	148	106.889	175.36	588.49	3.58	0	213.366	99.5335	0.466492
Hsd3b5	Hsd3b5-201	ENSMUSG00000038092|ENSMUST00000044094	171	106.849	82.8	84.35	449.05	400.07	0.196851	16.4474	83.5526
Ephx2	Ephx2-202	ENSMUSG00000022040|ENSMUST00000224698	227	106.68	1738.96	2441.49	234.62	323.87	7.48527	88.2149	11.7851
Creb3l3	Creb3l3-201	ENSMUSG00000035041|ENSMUST00000117422	456	106.651	416.2	667.59	175.53	115.72	3.72117	78.8188	21.1812
Car5a	Car5a-201	ENSMUSG00000025317|ENSMUST00000057653	265	106.623	133.72	289.18	61.61	91.73	2.75792	73.3896	26.6104
Cat	Cat-201	ENSMUSG00000027187|ENSMUST00000028610	251	106.319	6427.59	8178.13	2114.04	1721.36	3.80813	79.2019	20.7981
Asl	Asl-205	ENSMUSG00000025533|ENSMUST00000161094	412	106.319	134.72	66.39	2291.16	1878.14	0.0482359	4.60163	95.3984
Vps25	Vps25-205	ENSMUSG00000078656|ENSMUST00000121331	80	106.284	108.12	106.16	174.04	186.72	0.593968	37.2635	62.7365
Sord	Sord-201	ENSMUSG00000027227|ENSMUST00000110551	149	106.281	1288.34	326.46	6761.33	1995.4	0.184407	15.5695	84.4305
Cyp2c67	Cyp2c67-201	ENSMUSG00000062624|ENSMUST00000067328	314	106.089	113.91	251.72	63.08	288.65	1.03952	50.9688	49.0312
Cyp1a2	Cyp1a2-201	ENSMUSG00000032310|ENSMUST00000034860	500	105.996	3055.81	1824.37	221.02	116.61	14.4542	93.5293	6.47072
Eif2s2	Eif2s2-201	ENSMUSG00000074656|ENSMUST00000099173	100	105.954	81.17	113.89	98.41	253.22	0.554731	35.6802	64.3198
Gys2	Gys2-201	ENSMUSG00000030244|ENSMUST00000032371	702	105.921	21.15	57.76	607.48	307.54	0.0862386	7.93919	92.0608
Nat8f2	Nat8f2-201	ENSMUSG00000033634|ENSMUST00000045008	128	105.911	637.46	575.25	756.96	975.65	0.699932	41.1741	58.8259
Ugp2	Ugp2-202	ENSMUSG00000001891|ENSMUST00000102875	27	105.889	62.47	561.26	239.72	1782.2	0.308484	23.5757	76.4243
Lyz2	Lyz2-201	ENSMUSG00000069516|ENSMUST00000092163	63	105.827	305.38	135.37	527.7	129.89	0.67025	40.1287	59.8713
Rnh1	Rnh1-204	ENSMUSG00000038650|ENSMUST00000210314	409	105.756	47.48	32.72	328.54	255.68	0.137277	12.0707	87.9293
Ppara	Ppara-202	ENSMUSG00000022383|ENSMUST00000109422	137	105.461	244.06	275.74	42.94	41.65	6.14493	86.0041	13.9959
Copa	Copa-206	ENSMUSG00000026553|ENSMUST00000135192	1133	105.337	118.8	221.71	58.46	166.08	1.51648	60.2619	39.7381
Arhgdia	Arhgdia-202	ENSMUSG00000025132|ENSMUST00000106197	193	105.322	51.31	75.65	511.33	257.71	0.165089	14.1696	85.8304
Dnaja1	Dnaja1-201	ENSMUSG00000028410|ENSMUST00000030118	315	105.25	445.03	586.22	482.1	635.45	0.922778	47.9919	52.0081
Ddc	Ddc-210	ENSMUSG00000020182|ENSMUST00000178704	477	105.132	142.37	106.62	149.09	148.02	0.83804	45.5942	54.4058
Sod2	Sod2-201	ENSMUSG00000006818|ENSMUST00000007012	115	105.041	716	840.42	58.24	55.28	13.7105	93.2022	6.79785
Ehhadh	Ehhadh-201	ENSMUSG00000022853|ENSMUST00000023559	54	105.034	504.25	492.38	26.46	30.34	17.5463	94.6081	5.39191
Rpl21	Rpl21-202	ENSMUSG00000041453|ENSMUST00000075453	15	104.974	98.93	257.92	127.95	544.12	0.530971	34.682	65.318
Hadhb	Hadhb-203	ENSMUSG00000059447|ENSMUST00000114786	221	104.919	641.93	343.82	75.3	3.33	12.5366	92.6126	7.3874
Acaa1b	Acaa1b-201	ENSMUSG00000010651|ENSMUST00000010795	93	104.492	2085.08	919.46	399.36	179.55	5.18999	83.8449	16.1551
Ran	Ran-202	ENSMUSG00000029430|ENSMUST00000111343	145	104.427	252.4	114.3	455.84	300.5	0.484835	32.6524	67.3476
Ugt2b35	Ugt2b35-201	ENSMUSG00000035811|ENSMUST00000031186	435	104.339	292.96	341.14	109.1	261.67	1.71022	63.1027	36.8973
Calm2	Calm2-201	ENSMUSG00000036438|ENSMUST00000040440	47	104.248	95.58	1085.45	0	47.4	24.9162	96.1414	3.85858
Oat	Oat-201	ENSMUSG00000030934|ENSMUST00000084500	401	104.242	732.2	553.99	1658.4	1170.82	0.454609	31.253	68.747
Cps1	Cps1-201	ENSMUSG00000025991|ENSMUST00000027144	292	104.049	1895.29	1175.54	6709.14	3343.6	0.305472	23.3993	76.6007
Selenbp2	Selenbp2-201	ENSMUSG00000068877|ENSMUST00000090848	153	103.952	1106.38	1455.23	41.76	64.32	24.1479	96.0235	3.97647
Psma3	Psma3-202	ENSMUSG00000060073|ENSMUST00000160027	39	103.901	320.84	569.56	354.01	161.23	1.72813	63.3448	36.6552
Cyp2a5	Cyp2a5-201	ENSMUSG00000005547|ENSMUST00000005685	121	103.884	1640.66	1945.8	281.29	314.48	6.01987	85.7547	14.2453
Dstn	Dstn-201	ENSMUSG00000015932|ENSMUST00000103172	128	103.779	768.35	570.5	320.26	208.08	2.53407	71.704	28.296
Pdcd6	Pdcd6-201	ENSMUSG00000021576|ENSMUST00000022060	162	103.667	281.54	168.16	34.31	8.4	10.5292	91.3263	8.67367
Psmd13	Psmd13-201	ENSMUSG00000025487|ENSMUST00000026560	119	103.629	98.71	260.22	75.71	92.63	2.13217	68.0733	31.9267
Pfdn5	Pfdn5-205	ENSMUSG00000001289|ENSMUST00000166658	64	103.298	437.2	204.41	6.67	3.47	63.2751	98.4442	1.55581
Alas1	Alas1-202	ENSMUSG00000032786|ENSMUST00000112524	397	103.038	925.26	904.94	168.05	220.95	4.70488	82.4712	17.5288
Dbt	Dbt-201	ENSMUSG00000000340|ENSMUST00000000349	210	103.013	290.69	200.15	4.8	20.19	19.6415	95.1554	4.84462
Hsp90aa1	Hsp90aa1-202	ENSMUSG00000021270|ENSMUST00000094361	605	102.983	494.29	383.57	275.13	177.79	1.93822	65.9658	34.0342
Fgl1	Fgl1-201	ENSMUSG00000031594|ENSMUST00000034003	279	102.977	863.08	949.52	738.47	600.26	1.35397	57.5186	42.4814
Fmo5	Fmo5-202	ENSMUSG00000028088|ENSMUST00000107049	177	102.745	1672.48	1801.98	735.55	272.22	3.44767	77.5163	22.4837
Cyb5r3	Cyb5r3-201	ENSMUSG00000018042|ENSMUST00000018186	14	102.665	1998.04	1342.16	95.52	104.24	16.7211	94.357	5.643
Psma3	Psma3-202	ENSMUSG00000060073|ENSMUST00000160027	188	102.607	734.74	260.48	182.47	234.05	2.38937	70.496	29.504
Mup18	Mup18-201	ENSMUSG00000078674|ENSMUST00000098040	161	102.593	10669.2	11893.1	1416.54	1811.59	6.9893	87.4833	12.5167
Glul	Glul-201	ENSMUSG00000026473|ENSMUST00000086199	195	102.503	1402.37	324.99	1367.95	384.87	0.985475	49.6342	50.3658
Atp5a1	Atp5a1-201	ENSMUSG00000025428|ENSMUST00000026495	160	102.415	5948.02	251.66	26.79	6.03	188.899	99.4734	0.526594
Adtrp	Adtrp-201	ENSMUSG00000058022|ENSMUST00000072012	74	102.291	9.11	33.2	266.49	477.45	0.0568729	5.38124	94.6188
Acaa1b	Acaa1b-201	ENSMUSG00000010651|ENSMUST00000010795	84	102.17	1851.36	1458.09	104.81	256.67	9.15528	90.1529	9.8471
Ugt3a2	Ugt3a2-201	ENSMUSG00000049152|ENSMUST00000072403	53	102.128	490.7	423.85	755.67	394.82	0.794922	44.2873	55.7127
Agt	Agt-201	ENSMUSG00000031980|ENSMUST00000063278	313	102.078	892.53	2675.01	419.27	868.24	2.77088	73.481	26.519
Selenop	Selenop-201	ENSMUSG00000064373|ENSMUST00000082424	59	102.033	1164.59	7911.68	290.51	3592.78	2.33726	70.0353	29.9647
Cyb5r3	Cyb5r3-201	ENSMUSG00000018042|ENSMUST00000018186	199	101.904	161.63	120.53	2693.07	803.62	0.0806935	7.46682	92.5332
Elob	Elob-201	ENSMUSG00000055839|ENSMUST00000069579	20	101.903	786.9	625.54	336.85	287.22	2.26327	69.3559	30.6441
Aadat	Aadat-201	ENSMUSG00000057228|ENSMUST00000079472	362	101.812	315	99.32	122.15	203.44	1.27252	55.996	44.004
Hacd2	Hacd2-201	ENSMUSG00000035376|ENSMUST00000061156	98	101.696	113.49	162.04	226.67	223.53	0.612017	37.9659	62.0341
Mup17	Mup17-201	ENSMUSG00000096688|ENSMUST00000107484	160	101.538	10734.3	12094.6	1413.14	1789.17	7.12886	87.6982	12.3018
Acadm	Acadm-201	ENSMUSG00000062908|ENSMUST00000072697	176	101.452	98.95	304.21	861.32	373.2	0.326572	24.6178	75.3822
Acsm1	Acsm1-201	ENSMUSG00000033533|ENSMUST00000047929	20	101.249	880.14	511.42	245.11	144.73	3.56957	78.1161	21.8839
Khk	Khk-204	ENSMUSG00000029162|ENSMUST00000201621	92	101.212	391.41	157.52	399.67	1412.09	0.302982	23.2529	76.7471
Anxa5	Anxa5-201	ENSMUSG00000027712|ENSMUST00000029266	110	101.193	327.63	264.57	27.66	74.17	5.81557	85.3277	14.6723
Ephx2	Ephx2-202	ENSMUSG00000022040|ENSMUST00000224698	408	101.052	1039.21	2585.46	716.76	319.67	3.49726	77.7643	22.2357
Ap2m1	Ap2m1-201	ENSMUSG00000022841|ENSMUST00000007216	409	100.942	12.66	59.86	94.43	509.93	0.119995	10.7139	89.2861
Vapa	Vapa-201	ENSMUSG00000024091|ENSMUST00000024897	136	100.803	390.21	307.94	125.17	174.32	2.33113	69.9802	30.0198
Cyp27a1	Cyp27a1-201	ENSMUSG00000026170|ENSMUST00000027356	124	100.716	847.1	601.3	713.18	808.73	0.951699	48.7626	51.2374
Gpx4	Gpx4-201	ENSMUSG00000075706|ENSMUST00000097227	128	100.633	778.68	635.58	13.18	1.23	98.1443	98.9914	1.00863
Tsku	Tsku-201	ENSMUSG00000049580|ENSMUST00000094161	201	100.576	357.6	242.5	137.37	73.03	2.85219	74.0407	25.9593
Aldh1a7	Aldh1a7-201	ENSMUSG00000024747|ENSMUST00000025656	339	100.445	791.49	102.17	6.97	28.08	25.4967	96.2259	3.77405
Herpud1	Herpud1-205	ENSMUSG00000031770|ENSMUST00000161576	333	100.39	1041.65	495.77	302.08	383.3	2.24316	69.1659	30.8341
Acss2	Acss2-201	ENSMUSG00000027605|ENSMUST00000029135	476	100.371	92.33	255.44	126.25	453.33	0.600038	37.5015	62.4985
Aco2	Aco2-201	ENSMUSG00000022477|ENSMUST00000023116	231	100.256	344.37	189.31	5.6	18.3	22.3297	95.7136	4.28638
Fgb	Fgb-201	ENSMUSG00000033831|ENSMUST00000048246	32	100.205	1387.54	929.45	14287.3	17845.4	0.0721069	6.72572	93.2743
Sec14l2	Sec14l2-201	ENSMUSG00000003585|ENSMUST00000003681	231	100.2	73.33	77.87	2144.8	883.72	0.0499254	4.75514	95.2449
Cyb5a	Cyb5a-204	ENSMUSG00000024646|ENSMUST00000160180	16	100.188	255.16	656.37	2679.25	12370.7	0.0605671	5.71082	94.2892
Cstb	Cstb-201	ENSMUSG00000005054|ENSMUST00000005185	60	100.126	198.24	297.65	46.24	148.79	2.54263	71.7724	28.2276
Hnrnpk	Hnrnpk-202	ENSMUSG00000021546|ENSMUST00000116403	248	100.105	553.87	120.14	346.78	224.38	1.18007	54.13	45.87
Plg	Plg-201	ENSMUSG00000059481|ENSMUST00000014578	108	99.8129	5015.5	2871.67	1411.27	587.9	3.94522	79.7785	20.2215
Rhoa	Rhoa-201	ENSMUSG00000007815|ENSMUST00000007959	44	99.6189	557.92	376.62	327.83	34.9	2.57641	72.039	27.961
Mup11	Mup11-202	ENSMUSG00000073834|ENSMUST00000098046	161	99.4934	10868.5	12024.8	1363.49	1757.83	7.3345	88.0017	11.9983
Pdhb	Pdhb-201	ENSMUSG00000021748|ENSMUST00000022268	193	99.4777	285.09	364.73	86.98	153.82	2.69859	72.9627	27.0373
Ndufs1	Ndufs1-201	ENSMUSG00000025968|ENSMUST00000027111	304	99.4629	81.91	134.76	149.99	166.7	0.684171	40.6236	59.3764
Cyp7a1	Cyp7a1-201	ENSMUSG00000028240|ENSMUST00000029905	157	99.4214	50.96	50.88	220.7	400.06	0.164057	14.0936	85.9064
Tat	Tat-201	ENSMUSG00000001670|ENSMUST00000001720	8	99.2781	645.96	2814.47	1445.31	2963.11	0.784959	43.9763	56.0237
Ugt2b35	Ugt2b35-201	ENSMUSG00000035811|ENSMUST00000031186	323	99.2449	653.42	142.39	250.95	21.59	2.91998	74.4896	25.5104
Aars	Aars-201	ENSMUSG00000031960|ENSMUST00000034441	107	99.2108	215.79	397.71	8.38	26.44	17.6192	94.6292	5.3708
Hsp90ab1	Hsp90ab1-201	ENSMUSG00000023944|ENSMUST00000024739	287	99.1664	1059.92	823	571.38	643.21	1.55025	60.7882	39.2118
Acox1	Acox1-201	ENSMUSG00000020777|ENSMUST00000066587	362	99.0966	813.94	6001.37	343.78	852.95	5.69494	85.0634	14.9366
Dhcr24	Dhcr24-201	ENSMUSG00000034926|ENSMUST00000047973	458	98.8848	343.82	702.78	323.83	286.57	1.71461	63.1623	36.8377
Tmsb4x	Tmsb4x-201	ENSMUSG00000049775|ENSMUST00000112172	14	98.8563	2072.24	2054.01	155.03	361.48	7.98871	88.8749	11.1251
Rpl37	Rpl37-201	ENSMUSG00000041841|ENSMUST00000045356	47	98.7675	133.18	188.4	601.25	509.61	0.289487	22.4498	77.5502
Cs	Cs-201	ENSMUSG00000005683|ENSMUST00000005826	139	98.6699	179.3	301.92	79.32	86.4	2.90381	74.384	25.616
Hamp2	Hamp2-203	ENSMUSG00000056978|ENSMUST00000217812	47	98.6376	144.1	41.49	205.02	150.25	0.522391	34.3139	65.6861
Fdps	Fdps-203	ENSMUSG00000059743|ENSMUST00000196709	247	98.611	387.95	232.14	983.26	863.42	0.335786	25.1377	74.8623
Scp2	Scp2-201	ENSMUSG00000028603|ENSMUST00000030340	312	98.479	1301.84	940.21	9374.94	8547.25	0.125099	11.1189	88.8811
Etnppl	Etnppl-203	ENSMUSG00000019232|ENSMUST00000166187	484	98.3588	554.24	197.01	180.63	74.65	2.94285	74.6376	25.3624
Sult1d1	Sult1d1-201	ENSMUSG00000029273|ENSMUST00000113314	17	98.2632	75.51	575.96	90.01	57.15	4.42695	81.5734	18.4266
Atp5b	Atp5b-201	ENSMUSG00000025393|ENSMUST00000026459	237	98.1669	531.69	378.03	2575.12	2490.68	0.179581	15.2241	84.7759
Pygl	Pygl-201	ENSMUSG00000021069|ENSMUST00000071250	79	98.0056	751.46	250.99	978.27	324.37	0.769553	43.4885	56.5115
Hsd3b3	Hsd3b3-204	ENSMUSG00000062410|ENSMUST00000107019	248	97.972	327.27	272.31	90.1	77.23	3.58322	78.1813	21.8187
Scp2	Scp2-201	ENSMUSG00000028603|ENSMUST00000030340	428	97.7791	10223.1	2416.91	5208.58	1267.74	1.95172	66.1215	33.8785
Adh1	Adh1-201	ENSMUSG00000074207|ENSMUST00000004232	366	97.7566	3945.29	3788.46	3770.62	4045.79	0.989425	49.7342	50.2658
Ostc	Ostc-201	ENSMUSG00000041084|ENSMUST00000043937	46	97.682	68.56	223.35	199.04	250.39	0.649512	39.376	60.624
Nme1	Nme1-203	ENSMUSG00000037601|ENSMUST00000135884	142	97.6131	363.35	475.18	8.87	24.36	25.2341	96.1882	3.81183
Aox3	Aox3-201	ENSMUSG00000064294|ENSMUST00000040999	293	97.5698	378.71	239.87	634.12	966.73	0.386407	27.8711	72.1289
Tmed9	Tmed9-203	ENSMUSG00000058569|ENSMUST00000224741	127	97.4238	87.88	109.48	159.74	183.38	0.575192	36.5157	63.4843
Acadl	Acadl-201	ENSMUSG00000026003|ENSMUST00000027153	381	97.4045	506.94	316.61	243.27	189.19	1.90434	65.5687	34.4313
Prdx6	Prdx6-202	ENSMUSG00000026701|ENSMUST00000071718	105	97.3978	1077.81	1152.17	951.64	543.69	1.4913	59.8603	40.1397
Nars	Nars-201	ENSMUSG00000024587|ENSMUST00000025483	250	97.3712	123.3	44.97	318.82	36.52	0.473546	32.1365	67.8635
Acaa2	Acaa2-201	ENSMUSG00000036880|ENSMUST00000041053	208	97.28	4425.94	2353.44	869.09	449.58	5.14107	83.7162	16.2838
Rida	Rida-201	ENSMUSG00000022323|ENSMUST00000022946	40	97.0528	1788.69	2678.19	617.11	2675.67	1.35657	57.5654	42.4346
Mdh2	Mdh2-201	ENSMUSG00000019179|ENSMUST00000019323	188	97.0369	565.48	600.97	117.04	149.3	4.37955	81.4111	18.5889
Slc1a2	Slc1a2-202	ENSMUSG00000005089|ENSMUST00000080210	156	96.9468	350.64	183.84	68.15	14.11	6.49745	86.6621	13.3379
Pdcd4	Pdcd4-202	ENSMUSG00000024975|ENSMUST00000074371	216	96.9413	0	39.61	306.74	447.1	0.0525443	4.99212	95.0079
Hmgcs2	Hmgcs2-201	ENSMUSG00000027875|ENSMUST00000090746	351	96.8909	10246.1	2084.54	67.49	52.91	102.414	99.033	0.966988
Dpyd	Dpyd-201	ENSMUSG00000033308|ENSMUST00000039177	341	96.7378	441.67	487.91	64.19	105.05	5.49267	84.598	15.402
Cldn1	Cldn1-201	ENSMUSG00000022512|ENSMUST00000023154	61	96.7162	177.79	41.1	331.75	117.11	0.487658	32.7802	67.2198
Hsd17b11	Hsd17b11-201	ENSMUSG00000029311|ENSMUST00000031251	36	96.6288	118.61	589.18	398.89	34.23	1.63417	62.0373	37.9627
Caprin1	Caprin1-201	ENSMUSG00000027184|ENSMUST00000028607	124	96.6275	293.04	184.77	30.05	7.54	12.7111	92.7066	7.29336
Mthfd1	Mthfd1-201	ENSMUSG00000021048|ENSMUST00000021443	485	96.5554	443.61	249.36	112.03	134.43	2.81169	73.7649	26.2351
Psma3	Psma3-202	ENSMUSG00000060073|ENSMUST00000160027	105	96.5429	486.43	734.66	31.85	96.52	9.51227	90.4873	9.51269
Hal	Hal-202	ENSMUSG00000020017|ENSMUST00000129421	224	96.512	144.26	561.18	391.94	447.81	0.84006	45.6539	54.3461
Otc	Otc-201	ENSMUSG00000031173|ENSMUST00000049910	108	96.4361	1719.13	1140.53	2543.62	1069.93	0.791371	44.1768	55.8232
Etfa	Etfa-201	ENSMUSG00000032314|ENSMUST00000034866	116	96.4148	1589.66	766.43	21.87	19.31	57.2144	98.2822	1.71779
Pzp	Pzp-201	ENSMUSG00000030359|ENSMUST00000112132	178	96.4106	10593.1	1837.93	30.23	4.43	358.655	99.722	0.278044
Aldob	Aldob-201	ENSMUSG00000028307|ENSMUST00000029987	267	96.3549	18784	2345.41	1863.85	429.93	9.21162	90.2072	9.79277
Psma2	Psma2-201	ENSMUSG00000015671|ENSMUST00000170836	222	96.3548	254.2	508.16	16.6	122.66	5.47436	84.5545	15.4455
Ostc	Ostc-201	ENSMUSG00000041084|ENSMUST00000043937	47	96.215	186.09	128.32	205.66	208.83	0.758547	43.1349	56.8651
Maob	Maob-201	ENSMUSG00000040147|ENSMUST00000040820	45	96.1037	56.1	17.37	407.66	230.2	0.115182	10.3285	89.6715
Apoa2	Apoa2-204	ENSMUSG00000005681|ENSMUST00000111321	46	96.0757	32478.5	27976.7	21229.1	12672.4	1.78326	64.0709	35.9291
Dnaja1	Dnaja1-201	ENSMUSG00000028410|ENSMUST00000030118	367	96.0249	379.08	236.03	998.55	284.42	0.479442	32.407	67.593
Mpst	Mpst-201	ENSMUSG00000071711|ENSMUST00000043865	159	95.9169	83.53	293.06	59.23	210.03	1.39861	58.3092	41.6908
Slc25a5	Slc25a5-201	ENSMUSG00000016319|ENSMUST00000016463	53	95.8571	971.84	2471.69	22.01	104.4	27.241	96.459	3.54096
Ugt2b35	Ugt2b35-201	ENSMUSG00000035811|ENSMUST00000031186	439	95.8064	455.11	426.72	78.52	57.08	6.50317	86.6723	13.3277
Cth	Cth-201	ENSMUSG00000028179|ENSMUST00000118539	367	95.7683	656.12	1235.13	130.69	197.19	5.76812	85.2248	14.7752
Tuba4a	Tuba4a-202	ENSMUSG00000026202|ENSMUST00000186213	211	95.5946	479.72	415.58	106.91	95.46	4.42407	81.5637	18.4363
Iigp1	Iigp1-201	ENSMUSG00000054072|ENSMUST00000032473	17	95.5758	918.21	77.53	83.47	10.7	10.5739	91.3598	8.64016
Stard10	Stard10-202	ENSMUSG00000030688|ENSMUST00000163799	330	95.5115	650.89	423.59	52.77	77.69	8.23609	89.1729	10.8271
Prodh	Prodh-201	ENSMUSG00000003526|ENSMUST00000003620	490	95.2718	148.26	104.71	133.06	184	0.797862	44.3784	55.6216
Ldha	Ldha-210	ENSMUSG00000063229|ENSMUST00000209984	286	95.1759	2806.63	2287.43	135.05	76.68	24.0592	96.0095	3.99055
Ppara	Ppara-202	ENSMUSG00000022383|ENSMUST00000109422	462	94.9193	101.92	239.81	46.96	136.34	1.86432	65.0877	34.9123
Apoa5	Apoa5-202	ENSMUSG00000032079|ENSMUST00000121598	198	94.9021	504.75	1095.55	1700.78	4348.67	0.264536	20.9196	79.0804
Ybx1	Ybx1-201	ENSMUSG00000028639|ENSMUST00000079644	258	94.8537	66.12	62.89	497.46	343.95	0.153326	13.2942	86.7058
Galm	Galm-201	ENSMUSG00000035473|ENSMUST00000039205	253	94.8531	242.83	218.77	32.35	43.55	6.08169	85.8791	14.1209
Pck1	Pck1-201	ENSMUSG00000027513|ENSMUST00000029017	527	94.8096	1773.57	1615.12	456.33	2900.73	1.00942	50.2344	49.7656
Serpina3m	Serpina3m-202	ENSMUSG00000079012|ENSMUST00000168797	66	94.7618	261.86	672.72	69	256.31	2.87289	74.1795	25.8205
Gne	Gne-201	ENSMUSG00000028479|ENSMUST00000030201	195	94.5719	148.5	40.31	139.94	11.07	1.25031	55.5618	44.4382
Cct4	Cct4-204	ENSMUSG00000007739|ENSMUST00000173867	207	94.3985	131.43	144.28	46.78	75.03	2.26344	69.3575	30.6425
Tdo2	Tdo2-201	ENSMUSG00000028011|ENSMUST00000029645	224	94.1722	1184.03	496.97	6133.28	2268.07	0.200087	16.6727	83.3273
Pcx	Pcx-201	ENSMUSG00000024892|ENSMUST00000068004	144	94.1019	344.22	248.27	126.36	289.27	1.42552	58.7718	41.2282
Sparc	Sparc-201	ENSMUSG00000018593|ENSMUST00000018737	52	94.0871	339.47	76.86	5.56	0	74.8795	98.6821	1.31788
Rpl37a	Rpl37a-201	ENSMUSG00000046330|ENSMUST00000059980	53	94.021	619.37	522.05	93.02	19	10.1894	91.063	8.93701
Tkt	Tkt-201	ENSMUSG00000021957|ENSMUST00000022529	425	94.0063	297.7	255.56	48.64	36.29	6.51431	86.6921	13.3079
Ftcd	Ftcd-201	ENSMUSG00000001155|ENSMUST00000001183	388	93.9198	384.06	160.71	561.74	335.39	0.607236	37.7814	62.2186
Nqo2	Nqo2-202	ENSMUSG00000046949|ENSMUST00000058978	130	93.9019	185.83	321.85	166.79	61.27	2.22608	69.0026	30.9974
Ugt2b36	Ugt2b36-201	ENSMUSG00000070704|ENSMUST00000094649	115	93.8807	2729.19	353.16	299.56	359.6	4.67618	82.3825	17.6175
C130074G19Rik	C130074G19Rik-201	ENSMUSG00000039349|ENSMUST00000048308	47	93.8084	25.21	23.07	202.97	217.49	0.114827	10.3	89.7
Ddx3x	Ddx3x-201	ENSMUSG00000000787|ENSMUST00000000804	478	93.7825	358.28	155.53	134.22	10.5	3.55037	78.0238	21.9762
Snrpd2	Snrpd2-201	ENSMUSG00000040824|ENSMUST00000049294	93	93.7428	42.95	367.01	31.99	125.68	2.60011	72.2231	27.7769
Cyp4f15	Cyp4f15-204	ENSMUSG00000073424|ENSMUST00000168171	278	93.287	149.44	77	181.27	150.3	0.682933	40.5799	59.4201
Cox7b	Cox7b-201	ENSMUSG00000031231|ENSMUST00000033582	61	93.1468	722.47	1651.9	33.36	110.96	16.4521	94.27	5.72996
Ehhadh	Ehhadh-201	ENSMUSG00000022853|ENSMUST00000023559	465	93.1219	176.42	229.13	133.99	349.79	0.838294	45.6017	54.3983
F9	F9-201	ENSMUSG00000031138|ENSMUST00000033477	410	93.0115	252.53	429.54	76.63	108.74	3.67951	78.6302	21.3698
Aadat	Aadat-201	ENSMUSG00000057228|ENSMUST00000079472	201	92.9458	101.36	670.09	23.27	33.84	13.5081	93.1073	6.89268
Aldh9a1	Aldh9a1-201	ENSMUSG00000026687|ENSMUST00000028004	417	92.916	754.69	116.47	160.93	2.45	5.33211	84.2075	15.7925
Dnaja3	Dnaja3-201	ENSMUSG00000004069|ENSMUST00000060067	428	92.903	165.84	68.24	162.33	41.11	1.15061	53.5016	46.4984
Acadl	Acadl-201	ENSMUSG00000026003|ENSMUST00000027153	48	92.8927	249.24	525.77	182.48	206.07	1.99462	66.6068	33.3932
4931406C07Rik	4931406C07Rik-203	ENSMUSG00000031938|ENSMUST00000180339	82	92.8801	615.91	463.98	81.87	36.76	9.10301	90.102	9.89804
Aldh1a1	Aldh1a1-201	ENSMUSG00000053279|ENSMUST00000087638	402	92.8583	1171.17	614.11	455.47	718.43	1.52081	60.3302	39.6698
Galm	Galm-201	ENSMUSG00000035473|ENSMUST00000039205	266	92.81	434.73	59.34	17.55	10.47	17.6328	94.6331	5.36689
Paip2	Paip2-201	ENSMUSG00000037058|ENSMUST00000041314	112	92.8067	121.09	291.79	43.01	53.84	4.26309	80.9997	19.0003
Uqcrc1	Uqcrc1-201	ENSMUSG00000025651|ENSMUST00000026743	81	92.6951	418.92	576.86	468.15	200.46	1.48933	59.8285	40.1715
Ugt3a2	Ugt3a2-201	ENSMUSG00000049152|ENSMUST00000072403	62	92.6676	666.87	451.33	600.6	332.99	1.19774	54.4988	45.5012
Atp5a1	Atp5a1-201	ENSMUSG00000025428|ENSMUST00000026495	500	92.6459	2717.86	809.57	1540.69	426.59	1.79305	64.1968	35.8032
Hsd3b3	Hsd3b3-204	ENSMUSG00000062410|ENSMUST00000107019	136	92.6273	456.74	127.14	218.4	20.3	2.44608	70.9815	29.0185
Abcg2	Abcg2-201	ENSMUSG00000029802|ENSMUST00000031822	136	92.6076	257.11	172.53	28.08	29.36	7.47981	88.2073	11.7927
Lrp1	Lrp1-201	ENSMUSG00000040249|ENSMUST00000049149	3990	92.5447	68.22	341.42	33.1	240.82	1.49547	59.9274	40.0726
Mut	Mut-201	ENSMUSG00000023921|ENSMUST00000169611	336	92.5427	180.66	172.79	67.74	43.04	3.19056	76.1368	23.8632
Hspa8	Hspa8-201	ENSMUSG00000015656|ENSMUST00000015800	27	92.324	1121.47	3407.91	24.49	128.53	29.5999	96.732	3.26798
Decr2	Decr2-201	ENSMUSG00000036775|ENSMUST00000040907	278	92.3051	448.33	60.3	615.21	247.37	0.589661	37.0935	62.9065
Ugp2	Ugp2-202	ENSMUSG00000001891|ENSMUST00000102875	199	92.2746	1181.95	401.27	524.66	74.19	2.64377	72.5559	27.4441
Tpi1	Tpi1-205	ENSMUSG00000023456|ENSMUST00000172132	179	92.2712	1305.51	235.16	361.09	124.66	3.17173	76.0292	23.9708
Fabp2	Fabp2-201	ENSMUSG00000023057|ENSMUST00000023820	23	92.234	61.88	26.75	235.08	356.71	0.149766	13.0258	86.9742
Mbl2	Mbl2-201	ENSMUSG00000024863|ENSMUST00000025797	53	92.2099	1037.42	447.56	45.47	52.03	15.2306	93.8388	6.16122
Serinc3	Serinc3-201	ENSMUSG00000017707|ENSMUST00000017851	187	92.1684	424.58	252.86	323.52	124.79	1.5111	60.1768	39.8232
F13b	F13b-201	ENSMUSG00000026368|ENSMUST00000027615	14	92.1243	422	398.42	51.79	89.84	5.7927	85.2783	14.7217
Sucla2	Sucla2-203	ENSMUSG00000022110|ENSMUST00000160507	245	92.1082	453.9	98.25	60.2	47.48	5.12769	83.6806	16.3194
Acadm	Acadm-201	ENSMUSG00000062908|ENSMUST00000072697	413	92.0981	461.71	183.69	154.07	113.28	2.41406	70.7094	29.2906
Alas1	Alas1-202	ENSMUSG00000032786|ENSMUST00000112524	398	92.0125	562.19	636.02	598.9	297.56	1.3366	57.2028	42.7972
Atp5g1	Atp5g1-201	ENSMUSG00000006057|ENSMUST00000090541	20	91.7784	70.57	183.88	579.45	1818.65	0.106105	9.59266	90.4073
Cltc	Cltc-202	ENSMUSG00000047126|ENSMUST00000103186	935	91.7682	273.63	187.63	13.96	6.84	22.176	95.6852	4.31482
Eif4g1	Eif4g1-201	ENSMUSG00000045983|ENSMUST00000044783	114	91.7252	226.35	145.17	36.18	41.36	4.79133	82.7328	17.2672
Ces1f	Ces1f-201	ENSMUSG00000031725|ENSMUST00000034178	18	91.6216	818.3	1046.62	491.79	197.13	2.70702	73.0242	26.9758
Slc25a5	Slc25a5-201	ENSMUSG00000016319|ENSMUST00000016463	158	91.6171	1389.19	888.27	317.58	336.84	3.48012	77.6792	22.3208
Gchfr	Gchfr-201	ENSMUSG00000046814|ENSMUST00000057454	62	91.5683	205.81	426.82	124.89	267.37	1.61278	61.7266	38.2734
Zfand6	Zfand6-208	ENSMUSG00000030629|ENSMUST00000209117	129	91.4526	221.86	162.25	61.66	94.88	2.45375	71.046	28.954
Selenok	Selenok-201	ENSMUSG00000042682|ENSMUST00000112268	90	91.4102	570.4	182.1	20.14	3.76	31.4854	96.9217	3.07831
Ugt1a1	Ugt1a1-201	ENSMUSG00000089960|ENSMUST00000073049	54	91.3603	1132.87	359.31	46.92	31.98	18.9123	94.978	5.02202
Plpp3	Plpp3-201	ENSMUSG00000028517|ENSMUST00000064139	69	91.2857	21.83	65.93	339.41	520.47	0.102061	9.2609	90.7391
Arpc3	Arpc3-202	ENSMUSG00000029465|ENSMUST00000102525	150	91.278	365.4	292.79	113.97	88.25	3.25482	76.4973	23.5027
Tsku	Tsku-201	ENSMUSG00000049580|ENSMUST00000094161	20	91.0798	173.42	68.71	401.94	87.38	0.49483	33.1027	66.8973
Vcp	Vcp-201	ENSMUSG00000028452|ENSMUST00000030164	689	91.0387	115.36	254.7	138.23	971.73	0.333399	25.0037	74.9963
Gstk1	Gstk1-201	ENSMUSG00000029864|ENSMUST00000031897	34	91.0219	552.66	349.79	271.07	61.4	2.71438	73.0776	26.9224
Cfh	Cfh-202	ENSMUSG00000026365|ENSMUST00000111976	19	90.8987	538.18	405.58	1253.68	524.45	0.53076	34.673	65.327
Adtrp	Adtrp-201	ENSMUSG00000058022|ENSMUST00000072012	47	90.8768	405.96	235.03	12.05	16.47	22.4751	95.7402	4.25983
Elovl5	Elovl5-201	ENSMUSG00000032349|ENSMUST00000034904	103	90.8066	559.19	921.48	234.77	641.78	1.6892	62.8142	37.1858
Rpl4	Rpl4-201	ENSMUSG00000032399|ENSMUST00000034966	15	90.7723	535.44	303.13	30.01	43.73	11.372	91.9172	8.08278
Rpl5	Rpl5-201	ENSMUSG00000058558|ENSMUST00000082223	42	90.6365	235.76	105.95	410.35	192.18	0.567125	36.1889	63.8111
Elovl3	Elovl3-201	ENSMUSG00000038754|ENSMUST00000043739	82	90.6045	306.81	542.46	1546.31	1256.65	0.30299	23.2535	76.7465
Sdc2	Sdc2-201	ENSMUSG00000022261|ENSMUST00000022871	18	90.566	755.38	1043.02	97.89	55.56	11.7198	92.1382	7.86177
Gnas	Gnas-202	ENSMUSG00000027523|ENSMUST00000087871	206	90.5349	380.84	267.92	825.01	559.65	0.468534	31.9049	68.0951
Rpl12	Rpl12-203	ENSMUSG00000038900|ENSMUST00000126610	51	90.5154	580.17	101.59	4.69	3.58	82.4377	98.8015	1.1985
Hnrnpc	Hnrnpc-201	ENSMUSG00000060373|ENSMUST00000111610	239	90.4748	193.78	120.33	28.24	72.84	3.10754	75.6545	24.3455
Psma1	Psma1-201	ENSMUSG00000030751|ENSMUST00000033008	238	90.4649	73.65	165.82	349	546.36	0.267457	21.1018	78.8982
Tat	Tat-201	ENSMUSG00000001670|ENSMUST00000001720	202	90.4534	601.99	1101.26	4233.88	1351.57	0.304944	23.3684	76.6316
Slc25a3	Slc25a3-201	ENSMUSG00000061904|ENSMUST00000076694	255	90.4456	401.88	245.39	299.1	181.43	1.34699	57.3923	42.6077
Etfa	Etfa-201	ENSMUSG00000032314|ENSMUST00000034866	279	90.3953	333.65	2145.37	9.8	63.16	33.9778	97.141	2.85896
Dlst	Dlst-201	ENSMUSG00000004789|ENSMUST00000053811	253	90.3871	192.06	312.73	77.28	112.8	2.65567	72.6452	27.3548
Krt8	Krt8-201	ENSMUSG00000049382|ENSMUST00000023952	122	90.3681	440.18	276.68	333.47	200.93	1.34143	57.2911	42.7089
Pcbd1	Pcbd1-201	ENSMUSG00000020098|ENSMUST00000020298	65	90.3098	239.65	99.8	1981.96	520.33	0.135656	11.9451	88.0549
Uqcrfs1	Uqcrfs1-201	ENSMUSG00000038462|ENSMUST00000042834	157	90.1853	340.74	1064.41	46.98	197.05	5.7581	85.2029	14.7971
Mup17	Mup17-201	ENSMUSG00000096688|ENSMUST00000107484	54	90.165	4065.76	7322.24	5418.4	6689.44	0.940548	48.4682	51.5318
Kynu	Kynu-201	ENSMUSG00000026866|ENSMUST00000028223	460	90.0554	306.29	174.72	219.4	141.2	1.33392	57.1536	42.8464
Cyp1a2	Cyp1a2-201	ENSMUSG00000032310|ENSMUST00000034860	493	90.0237	1654.31	2173.71	203.82	101.69	12.5299	92.609	7.39102
Ube2v1	Ube2v1-202	ENSMUSG00000078923|ENSMUST00000109207	61	89.9057	147.33	126.33	110.05	151.6	1.0459	51.1218	48.8782
Scd1	Scd1-201	ENSMUSG00000037071|ENSMUST00000041331	85	89.8531	727.33	148.07	18838.2	3766.96	0.0387257	3.72819	96.2718
Eci2	Eci2-211	ENSMUSG00000021417|ENSMUST00000171229	300	89.7743	254.1	121.91	208.98	29.94	1.57379	61.1468	38.8532
St13	St13-205	ENSMUSG00000022403|ENSMUST00000172107	290	89.7653	605.29	205.27	134.71	61.58	4.1294	80.5045	19.4955
Dpyd	Dpyd-201	ENSMUSG00000033308|ENSMUST00000039177	273	89.6868	348.2	483.42	75.61	112.02	4.43223	81.5914	18.4086
Fh1	Fh1-201	ENSMUSG00000026526|ENSMUST00000027810	62	89.6466	22.74	55.49	255.79	843.01	0.0711959	6.64639	93.3536
Atp5j	Atp5j-203	ENSMUSG00000022890|ENSMUST00000114193	26	89.6171	677.44	1786.12	194.96	771.7	2.54853	71.8193	28.1807
Sds	Sds-204	ENSMUSG00000029597|ENSMUST00000201684	154	89.6156	465.39	245.77	281.39	204.9	1.46242	59.3895	40.6105
Edf1	Edf1-201	ENSMUSG00000015092|ENSMUST00000015236	112	89.4911	119.73	72.06	444.44	470.64	0.209588	17.3272	82.6728
Ybx1	Ybx1-201	ENSMUSG00000028639|ENSMUST00000079644	76	89.4748	521.16	288.75	28.56	26.17	14.7983	93.6702	6.3298
Cyp2d9	Cyp2d9-201	ENSMUSG00000068086|ENSMUST00000089129	78	89.3735	852.93	930.07	322.69	1321.61	1.08435	52.0235	47.9765
Hadhb	Hadhb-203	ENSMUSG00000059447|ENSMUST00000114786	372	89.3139	94.92	67.29	534.19	506.7	0.155838	13.4827	86.5173
Rpl8	Rpl8-201	ENSMUSG00000003970|ENSMUST00000004072	81	89.1526	604.89	451.48	11.96	3.47	68.4621	98.5604	1.43963
Cfl1	Cfl1-202	ENSMUSG00000056201|ENSMUST00000209469	86	89.1467	232.72	185.88	1172.75	809.6	0.211164	17.4348	82.5652
Akr1c19	Akr1c19-202	ENSMUSG00000071551|ENSMUST00000118663	297	89.0059	14.45	7.83	469.38	385.49	0.0260624	2.54004	97.46
Akr1c6	Akr1c6-201	ENSMUSG00000021210|ENSMUST00000021630	223	88.9846	2968.24	6318.31	233.09	398.63	14.7004	93.6307	6.36926
Slc25a13	Slc25a13-201	ENSMUSG00000015112|ENSMUST00000015256	149	88.9767	9.18	22.79	432.8	425.7	0.0372394	3.59024	96.4098
Vdac2	Vdac2-201	ENSMUSG00000021771|ENSMUST00000022293	194	88.8672	236.46	436.06	51.5	12.48	10.5114	91.313	8.68703
Dpyd	Dpyd-201	ENSMUSG00000033308|ENSMUST00000039177	936	88.8573	122.9	304.25	90.85	550.05	0.666485	39.9934	60.0066
Mup16	Mup16-202	ENSMUSG00000078675|ENSMUST00000107483	160	88.8373	10828.5	11989.1	1364.18	1710.98	7.41998	88.1235	11.8765
Psmc6	Psmc6-201	ENSMUSG00000021832|ENSMUST00000022380	163	88.7889	230.41	202.13	53.68	31.98	5.0495	83.4697	16.5303
Selenbp2	Selenbp2-201	ENSMUSG00000068877|ENSMUST00000090848	129	88.7185	251.33	732.19	1274.6	572.34	0.532513	34.7477	65.2523
Ywhag	Ywhag-201	ENSMUSG00000051391|ENSMUST00000055808	86	88.6751	113.86	66.77	388.02	336.91	0.249169	19.9468	80.0532
Cltc	Cltc-202	ENSMUSG00000047126|ENSMUST00000103186	1026	88.592	74.15	143.95	84.4	226.35	0.70185	41.2404	58.7596
Mettl7a1	Mettl7a1-201	ENSMUSG00000054619|ENSMUST00000067752	70	88.4672	222.06	882.09	132.48	622.74	1.46202	59.383	40.617
Iigp1	Iigp1-201	ENSMUSG00000054072|ENSMUST00000032473	81	88.3891	636.34	532.13	127.01	163.7	4.01937	80.0772	19.9228
Pcx	Pcx-201	ENSMUSG00000024892|ENSMUST00000068004	111	88.3272	811.07	52.05	2.24	14.73	50.8615	98.0718	1.92821
Tcp1	Tcp1-209	ENSMUSG00000068039|ENSMUST00000151287	162	88.3223	141.23	249.26	0	6.69	58.3692	98.3156	1.68437
Cyp3a25	Cyp3a25-203	ENSMUSG00000029630|ENSMUST00000145062	25	88.2786	190.87	284.02	148.87	55.22	2.32687	69.9417	30.0583
Ran	Ran-202	ENSMUSG00000029430|ENSMUST00000111343	125	88.2654	287.62	259.82	175.23	143.91	1.71536	63.1725	36.8275
Acsm1	Acsm1-201	ENSMUSG00000033533|ENSMUST00000047929	176	88.2376	53.66	66.09	721.81	843.82	0.0764868	7.10522	92.8948
Atp11c	Atp11c-205	ENSMUSG00000062949|ENSMUST00000154051	675	88.2279	64.94	9.97	343.36	5.99	0.214427	17.6566	82.3434
Tdo2	Tdo2-201	ENSMUSG00000028011|ENSMUST00000029645	144	88.108	5192.76	1647.88	1939.76	1107.21	2.24506	69.184	30.816
Hspd1	Hspd1-201	ENSMUSG00000025980|ENSMUST00000027123	388	88.0446	1179.68	891.12	66.91	54.19	17.0999	94.4751	5.52489
Calm1	Calm1-202	ENSMUSG00000001175|ENSMUST00000110082	51	87.9279	354.72	790.98	193.05	384.73	1.98293	66.476	33.524
Bbox1	Bbox1-201	ENSMUSG00000041660|ENSMUST00000046233	133	87.8649	1.23	8.66	933.06	134.18	0.00926689	0.918181	99.0818
Crp	Crp-201	ENSMUSG00000037942|ENSMUST00000038495	65	87.7641	579.13	692.72	1912.62	471.95	0.533367	34.784	65.216
Errfi1	Errfi1-201	ENSMUSG00000028967|ENSMUST00000030811	130	87.6091	116.36	43.14	972.55	99.57	0.148771	12.9504	87.0496
Pgk1	Pgk1-201	ENSMUSG00000062070|ENSMUST00000081593	10	87.5241	735.49	645.18	646.42	292.87	1.46991	59.5127	40.4873
Rpl38	Rpl38-203	ENSMUSG00000057322|ENSMUST00000106599	54	87.5219	366.27	372.76	337.26	483.84	0.900049	47.3698	52.6302
Cfl1	Cfl1-202	ENSMUSG00000056201|ENSMUST00000209469	150	87.5058	1109.63	221.72	347.73	249.26	2.2301	69.0412	30.9588
Slc25a10	Slc25a10-201	ENSMUSG00000025792|ENSMUST00000026899	281	87.4635	6.84	30.15	293.56	384.13	0.0545825	5.17574	94.8243
Crot	Crot-201	ENSMUSG00000003623|ENSMUST00000003720	536	87.3904	750.42	748.74	346.16	521.01	1.7288	63.3538	36.6462
Acp1	Acp1-201	ENSMUSG00000044573|ENSMUST00000062740	129	87.3038	71.79	41.48	260.7	83.98	0.328624	24.7341	75.2659
Acaa1a	Acaa1a-201	ENSMUSG00000036138|ENSMUST00000039784	1	87.1953	479.05	151.1	10.16	8.66	33.483	97.1	2.89998
Tufm	Tufm-202	ENSMUSG00000073838|ENSMUST00000106392	233	87.0613	108.6	287.86	37.09	41.04	5.07436	83.5374	16.4626
Gsta3	Gsta3-201	ENSMUSG00000025934|ENSMUST00000027067	208	86.9592	734.89	392.84	6472.25	5735.32	0.0923796	8.45673	91.5433
Hadh	Hadh-201	ENSMUSG00000027984|ENSMUST00000029610	263	86.7069	660.48	689.25	99.82	128.84	5.90278	85.5131	14.4869
Prdx3	Prdx3-201	ENSMUSG00000024997|ENSMUST00000025961	227	86.6798	136.16	535.1	106.16	55.26	4.15847	80.6144	19.3856
Hsd3b3	Hsd3b3-204	ENSMUSG00000062410|ENSMUST00000107019	269	86.6323	65.08	303.82	126.3	342.32	0.787205	44.0467	55.9533
Ddx3x	Ddx3x-201	ENSMUSG00000000787|ENSMUST00000000804	475	86.588	369.35	92.63	24.48	0	18.8717	94.9677	5.03227
Scd1	Scd1-201	ENSMUSG00000037071|ENSMUST00000041331	43	86.5796	8754.82	9145.32	2220.53	565.61	6.42471	86.5315	13.4685
Lgmn	Lgmn-202	ENSMUSG00000021190|ENSMUST00000110020	23	86.5674	309.14	50.58	54.02	6.96	5.89898	85.5051	14.4949
Fgg	Fgg-201	ENSMUSG00000033860|ENSMUST00000048486	142	86.5414	10623.5	5199.81	11988.9	5033.22	0.929571	48.175	51.825
Tmem176b	Tmem176b-203	ENSMUSG00000029810|ENSMUST00000166247	82	86.4252	487.28	714.83	41.99	527.39	2.11126	67.8587	32.1413
Phb	Phb-204	ENSMUSG00000038845|ENSMUST00000125172	64	86.3964	47.68	30.22	429.09	316.98	0.104414	9.45423	90.5458
Glud1	Glud1-201	ENSMUSG00000021794|ENSMUST00000022322	437	86.2841	977.84	1495.03	948.08	607.45	1.58973	61.3859	38.6141
Aldh1a1	Aldh1a1-201	ENSMUSG00000053279|ENSMUST00000087638	339	86.2402	1400.98	2377.37	385.75	334.27	5.24756	83.9938	16.0062
Aldh1l1	Aldh1l1-203	ENSMUSG00000030088|ENSMUST00000130418	617	86.1861	411.47	1841.5	46.69	465.74	4.39664	81.47	18.53
C6	C6-204	ENSMUSG00000022181|ENSMUST00000162585	54	86.1328	397.18	171.47	865.91	309.97	0.483595	32.5962	67.4038
Rps23	Rps23-201	ENSMUSG00000049517|ENSMUST00000051955	49	86.0119	132.95	65.8	369.34	219.25	0.337671	25.2432	74.7568
Eif3h	Eif3h-201	ENSMUSG00000022312|ENSMUST00000022925	216	85.9723	30.33	324.99	0.66	54.44	6.44864	86.5747	13.4253
Hnrnpa2b1	Hnrnpa2b1-201	ENSMUSG00000004980|ENSMUST00000069949	170	85.9158	569.44	586.34	13.18	7.26	56.545	98.2622	1.73777
Hao1	Hao1-201	ENSMUSG00000027261|ENSMUST00000028704	32	85.8933	329.33	361.44	793.84	816.79	0.428882	30.0152	69.9848
Iqgap2	Iqgap2-201	ENSMUSG00000021676|ENSMUST00000068603	1395	85.844	83.39	238.61	14.53	77.73	3.49014	77.729	22.271
Skp1a	Skp1a-201	ENSMUSG00000036309|ENSMUST00000037324	84	85.8275	55.42	93.12	726.01	1755.29	0.0598638	5.64825	94.3517
Slc38a4	Slc38a4-201	ENSMUSG00000022464|ENSMUST00000023101	505	85.8119	1525.93	2396.33	87.58	8.94	40.6368	97.5983	2.40172
Fh1	Fh1-201	ENSMUSG00000026526|ENSMUST00000027810	111	85.7982	163.83	264.82	305.66	376.42	0.628445	38.5917	61.4083
Mup16	Mup16-202	ENSMUSG00000078675|ENSMUST00000107483	15	85.7693	10933.6	4195.21	7050.74	2350	1.60932	61.6758	38.3242
Ddb1	Ddb1-201	ENSMUSG00000024740|ENSMUST00000025649	418	85.7134	316.54	165.69	2.35	21.35	20.3473	95.3156	4.68444
Ces2e	Ces2e-201	ENSMUSG00000031886|ENSMUST00000034355	8	85.7132	263.49	10.52	541.63	29.45	0.47981	32.4238	67.5762
Eno1	Eno1-202	ENSMUSG00000063524|ENSMUST00000080926	357	85.6856	1404.37	2019.17	306.98	331.85	5.35908	84.2745	15.7255
Keg1	Keg1-201	ENSMUSG00000024694|ENSMUST00000025598	14	85.6562	494.02	593.82	166.24	140.77	3.54334	77.9897	22.0103
Dlst	Dlst-201	ENSMUSG00000004789|ENSMUST00000053811	69	85.5443	36.33	7.33	435.3	213.38	0.0673059	6.30615	93.6938
Tmbim6	Tmbim6-201	ENSMUSG00000023010|ENSMUST00000023749	86	85.5294	4773	4810.24	303.54	407.25	13.4825	93.0951	6.90488
Dpyd	Dpyd-201	ENSMUSG00000033308|ENSMUST00000039177	551	85.4864	543.72	400.27	8.9	16.72	36.8458	97.3577	2.6423
Gpam	Gpam-201	ENSMUSG00000024978|ENSMUST00000061856	677	85.3541	163.96	255.04	33.82	36.97	5.91892	85.5469	14.4531
Keg1	Keg1-201	ENSMUSG00000024694|ENSMUST00000025598	139	85.3089	303.41	30	1164.8	106.99	0.262158	20.7706	79.2294
Aspdh	Aspdh-201	ENSMUSG00000038704|ENSMUST00000035929	241	85.1763	116.69	107.1	133.21	107.23	0.930752	48.2067	51.7933
Hspe1	Hspe1-201	ENSMUSG00000073676|ENSMUST00000075242	19	85.1724	1014.04	237.83	609.27	56.31	1.88087	65.2883	34.7117
Cct7	Cct7-201	ENSMUSG00000030007|ENSMUST00000032078	196	85.1537	66.35	88.18	120.32	176.13	0.521268	34.2654	65.7346
Pfdn5	Pfdn5-205	ENSMUSG00000001289|ENSMUST00000166658	48	85.1374	51.02	164.38	66.41	260.31	0.65928	39.7329	60.2671
Mtch2	Mtch2-205	ENSMUSG00000027282|ENSMUST00000136872	126	85.1237	293.89	435.13	62.42	1.32	11.4374	91.9597	8.04026
Gulo	Gulo-201	ENSMUSG00000034450|ENSMUST00000059970	233	85.094	842.1	771.88	245.04	230.36	3.39499	77.2468	22.7532
Lipa	Lipa-201	ENSMUSG00000024781|ENSMUST00000049572	37	85.0758	610.74	424.13	18.25	10.89	35.5137	97.2613	2.7387
Gcdh	Gcdh-201	ENSMUSG00000003809|ENSMUST00000003907	402	85.0347	918.61	453.31	79.76	164.69	5.61227	84.8766	15.1234
Ugt2b5	Ugt2b5-201	ENSMUSG00000054630|ENSMUST00000067790	155	84.9462	158.58	235.21	570.64	1530.28	0.187437	15.785	84.215
Rpl7	Rpl7-201	ENSMUSG00000043716|ENSMUST00000058437	15	84.9089	366.35	680.23	224.23	340.19	1.85426	64.9646	35.0354
Hsd17b4	Hsd17b4-201	ENSMUSG00000024507|ENSMUST00000025385	144	84.8783	163.53	493.96	326.39	725.49	0.625062	38.4639	61.5361
Csde1	Csde1-201	ENSMUSG00000068823|ENSMUST00000029446	775	84.7857	117.4	99.1	120.7	72.88	1.1184	52.7946	47.2054
Acy3	Acy3-201	ENSMUSG00000024866|ENSMUST00000054030	266	84.7112	21.26	43.3	456.54	85.54	0.119097	10.6422	89.3578
Edf1	Edf1-201	ENSMUSG00000015092|ENSMUST00000015236	138	84.6707	254.85	561.57	141.39	84.31	3.61728	78.3422	21.6578
Pygl	Pygl-201	ENSMUSG00000021069|ENSMUST00000071250	849	84.6706	470.15	227.11	834	421.58	0.555329	35.7049	64.2951
Hprt	Hprt-201	ENSMUSG00000025630|ENSMUST00000026723	107	84.5852	172.12	169.65	74.95	52.36	2.68455	72.8596	27.1404
Rps25	Rps25-205	ENSMUSG00000009927|ENSMUST00000216867	90	84.5695	471.36	1273.73	320.73	217.91	3.23981	76.414	23.586
Dlst	Dlst-201	ENSMUSG00000004789|ENSMUST00000053811	122	84.4888	149.81	230.04	145.77	149.7	1.28558	56.2474	43.7526
Acp1	Acp1-201	ENSMUSG00000044573|ENSMUST00000062740	23	84.4747	35.55	70.3	107.66	228.6	0.314786	23.942	76.058
Ftcd	Ftcd-201	ENSMUSG00000001155|ENSMUST00000001183	213	84.4599	431.52	466.91	102.35	72.16	5.1483	83.7353	16.2647
Prpf19	Prpf19-201	ENSMUSG00000024735|ENSMUST00000025642	222	84.4395	18.36	31.98	182.56	209.81	0.128297	11.3709	88.6291
Ndufab1	Ndufab1-203	ENSMUSG00000030869|ENSMUST00000123296	40	84.2512	299.62	133.88	372.49	232.27	0.716813	41.7525	58.2475
Saa4	Saa4-201	ENSMUSG00000040017|ENSMUST00000006952	15	84.2106	374.53	485.42	163.73	202.75	2.34651	70.1181	29.8819
Hagh	Hagh-202	ENSMUSG00000024158|ENSMUST00000118788	286	84.1605	266.96	520.09	252.09	597.06	0.926868	48.1023	51.8977
Ogdh	Ogdh-201	ENSMUSG00000020456|ENSMUST00000003461	575	84.0414	171.55	321.11	27.39	52.22	6.18842	86.0887	13.9113
BC031181	BC031181-201	ENSMUSG00000036299|ENSMUST00000040284	14	84.0024	149	96.45	235.34	127.82	0.675873	40.3296	59.6704
Slc25a13	Slc25a13-201	ENSMUSG00000015112|ENSMUST00000015256	19	83.9506	655.11	81.78	0	4.22	174.618	99.4306	0.569416
Rdh16f2	Rdh16f2-201	ENSMUSG00000074639|ENSMUST00000092058	183	83.8993	259.05	32.11	311	47.53	0.812094	44.8152	55.1848
Igfals	Igfals-201	ENSMUSG00000046070|ENSMUST00000050714	324	83.8326	359.03	204.85	7.17	2.35	59.2311	98.3397	1.66027
Hnrnpa3	Hnrnpa3-203	ENSMUSG00000059005|ENSMUST00000111962	26	83.7451	256.3	37.61	133.64	18.43	1.93273	65.9021	34.0979
Baat	Baat-201	ENSMUSG00000039653|ENSMUST00000043056	304	83.619	624.11	343.73	160.75	77.77	4.05769	80.2281	19.7719
Tmem33	Tmem33-201	ENSMUSG00000037720|ENSMUST00000037918	155	83.5877	41.32	319.05	7.23	125.07	2.72389	73.1463	26.8537
Gsta4	Gsta4-201	ENSMUSG00000032348|ENSMUST00000034903	137	83.5873	231.33	409.22	42.19	54.74	6.60838	86.8566	13.1434
Mdh2	Mdh2-201	ENSMUSG00000019179|ENSMUST00000019323	330	83.5689	437.81	357.06	195.4	281.56	1.66653	62.4981	37.5019
C8a	C8a-203	ENSMUSG00000035031|ENSMUST00000106808	5	83.5544	1701.27	267.15	168.82	429.2	3.29156	76.6985	23.3015
Ephx2	Ephx2-202	ENSMUSG00000022040|ENSMUST00000224698	347	83.4491	1094.99	1784.97	346.95	507.46	3.3707	77.1204	22.8796
Etfa	Etfa-201	ENSMUSG00000032314|ENSMUST00000034866	157	83.386	1300.96	704.15	52.6	110.09	12.3247	92.4952	7.50484
Echdc2	Echdc2-201	ENSMUSG00000028601|ENSMUST00000052999	24	83.238	40.95	23.57	246.07	115.56	0.178414	15.1402	84.8598
Ndufb3	Ndufb3-201	ENSMUSG00000026032|ENSMUST00000027193	55	83.209	319.22	819.99	133.55	337.65	2.41768	70.7404	29.2596
Oaz1	Oaz1-201	ENSMUSG00000035242|ENSMUST00000060987	20	83.186	159.69	236.17	85.72	128.87	1.84473	64.8472	35.1528
Hspd1	Hspd1-201	ENSMUSG00000025980|ENSMUST00000027123	306	83.1757	814.45	853.83	114.44	115.19	7.26508	87.9009	12.0991
Rdh7	Rdh7-201	ENSMUSG00000040134|ENSMUST00000047199	131	83.111	125.23	670.2	2747.2	2044.64	0.165997	14.2365	85.7635
Mbl2	Mbl2-201	ENSMUSG00000024863|ENSMUST00000025797	51	82.9086	354.41	176.99	566.15	372.91	0.565885	36.1384	63.8616
Serpina1d	Serpina1d-201	ENSMUSG00000071177|ENSMUST00000078869	214	82.8999	363.99	2114.29	1062.57	6971.77	0.308461	23.5743	76.4257
Psma1	Psma1-201	ENSMUSG00000030751|ENSMUST00000033008	71	82.8929	395.45	243.61	307.28	54.52	1.76633	63.8511	36.1489
Fga	Fga-201	ENSMUSG00000028001|ENSMUST00000029630	26	82.5359	11483.1	9168.81	4085.41	3961.8	2.56634	71.9601	28.0399
Scd1	Scd1-201	ENSMUSG00000037071|ENSMUST00000041331	28	82.4782	1540.21	16736.5	341.81	2269.81	6.99821	87.4972	12.5028
Aco1	Aco1-201	ENSMUSG00000028405|ENSMUST00000102973	791	82.3711	17.85	13.88	293.71	560.7	0.0371367	3.5807	96.4193
Mug1	Mug1-201	ENSMUSG00000059908|ENSMUST00000032228	722	82.3159	350.91	803.66	1756.68	6773.84	0.135346	11.9211	88.0789
Arf4	Arf4-201	ENSMUSG00000021877|ENSMUST00000022429	165	82.3015	164.45	715.69	73.58	199.26	3.22585	76.3361	23.6639
Dhcr24	Dhcr24-201	ENSMUSG00000034926|ENSMUST00000047973	479	82.2506	290.9	887.32	46.31	145.8	6.13305	85.9807	14.0193
Ppp1cb	Ppp1cb-201	ENSMUSG00000014956|ENSMUST00000015100	180	82.1906	79.83	302.89	1.23	20.82	17.3569	94.5525	5.44754
Etfdh	Etfdh-201	ENSMUSG00000027809|ENSMUST00000029386	595	82.1903	26.12	95.66	123.18	327.38	0.270286	21.2776	78.7224
Morf4l2	Morf4l2-201	ENSMUSG00000031422|ENSMUST00000033797	86	82.1806	43.92	32.36	200.64	152.35	0.216097	17.7697	82.2303
Plg	Plg-201	ENSMUSG00000059481|ENSMUST00000014578	95	82.1074	2613.41	3907.25	933.09	1369.43	2.83197	73.9037	26.0963
Tuba4a	Tuba4a-202	ENSMUSG00000026202|ENSMUST00000186213	116	81.9265	380.59	307.64	143.11	135.53	2.46996	71.1812	28.8188
Sbds	Sbds-201	ENSMUSG00000025337|ENSMUST00000026387	91	81.9088	179.53	53.65	33.04	139.27	1.35326	57.5057	42.4943
Sec11a	Sec11a-201	ENSMUSG00000025724|ENSMUST00000026818	80	81.8633	399.13	118.35	3.22	4.7	65.3384	98.4926	1.50742
Etfdh	Etfdh-201	ENSMUSG00000027809|ENSMUST00000029386	423	81.8631	4.16	1.98	358.02	220.58	0.0106118	1.05004	98.95
H2-K1	H2-K1-205	ENSMUSG00000061232|ENSMUST00000172912	61	81.8527	1628.52	427.52	2782.86	299.7	0.666991	40.0117	59.9883
Rpl37a	Rpl37a-201	ENSMUSG00000046330|ENSMUST00000059980	88	81.8451	41.97	858.94	12.21	297.27	2.91104	74.4314	25.5686
Abcd3	Abcd3-201	ENSMUSG00000028127|ENSMUST00000029770	495	81.8179	598.55	906.53	84.49	139.27	6.72631	87.0572	12.9428
Hadhb	Hadhb-203	ENSMUSG00000059447|ENSMUST00000114786	93	81.8149	368.05	391.9	244.68	104.94	2.17365	68.4905	31.5095
Rpl6	Rpl6-201	ENSMUSG00000029614|ENSMUST00000031617	106	81.8099	207.19	410.87	161.74	229.07	1.58148	61.2626	38.7374
Anxa5	Anxa5-201	ENSMUSG00000027712|ENSMUST00000029266	157	81.8019	403.35	123.9	6.84	14.58	24.6148	96.096	3.90399
Atp5o	Atp5o-201	ENSMUSG00000022956|ENSMUST00000023677	80	81.6554	227.6	459.46	423.16	872.57	0.530249	34.6512	65.3488
Cyp8b1	Cyp8b1-201	ENSMUSG00000050445|ENSMUST00000062474	51	81.6	60.55	84.64	838.58	1253.69	0.0693935	6.48905	93.5109
Sec61b	Sec61b-201	ENSMUSG00000053317|ENSMUST00000065678	64	81.5022	17.2	27.34	524.88	344.82	0.0512131	4.87181	95.1282
Hadhb	Hadhb-203	ENSMUSG00000059447|ENSMUST00000114786	318	81.4993	77.88	14.2	599.1	426.08	0.0898184	8.24159	91.7584
Ybx1	Ybx1-201	ENSMUSG00000028639|ENSMUST00000079644	104	81.4927	355.34	119.71	263.87	70.67	1.42001	58.6778	41.3222
Ywhab	Ywhab-201	ENSMUSG00000018326|ENSMUST00000018470	75	81.4372	194.97	417.49	47.78	117.9	3.69664	78.7082	21.2918
Erg28	Erg28-201	ENSMUSG00000021252|ENSMUST00000021676	21	81.4316	125.82	69.69	146.3	84.71	0.846327	45.8384	54.1616
Ifitm3	Ifitm3-201	ENSMUSG00000025492|ENSMUST00000026565	82	81.3836	2364.43	2191.67	220.11	454.56	6.75308	87.1019	12.8981
Apoc3	Apoc3-203	ENSMUSG00000032081|ENSMUST00000121916	58	81.3497	3335.69	1357.15	17097.5	11670.9	0.163125	14.0247	85.9753
Adk	Adk-201	ENSMUSG00000039197|ENSMUST00000045376	239	81.3445	1580.59	934.36	1161.66	489.53	1.52311	60.3664	39.6336
Csad	Csad-201	ENSMUSG00000023044|ENSMUST00000023805	369	81.3423	927.24	408.53	42.34	0	31.5487	96.9277	3.07232
C6	C6-204	ENSMUSG00000022181|ENSMUST00000162585	53	81.2413	391.14	422.02	343.65	615.76	0.847563	45.8746	54.1254
Tob1	Tob1-201	ENSMUSG00000037573|ENSMUST00000041589	18	80.9889	35.06	50.84	147.02	222.27	0.232609	18.8712	81.1288
H3f3b	H3f3b-202	ENSMUSG00000016559|ENSMUST00000106454	124	80.9492	1320.12	110.07	353.4	51.93	3.52846	77.9174	22.0826
Maob	Maob-201	ENSMUSG00000040147|ENSMUST00000040820	153	80.9345	171.91	268.8	24.23	128.01	2.89484	74.325	25.675
Aass	Aass-201	ENSMUSG00000029695|ENSMUST00000031707	208	80.9021	193.11	118.28	391.19	120.17	0.608945	37.8475	62.1525
Mup3	Mup3-202	ENSMUSG00000066154|ENSMUST00000107472	22	80.8906	4992.88	5169.47	28559.3	28279.8	0.178792	15.1674	84.8326
Ufc1	Ufc1-201	ENSMUSG00000062963|ENSMUST00000080001	104	80.8338	104.11	201.83	38.87	23.2	4.92895	83.1336	16.8664
Vdac3	Vdac3-202	ENSMUSG00000008892|ENSMUST00000179233	210	80.7774	70.31	73.29	368.06	187.64	0.258413	20.5348	79.4652
Got1	Got1-201	ENSMUSG00000025190|ENSMUST00000026196	23	80.7702	592.25	80.55	34.56	33.55	9.87814	90.8073	9.19275
C6	C6-204	ENSMUSG00000022181|ENSMUST00000162585	732	80.7092	141.64	637.96	303.07	699.15	0.777873	43.753	56.247
Rps14	Rps14-203	ENSMUSG00000024608|ENSMUST00000122279	127	80.7001	933.84	68.27	48.96	152.25	4.98042	83.2788	16.7212
Pgm2	Pgm2-202	ENSMUSG00000025791|ENSMUST00000102783	403	80.6781	40.62	36.49	438.63	226.68	0.115901	10.3863	89.6137
Hacd2	Hacd2-201	ENSMUSG00000035376|ENSMUST00000061156	145	80.6011	44.33	180	42.82	312.07	0.632111	38.7297	61.2703
Tpt1	Tpt1-201	ENSMUSG00000060126|ENSMUST00000110894	80	80.5718	436.35	169.68	1332.8	607.88	0.312277	23.7966	76.2034
Ssr2	Ssr2-201	ENSMUSG00000041355|ENSMUST00000035785	44	80.5708	282.71	30.27	73.34	158.8	1.34824	57.4149	42.5851
Hprt	Hprt-201	ENSMUSG00000025630|ENSMUST00000026723	135	80.5701	79.54	81.12	166.46	132.49	0.537414	34.9557	65.0443
Cfhr1	Cfhr1-201	ENSMUSG00000057037|ENSMUST00000023965	94	80.5423	642.12	417.96	30.38	9.23	26.7629	96.3981	3.60192
Acsl1	Acsl1-203	ENSMUSG00000018796|ENSMUST00000110372	42	80.4403	152.6	607.74	871.8	1633.14	0.303536	23.2856	76.7144
Cd59a	Cd59a-201	ENSMUSG00000032679|ENSMUST00000040423	45	80.4394	230.91	41.54	78.09	146.51	1.21305	54.8134	45.1866
Edf1	Edf1-201	ENSMUSG00000015092|ENSMUST00000015236	114	80.3101	70.53	103.63	370.47	458.42	0.210112	17.363	82.637
Fabp2	Fabp2-201	ENSMUSG00000023057|ENSMUST00000023820	40	80.2959	91.11	24.59	321.23	168.88	0.236069	19.0984	80.9016
Rpl37	Rpl37-201	ENSMUSG00000041841|ENSMUST00000045356	62	80.2796	400.66	288.13	218.94	125.31	2.00084	66.676	33.324
Ubb	Ubb-201	ENSMUSG00000019505|ENSMUST00000019649	111	80.274	359.35	370.09	1932.79	1685.05	0.201623	16.7792	83.2208
Ubb	Ubb-201	ENSMUSG00000019505|ENSMUST00000019649	111	80.274	359.35	370.09	1932.79	1685.05	0.201623	16.7792	83.2208
Ubb	Ubb-201	ENSMUSG00000019505|ENSMUST00000019649	35	80.274	359.35	370.09	1932.79	1685.05	0.201623	16.7792	83.2208
Ubb	Ubb-201	ENSMUSG00000019505|ENSMUST00000019649	35	80.274	359.35	370.09	1932.79	1685.05	0.201623	16.7792	83.2208
Ubb	Ubb-201	ENSMUSG00000019505|ENSMUST00000019649	187	80.2517	359.35	368.87	1932.79	1685.05	0.201286	16.7559	83.2441
Sdha	Sdha-201	ENSMUSG00000021577|ENSMUST00000022062	359	80.1679	63.2	119.2	1103.56	529.2	0.111713	10.0487	89.9513
Psmd8	Psmd8-207	ENSMUSG00000030591|ENSMUST00000209034	211	80.148	32.6	23.88	74.23	358.07	0.13065	11.5553	88.4447
Hnrnpa3	Hnrnpa3-203	ENSMUSG00000059005|ENSMUST00000111962	19	80.1132	35.91	50.48	283.94	101.66	0.22404	18.3034	81.6966
Cs	Cs-201	ENSMUSG00000005683|ENSMUST00000005826	325	80.1013	196.26	154.39	106.38	56.64	2.15096	68.2637	31.7363
Bbox1	Bbox1-201	ENSMUSG00000041660|ENSMUST00000046233	185	80.0339	423.82	169.7	42.74	28.88	8.28707	89.2323	10.7677
Cyp2c50	Cyp2c50-202	ENSMUSG00000054827|ENSMUST00000080171	24	79.9684	369.49	202.27	342.88	212.59	1.02933	50.7226	49.2774
Fdps	Fdps-203	ENSMUSG00000059743|ENSMUST00000196709	250	79.8137	129.55	268.56	256.66	1337.02	0.249805	19.9875	80.0125
Adh1	Adh1-201	ENSMUSG00000074207|ENSMUST00000004232	26	79.8093	1905.73	1833.42	3709.05	5362.19	0.412198	29.1884	70.8116
Bckdha	Bckdha-201	ENSMUSG00000060376|ENSMUST00000071329	426	79.7758	303.15	330.9	89.28	269.8	1.76576	63.8436	36.1564
Hist2h2aa1	Hist2h2aa1-201	ENSMUSG00000064220|ENSMUST00000078756	118	79.6962	111.14	110.82	320.78	235.64	0.398907	28.5156	71.4844
Psmc4	Psmc4-201	ENSMUSG00000030603|ENSMUST00000032824	374	79.5913	325.27	76.87	17.76	1.12	21.2998	95.5157	4.48435
Kyat3	Kyat3-202	ENSMUSG00000040213|ENSMUST00000106218	124	79.5419	85.14	131.63	177.27	279.21	0.474873	32.1975	67.8025
Steap4	Steap4-201	ENSMUSG00000012428|ENSMUST00000115421	28	79.5369	54.74	88.24	314.6	9.7	0.440888	30.5984	69.4016
Pcx	Pcx-201	ENSMUSG00000024892|ENSMUST00000068004	75	79.5285	128.91	99.45	430.72	204.39	0.35956	26.4468	73.5532
Idh1	Idh1-201	ENSMUSG00000025950|ENSMUST00000097709	160	79.4125	45.81	239.31	403.17	2926.26	0.0856363	7.88812	92.1119
Cyp2c50	Cyp2c50-202	ENSMUSG00000054827|ENSMUST00000080171	49	79.3055	645.79	284.98	134.38	45.21	5.18275	83.826	16.174
Hnrnpc	Hnrnpc-201	ENSMUSG00000060373|ENSMUST00000111610	163	79.2857	115.5	214.44	46	34.18	4.11499	80.4496	19.5504
Pdia6	Pdia6-201	ENSMUSG00000020571|ENSMUST00000057288	285	79.2605	601.92	761.98	14.33	54.8	19.7295	95.176	4.82404
Cyp2a5	Cyp2a5-201	ENSMUSG00000005547|ENSMUST00000005685	75	79.1806	218.5	492.79	2160.47	601.13	0.257564	20.4812	79.5188
Khk	Khk-204	ENSMUSG00000029162|ENSMUST00000201621	160	79.1505	645.41	996.31	87.08	69.83	10.4628	91.2761	8.72386
Hdlbp	Hdlbp-202	ENSMUSG00000034088|ENSMUST00000170883	624	79.1333	170.22	127.36	206.69	170.62	0.788688	44.0931	55.9069
Acat1	Acat1-201	ENSMUSG00000032047|ENSMUST00000034547	169	79.1068	415.1	404.71	509.26	606.92	0.734478	42.3458	57.6542
Ran	Ran-202	ENSMUSG00000029430|ENSMUST00000111343	22	79.1041	94.64	675.7	34.41	44.91	9.7118	90.6645	9.3355
Ghitm	Ghitm-202	ENSMUSG00000041028|ENSMUST00000165649	183	79.0979	90.39	403.02	174.93	506.2	0.724399	42.0088	57.9912
Cltc	Cltc-202	ENSMUSG00000047126|ENSMUST00000103186	578	79.0744	7.85	13.37	318.73	140.26	0.0462319	4.4189	95.5811
Sult1d1	Sult1d1-201	ENSMUSG00000029273|ENSMUST00000113314	259	79.0286	29.72	172.07	225.14	218.24	0.455118	31.277	68.723
Skp1a	Skp1a-201	ENSMUSG00000036309|ENSMUST00000037324	42	78.9795	1219.15	497.18	323.91	218.64	3.16345	75.9815	24.0185
Gys2	Gys2-201	ENSMUSG00000030244|ENSMUST00000032371	470	78.9779	170.9	494.47	7.43	9.17	40.0825	97.5659	2.43412
Anxa5	Anxa5-201	ENSMUSG00000027712|ENSMUST00000029266	300	78.9218	188.48	305.31	40.81	21.5	7.92473	88.7952	11.2048
Acsm1	Acsm1-201	ENSMUSG00000033533|ENSMUST00000047929	19	78.8055	630.21	434.96	159.48	53.98	4.99002	83.3056	16.6944
Anxa7	Anxa7-202	ENSMUSG00000021814|ENSMUST00000100844	302	78.7318	65.25	78.25	176.49	100.37	0.518313	34.1374	65.8626
Pccb	Pccb-201	ENSMUSG00000032527|ENSMUST00000035116	386	78.596	88.16	233.83	48.6	96.25	2.22292	68.9722	31.0278
Sult2a8	Sult2a8-203	ENSMUSG00000030378|ENSMUST00000168252	51	78.5878	895.69	2355.29	182	407.54	5.51443	84.6495	15.3505
Actr2	Actr2-201	ENSMUSG00000020152|ENSMUST00000000137	99	78.569	344.99	254.37	11.13	19.13	19.807	95.1939	4.80607
Cyp3a13	Cyp3a13-201	ENSMUSG00000029727|ENSMUST00000031741	31	78.5667	78.93	674.18	24.52	128.95	4.90721	83.0715	16.9285
Abcd3	Abcd3-201	ENSMUSG00000028127|ENSMUST00000029770	478	78.5408	873.63	416.55	295.31	127.63	3.0505	75.3117	24.6883
Serpina10	Serpina10-201	ENSMUSG00000061947|ENSMUST00000044231	36	78.5348	133.67	390.21	60.55	78.92	3.75622	78.9749	21.0251
Zfp36l1	Zfp36l1-201	ENSMUSG00000021127|ENSMUST00000021552	82	78.4192	124.75	82.04	111.79	283.82	0.522712	34.3277	65.6723
Fdps	Fdps-203	ENSMUSG00000059743|ENSMUST00000196709	218	78.4088	1002.6	615.13	47.35	34.85	19.6804	95.1645	4.83549
Tufm	Tufm-202	ENSMUSG00000073838|ENSMUST00000106392	26	78.3786	10.8	210.77	139.44	101.59	0.919263	47.8967	52.1033
Saa1	Saa1-201	ENSMUSG00000074115|ENSMUST00000128088	63	78.3746	42.86	150.2	115.77	185.71	0.640374	39.0383	60.9617
Ugt2b34	Ugt2b34-201	ENSMUSG00000029260|ENSMUST00000031181	99	78.3707	1179.92	209.5	679.54	83.42	1.82109	64.5527	35.4473
Tmem14c	Tmem14c-201	ENSMUSG00000021361|ENSMUST00000021790	68	78.362	272.16	556.69	47.78	83.35	6.32083	86.3403	13.6597
Anxa6	Anxa6-202	ENSMUSG00000018340|ENSMUST00000108883	508	78.3445	215.61	124.71	79.19	210.97	1.17287	53.9779	46.0221
Pdcd4	Pdcd4-202	ENSMUSG00000024975|ENSMUST00000074371	437	78.2728	324.52	146.44	39.06	34.53	6.39978	86.4861	13.5139
F10	F10-201	ENSMUSG00000031444|ENSMUST00000033821	72	78.2121	268.45	255.83	974.77	661.2	0.32047	24.2694	75.7306
Gpc4	Gpc4-201	ENSMUSG00000031119|ENSMUST00000033450	350	78.1738	107.89	345.15	16.23	48.75	6.97199	87.4561	12.5439
Arf4	Arf4-201	ENSMUSG00000021877|ENSMUST00000022429	40	78.1275	31.35	11.5	556.15	492.54	0.0408605	3.92565	96.0744
Txnip	Txnip-202	ENSMUSG00000038393|ENSMUST00000074519	324	78.0976	263.43	46.2	40.75	32.74	4.21323	80.818	19.182
Tkfc	Tkfc-201	ENSMUSG00000034371|ENSMUST00000037678	491	77.9566	373.98	631.97	499.43	134.15	1.58772	61.356	38.644
Calm1	Calm1-202	ENSMUSG00000001175|ENSMUST00000110082	96	77.8424	137.63	1209.61	63.47	161.09	5.99947	85.7132	14.2868
Pccb	Pccb-201	ENSMUSG00000032527|ENSMUST00000035116	274	77.824	174.69	161.93	48.96	53.51	3.28506	76.6631	23.3369
Clta	Clta-202	ENSMUSG00000028478|ENSMUST00000107846	191	77.7985	94.99	147.96	64.76	69.06	1.8155	64.4823	35.5177
Eno1	Eno1-202	ENSMUSG00000063524|ENSMUST00000080926	265	77.7655	1625.98	1066.84	304.44	143.55	6.01089	85.7365	14.2635
Acat3	Acat3-201	ENSMUSG00000062480|ENSMUST00000043923	250	77.7225	85.56	74.05	76.28	164.99	0.661541	39.8149	60.1851
Atp11c	Atp11c-205	ENSMUSG00000062949|ENSMUST00000154051	1127	77.6842	67.86	242.55	12.82	28.73	7.47076	88.1947	11.8053
Apoh	Apoh-201	ENSMUSG00000000049|ENSMUST00000000049	51	77.6734	2085.58	9789.24	245.88	1202.14	8.20073	89.1313	10.8687
Ass1	Ass1-201	ENSMUSG00000076441|ENSMUST00000102840	193	77.6602	3059.81	5374.01	4319.26	4957.81	0.909104	47.6194	52.3806
Acsl1	Acsl1-203	ENSMUSG00000018796|ENSMUST00000110372	630	77.6447	626.54	981.79	470.31	933.85	1.1454	53.3887	46.6113
Hnrnpa3	Hnrnpa3-203	ENSMUSG00000059005|ENSMUST00000111962	199	77.5368	240.46	93	70.76	50.05	2.7602	73.4057	26.5943
Gulo	Gulo-201	ENSMUSG00000034450|ENSMUST00000059970	14	77.5035	1453.98	371.68	176.97	60.7	7.68149	88.4812	11.5188
Ugt2b1	Ugt2b1-201	ENSMUSG00000035836|ENSMUST00000031183	29	77.489	622.73	1698.81	131.54	241.24	6.22764	86.1642	13.8358
Vdac1	Vdac1-202	ENSMUSG00000020402|ENSMUST00000102758	136	77.4008	571.17	768.01	73.26	225.95	4.47572	81.7376	18.2624
Psma6	Psma6-201	ENSMUSG00000021024|ENSMUST00000021412	78	77.3912	144.23	408.49	136.67	175.01	1.77336	63.9426	36.0574
Cpt2	Cpt2-201	ENSMUSG00000028607|ENSMUST00000030345	132	77.145	284.51	207.49	28.4	6.83	13.9654	93.3179	6.68209
Ido2	Ido2-201	ENSMUSG00000031549|ENSMUST00000121992	145	77.1108	49.83	45.32	233.72	78.65	0.304607	23.3485	76.6515
Atp5a1	Atp5a1-201	ENSMUSG00000025428|ENSMUST00000026495	212	77.1062	2533.2	1708.68	161.7	52.74	19.7812	95.188	4.81204
H13	H13-204	ENSMUSG00000019188|ENSMUST00000125366	219	77.0817	4.49	1.23	519.13	101.21	0.00922075	0.91365	99.0863
Qsox1	Qsox1-201	ENSMUSG00000033684|ENSMUST00000035325	453	77.0292	931.87	79.06	51.81	16.83	14.728	93.6419	6.35809
Ttc39c	Ttc39c-204	ENSMUSG00000024424|ENSMUST00000169401	120	76.9828	189.71	371.91	105.77	181.81	1.95292	66.1352	33.8648
BC031181	BC031181-201	ENSMUSG00000036299|ENSMUST00000040284	41	76.9645	179.94	175.85	115.78	109.91	1.57645	61.187	38.813
BC031181	BC031181-201	ENSMUSG00000036299|ENSMUST00000040284	42	76.7747	54.15	110.9	53.98	377.31	0.382689	27.6772	72.3228
Uqcrq	Uqcrq-201	ENSMUSG00000044894|ENSMUST00000061326	74	76.6658	538.57	1121.81	1404.15	1052.18	0.67596	40.3327	59.6673
Pck1	Pck1-201	ENSMUSG00000027513|ENSMUST00000029017	157	76.5975	1759.47	1075.24	1382.69	681.7	1.37315	57.8619	42.1381
Ugt2b35	Ugt2b35-201	ENSMUSG00000035811|ENSMUST00000031186	525	76.5924	61.04	208.42	148.56	294.74	0.60785	37.8052	62.1948
Aco2	Aco2-201	ENSMUSG00000022477|ENSMUST00000023116	136	76.5651	157.22	167.01	7.05	16.4	13.8264	93.2553	6.74471
Ambp	Ambp-201	ENSMUSG00000028356|ENSMUST00000030041	19	76.5262	6527.62	2577.11	4322.01	808.05	1.77478	63.9611	36.0389
Hnf4a	Hnf4a-202	ENSMUSG00000017950|ENSMUST00000109411	123	76.5151	158.57	557.06	23.34	59.64	8.62413	89.6094	10.3906
Etfdh	Etfdh-201	ENSMUSG00000027809|ENSMUST00000029386	138	76.4969	276.91	81.35	93.74	71.51	2.16799	68.4342	31.5658
Serpina10	Serpina10-201	ENSMUSG00000061947|ENSMUST00000044231	29	76.4345	144.16	73.08	331.03	145.3	0.45607	31.322	68.678
Rps16	Rps16-201	ENSMUSG00000037563|ENSMUST00000082134	36	76.3545	118.1	792.89	50.51	231.95	3.2252	76.3325	23.6675
Paip2	Paip2-201	ENSMUSG00000037058|ENSMUST00000041314	32	76.2979	21.14	79.15	153.55	222.38	0.266778	21.0596	78.9404
Psma5	Psma5-201	ENSMUSG00000068749|ENSMUST00000090569	103	76.2425	188.17	368.59	13.33	3.29	33.4994	97.1014	2.8986
Sqor	Sqor-201	ENSMUSG00000005803|ENSMUST00000005953	146	76.2092	440.91	36.73	178.23	35.49	2.23489	69.087	30.913
Rpl19	Rpl19-201	ENSMUSG00000017404|ENSMUST00000017548	27	76.2037	393.53	616.31	629.4	519.7	0.87881	46.7748	53.2252
Cpn1	Cpn1-201	ENSMUSG00000025196|ENSMUST00000026210	52	76.1256	174.73	471.78	33	46.17	8.1661	89.0902	10.9098
Ube2h	Ube2h-202	ENSMUSG00000039159|ENSMUST00000102993	32	76.1141	35.68	20.93	179.03	152.2	0.170908	14.5962	85.4038
Papss2	Papss2-201	ENSMUSG00000024899|ENSMUST00000025833	395	76.1107	143.27	195.94	74.02	73.71	2.29615	69.6616	30.3384
Timd2	Timd2-204	ENSMUSG00000040413|ENSMUST00000169584	235	76.1002	133.55	24.45	264.82	7.22	0.580797	36.7408	63.2592
Fdft1	Fdft1-204	ENSMUSG00000021273|ENSMUST00000224625	52	76.0887	111.9	323	18.62	124.78	3.03278	75.2032	24.7968
Aco1	Aco1-201	ENSMUSG00000028405|ENSMUST00000102973	249	76.058	43.43	771.49	0	0	#DIV/0!	100	0
Mup21	Mup21-201	ENSMUSG00000066153|ENSMUST00000077719	80	75.9982	63.39	14.75	1458.32	403.45	0.0419708	4.02802	95.972
Atp5a1	Atp5a1-201	ENSMUSG00000025428|ENSMUST00000026495	525	75.9474	1579.41	2214.05	165.72	377.02	6.98946	87.4835	12.5165
Mug2	Mug2-201	ENSMUSG00000030131|ENSMUST00000081777	27	75.9235	177.36	599.73	246.94	218.42	1.66987	62.545	37.455
Gm4788	Gm4788-203	ENSMUSG00000070594|ENSMUST00000111989	768	75.886	3.64	62.48	50.04	705.55	0.0875078	8.04663	91.9534
Uox	Uox-201	ENSMUSG00000028186|ENSMUST00000029837	117	75.869	5643.9	6334.38	1651.27	1381.33	3.94984	79.7973	20.2027
Idh1	Idh1-201	ENSMUSG00000025950|ENSMUST00000097709	269	75.8513	157.97	596.79	600.59	2099.21	0.279561	21.8482	78.1518
Slc25a1	Slc25a1-201	ENSMUSG00000003528|ENSMUST00000003622	211	75.6684	372.89	174.57	39.97	11.38	10.6613	91.4247	8.57534
Cyp2c37	Cyp2c37-201	ENSMUSG00000042248|ENSMUST00000049178	24	75.6299	174.15	94.95	132.02	26	1.70295	63.0034	36.9966
Gch1	Gch1-201	ENSMUSG00000037580|ENSMUST00000089959	164	75.5662	513.67	350.51	182.55	112.11	2.9328	74.5728	25.4272
Bbox1	Bbox1-201	ENSMUSG00000041660|ENSMUST00000046233	56	75.5534	52.76	127.15	269.15	476.02	0.241435	19.448	80.552
Aco1	Aco1-201	ENSMUSG00000028405|ENSMUST00000102973	702	75.4664	303.7	438.55	1.23	11.54	58.1245	98.3087	1.69135
Trap1	Trap1-201	ENSMUSG00000005981|ENSMUST00000006137	641	75.4355	95.92	288.96	61.55	245.37	1.25401	55.6346	44.3654
Creb3l3	Creb3l3-201	ENSMUSG00000035041|ENSMUST00000117422	379	75.418	419.12	431.5	50.15	74.9	6.80224	87.1832	12.8168
Ugt2b1	Ugt2b1-201	ENSMUSG00000035836|ENSMUST00000031183	65	75.411	1853.09	858.58	73.32	138.96	12.774	92.74	7.26004
Lypla1	Lypla1-201	ENSMUSG00000025903|ENSMUST00000027036	163	75.4095	110.19	254.27	147.13	251.23	0.914901	47.778	52.222
Mdh2	Mdh2-201	ENSMUSG00000019179|ENSMUST00000019323	295	75.3056	211.78	569.37	81.5	280.05	2.16056	68.36	31.64
Cyp4a12a	Cyp4a12a-201	ENSMUSG00000066071|ENSMUST00000084343	400	75.2803	97.29	64.28	331.63	159.23	0.329157	24.7643	75.2357
Hnrnpa2b1	Hnrnpa2b1-201	ENSMUSG00000004980|ENSMUST00000069949	131	75.2608	197.37	698.92	82.22	114.98	4.54508	81.966	18.034
Dld	Dld-201	ENSMUSG00000020664|ENSMUST00000110857	197	75.239	320.54	117.26	58.84	38	4.52086	81.8869	18.1131
Acss2	Acss2-201	ENSMUSG00000027605|ENSMUST00000029135	678	75.2217	35.4	384.77	75.6	206.97	1.48696	59.7902	40.2098
Atp6v1e1	Atp6v1e1-201	ENSMUSG00000019210|ENSMUST00000019354	27	75.1483	427.71	55.81	74.57	26.82	4.76891	82.6657	17.3343
Hp	Hp-201	ENSMUSG00000031722|ENSMUST00000074898	64	75.1244	6018	7131.82	1911.62	691.47	5.05162	83.4755	16.5245
Cyp2c50	Cyp2c50-202	ENSMUSG00000054827|ENSMUST00000080171	437	75.1204	57.21	52.46	1014.79	40.96	0.103879	9.41034	90.5897
Cyp3a25	Cyp3a25-203	ENSMUSG00000029630|ENSMUST00000145062	23	75.1067	280.14	142.47	40.59	81.18	3.47056	77.6314	22.3686
Abhd14b	Abhd14b-201	ENSMUSG00000042073|ENSMUST00000048527	70	75.0999	321.97	419.62	327.4	111.39	1.69008	62.8264	37.1736
Acsl5	Acsl5-201	ENSMUSG00000024981|ENSMUST00000043150	223	75.0842	25.8	13.86	428.17	1091.7	0.0260943	2.54307	97.4569
Car3	Car3-201	ENSMUSG00000027559|ENSMUST00000029076	63	74.96	1322.61	15351.5	676.94	2312.58	5.57754	84.7967	15.2033
Hsp90aa1	Hsp90aa1-202	ENSMUSG00000021270|ENSMUST00000094361	698	74.941	353.78	67.58	450.29	45.43	0.849996	45.9458	54.0542
Slc25a20	Slc25a20-201	ENSMUSG00000032602|ENSMUST00000035222	47	74.9184	417.19	216.6	34.59	7.35	15.1118	93.7934	6.20662
Fah	Fah-201	ENSMUSG00000030630|ENSMUST00000032865	170	74.8653	839.69	1038.43	567.92	821.27	1.35195	57.4821	42.5179
Pigr	Pigr-201	ENSMUSG00000026417|ENSMUST00000027675	54	74.8078	29.59	37.95	1739.41	2368.94	0.0164397	1.61738	98.3826
Rpsa	Rpsa-201	ENSMUSG00000032518|ENSMUST00000035105	125	74.7199	100.97	19.67	555.9	138.39	0.17376	14.8037	85.1963
Acp1	Acp1-201	ENSMUSG00000044573|ENSMUST00000062740	16	74.7131	21.17	14.45	271.22	81.64	0.100947	9.16907	90.8309
Gulo	Gulo-201	ENSMUSG00000034450|ENSMUST00000059970	21	74.7056	363.17	247.51	577.89	658.13	0.49407	33.0687	66.9313
Hnrnpk	Hnrnpk-202	ENSMUSG00000021546|ENSMUST00000116403	327	74.7008	294.02	516.06	172.76	279.44	1.79142	64.1759	35.8241
Clec4f	Clec4f-201	ENSMUSG00000014542|ENSMUST00000014686	16	74.6787	264.21	78.66	107.76	80.23	1.82387	64.5877	35.4123
Ddx3x	Ddx3x-201	ENSMUSG00000000787|ENSMUST00000000804	76	74.6213	86.26	251.85	49.69	120.06	1.99181	66.5754	33.4246
Atp5f1	Atp5f1-201	ENSMUSG00000000563|ENSMUST00000118209	242	74.6211	1089.81	185.92	865.61	80.62	1.34822	57.4146	42.5854
Ddc	Ddc-210	ENSMUSG00000020182|ENSMUST00000178704	300	74.5259	35.92	56.88	35.94	262.19	0.311274	23.7383	76.2617
Mdh2	Mdh2-201	ENSMUSG00000019179|ENSMUST00000019323	134	74.5211	177.35	800.92	50.09	137.31	5.22022	83.9234	16.0766
Tcp1	Tcp1-209	ENSMUSG00000068039|ENSMUST00000151287	14	74.5126	147.01	203.73	17.29	3.47	16.895	94.4118	5.58816
Got2	Got2-201	ENSMUSG00000031672|ENSMUST00000034097	323	74.4886	911.58	365.24	818.29	220.07	1.22965	55.1499	44.8501
Ces3a	Ces3a-201	ENSMUSG00000069922|ENSMUST00000093222	411	74.4472	162.43	346.15	1247.08	4516.8	0.0882357	8.10814	91.8919
Zfand6	Zfand6-208	ENSMUSG00000030629|ENSMUST00000209117	122	74.4216	181.24	167.16	54.91	28.54	4.17496	80.6762	19.3238
Hprt	Hprt-201	ENSMUSG00000025630|ENSMUST00000026723	99	74.3775	204.79	93.61	10.62	85.17	3.11515	75.6995	24.3005
Ces2a	Ces2a-201	ENSMUSG00000055730|ENSMUST00000034346	60	74.3031	285.75	143.69	746.99	449.03	0.359058	26.4196	73.5804
Sod1	Sod1-201	ENSMUSG00000022982|ENSMUST00000023707	17	74.2461	674.32	3110.77	487.25	934.12	2.66299	72.6999	27.3001
Ces2c	Ces2c-201	ENSMUSG00000061825|ENSMUST00000055052	556	74.2244	76.39	175.06	12.85	61.56	3.37925	77.165	22.835
Serinc1	Serinc1-201	ENSMUSG00000019877|ENSMUST00000020027	414	74.0786	228.54	130.28	282.18	64.48	1.03508	50.8618	49.1382
Rhoa	Rhoa-201	ENSMUSG00000007815|ENSMUST00000007959	45	74.0463	385.01	259.1	57.12	202.23	2.48356	71.2937	28.7063
Rab1a	Rab1a-201	ENSMUSG00000020149|ENSMUST00000020358	144	73.9919	529.19	92.98	103.62	44.18	4.20954	80.8044	19.1956
Btf3	Btf3-201	ENSMUSG00000021660|ENSMUST00000022163	136	73.9837	377.23	186.95	15.85	28.37	12.7585	92.7318	7.26824
Rpn2	Rpn2-202	ENSMUSG00000027642|ENSMUST00000116380	146	73.9549	200.46	115.34	268.27	226.71	0.638006	38.9501	61.0499
Ppara	Ppara-202	ENSMUSG00000022383|ENSMUST00000109422	341	73.9204	158.49	82	122.87	55.79	1.34608	57.3756	42.6244
Arf4	Arf4-201	ENSMUSG00000021877|ENSMUST00000022429	29	73.8362	594.96	358.22	6.73	11.33	52.7785	98.1405	1.85948
Hsd3b3	Hsd3b3-204	ENSMUSG00000062410|ENSMUST00000107019	311	73.8257	163.54	417.84	9.28	55.3	9.00248	90.0025	9.99752
Idi1	Idi1-201	ENSMUSG00000058258|ENSMUST00000169314	124	73.7983	293.41	637.09	31.45	60.48	10.1218	91.0087	8.99132
Bhmt2	Bhmt2-201	ENSMUSG00000042118|ENSMUST00000015941	271	73.6999	278.1	485.78	73.91	60.63	5.67772	85.0248	14.9752
Morf4l2	Morf4l2-201	ENSMUSG00000031422|ENSMUST00000033797	106	73.6782	52.24	12.2	172.67	146.75	0.201741	16.7874	83.2126
Gsta4	Gsta4-201	ENSMUSG00000032348|ENSMUST00000034903	84	73.5893	3.3	2.24	474.83	207.01	0.00812507	0.805959	99.194
Atp5a1	Atp5a1-201	ENSMUSG00000025428|ENSMUST00000026495	178	73.5762	1452.35	2836.62	117.43	55.05	24.8665	96.134	3.86601
Ywhab	Ywhab-201	ENSMUSG00000018326|ENSMUST00000018470	94	73.569	56.96	173.58	96.77	403.04	0.461255	31.5657	68.4343
Cfhr1	Cfhr1-201	ENSMUSG00000057037|ENSMUST00000023965	45	73.3528	162.48	382.17	229.8	234	1.17432	54.0086	45.9914
Aco2	Aco2-201	ENSMUSG00000022477|ENSMUST00000023116	42	73.2992	216.26	98.54	21.85	14.07	8.76392	89.7582	10.2418
Tkfc	Tkfc-201	ENSMUSG00000034371|ENSMUST00000037678	16	73.2632	185.28	265.98	514.31	691.3	0.3743	27.2357	72.7643
Crp	Crp-201	ENSMUSG00000037942|ENSMUST00000038495	66	73.2442	893.85	202.37	1313.44	524.75	0.596358	37.3574	62.6426
Txn2	Txn2-201	ENSMUSG00000005354|ENSMUST00000005487	97	73.1678	257.86	96.4	63.76	123.38	1.89302	65.4341	34.5659
Fgg	Fgg-201	ENSMUSG00000033860|ENSMUST00000048486	285	73.1486	11254.8	14049.3	827.2	2303.36	8.08293	88.9903	11.0097
Aox3	Aox3-201	ENSMUSG00000064294|ENSMUST00000040999	1057	73.1124	387.71	253.15	353.49	513.52	0.739161	42.501	57.499
Msra	Msra-201	ENSMUSG00000054733|ENSMUST00000067927	213	72.8847	156.59	253.57	66.93	257.92	1.26261	55.8033	44.1967
Fmo5	Fmo5-202	ENSMUSG00000028088|ENSMUST00000107049	179	72.8636	399.64	630.94	1370.8	747.79	0.486446	32.7254	67.2746
Anpep	Anpep-202	ENSMUSG00000039062|ENSMUST00000107392	15	72.8207	5.12	277.8	2.02	70.87	3.88147	79.5143	20.4857
Ugt2b36	Ugt2b36-201	ENSMUSG00000070704|ENSMUST00000094649	61	72.6938	1531.94	771.8	588.76	122.94	3.23695	76.3981	23.6019
Lect2	Lect2-201	ENSMUSG00000021539|ENSMUST00000062806	53	72.6406	245.66	75.16	211.59	68.74	1.14444	53.3677	46.6323
Ido2	Ido2-201	ENSMUSG00000031549|ENSMUST00000121992	213	72.5736	81.29	183.4	47.65	18.61	3.99472	79.9788	20.0212
Rtraf	Rtraf-201	ENSMUSG00000021807|ENSMUST00000022341	17	72.5367	256.2	18.79	68.1	36.96	2.61746	72.3563	27.6437
Hgd	Hgd-203	ENSMUSG00000022821|ENSMUST00000160847	123	72.5257	886.42	1721.75	95.84	235.54	7.87063	88.7268	11.2732
Cyp2c54	Cyp2c54-201	ENSMUSG00000067225|ENSMUST00000048959	34	72.504	87.05	197.71	46.93	48.13	2.99558	74.9724	25.0276
Dld	Dld-201	ENSMUSG00000020664|ENSMUST00000110857	192	72.4848	192.28	84.2	85.92	60.82	1.88415	65.3277	34.6723
Ces3a	Ces3a-201	ENSMUSG00000069922|ENSMUST00000093222	115	72.4795	2173.57	649.54	1314.15	1365.29	1.05362	51.3055	48.6945
Cyp2c54	Cyp2c54-201	ENSMUSG00000067225|ENSMUST00000048959	35	72.4675	24.24	15.58	176.58	196.02	0.106871	9.65521	90.3448
Hsd3b3	Hsd3b3-204	ENSMUSG00000062410|ENSMUST00000107019	243	72.3767	230.6	108.13	166.46	160.36	1.03644	50.8947	49.1053
Eif3i	Eif3i-201	ENSMUSG00000028798|ENSMUST00000102593	31	72.3641	74.82	327.93	20.13	89.11	3.68684	78.6636	21.3364
Rpl7a	Rpl7a-201	ENSMUSG00000062647|ENSMUST00000102898	29	72.3621	0	0	146.31	389.31	0	0	100
Cyp3a11	Cyp3a11-201	ENSMUSG00000056035|ENSMUST00000035918	25	72.2998	3755.1	5198.35	1112.35	332.91	6.19504	86.1015	13.8985
Dld	Dld-201	ENSMUSG00000020664|ENSMUST00000110857	358	72.2444	157.84	83.7	96.92	128.7	1.07056	51.7039	48.2961
Tst	Tst-201	ENSMUSG00000044986|ENSMUST00000058659	220	72.235	407.65	302.41	444.55	829.61	0.557277	35.7853	64.2147
Acsl1	Acsl1-203	ENSMUSG00000018796|ENSMUST00000110372	27	72.2343	42.08	147.58	723.78	1987.74	0.069946	6.53734	93.4627
Ehhadh	Ehhadh-201	ENSMUSG00000022853|ENSMUST00000023559	126	72.2299	411.73	165.16	89.6	67.99	3.6607	78.544	21.456
Psmd13	Psmd13-201	ENSMUSG00000025487|ENSMUST00000026560	342	72.1512	91.03	73.14	108.82	103.18	0.774387	43.6425	56.3575
Hspa9	Hspa9-201	ENSMUSG00000024359|ENSMUST00000025217	625	72.1366	278.01	86.58	685.22	495.96	0.308666	23.5863	76.4137
Mrps28	Mrps28-201	ENSMUSG00000040269|ENSMUST00000042148	145	72.0735	136.59	175.27	29.52	10.93	7.70977	88.5186	11.4814
Fgb	Fgb-201	ENSMUSG00000033831|ENSMUST00000048246	45	72.0137	3651.62	10611.2	4889.33	7326.78	1.16755	53.8649	46.1351
Acox1	Acox1-201	ENSMUSG00000020777|ENSMUST00000066587	565	71.8426	1803.18	3179.52	256.8	416.16	7.40415	88.1011	11.8989
Sardh	Sardh-202	ENSMUSG00000009614|ENSMUST00000102886	458	71.8238	218.71	862.17	56.9	99.53	6.90967	87.3573	12.6427
Me1	Me1-201	ENSMUSG00000032418|ENSMUST00000034989	520	71.7885	300.28	312.67	79.67	86.54	3.6878	78.6681	21.3319
Srsf1	Srsf1-205	ENSMUSG00000018379|ENSMUST00000139129	31	71.5547	26.05	29.54	96.37	210.49	0.181158	15.3373	84.6627
Sucla2	Sucla2-203	ENSMUSG00000022110|ENSMUST00000160507	379	71.546	229.87	168.15	88.77	72.12	2.47386	71.2136	28.7864
Acsm1	Acsm1-201	ENSMUSG00000033533|ENSMUST00000047929	514	71.5203	333.37	69.95	840.05	122.14	0.419169	29.5362	70.4638
Aldh1l1	Aldh1l1-203	ENSMUSG00000030088|ENSMUST00000130418	445	71.4963	693.41	159.85	1422.67	661.77	0.409347	29.0452	70.9548
C1ra	C1ra-201	ENSMUSG00000055172|ENSMUST00000068593	384	71.4598	209.86	1118.18	145.55	316.89	2.87181	74.1723	25.8277
Rpl12	Rpl12-203	ENSMUSG00000038900|ENSMUST00000126610	131	71.4504	87.4	119.31	208.67	141.09	0.591005	37.1467	62.8533
Serpina1b	Serpina1b-203	ENSMUSG00000071178|ENSMUST00000186166	26	71.4386	6395.94	2893.23	965.98	779.53	5.32175	84.1816	15.8184
Ftcd	Ftcd-201	ENSMUSG00000001155|ENSMUST00000001183	501	71.4188	126.61	559.96	69.36	340.86	1.67366	62.5981	37.4019
Mrpl12	Mrpl12-201	ENSMUSG00000039640|ENSMUST00000043627	79	71.3242	31.16	98.38	154.51	91.47	0.526628	34.4962	65.5038
Cyp2c68	Cyp2c68-201	ENSMUSG00000074882|ENSMUST00000099472	426	71.3204	126.23	78.9	184.52	91.67	0.742713	42.6182	57.3818
Cd5l	Cd5l-201	ENSMUSG00000015854|ENSMUST00000015998	36	71.2552	106.79	194.84	54.94	70.95	2.39598	70.5534	29.4466
Sord	Sord-201	ENSMUSG00000027227|ENSMUST00000110551	313	71.113	3228.85	2162.72	660.66	528.2	4.53508	81.9334	18.0666
Psmb1	Psmb1-201	ENSMUSG00000014769|ENSMUST00000014913	97	71.0949	15.03	24.67	978.96	245.64	0.0324187	3.14008	96.8599
Slc25a15	Slc25a15-201	ENSMUSG00000031482|ENSMUST00000033871	201	71.0291	563.6	269.86	63.22	12.44	11.0159	91.6777	8.32233
St13	St13-205	ENSMUSG00000022403|ENSMUST00000172107	237	71.0263	147.34	288.96	337.05	98.64	1.0014	50.035	49.965
Eef1g	Eef1g-201	ENSMUSG00000071644|ENSMUST00000052248	433	71.022	100.42	210.23	12.37	46.49	5.27778	84.0708	15.9292
Ndufa9	Ndufa9-203	ENSMUSG00000000399|ENSMUST00000205002	66	70.9424	299.82	175.79	40.68	39.26	5.94959	85.6107	14.3893
Erp44	Erp44-201	ENSMUSG00000028343|ENSMUST00000030028	372	70.9367	227.78	287.98	8.71	40.05	10.5775	91.3626	8.63743
Fech	Fech-201	ENSMUSG00000024588|ENSMUST00000025484	402	70.8771	141.78	228.36	15	22.27	9.93131	90.852	9.14803
Ugt1a1	Ugt1a1-201	ENSMUSG00000089960|ENSMUST00000073049	47	70.8616	53.19	1335.55	3.64	34.1	36.7976	97.3543	2.64567
Crot	Crot-201	ENSMUSG00000003623|ENSMUST00000003720	174	70.8184	10.73	21.58	1733.28	650.03	0.0135568	1.33754	98.6625
Pcbp1	Pcbp1-201	ENSMUSG00000051695|ENSMUST00000053015	22	70.7997	463.24	376.55	59.63	85.7	5.7785	85.2475	14.7525
Gys2	Gys2-201	ENSMUSG00000030244|ENSMUST00000032371	217	70.7835	347.07	111.47	77.88	48.72	3.62196	78.3642	21.6358
Idi1	Idi1-201	ENSMUSG00000058258|ENSMUST00000169314	85	70.7662	63.18	119.08	779.42	66.21	0.215532	17.7315	82.2685
Hmgcs2	Hmgcs2-201	ENSMUSG00000027875|ENSMUST00000090746	14	70.7649	638.29	977.78	4844.61	3280.77	0.198892	16.5896	83.4104
Hnrnpf	Hnrnpf-210	ENSMUSG00000042079|ENSMUST00000180341	208	70.7482	20.93	80.72	141.36	547.77	0.147505	12.8544	87.1456
2010107E04Rik	2010107E04Rik-201	ENSMUSG00000021290|ENSMUST00000021719	27	70.6923	893.36	294.11	54.25	7.64	19.1868	95.0463	4.95374
Atp2a2	Atp2a2-203	ENSMUSG00000029467|ENSMUST00000179939	149	70.6532	102.02	216.14	25.77	200.7	1.40487	58.4176	41.5824
Rdh7	Rdh7-201	ENSMUSG00000040134|ENSMUST00000047199	29	70.6224	1668.97	2262.65	222.12	213.66	9.02203	90.022	9.97802
Sucla2	Sucla2-203	ENSMUSG00000022110|ENSMUST00000160507	162	70.6202	272.17	195.49	17.91	31.46	9.47255	90.4512	9.54877
Eif3h	Eif3h-201	ENSMUSG00000022312|ENSMUST00000022925	74	70.6041	213.92	90.71	1.32	6.27	40.1357	97.569	2.43098
Galm	Galm-201	ENSMUSG00000035473|ENSMUST00000039205	142	70.6032	127.86	160.99	15.5	54.42	4.13115	80.5112	19.4888
Hsd17b11	Hsd17b11-201	ENSMUSG00000029311|ENSMUST00000031251	47	70.4876	34.41	8.58	362.42	462.33	0.0521249	4.95425	95.0458
Ttr	Ttr-201	ENSMUSG00000061808|ENSMUST00000075312	30	70.4834	27846.9	18271.2	17620.9	7592.9	1.82908	64.6529	35.3471
Serpind1	Serpind1-201	ENSMUSG00000022766|ENSMUST00000023450	147	70.4428	63.33	311.55	1136.79	764.97	0.197123	16.4664	83.5336
Rpsa	Rpsa-201	ENSMUSG00000032518|ENSMUST00000035105	45	70.4	141.15	194.09	326.03	117.93	0.755113	43.0236	56.9764
Ybx1	Ybx1-201	ENSMUSG00000028639|ENSMUST00000079644	263	70.396	12.59	16.43	281.25	409.22	0.0420293	4.03341	95.9666
Sqor	Sqor-201	ENSMUSG00000005803|ENSMUST00000005953	113	70.2603	94.96	480.17	23	72.97	5.99281	85.6996	14.3004
Cyp2c68	Cyp2c68-201	ENSMUSG00000074882|ENSMUST00000099472	99	70.2536	78.95	104.65	121.04	173.83	0.622647	38.3723	61.6277
Bnip3	Bnip3-201	ENSMUSG00000078566|ENSMUST00000106112	112	70.2284	61.08	34.85	312.68	360.12	0.142583	12.479	87.521
Prodh	Prodh-201	ENSMUSG00000003526|ENSMUST00000003620	547	70.2248	92.32	254.87	34.62	46.42	4.28418	81.0756	18.9244
Ddt	Ddt-202	ENSMUSG00000001666|ENSMUST00000172820	64	70.2227	458.18	1555.41	77.14	63.22	14.3459	93.4836	6.5164
Cyp2d10	Cyp2d10-201	ENSMUSG00000094806|ENSMUST00000072776	66	70.2002	447.64	358.26	717.91	342.97	0.759652	43.1706	56.8294
Cyp2c67	Cyp2c67-201	ENSMUSG00000062624|ENSMUST00000067328	92	70.1628	150.89	62.54	143.21	106.68	0.854096	46.0654	53.9346
Edf1	Edf1-201	ENSMUSG00000015092|ENSMUST00000015236	143	70.0938	33.27	7.59	718.78	170.79	0.0459323	4.39152	95.6085
Keg1	Keg1-201	ENSMUSG00000024694|ENSMUST00000025598	46	70.0747	523.79	270.8	206.88	153.79	2.20309	68.7802	31.2198
Cyp2c54	Cyp2c54-201	ENSMUSG00000067225|ENSMUST00000048959	203	70.068	170.24	86.99	21.51	3.96	10.0993	90.9904	9.00955
Eef1a1	Eef1a1-201	ENSMUSG00000037742|ENSMUST00000042235	93	70.0418	4244.51	1169.24	3024.11	987.75	1.34944	57.4366	42.5634
Ak3	Ak3-201	ENSMUSG00000024782|ENSMUST00000025696	205	69.8585	386.01	259.32	330.68	247.69	1.11577	52.736	47.264
Cs	Cs-201	ENSMUSG00000005683|ENSMUST00000005826	90	69.7683	103.71	29.9	266.25	73.91	0.392786	28.2014	71.7986
Hspd1	Hspd1-201	ENSMUSG00000025980|ENSMUST00000027123	464	69.6735	211.82	743.46	281.26	498.21	1.22555	55.0673	44.9327
Cyp1a2	Cyp1a2-201	ENSMUSG00000032310|ENSMUST00000034860	281	69.6365	548.06	499.26	679.99	1822.33	0.41854	29.505	70.495
Aqp9	Aqp9-202	ENSMUSG00000032204|ENSMUST00000074465	51	69.6078	119.87	210.76	166.49	677.93	0.391547	28.1375	71.8625
Inmt	Inmt-201	ENSMUSG00000003477|ENSMUST00000003569	85	69.589	1955.84	285.32	2171.41	46.65	1.01041	50.259	49.741
Mup16	Mup16-202	ENSMUSG00000078675|ENSMUST00000107483	19	69.5519	449.59	2401.86	4201.24	14451.8	0.152868	13.2598	86.7402
Bbox1	Bbox1-201	ENSMUSG00000041660|ENSMUST00000046233	324	69.524	311.5	426.78	37.64	46.49	8.77547	89.7703	10.2297
Gcdh	Gcdh-201	ENSMUSG00000003809|ENSMUST00000003907	351	69.5224	1178.42	90.96	152.71	73.75	5.60532	84.8607	15.1393
Bzw1	Bzw1-201	ENSMUSG00000051223|ENSMUST00000050552	31	69.4639	14.16	58.76	154.45	188.7	0.212502	17.5259	82.4741
Sod2	Sod2-201	ENSMUSG00000006818|ENSMUST00000007012	111	69.432	334.87	637.15	232.81	123.94	2.72465	73.1519	26.8481
Aldh1a7	Aldh1a7-201	ENSMUSG00000024747|ENSMUST00000025656	81	69.3049	187.91	258.87	75.26	142.92	2.04776	67.189	32.811
Echdc1	Echdc1-201	ENSMUSG00000019883|ENSMUST00000020034	249	69.2921	222.07	111.33	40.53	31.44	4.63249	82.2458	17.7542
Dad1	Dad1-201	ENSMUSG00000022174|ENSMUST00000022781	78	69.2826	115.4	152.13	126.07	467.62	0.450622	31.0641	68.9359
Fdft1	Fdft1-204	ENSMUSG00000021273|ENSMUST00000224625	268	69.2251	206.85	132.14	127.27	56.61	1.84354	64.8326	35.1674
Aox3	Aox3-201	ENSMUSG00000064294|ENSMUST00000040999	958	69.2212	172.25	250.59	412.1	738.75	0.367415	26.8693	73.1307
Fh1	Fh1-201	ENSMUSG00000026526|ENSMUST00000027810	491	69.128	165.36	201.29	11.6	20.4	11.4578	91.9729	8.02709
Akr1c19	Akr1c19-202	ENSMUSG00000071551|ENSMUST00000118663	237	68.9773	87.08	37.65	524.57	38.83	0.221388	18.1259	81.8741
Psmb6	Psmb6-201	ENSMUSG00000018286|ENSMUST00000018430	130	68.9739	311.4	262.09	158.44	55.53	2.68024	72.8278	27.1722
Cbs	Cbs-201	ENSMUSG00000024039|ENSMUST00000067801	427	68.9156	524.89	661.23	155.86	80.66	5.01488	83.3746	16.6254
Laptm4a	Laptm4a-201	ENSMUSG00000020585|ENSMUST00000020909	104	68.8799	471.25	366.24	139.74	111.81	3.32932	76.9017	23.0983
Pccb	Pccb-201	ENSMUSG00000032527|ENSMUST00000035116	104	68.7923	113.89	218.13	50.99	64.8	2.86743	74.1431	25.8569
Ybx1	Ybx1-201	ENSMUSG00000028639|ENSMUST00000079644	309	68.7815	125.56	51.45	176.16	295.96	0.374926	27.2688	72.7312
Actb	Actb-201	ENSMUSG00000029580|ENSMUST00000100497	263	68.7724	480.97	2079.12	1120.39	2760	0.659751	39.75	60.25
Fmo1	Fmo1-201	ENSMUSG00000040181|ENSMUST00000046049	133	68.6423	327.23	312.91	62.22	27.79	7.11188	87.6724	12.3276
Lyz2	Lyz2-201	ENSMUSG00000069516|ENSMUST00000092163	56	68.6048	430.15	137.12	59.08	8.35	8.41272	89.3761	10.6239
Tmx2	Tmx2-203	ENSMUSG00000050043|ENSMUST00000111665	113	68.5969	8.06	31.37	165.24	190.25	0.110917	9.9843	90.0157
Maob	Maob-201	ENSMUSG00000040147|ENSMUST00000040820	253	68.5605	22.53	22.72	430.36	25.12	0.0993457	9.03681	90.9632
Hal	Hal-202	ENSMUSG00000020017|ENSMUST00000129421	416	68.5143	358.23	208.43	152.79	62.02	2.63796	72.5121	27.4879
Ass1	Ass1-201	ENSMUSG00000076441|ENSMUST00000102840	204	68.4885	3185.41	1840.61	6016.18	4426.95	0.481275	32.4906	67.5094
Urod	Urod-201	ENSMUSG00000028684|ENSMUST00000030446	16	68.4818	3.1	18.76	139.89	259.05	0.0547952	5.19487	94.8051
Dnaja2	Dnaja2-201	ENSMUSG00000031701|ENSMUST00000034138	385	68.4608	279.1	64.29	108.47	38.47	2.33694	70.0324	29.9676
Cyp3a25	Cyp3a25-203	ENSMUSG00000029630|ENSMUST00000145062	60	68.4296	96.61	41.08	373.42	91.01	0.296471	22.8675	77.1325
Morf4l2	Morf4l2-201	ENSMUSG00000031422|ENSMUST00000033797	105	68.4253	81.91	192.43	8.06	62.83	3.86994	79.4659	20.5341
Psmb6	Psmb6-201	ENSMUSG00000018286|ENSMUST00000018430	69	68.2939	355.85	392.63	13.32	75.99	8.3807	89.3398	10.6602
Bzw1	Bzw1-201	ENSMUSG00000051223|ENSMUST00000050552	28	68.2838	95.03	22.41	0	0	#DIV/0!	100	0
Hal	Hal-202	ENSMUSG00000020017|ENSMUST00000129421	563	68.2684	635.82	154.26	225.67	66.7	2.70233	72.99	27.01
Atp11c	Atp11c-205	ENSMUSG00000062949|ENSMUST00000154051	987	68.2495	13.78	48.05	119.56	177.71	0.207993	17.218	82.782
Ubqln1	Ubqln1-201	ENSMUSG00000005312|ENSMUST00000058735	476	68.2152	238.69	78.36	19.68	4.2	13.2768	92.9956	7.00437
Cyp2e1	Cyp2e1-201	ENSMUSG00000025479|ENSMUST00000026552	433	68.1691	1908.85	4920.31	9513.64	14949	0.279166	21.8241	78.1759
Pdha1	Pdha1-201	ENSMUSG00000031299|ENSMUST00000033662	309	68.127	12.27	8.45	169.75	178.35	0.0595231	5.61792	94.3821
F5	F5-201	ENSMUSG00000026579|ENSMUST00000086040	943	68.0953	162.4	229.67	88.13	269.94	1.09495	52.2662	47.7338
Aars	Aars-201	ENSMUSG00000031960|ENSMUST00000034441	148	68.0887	203.49	125.03	23.59	3.37	12.1855	92.4159	7.58411
Psmd11	Psmd11-214	ENSMUSG00000017428|ENSMUST00000173938	300	68.0609	223.88	117.63	52.19	38.02	3.78572	79.1045	20.8955
Psmc1	Psmc1-201	ENSMUSG00000021178|ENSMUST00000021595	196	68.0172	14.35	19.53	98.67	270.92	0.0916691	8.39715	91.6028
Asgr2	Asgr2-201	ENSMUSG00000040963|ENSMUST00000102572	268	68.0027	92.02	101.16	562.15	182.73	0.259344	20.5936	79.4064
Dhrs3	Dhrs3-206	ENSMUSG00000066026|ENSMUST00000154208	78	67.9867	104.45	351.45	16.77	17.7	13.226	92.9706	7.02939
Krt18	Krt18-201	ENSMUSG00000023043|ENSMUST00000023803	152	67.9792	310.23	374.68	127.29	226.51	1.93587	65.9385	34.0615
Acss2	Acss2-201	ENSMUSG00000027605|ENSMUST00000029135	370	67.9527	144.51	392.05	2.1	10.35	43.0972	97.7323	2.26772
Slc1a2	Slc1a2-202	ENSMUSG00000005089|ENSMUST00000080210	379	67.934	149.26	130.27	71.7	80.34	1.83853	64.7705	35.2295
Gulo	Gulo-201	ENSMUSG00000034450|ENSMUST00000059970	309	67.8863	50.01	180.88	537.47	1113.67	0.139837	12.2681	87.7319
4931406C07Rik	4931406C07Rik-203	ENSMUSG00000031938|ENSMUST00000180339	245	67.8307	271.77	206.51	161.69	196.81	1.33411	57.1572	42.8428
Uox	Uox-201	ENSMUSG00000028186|ENSMUST00000029837	9	67.7978	3209.93	2225.48	3206.11	5609.12	0.616593	38.1415	61.8585
Akr1a1	Akr1a1-201	ENSMUSG00000028692|ENSMUST00000030455	6	67.7724	103.63	444.79	22.03	594.97	0.888849	47.0577	52.9423
Idi1	Idi1-201	ENSMUSG00000058258|ENSMUST00000169314	160	67.7537	317.67	365.34	93.19	120.39	3.19791	76.1786	23.8214
Pck1	Pck1-201	ENSMUSG00000027513|ENSMUST00000029017	553	67.7468	98.74	4257.96	307.25	404.67	6.11965	85.9544	14.0456
Serpina3n	Serpina3n-201	ENSMUSG00000021091|ENSMUST00000021506	67	67.7131	174.5	216.23	557.34	85.28	0.608027	37.812	62.188
Sar1b	Sar1b-201	ENSMUSG00000020386|ENSMUST00000020653	134	67.6896	311.37	365.45	347.6	553.73	0.750913	42.8869	57.1131
Anxa6	Anxa6-202	ENSMUSG00000018340|ENSMUST00000108883	270	67.6674	173	252.18	85.98	37.3	3.4489	77.5225	22.4775
Oaz1	Oaz1-201	ENSMUSG00000035242|ENSMUST00000060987	18	67.6597	98.74	131.68	79.28	155.55	0.98122	49.5261	50.4739
Krt18	Krt18-201	ENSMUSG00000023043|ENSMUST00000023803	281	67.6557	385.91	144.78	318.72	108.91	1.241	55.3771	44.6229
Hspd1	Hspd1-201	ENSMUSG00000025980|ENSMUST00000027123	178	67.6442	441.86	670.07	244.08	299.87	2.04418	67.1504	32.8496
Kynu	Kynu-201	ENSMUSG00000026866|ENSMUST00000028223	37	67.6122	15.37	21.52	536.82	175.96	0.0517551	4.92083	95.0792
Anxa7	Anxa7-202	ENSMUSG00000021814|ENSMUST00000100844	298	67.5827	2.44	159.16	10.65	184.4	0.828506	45.3105	54.6895
Eno1	Eno1-202	ENSMUSG00000063524|ENSMUST00000080926	16	67.579	1984.23	174.74	280.93	363.88	3.34823	77.0021	22.9979
Sds	Sds-204	ENSMUSG00000029597|ENSMUST00000201684	208	67.5778	328.11	338.26	114.27	181.6	2.25224	69.252	30.748
St13	St13-205	ENSMUSG00000022403|ENSMUST00000172107	178	67.5488	295.95	537.38	23.68	8.06	26.2549	96.3309	3.66907
Uqcrc1	Uqcrc1-201	ENSMUSG00000025651|ENSMUST00000026743	126	67.5371	621.44	69.27	433.38	99.05	1.29728	56.4702	43.5298
Crot	Crot-201	ENSMUSG00000003623|ENSMUST00000003720	48	67.5355	217.17	359.26	827.46	755.06	0.364248	26.6996	73.3004
Trap1	Trap1-201	ENSMUSG00000005981|ENSMUST00000006137	458	67.5302	104.13	144.29	166.21	187.53	0.702267	41.2548	58.7452
Gamt	Gamt-202	ENSMUSG00000020150|ENSMUST00000105363	131	67.4825	291.82	535.98	102.96	261.47	2.27149	69.4329	30.5671
Ndufa6	Ndufa6-201	ENSMUSG00000022450|ENSMUST00000023085	86	67.462	133.03	597.22	28.74	158.27	3.90487	79.6121	20.3879
Cxadr	Cxadr-201	ENSMUSG00000022865|ENSMUST00000023572	14	67.4578	113.56	284.37	8.27	109.08	3.39097	77.226	22.774
Haao	Haao-201	ENSMUSG00000000673|ENSMUST00000000687	142	67.4251	258.54	930.78	145.41	776.56	1.28998	56.3314	43.6686
Hspa9	Hspa9-201	ENSMUSG00000024359|ENSMUST00000025217	335	67.4227	466.6	600.51	105	202.26	3.47299	77.6436	22.3564
Rps9	Rps9-201	ENSMUSG00000006333|ENSMUST00000006496	66	67.4082	480.84	230.46	3.76	9.03	55.6138	98.2336	1.76636
Rab7	Rab7-205	ENSMUSG00000079477|ENSMUST00000113600	20	67.3992	69.11	488.76	37.19	374.91	1.35372	57.5141	42.4859
Pdcd4	Pdcd4-202	ENSMUSG00000024975|ENSMUST00000074371	385	67.3145	49.67	30.91	135.73	297.64	0.185938	15.6786	84.3214
Aars	Aars-201	ENSMUSG00000031960|ENSMUST00000034441	264	67.3042	31.73	54.72	273.59	85.25	0.240915	19.4143	80.5857
Eef1a1	Eef1a1-201	ENSMUSG00000037742|ENSMUST00000042235	407	67.2894	3088.56	3958.27	599.24	1094.52	4.16047	80.6219	19.3781
Dlst	Dlst-201	ENSMUSG00000004789|ENSMUST00000053811	79	67.2475	26.75	30.68	238.52	248.93	0.117817	10.5399	89.4601
Cyp2c68	Cyp2c68-201	ENSMUSG00000074882|ENSMUST00000099472	92	67.164	96.35	71.47	155.67	119.44	0.610011	37.8886	62.1114
Ndufa9	Ndufa9-203	ENSMUSG00000000399|ENSMUST00000205002	107	67.0321	20.27	27.15	186.64	339.62	0.0901076	8.26593	91.7341
Anpep	Anpep-202	ENSMUSG00000039062|ENSMUST00000107392	893	67.0259	70.82	82.84	63.11	113.52	0.869954	46.5228	53.4772
Rab10	Rab10-201	ENSMUSG00000020671|ENSMUST00000021001	137	67.0237	239.78	157.65	90.54	111.14	1.9706	66.3367	33.6633
Krt18	Krt18-201	ENSMUSG00000023043|ENSMUST00000023803	310	66.9633	149.64	58.55	524.87	321.63	0.245942	19.7394	80.2606
Ivd	Ivd-201	ENSMUSG00000027332|ENSMUST00000028807	401	66.9165	176.52	288.78	79.42	95.91	2.65385	72.6316	27.3684
Psmd12	Psmd12-201	ENSMUSG00000020720|ENSMUST00000021063	420	66.8927	93.21	59.62	162.44	81.58	0.626301	38.5108	61.4892
Lactb2	Lactb2-201	ENSMUSG00000025937|ENSMUST00000027071	95	66.8349	88.14	219.79	366.51	444.98	0.379462	27.508	72.492
Hamp	Hamp-201	ENSMUSG00000050440|ENSMUST00000062620	78	66.7464	5705.31	6788.81	2505.85	2005.4	2.76955	73.4716	26.5284
Acadl	Acadl-201	ENSMUSG00000026003|ENSMUST00000027153	395	66.7071	429.43	145.27	45.95	59.8	5.43452	84.4588	15.5412
Krt8	Krt8-201	ENSMUSG00000049382|ENSMUST00000023952	197	66.6939	92.93	24.28	553.59	212.68	0.152962	13.2669	86.7331
Mug1	Mug1-201	ENSMUSG00000059908|ENSMUST00000032228	80	66.6884	3299.4	2016.27	980.97	406.36	3.83158	79.3028	20.6972
Keg1	Keg1-201	ENSMUSG00000024694|ENSMUST00000025598	37	66.6718	325.35	640.21	127.42	136.12	3.66381	78.5583	21.4417
Pck1	Pck1-201	ENSMUSG00000027513|ENSMUST00000029017	15	66.6463	265.38	592.35	2714.65	1426.28	0.207135	17.1592	82.8408
Rpl38	Rpl38-203	ENSMUSG00000057322|ENSMUST00000106599	53	66.5925	169.4	570.22	84.65	145.28	3.21672	76.2849	23.7151
Prkcsh	Prkcsh-205	ENSMUSG00000003402|ENSMUST00000216344	58	66.5747	38.17	40.76	139.28	289.71	0.18399	15.5398	84.4602
Sfr1	Sfr1-201	ENSMUSG00000025066|ENSMUST00000099353	190	66.5255	67.18	72.45	104.95	90.95	0.712762	41.6148	58.3852
Ugt2b36	Ugt2b36-201	ENSMUSG00000070704|ENSMUST00000094649	14	66.5178	846.04	829.45	382.45	846.02	1.36388	57.6967	42.3033
Itgb1	Itgb1-201	ENSMUSG00000025809|ENSMUST00000090006	529	66.4424	142.71	174.16	41.71	11.96	5.90404	85.5157	14.4843
Idi1	Idi1-201	ENSMUSG00000058258|ENSMUST00000169314	219	66.3893	294.37	525.64	9.07	30.39	20.7808	95.4088	4.5912
Dmgdh	Dmgdh-201	ENSMUSG00000042102|ENSMUST00000048001	589	66.3459	193.12	375.08	34.1	62.86	5.86015	85.4231	14.5769
Psmd8	Psmd8-207	ENSMUSG00000030591|ENSMUST00000209034	25	66.2945	29.98	344.62	6.84	16.27	16.2094	94.1892	5.81077
C1s1	C1s1-203	ENSMUSG00000038521|ENSMUST00000160505	369	66.1965	312.13	471.43	316.63	221.69	1.45557	59.2762	40.7238
Cyp2e1	Cyp2e1-201	ENSMUSG00000025479|ENSMUST00000026552	419	66.187	4381.85	9580.33	10677.9	4403.93	0.92576	48.0725	51.9275
Rdh16f2	Rdh16f2-201	ENSMUSG00000074639|ENSMUST00000092058	223	66.1551	104.85	274.07	60.26	61.21	3.11945	75.7249	24.2751
Tpi1	Tpi1-205	ENSMUSG00000023456|ENSMUST00000172132	180	66.1184	359.46	355.09	191	768.33	0.744843	42.6882	57.3118
Atp5b	Atp5b-201	ENSMUSG00000025393|ENSMUST00000026459	273	66.0953	345.7	3131.46	106.7	422.28	6.57333	86.7958	13.2042
Pklr	Pklr-202	ENSMUSG00000041237|ENSMUST00000107482	518	66.0634	130.93	422.24	160.05	195.87	1.5542	60.8488	39.1512
Acsl5	Acsl5-201	ENSMUSG00000024981|ENSMUST00000043150	656	66.0605	645.94	221.66	276.27	101.33	2.29767	69.6756	30.3244
Mbl2	Mbl2-201	ENSMUSG00000024863|ENSMUST00000025797	46	65.9745	617.56	184.32	199.16	137.96	2.37862	70.4021	29.5979
Cbs	Cbs-201	ENSMUSG00000024039|ENSMUST00000067801	489	65.9165	342.19	236.98	445.62	317.19	0.759259	43.1579	56.8421
Mgst1	Mgst1-201	ENSMUSG00000008540|ENSMUST00000008684	54	65.8968	4753.72	1764.98	15593.9	6046.97	0.301222	23.1491	76.8509
Cbr1	Cbr1-201	ENSMUSG00000051483|ENSMUST00000039659	219	65.8914	56.27	100.73	152.18	159.32	0.504013	33.5112	66.4888
Plin2	Plin2-201	ENSMUSG00000028494|ENSMUST00000000466	181	65.8808	174.7	249.29	633.45	720.78	0.313086	23.8435	76.1565
Cbs	Cbs-201	ENSMUSG00000024039|ENSMUST00000067801	276	65.8594	250.18	51.76	739.28	394.3	0.26636	21.0335	78.9665
Acox2	Acox2-204	ENSMUSG00000021751|ENSMUST00000164598	650	65.8476	75.19	131.41	111.15	247.41	0.576194	36.556	63.444
Dld	Dld-201	ENSMUSG00000020664|ENSMUST00000110857	352	65.7575	158.36	43.13	135.57	104.97	0.837657	45.5829	54.4171
Prdx3	Prdx3-201	ENSMUSG00000024997|ENSMUST00000025961	191	65.7355	427.69	167.44	36.16	12.05	12.3445	92.5063	7.4937
Hao1	Hao1-201	ENSMUSG00000027261|ENSMUST00000028704	253	65.7238	197.38	269.19	625.43	679.6	0.357517	26.3361	73.6639
Eci1	Eci1-201	ENSMUSG00000024132|ENSMUST00000024946	282	65.7209	65.18	187.84	106.63	281.68	0.651593	39.4524	60.5476
Ubxn1	Ubxn1-201	ENSMUSG00000071655|ENSMUST00000096255	284	65.6759	32.89	30.2	132.46	151.06	0.222524	18.202	81.798
Acy3	Acy3-201	ENSMUSG00000024866|ENSMUST00000054030	173	65.6338	23.62	142.59	37.38	259.03	0.560744	35.928	64.072
Cacybp	Cacybp-201	ENSMUSG00000014226|ENSMUST00000014370	40	65.6179	73.92	130.73	36.97	67.74	1.95445	66.1527	33.8473
Shmt1	Shmt1-201	ENSMUSG00000020534|ENSMUST00000018744	450	65.5943	252.58	179.89	96.13	83.82	2.40328	70.6166	29.3834
Dpys	Dpys-202	ENSMUSG00000022304|ENSMUST00000110306	184	65.5869	126	156.03	211.62	251.83	0.608545	37.832	62.168
Rgn	Rgn-201	ENSMUSG00000023070|ENSMUST00000023832	253	65.4604	391.51	200.88	3570.17	1138.65	0.125804	11.1746	88.8254
Ubxn1	Ubxn1-201	ENSMUSG00000071655|ENSMUST00000096255	280	65.4532	129.47	186.38	14.79	0	21.3556	95.5269	4.47314
Acat1	Acat1-201	ENSMUSG00000032047|ENSMUST00000034547	338	65.4353	274.28	616.32	401.99	294.07	1.27949	56.1305	43.8695
Pdhb	Pdhb-201	ENSMUSG00000021748|ENSMUST00000022268	138	65.4312	210.45	335.17	12.56	11.31	22.858	95.8085	4.19147
Eno1	Eno1-202	ENSMUSG00000063524|ENSMUST00000080926	110	65.431	826.85	657.59	992.77	620.64	0.920064	47.9184	52.0816
Ndufs8	Ndufs8-201	ENSMUSG00000059734|ENSMUST00000075092	24	65.3761	264.18	260.14	3.47	66.31	7.5139	88.2545	11.7455
Ndufa11	Ndufa11-201	ENSMUSG00000002379|ENSMUST00000002452	22	65.3483	223.44	73.77	4.56	5.56	29.3686	96.7071	3.29288
Fah	Fah-201	ENSMUSG00000030630|ENSMUST00000032865	42	65.3025	1652.99	595.95	194.29	161.65	6.31831	86.3356	13.6644
Sqstm1	Sqstm1-201	ENSMUSG00000015837|ENSMUST00000015981	166	65.2472	453.56	316.98	283.19	251.54	1.44099	59.033	40.967
Hmgcs1	Hmgcs1-201	ENSMUSG00000093930|ENSMUST00000179869	342	65.2412	339.89	130.44	488.47	107.66	0.788972	44.102	55.898
Bdh1	Bdh1-201	ENSMUSG00000046598|ENSMUST00000089759	332	65.2144	161.29	441.6	24.26	63.23	6.89096	87.3273	12.6727
Tst	Tst-201	ENSMUSG00000044986|ENSMUST00000058659	292	65.1698	451.24	754.42	226.02	297.93	2.3011	69.707	30.293
Cdo1	Cdo1-201	ENSMUSG00000033022|ENSMUST00000035804	86	65.0927	2632.01	359.74	1552.8	874.69	1.23245	55.2061	44.7939
Pgam1	Pgam1-201	ENSMUSG00000011752|ENSMUST00000011896	101	65.0495	147.2	1222.64	5.82	44.03	27.4792	96.4887	3.51133
Eif3i	Eif3i-201	ENSMUSG00000028798|ENSMUST00000102593	304	65.0009	94.71	291.18	14.04	35.5	7.78946	88.6227	11.3773
Lgals9	Lgals9-202	ENSMUSG00000001123|ENSMUST00000108268	290	64.9131	73.83	52.37	1750.9	871.61	0.0481218	4.59124	95.4088
Hprt	Hprt-201	ENSMUSG00000025630|ENSMUST00000026723	72	64.8837	92.61	3.68	238.3	47.67	0.336714	25.1897	74.8103
Plin2	Plin2-201	ENSMUSG00000028494|ENSMUST00000000466	100	64.8465	35.1	46.43	585.97	1114.77	0.047938	4.5745	95.4255
Uba1	Uba1-201	ENSMUSG00000001924|ENSMUST00000001989	213	64.7975	220.64	53.38	8.48	2.35	25.3019	96.198	3.802
Slc25a10	Slc25a10-201	ENSMUSG00000025792|ENSMUST00000026899	284	64.7733	244.28	107.78	113.5	34.51	2.37862	70.4021	29.5979
Mup20	Mup20-201	ENSMUSG00000078672|ENSMUST00000074018	48	64.741	24147.8	9938.48	41962.7	16172.4	0.586329	36.9614	63.0386
Dnase1l3	Dnase1l3-201	ENSMUSG00000025279|ENSMUST00000026315	41	64.6626	159.77	142.22	34.4	14.94	6.12059	85.9562	14.0438
Eif3h	Eif3h-201	ENSMUSG00000022312|ENSMUST00000022925	113	64.6511	23.31	131.96	65.77	94.43	0.969226	49.2186	50.7814
Gstm2	Gstm2-201	ENSMUSG00000040562|ENSMUST00000012348	39	64.6355	13.82	34.61	103.22	206.26	0.156488	13.5313	86.4687
Bdh1	Bdh1-201	ENSMUSG00000046598|ENSMUST00000089759	335	64.6163	203.8	324.33	36.19	93.64	4.06786	80.2678	19.7322
Lrp1	Lrp1-201	ENSMUSG00000040249|ENSMUST00000049149	3563	64.577	276.02	40.64	58.36	83.38	2.23409	69.0794	30.9206
Hmgcs1	Hmgcs1-201	ENSMUSG00000093930|ENSMUST00000179869	218	64.5747	482.15	233.79	71.05	56.52	5.61213	84.8763	15.1237
Papss2	Papss2-201	ENSMUSG00000024899|ENSMUST00000025833	528	64.5401	88.91	106.65	96.8	103.11	0.97824	49.45	50.55
Mup17	Mup17-201	ENSMUSG00000096688|ENSMUST00000107484	62	64.5315	470.37	1523.79	1690.05	13232.5	0.133634	11.7881	88.2119
Gpt	Gpt-201	ENSMUSG00000022546|ENSMUST00000023203	305	64.4127	63.1	55.51	445.27	258.41	0.168557	14.4244	85.5756
Ly6e	Ly6e-210	ENSMUSG00000022587|ENSMUST00000188866	36	64.3435	224.32	52.09	2278.32	742.09	0.0915141	8.38414	91.6159
Serpina3n	Serpina3n-201	ENSMUSG00000021091|ENSMUST00000021506	66	64.244	136.6	276.65	134	390.53	0.787848	44.0668	55.9332
Man1a	Man1a-201	ENSMUSG00000003746|ENSMUST00000003843	271	64.2427	27.48	21.68	212.35	59.9	0.180569	15.2951	84.7049
Tgoln1	Tgoln1-201	ENSMUSG00000056429|ENSMUST00000070524	36	64.1134	225.44	290.95	49.92	10.21	8.58789	89.5702	10.4298
Serbp1	Serbp1-201	ENSMUSG00000036371|ENSMUST00000042990	349	64.0472	34.4	266.73	147.09	51.29	1.51795	60.2851	39.7149
Hspa9	Hspa9-201	ENSMUSG00000024359|ENSMUST00000025217	630	64.0467	261.64	802.97	144.35	63.68	5.11758	83.6537	16.3463
4931406C07Rik	4931406C07Rik-203	ENSMUSG00000031938|ENSMUST00000180339	256	64.0055	7.71	25.76	489.11	361.66	0.0393408	3.78517	96.2148
Ufc1	Ufc1-201	ENSMUSG00000062963|ENSMUST00000080001	51	63.9976	31.44	72.7	46	193.59	0.434659	30.297	69.703
Hnrnpc	Hnrnpc-201	ENSMUSG00000060373|ENSMUST00000111610	200	63.9764	48.98	77.81	111.1	95.77	0.612897	37.9998	62.0002
Acp1	Acp1-201	ENSMUSG00000044573|ENSMUST00000062740	56	63.9475	107.76	89.86	16.03	68.27	2.34425	70.0979	29.9021
Ywhae	Ywhae-201	ENSMUSG00000020849|ENSMUST00000067664	18	63.888	105.46	273.77	390.82	184.82	0.658797	39.7154	60.2846
Amacr	Amacr-201	ENSMUSG00000022244|ENSMUST00000070877	261	63.8616	108.51	553.15	4.53	64.78	9.54639	90.5181	9.48192
Lrp1	Lrp1-201	ENSMUSG00000040249|ENSMUST00000049149	2057	63.8151	61.81	91.43	237.53	61.51	0.51244	33.8817	66.1183
Aox3	Aox3-201	ENSMUSG00000064294|ENSMUST00000040999	211	63.7289	88.5	56.42	489.22	832.01	0.109686	9.88439	90.1156
Copa	Copa-206	ENSMUSG00000026553|ENSMUST00000135192	597	63.6567	187.36	69.1	22.65	7.26	8.57439	89.5555	10.4445
Aox3	Aox3-201	ENSMUSG00000064294|ENSMUST00000040999	348	63.6066	479.25	349.61	328.6	179.95	1.62985	61.975	38.025
Gpd1	Gpd1-201	ENSMUSG00000023019|ENSMUST00000023760	33	63.6012	150.46	207.69	254.68	527.72	0.457758	31.4015	68.5985
Slc25a20	Slc25a20-201	ENSMUSG00000032602|ENSMUST00000035222	184	63.5937	165.49	160.73	104.5	106.32	1.54739	60.7441	39.2559
Lyz2	Lyz2-201	ENSMUSG00000069516|ENSMUST00000092163	73	63.5866	7.89	31.33	305.55	345.08	0.06028	5.68529	94.3147
Cpt2	Cpt2-201	ENSMUSG00000028607|ENSMUST00000030345	202	63.5855	70.23	357.75	0	2.24	191.062	99.4793	0.520664
Ecm1	Ecm1-202	ENSMUSG00000028108|ENSMUST00000117507	30	63.5623	225.19	202	31.24	9.29	10.5401	91.3346	8.66544
Ces1g	Ces1g-201	ENSMUSG00000057074|ENSMUST00000044602	252	63.5519	167.97	513.31	4.43	101.88	6.40843	86.5019	13.4981
Copa	Copa-206	ENSMUSG00000026553|ENSMUST00000135192	526	63.5273	91.65	102.73	51.69	92.02	1.35259	57.4936	42.5064
Hmgcs2	Hmgcs2-201	ENSMUSG00000027875|ENSMUST00000090746	479	63.4865	895.38	453.96	3669.66	3507.73	0.187999	15.8248	84.1752
Ndufs2	Ndufs2-201	ENSMUSG00000013593|ENSMUST00000013737	455	63.4828	48.57	71.19	316.27	171.36	0.245596	19.7172	80.2828
C4bp	C4bp-201	ENSMUSG00000026405|ENSMUST00000027657	190	63.4562	985.61	545.88	363.31	231.87	2.57315	72.0135	27.9865
Hoga1	Hoga1-201	ENSMUSG00000025176|ENSMUST00000081714	278	63.4414	84.74	102.61	80.85	89.64	1.09889	52.3558	47.6442
Pon1	Pon1-201	ENSMUSG00000002588|ENSMUST00000002663	56	63.4394	210.34	125.84	1634.08	1794.4	0.0980551	8.92989	91.0701
Aadac	Aadac-201	ENSMUSG00000027761|ENSMUST00000029325	19	63.4321	510.81	870.98	772.53	478.82	1.10424	52.4769	47.5231
Cyp2c68	Cyp2c68-201	ENSMUSG00000074882|ENSMUST00000099472	27	63.4234	193.15	19.78	164.26	24.29	1.1293	53.0363	46.9637
Ube2l3	Ube2l3-202	ENSMUSG00000038965|ENSMUST00000115699	36	63.2559	211.86	175.44	98.24	94.12	2.01341	66.815	33.185
Glrx	Glrx-201	ENSMUSG00000021591|ENSMUST00000022082	21	63.2486	305.45	14.38	53.12	65.99	2.68516	72.8642	27.1358
Atp5b	Atp5b-201	ENSMUSG00000025393|ENSMUST00000026459	399	63.244	1598.03	1116.82	791.37	383.43	2.3109	69.7968	30.2032
Glyat	Glyat-201	ENSMUSG00000063683|ENSMUST00000044976	31	63.2196	448.34	159.54	949.31	360.17	0.464215	31.704	68.296
Acad11	Acad11-201	ENSMUSG00000090150|ENSMUST00000047799	576	63.1646	202.27	91.98	304.84	128.78	0.67859	40.4262	59.5738
Sdha	Sdha-201	ENSMUSG00000021577|ENSMUST00000022062	650	63.1569	868.16	360.75	66.19	77.39	8.55906	89.5387	10.4613
Sqstm1	Sqstm1-201	ENSMUSG00000015837|ENSMUST00000015981	156	63.148	142.9	286.8	193.7	663.93	0.501032	33.3792	66.6208
Aldh1l1	Aldh1l1-203	ENSMUSG00000030088|ENSMUST00000130418	420	63.125	866.05	720.88	155.72	510.82	2.38085	70.4216	29.5784
Rps4x	Rps4x-201	ENSMUSG00000031320|ENSMUST00000033683	142	63.1094	72.4	65.37	278.73	216.63	0.278121	21.7601	78.2399
Mdh1	Mdh1-201	ENSMUSG00000020321|ENSMUST00000102874	42	63.0995	1841.04	1534.57	181.95	270.35	7.46321	88.1842	11.8158
Hadha	Hadha-205	ENSMUSG00000025745|ENSMUST00000156859	654	63.0943	70.79	444.6	29.91	243.3	1.88642	65.3551	34.6449
Rpl30	Rpl30-206	ENSMUSG00000058600|ENSMUST00000142643	56	63.0794	414.49	246.44	130	74.62	3.23004	76.3595	23.6405
Acsf2	Acsf2-201	ENSMUSG00000076435|ENSMUST00000103164	338	63.0436	227.45	193.66	148.43	139.01	1.46504	59.4326	40.5674
Bhmt2	Bhmt2-201	ENSMUSG00000042118|ENSMUST00000015941	182	62.9757	385.66	367.86	8.26	8.27	45.585	97.8534	2.14661
Plin2	Plin2-201	ENSMUSG00000028494|ENSMUST00000000466	102	62.9238	127.94	301.3	853.3	428.12	0.334972	25.0921	74.9079
Hmgcs1	Hmgcs1-201	ENSMUSG00000093930|ENSMUST00000179869	88	62.9089	276.51	386.45	162.49	142.18	2.17599	68.5138	31.4862
Slc1a2	Slc1a2-202	ENSMUSG00000005089|ENSMUST00000080210	187	62.8899	218.69	166.81	14.32	16.26	12.6063	92.6505	7.34955
Txn1	Txn1-201	ENSMUSG00000028367|ENSMUST00000030051	19	62.8707	541.93	1177.01	150.11	89.68	7.16852	87.7579	12.2421
Hyou1	Hyou1-201	ENSMUSG00000032115|ENSMUST00000066601	82	62.8186	300.92	116.33	93.67	27.67	3.43868	77.4708	22.5292
Actb	Actb-201	ENSMUSG00000029580|ENSMUST00000100497	183	62.7968	3250.33	1788.63	181.21	262.08	11.3672	91.9141	8.08591
Sec11a	Sec11a-201	ENSMUSG00000025724|ENSMUST00000026818	41	62.7673	130.74	292.25	27.81	12.41	10.5169	91.3171	8.68289
Tubb2a	Tubb2a-201	ENSMUSG00000058672|ENSMUST00000056427	376	62.7057	107.76	442.19	42.87	102.53	3.78232	79.0897	20.9103
Suclg2	Suclg2-204	ENSMUSG00000061838|ENSMUST00000204224	124	62.6882	61.55	129.76	356.63	291.15	0.295332	22.7997	77.2003
Ces1f	Ces1f-201	ENSMUSG00000031725|ENSMUST00000034178	52	62.6797	106.53	177.7	700.75	757.73	0.194881	16.3097	83.6903
Elovl5	Elovl5-201	ENSMUSG00000032349|ENSMUST00000034904	46	62.676	233.83	367.15	508.66	699.27	0.497529	33.2233	66.7767
C8b	C8b-201	ENSMUSG00000029656|ENSMUST00000031663	32	62.6511	101.7	258.68	655.8	761.34	0.254301	20.2743	79.7257
Sec61g	Sec61g-203	ENSMUSG00000078974|ENSMUST00000109643	49	62.6509	295.57	1033.68	3.37	3.47	194.335	99.4881	0.511942
Slco1b2	Slco1b2-201	ENSMUSG00000030236|ENSMUST00000042812	533	62.6316	270.07	254.72	747.38	1669.03	0.217178	17.8427	82.1573
Prdx6	Prdx6-202	ENSMUSG00000026701|ENSMUST00000071718	104	62.6097	152.58	1043.33	221.69	1144.55	0.875329	46.676	53.324
Qprt	Qprt-201	ENSMUSG00000030674|ENSMUST00000032912	266	62.5091	96.57	385.86	74.32	196.34	1.78242	64.0601	35.9399
Nme2	Nme2-201	ENSMUSG00000020857|ENSMUST00000021217	134	62.4723	629	1219.15	110.46	156.91	6.91233	87.3615	12.6385
Acy3	Acy3-201	ENSMUSG00000024866|ENSMUST00000054030	236	62.3735	288.93	85.34	46.76	0	8.00406	88.8939	11.1061
Hnrnpa3	Hnrnpa3-203	ENSMUSG00000059005|ENSMUST00000111962	174	62.3307	179.6	97.04	7.5	10.1	15.7182	94.0185	5.98151
Arpc2	Arpc2-201	ENSMUSG00000006304|ENSMUST00000006467	25	62.3209	213.58	47.14	98.19	20.42	2.19813	68.7317	31.2683
Plpp3	Plpp3-201	ENSMUSG00000028517|ENSMUST00000064139	83	62.3179	265.19	189.55	94.19	56.88	3.01013	75.0631	24.9369
Aldh1l1	Aldh1l1-203	ENSMUSG00000030088|ENSMUST00000130418	443	62.2751	983.51	950.18	261.25	195.64	4.23229	80.8879	19.1121
Rpl11	Rpl11-201	ENSMUSG00000059291|ENSMUST00000102536	111	62.2353	119.79	104.52	92.36	50.73	1.56761	61.0533	38.9467
Ces2a	Ces2a-201	ENSMUSG00000055730|ENSMUST00000034346	361	62.2216	693.09	609.42	15.48	29.09	29.2239	96.6914	3.30864
Higd1a	Higd1a-205	ENSMUSG00000038412|ENSMUST00000215007	18	62.2116	104.97	172.06	75.82	107.2	1.51366	60.2174	39.7826
Dnase1l3	Dnase1l3-201	ENSMUSG00000025279|ENSMUST00000026315	62	62.1057	21.3	0	57.63	268.86	0.0652394	6.12439	93.8756
Dad1	Dad1-201	ENSMUSG00000022174|ENSMUST00000022781	81	62.089	32.39	19.98	465.1	277.38	0.0705339	6.58866	93.4113
Rraga	Rraga-201	ENSMUSG00000070934|ENSMUST00000091064	264	62.0372	61.64	27.47	95.5	115.19	0.422944	29.7231	70.2769
Pzp	Pzp-201	ENSMUSG00000030359|ENSMUST00000112132	897	61.908	377.93	1834.44	1355.19	7275.04	0.256351	20.4044	79.5956
Psmd13	Psmd13-201	ENSMUSG00000025487|ENSMUST00000026560	101	61.8987	141.58	120.86	16.43	49.61	3.97396	79.8953	20.1047
Hao1	Hao1-201	ENSMUSG00000027261|ENSMUST00000028704	200	61.8836	332.6	212.08	561.77	389.07	0.572841	36.4208	63.5792
Ubxn1	Ubxn1-201	ENSMUSG00000071655|ENSMUST00000096255	20	61.7516	142.44	29.5	32.41	94.06	1.35953	57.6187	42.3813
Gm45233	Gm45233-201	ENSMUSG00000107482|ENSMUST00000203633	89	61.6849	398.81	940.02	55.91	111.99	7.97397	88.8567	11.1433
Ubqln1	Ubqln1-201	ENSMUSG00000005312|ENSMUST00000058735	257	61.6521	25.48	43.59	165.39	84.53	0.276368	21.6527	78.3473
Me1	Me1-201	ENSMUSG00000032418|ENSMUST00000034989	267	61.6323	238.08	233.84	109.98	130.06	1.96601	66.2846	33.7154
Rpl7a	Rpl7a-201	ENSMUSG00000062647|ENSMUST00000102898	24	61.6302	252.15	104.37	0	0	#DIV/0!	100	0
Gstk1	Gstk1-201	ENSMUSG00000029864|ENSMUST00000031897	128	61.6292	21.74	37.66	206.96	576.42	0.0758253	7.0481	92.9519
Psmb1	Psmb1-201	ENSMUSG00000014769|ENSMUST00000014913	210	61.5375	371.16	139.7	416.32	71.01	1.04828	51.1786	48.8214
Eif5	Eif5-202	ENSMUSG00000021282|ENSMUST00000166123	78	61.5091	15.8	12.29	166.57	172.61	0.0828174	7.64832	92.3517
Cfhr2	Cfhr2-201	ENSMUSG00000033898|ENSMUST00000094489	116	61.4944	978.06	1019.39	304.48	298.08	3.31494	76.8247	23.1753
Glrx	Glrx-201	ENSMUSG00000021591|ENSMUST00000022082	59	61.4872	263.57	107.75	29.94	22.96	7.01928	87.5301	12.4699
Ndufs6	Ndufs6-204	ENSMUSG00000021606|ENSMUST00000223293	21	61.4455	103.95	554.25	6.27	105.87	5.86945	85.4428	14.5572
Ugp2	Ugp2-202	ENSMUSG00000001891|ENSMUST00000102875	76	61.4398	646.9	357.09	35.59	102.84	7.25269	87.8827	12.1173
Psmb2	Psmb2-201	ENSMUSG00000028837|ENSMUST00000030642	193	61.3188	71.86	152.53	245.85	298.47	0.412239	29.1905	70.8095
Ptges3	Ptges3-201	ENSMUSG00000071072|ENSMUST00000052798	62	61.302	353.24	365.16	129.69	81.08	3.40845	77.3163	22.6837
Gapdh	Gapdh-203	ENSMUSG00000057666|ENSMUST00000118875	60	61.2878	646.26	231.44	632.42	750.1	0.634855	38.8325	61.1675
Ido2	Ido2-201	ENSMUSG00000031549|ENSMUST00000121992	78	61.2628	21.28	51.81	60.09	181	0.303165	23.2637	76.7363
Akr1c6	Akr1c6-201	ENSMUSG00000021210|ENSMUST00000021630	315	61.2261	2430.91	2357.33	920.13	299.13	3.92717	79.7044	20.2956
1300017J02Rik	1300017J02Rik-201	ENSMUSG00000033688|ENSMUST00000035163	201	61.2056	289.42	311.25	938.48	526.07	0.41014	29.085	70.915
Adh4	Adh4-201	ENSMUSG00000037797|ENSMUST00000013458	232	61.1817	354.5	135.3	51.44	17.2	7.13578	87.7086	12.2914
Akr1d1	Akr1d1-201	ENSMUSG00000038641|ENSMUST00000040987	119	61.1392	34.56	64.53	228.86	273.07	0.197418	16.487	83.513
Dpyd	Dpyd-201	ENSMUSG00000033308|ENSMUST00000039177	997	61.0907	154.42	442.65	32.32	72.43	5.69995	85.0745	14.9255
Tcp1	Tcp1-209	ENSMUSG00000068039|ENSMUST00000151287	535	61.0365	133.8	95.38	36.64	22.38	3.88309	79.5212	20.4788
Srsf5	Srsf5-201	ENSMUSG00000021134|ENSMUST00000094693	230	60.9923	13.3	39.5	67.96	436.23	0.104722	9.47952	90.5205
Elovl6	Elovl6-205	ENSMUSG00000041220|ENSMUST00000199910	87	60.9651	192.88	68.14	22.69	29.26	5.02445	83.401	16.599
Hspa9	Hspa9-201	ENSMUSG00000024359|ENSMUST00000025217	125	60.9149	125.63	47.78	534.09	613.22	0.151145	13.13	86.87
Hprt	Hprt-201	ENSMUSG00000025630|ENSMUST00000026723	80	60.8728	93.53	165.19	53.6	52.65	2.43501	70.888	29.112
Rpl27a	Rpl27a-203	ENSMUSG00000046364|ENSMUST00000143107	120	60.867	271.27	682.56	9.18	7.26	58.0189	98.3056	1.69437
Hmgcs2	Hmgcs2-201	ENSMUSG00000027875|ENSMUST00000090746	20	60.8467	140.13	1261.56	4454.58	2631.81	0.1978	16.5136	83.4864
Acsl5	Acsl5-201	ENSMUSG00000024981|ENSMUST00000043150	483	60.7964	337.3	197.92	480.89	174.7	0.816394	44.9459	55.0541
Ecm1	Ecm1-202	ENSMUSG00000028108|ENSMUST00000117507	1	60.7811	41.9	276.12	87.09	9.82	3.2816	76.6443	23.3557
Kynu	Kynu-201	ENSMUSG00000026866|ENSMUST00000028223	397	60.7592	21.79	15.94	459.13	170.26	0.0599469	5.65565	94.3443
Rps24	Rps24-207	ENSMUSG00000025290|ENSMUST00000224568	85	60.7236	356.3	341.53	38.68	61.74	6.94911	87.42	12.58
Dpys	Dpys-202	ENSMUSG00000022304|ENSMUST00000110306	387	60.7195	106.43	68.87	368.26	156.48	0.33407	25.0414	74.9586
Tst	Tst-201	ENSMUSG00000044986|ENSMUST00000058659	171	60.7162	735.14	496.69	157.18	255.88	2.98221	74.8883	25.1117
Hsd17b4	Hsd17b4-201	ENSMUSG00000024507|ENSMUST00000025385	315	60.6786	89.88	756.1	148.95	262.54	2.05589	67.2764	32.7236
Trap1	Trap1-201	ENSMUSG00000005981|ENSMUST00000006137	333	60.6386	211.81	151.09	53.07	20.6	4.92602	83.1253	16.8747
Aqp1	Aqp1-201	ENSMUSG00000004655|ENSMUST00000004774	35	60.6003	158.65	286.71	1.23	1.23	181.041	99.4507	0.549328
Atp5g3	Atp5g3-202	ENSMUSG00000018770|ENSMUST00000111996	27	60.4961	1985	1440.07	257.86	788.44	3.27351	76.6	23.4
Gm4788	Gm4788-203	ENSMUSG00000070594|ENSMUST00000111989	376	60.4614	403.99	192.18	9.67	32.19	14.242	93.4392	6.56082
Rdh11	Rdh11-203	ENSMUSG00000066441|ENSMUST00000161204	18	60.4443	132.04	112.64	54.08	46.67	2.42859	70.8335	29.1665
Cyp2c67	Cyp2c67-201	ENSMUSG00000062624|ENSMUST00000067328	91	60.4439	90.83	177.45	13.44	50.75	4.17947	80.693	19.307
Hmgcl	Hmgcl-201	ENSMUSG00000028672|ENSMUST00000030432	209	60.4396	26.1	59.62	202.19	417.7	0.138283	12.1484	87.8516
Uqcrc1	Uqcrc1-201	ENSMUSG00000025651|ENSMUST00000026743	414	60.4264	19.54	49.15	265.5	810.48	0.0638395	6.00086	93.9991
Mug1	Mug1-201	ENSMUSG00000059908|ENSMUST00000032228	1311	60.2916	2443.49	954.95	2419.22	860.27	1.03627	50.8906	49.1094
Ugt2b1	Ugt2b1-201	ENSMUSG00000035836|ENSMUST00000031183	209	60.2914	639.25	667.41	643.78	417.18	1.23158	55.1888	44.8112
Cpox	Cpox-201	ENSMUSG00000022742|ENSMUST00000060077	290	60.27	178.06	88.66	108.45	2.35	2.40722	70.6506	29.3494
Lifr	Lifr-201	ENSMUSG00000054263|ENSMUST00000067190	620	60.2283	140.2	116.06	425.74	160.73	0.436953	30.4083	69.5917
Dnajc3	Dnajc3-201	ENSMUSG00000022136|ENSMUST00000022734	178	60.0906	212.56	319.73	51.7	25.73	6.87447	87.3007	12.6993
Abcg2	Abcg2-201	ENSMUSG00000029802|ENSMUST00000031822	32	60.0774	163.54	88.53	37.79	39	3.28259	76.6496	23.3504
Saa1	Saa1-201	ENSMUSG00000074115|ENSMUST00000128088	44	60.0421	3.37	1.12	183.67	212.45	0.0113349	1.12079	98.8792
Suclg1	Suclg1-201	ENSMUSG00000052738|ENSMUST00000064740	151	60.0397	333.78	297.65	11.26	12.67	26.3865	96.3486	3.65143
Hgd	Hgd-203	ENSMUSG00000022821|ENSMUST00000160847	411	60.0021	38.74	39.14	1599.1	829	0.0320745	3.10777	96.8922
F11	F11-201	ENSMUSG00000031645|ENSMUST00000034064	68	59.9569	88.44	68.79	53.74	47.86	1.54754	60.7464	39.2536
Gm4952	Gm4952-201	ENSMUSG00000071633|ENSMUST00000092931	211	59.9467	81.41	203.76	35.73	107.97	1.98448	66.4933	33.5067
Scarb1	Scarb1-201	ENSMUSG00000037936|ENSMUST00000086075	177	59.9178	162.51	174.34	16.23	0	20.7548	95.4033	4.59669
Aldh3a2	Aldh3a2-202	ENSMUSG00000010025|ENSMUST00000074127	288	59.8842	62.96	56.44	217.43	159.34	0.316904	24.0643	75.9357
Psmd13	Psmd13-201	ENSMUSG00000025487|ENSMUST00000026560	368	59.8528	49.87	185.01	12.05	56.51	3.4259	77.4057	22.5943
Krt18	Krt18-201	ENSMUSG00000023043|ENSMUST00000023803	155	59.8468	106.18	69.39	280.13	467.2	0.23493	19.0237	80.9763
Cnbp	Cnbp-201	ENSMUSG00000030057|ENSMUST00000032138	4	59.7811	51.94	137.69	529.42	701.08	0.154108	13.353	86.647
Cyp2e1	Cyp2e1-201	ENSMUSG00000025479|ENSMUST00000026552	101	59.7709	11003.5	8727.82	3771.61	3530.41	2.70218	72.9889	27.0111
Cyp2c44	Cyp2c44-201	ENSMUSG00000025197|ENSMUST00000026211	229	59.6536	115.6	993	102	532.55	1.74706	63.5975	36.4025
Hnrnpk	Hnrnpk-202	ENSMUSG00000021546|ENSMUST00000116403	244	59.6474	480.02	351.32	135.91	18.48	5.38468	84.3375	15.6625
F5	F5-201	ENSMUSG00000026579|ENSMUST00000086040	858	59.6263	437.43	85.83	87.79	3.68	5.72056	85.1203	14.8797
Crip2	Crip2-201	ENSMUSG00000006356|ENSMUST00000084882	32	59.6165	8.06	107.71	53.85	229.65	0.40836	28.9954	71.0046
Rpl15	Rpl15-202	ENSMUSG00000012405|ENSMUST00000080281	27	59.6079	98.16	16.31	597.09	316.58	0.125286	11.1337	88.8663
Fabp2	Fabp2-201	ENSMUSG00000023057|ENSMUST00000023820	16	59.5698	140.24	47.51	115.95	105.22	0.848895	45.9136	54.0864
Idi1	Idi1-201	ENSMUSG00000058258|ENSMUST00000169314	218	59.5164	246.72	216.71	201.6	160.83	1.27867	56.1148	43.8852
Rps3	Rps3-201	ENSMUSG00000030744|ENSMUST00000032998	180	59.5131	143.24	413.45	29.48	24.09	10.3918	91.2218	8.77823
Nat8f1	Nat8f1-201	ENSMUSG00000057103|ENSMUST00000161198	113	59.4764	39.07	380.72	618.22	159.65	0.539666	35.0508	64.9492
Ido2	Ido2-201	ENSMUSG00000031549|ENSMUST00000121992	402	59.4704	82.88	78.28	82.79	54	1.17816	54.0896	45.9104
Lap3	Lap3-201	ENSMUSG00000039682|ENSMUST00000046122	246	59.4688	163.5	89.14	612.05	260.81	0.289439	22.4469	77.5531
Sdhc	Sdhc-202	ENSMUSG00000058076|ENSMUST00000111336	53	59.4657	97.98	173.22	988.14	352.58	0.202279	16.8247	83.1753
Gm4788	Gm4788-203	ENSMUSG00000070594|ENSMUST00000111989	42	59.4472	70.59	74.98	223.15	247.12	0.309546	23.6376	76.3624
Spr	Spr-204	ENSMUSG00000033735|ENSMUST00000204757	163	59.4398	103.01	347.5	25.95	47.75	6.11275	85.9407	14.0593
Cldn1	Cldn1-201	ENSMUSG00000022512|ENSMUST00000023154	54	59.4282	211.9	129.26	37.42	22.73	5.67182	85.0116	14.9884
Baat	Baat-201	ENSMUSG00000039653|ENSMUST00000043056	281	59.3995	455.64	142.44	177.79	191.52	1.61945	61.8241	38.1759
Hsp90aa1	Hsp90aa1-202	ENSMUSG00000021270|ENSMUST00000094361	449	59.3904	227.61	38.22	234.85	83.73	0.834421	45.4869	54.5131
Apob	Apob-202	ENSMUSG00000020609|ENSMUST00000037811	66	59.3815	394.44	536.32	1080.06	2048.34	0.297519	22.9299	77.0701
Cct4	Cct4-204	ENSMUSG00000007739|ENSMUST00000173867	462	59.3478	237.42	17.03	10.35	1.12	22.184	95.6867	4.31333
Rpl7a	Rpl7a-201	ENSMUSG00000062647|ENSMUST00000102898	156	59.3405	133.25	109.1	106.31	71.98	1.3593	57.6146	42.3854
Agxt	Agxt-201	ENSMUSG00000026272|ENSMUST00000027491	352	59.3352	476.06	346.63	39.56	36.52	10.8135	91.5351	8.4649
Mut	Mut-201	ENSMUSG00000023921|ENSMUST00000169611	316	59.3342	200.54	115.07	20.14	2.35	14.0333	93.3481	6.65188
Atp5g1	Atp5g1-201	ENSMUSG00000006057|ENSMUST00000090541	122	59.3142	381.24	1054.38	91.57	142.91	6.12257	85.9601	14.0399
Csde1	Csde1-201	ENSMUSG00000068823|ENSMUST00000029446	617	59.2869	0	14.4	49.75	231.14	0.0512656	4.87656	95.1234
Selenok	Selenok-201	ENSMUSG00000042682|ENSMUST00000112268	29	59.2868	155.24	255.24	31.22	87.5	3.45755	77.5661	22.4339
Acaa2	Acaa2-201	ENSMUSG00000036880|ENSMUST00000041053	252	59.2824	137.44	146.18	1799.69	3214.53	0.0565631	5.3535	94.6465
Apof	Apof-201	ENSMUSG00000047631|ENSMUST00000050901	61	59.2686	816.19	386.4	2468.69	775.74	0.370663	27.0426	72.9574
C1qa	C1qa-201	ENSMUSG00000036887|ENSMUST00000046285	33	59.2233	68.52	55.94	106.51	54.12	0.774824	43.6564	56.3436
Ivd	Ivd-201	ENSMUSG00000027332|ENSMUST00000028807	406	59.1981	55.32	33.33	248.17	224.05	0.18773	15.8058	84.1942
Prdx1	Prdx1-204	ENSMUSG00000028691|ENSMUST00000135573	96	59.175	4654.59	3430.76	1385.6	495.57	4.29804	81.1251	18.8749
Steap4	Steap4-201	ENSMUSG00000012428|ENSMUST00000115421	363	59.1403	6.59	17.95	51.29	298.34	0.0701885	6.55852	93.4415
Akr1a1	Akr1a1-201	ENSMUSG00000028692|ENSMUST00000030455	273	59.1223	403.46	280.74	259.45	88.1	1.96864	66.3145	33.6855
Plin2	Plin2-201	ENSMUSG00000028494|ENSMUST00000000466	336	59.098	152.56	488.41	313.39	559.36	0.734426	42.344	57.656
Gstm6	Gstm6-205	ENSMUSG00000068762|ENSMUST00000106685	145	59.0218	118.79	396.08	19.7	3.68	22.0218	95.6563	4.34371
Hsd17b4	Hsd17b4-201	ENSMUSG00000024507|ENSMUST00000025385	163	58.9985	49.3	48.72	560.79	540.86	0.0889756	8.17058	91.8294
Hist2h2aa1	Hist2h2aa1-201	ENSMUSG00000064220|ENSMUST00000078756	41	58.9708	89.04	151.31	115.43	154.15	0.891572	47.1339	52.8661
Ndufs4	Ndufs4-201	ENSMUSG00000021764|ENSMUST00000022286	90	58.9692	180.99	138.75	116.68	136.17	1.26454	55.841	44.159
Ctsa	Ctsa-201	ENSMUSG00000017760|ENSMUST00000017904	152	58.9547	302.68	185.59	9.5	1.12	45.9765	97.8713	2.12873
Pdha1	Pdha1-201	ENSMUSG00000031299|ENSMUST00000033662	298	58.9252	130.95	151.13	1.12	3.56	60.2735	98.368	1.63203
Csde1	Csde1-201	ENSMUSG00000068823|ENSMUST00000029446	66	58.8456	20.38	6.02	192.02	64.58	0.102884	9.32862	90.6714
Pygl	Pygl-201	ENSMUSG00000021069|ENSMUST00000071250	275	58.8277	658.3	320.25	143.83	221.45	2.6789	72.818	27.182
Tpt1	Tpt1-201	ENSMUSG00000060126|ENSMUST00000110894	49	58.7973	599.93	1072.07	52.38	32.27	19.7519	95.1812	4.81883
Psap	Psap-204	ENSMUSG00000004207|ENSMUST00000177779	21	58.7911	514.38	623.94	79.18	25.82	10.8411	91.5549	8.44513
Ugp2	Ugp2-202	ENSMUSG00000001891|ENSMUST00000102875	212	58.7718	238.25	137.29	756.15	308.04	0.352888	26.0841	73.9159
Rab18	Rab18-201	ENSMUSG00000073639|ENSMUST00000097680	125	58.7605	265.37	93.28	34.69	12.81	7.55053	88.3048	11.6952
Psmb1	Psmb1-201	ENSMUSG00000014769|ENSMUST00000014913	41	58.7211	290.07	137.69	353.9	188.99	0.787931	44.0694	55.9306
Comt	Comt-204	ENSMUSG00000000326|ENSMUST00000165430	220	58.7055	271.49	323.07	2667.43	796.82	0.171627	14.6486	85.3514
Gpi1	Gpi1-201	ENSMUSG00000036427|ENSMUST00000038027	453	58.7047	68.53	100.1	152.12	160.71	0.539047	35.0247	64.9753
Selenop	Selenop-201	ENSMUSG00000064373|ENSMUST00000082424	65	58.7017	1545.45	712.84	3165.57	1879.03	0.447665	30.9232	69.0768
Dhcr24	Dhcr24-201	ENSMUSG00000034926|ENSMUST00000047973	460	58.6949	375.99	170.26	259.47	137.59	1.37574	57.9078	42.0922
Blvrb	Blvrb-201	ENSMUSG00000040466|ENSMUST00000037399	155	58.6748	383.96	332.48	60.19	30.67	7.8851	88.7452	11.2548
Mup21	Mup21-201	ENSMUSG00000066153|ENSMUST00000077719	117	58.6668	513.18	442.34	224.42	273.34	1.91964	65.7492	34.2508
Atp5f1	Atp5f1-201	ENSMUSG00000000563|ENSMUST00000118209	91	58.6434	731.37	420.72	184.61	233.7	2.75415	73.3628	26.6372
Eef1a1	Eef1a1-201	ENSMUSG00000037742|ENSMUST00000042235	19	58.64	4980.86	1926.25	747.68	251.44	6.91319	87.3629	12.6371
Anxa5	Anxa5-201	ENSMUSG00000027712|ENSMUST00000029266	304	58.6376	214.58	92.48	54.86	29.78	3.62784	78.3916	21.6084
Mup16	Mup16-202	ENSMUSG00000078675|ENSMUST00000107483	20	58.5973	90.66	27.13	10844.1	7179.73	0.00653523	0.64928	99.3507
Rpl39	Rpl39-201	ENSMUSG00000079641|ENSMUST00000115231	39	58.5929	275.84	582.97	348.2	153.34	1.71235	63.1315	36.8685
Tmsb4x	Tmsb4x-201	ENSMUSG00000049775|ENSMUST00000112172	16	58.5549	191.21	31.72	2069.75	659.66	0.081677	7.55096	92.449
Pebp1	Pebp1-201	ENSMUSG00000032959|ENSMUST00000036951	143	58.4658	212.64	476.76	1.12	5.71	100.937	99.019	0.980998
Hibch	Hibch-201	ENSMUSG00000041426|ENSMUST00000044478	170	58.4562	0	1.89	199.66	112.04	0.00606352	0.602698	99.3973
Serpind1	Serpind1-201	ENSMUSG00000022766|ENSMUST00000023450	54	58.3421	430.29	374.83	736.15	676.53	0.569924	36.3026	63.6974
Kynu	Kynu-201	ENSMUSG00000026866|ENSMUST00000028223	379	58.3418	233.24	198.26	60.32	123.52	2.34715	70.1238	29.8762
Keg1	Keg1-201	ENSMUSG00000024694|ENSMUST00000025598	15	58.2963	219.23	74.69	249.98	341.49	0.496931	33.1967	66.8033
Rpl17	Rpl17-201	ENSMUSG00000062328|ENSMUST00000079716	102	58.2744	190.19	113.43	122.11	60.78	1.66012	62.4078	37.5922
Pipox	Pipox-201	ENSMUSG00000017453|ENSMUST00000017597	137	58.2259	167.33	56.28	520.05	257.6	0.287546	22.3329	77.6671
Thrsp	Thrsp-201	ENSMUSG00000035686|ENSMUST00000043077	16	58.2237	278.37	81.11	2037.98	364.7	0.149616	13.0145	86.9855
Csde1	Csde1-201	ENSMUSG00000068823|ENSMUST00000029446	780	58.2119	191.49	83.52	1.12	1.12	122.772	99.1921	0.807935
Asl	Asl-205	ENSMUSG00000025533|ENSMUST00000161094	284	58.1734	616.27	401.8	673.47	552.24	0.830596	45.373	54.627
Slc25a13	Slc25a13-201	ENSMUSG00000015112|ENSMUST00000015256	461	58.1378	237.44	171.44	116.18	29.31	2.81036	73.7558	26.2442
Me1	Me1-201	ENSMUSG00000032418|ENSMUST00000034989	308	58.1247	114.42	165.6	160.5	245.58	0.689569	40.8133	59.1867
Slc39a4	Slc39a4-201	ENSMUSG00000063354|ENSMUST00000073428	285	58.0627	175.71	98.9	1.12	13.56	18.7064	94.9255	5.07449
Txndc9	Txndc9-204	ENSMUSG00000058407|ENSMUST00000193832	112	57.9903	45.53	176.43	25.9	76.02	2.17779	68.5316	31.4684
Ddx3x	Ddx3x-201	ENSMUSG00000000787|ENSMUST00000000804	325	57.9741	142.24	176.62	36	49.15	3.74469	78.9238	21.0762
C4bp	C4bp-201	ENSMUSG00000026405|ENSMUST00000027657	133	57.9184	155.76	60.67	1024.72	909.87	0.111874	10.0617	89.9383
Cd5l	Cd5l-201	ENSMUSG00000015854|ENSMUST00000015998	148	57.8782	308.55	33.6	2.24	1.12	101.83	99.0275	0.972475
Decr1	Decr1-201	ENSMUSG00000028223|ENSMUST00000029877	180	57.841	41.02	76.84	146.67	452.05	0.196853	16.4476	83.5524
Cfh	Cfh-202	ENSMUSG00000026365|ENSMUST00000111976	32	57.7763	787.48	302.68	354.93	113.94	2.32508	69.9255	30.0745
Rab11a	Rab11a-208	ENSMUSG00000004771|ENSMUST00000172298	124	57.7711	96.03	76.54	196.19	27.7	0.77078	43.5277	56.4723
Smim7	Smim7-203	ENSMUSG00000044600|ENSMUST00000167290	41	57.7594	13.71	21.49	107.89	157.57	0.1326	11.7076	88.2924
Tat	Tat-201	ENSMUSG00000001670|ENSMUST00000001720	119	57.7577	1319.76	383.82	330.9	339.06	2.54281	71.7738	28.2262
Lipa	Lipa-201	ENSMUSG00000024781|ENSMUST00000049572	63	57.7246	333.01	363.28	4.88	0	142.682	99.304	0.69598
Bnip3	Bnip3-201	ENSMUSG00000078566|ENSMUST00000106112	173	57.7154	115.38	199.17	76.19	181.73	1.21956	54.9461	45.0539
St13	St13-205	ENSMUSG00000022403|ENSMUST00000172107	211	57.7056	327.52	61.84	269.03	77.25	1.12441	52.9281	47.0719
Gchfr	Gchfr-201	ENSMUSG00000046814|ENSMUST00000057454	21	57.705	58.44	559.99	1.12	42.42	14.2037	93.4227	6.57734
Gstt1	Gstt1-201	ENSMUSG00000001663|ENSMUST00000001713	203	57.6987	233.06	225.02	398.35	282.98	0.672332	40.2033	59.7967
Hsd17b10	Hsd17b10-201	ENSMUSG00000025260|ENSMUST00000026289	139	57.6767	127.14	166.11	1.12	11.22	23.7642	95.9619	4.03809
C8a	C8a-203	ENSMUSG00000035031|ENSMUST00000106808	7	57.661	929.65	530.22	55.02	17.54	20.1195	95.265	4.73496
Pah	Pah-201	ENSMUSG00000020051|ENSMUST00000020241	114	57.6286	1236.01	861.47	817.32	1319.73	0.981484	49.5328	50.4672
Cyp2d9	Cyp2d9-201	ENSMUSG00000068086|ENSMUST00000089129	485	57.605	1284.62	416.64	558.24	134.32	2.45648	71.0688	28.9312
Hadhb	Hadhb-203	ENSMUSG00000059447|ENSMUST00000114786	373	57.5895	56.58	169.23	443.05	119.15	0.401654	28.6557	71.3443
Srsf5	Srsf5-201	ENSMUSG00000021134|ENSMUST00000094693	32	57.5867	227.73	191.4	11.21	30.83	9.96979	90.8841	9.11594
Cpt1a	Cpt1a-201	ENSMUSG00000024900|ENSMUST00000025835	606	57.5701	368.67	245.42	31.07	37.03	9.01747	90.0174	9.98256
Hdlbp	Hdlbp-202	ENSMUSG00000034088|ENSMUST00000170883	778	57.5186	12.49	24.01	197.74	268.65	0.0782607	7.25805	92.742
Ndufs3	Ndufs3-201	ENSMUSG00000005510|ENSMUST00000005647	236	57.5147	417.18	82.56	22.2	84.32	4.69151	82.43	17.57
Tmem135	Tmem135-201	ENSMUSG00000039428|ENSMUST00000041968	145	57.4321	114.54	105.41	30.59	24.36	4.00273	80.0109	19.9891
Surf4	Surf4-201	ENSMUSG00000014867|ENSMUST00000015011	149	57.4286	7.71	72.46	181.38	829.03	0.079344	7.35113	92.6489
Cpt2	Cpt2-201	ENSMUSG00000028607|ENSMUST00000030345	526	57.4117	0	200.08	16.02	184.78	0.996414	49.9102	50.0898
Eno1	Eno1-202	ENSMUSG00000063524|ENSMUST00000080926	257	57.3999	48.36	114.41	583.03	2034.1	0.0621941	5.85525	94.1448
Id3	Id3-201	ENSMUSG00000007872|ENSMUST00000008016	79	57.3608	235.3	275.82	182.38	165.03	1.47123	59.5343	40.4657
Eef1a1	Eef1a1-201	ENSMUSG00000037742|ENSMUST00000042235	384	57.3486	1013.81	830.77	3404.95	2727.51	0.30079	23.1236	76.8764
Ldha	Ldha-210	ENSMUSG00000063229|ENSMUST00000209984	121	57.3347	54.26	92.28	737.98	2432.19	0.0462247	4.41823	95.5818
Rpl36al	Rpl36al-201	ENSMUSG00000049751|ENSMUST00000054544	37	57.3345	255.19	335.78	479.2	993.93	0.401166	28.6309	71.3691
Pcx	Pcx-201	ENSMUSG00000024892|ENSMUST00000068004	910	57.2839	92.98	394.68	45.28	131.16	2.76389	73.4317	26.5683
Mttp	Mttp-201	ENSMUSG00000028158|ENSMUST00000029805	656	57.2571	393.98	343.04	93.33	116.29	3.51598	77.8564	22.1436
Ass1	Ass1-201	ENSMUSG00000076441|ENSMUST00000102840	205	57.246	3300.91	4075.28	3599.94	1500.59	1.44616	59.1196	40.8804
Cope	Cope-201	ENSMUSG00000055681|ENSMUST00000066469	230	57.1793	42.68	84.28	303.29	142.92	0.28453	22.1505	77.8495
Eif5	Eif5-202	ENSMUSG00000021282|ENSMUST00000166123	176	57.099	46.94	14.72	151.6	122.83	0.224684	18.3463	81.6537
Fn1	Fn1-214	ENSMUSG00000026193|ENSMUST00000188894	430	57.0833	401.15	784.32	87.43	199.7	4.12869	80.5018	19.4982
Rpl15	Rpl15-202	ENSMUSG00000012405|ENSMUST00000080281	146	57.0729	26.85	39.71	368.06	553.05	0.0722606	6.73909	93.2609
Gne	Gne-201	ENSMUSG00000028479|ENSMUST00000030201	469	57.0348	1.12	18.59	98.8	199.86	0.0659948	6.19091	93.8091
Aldh1a7	Aldh1a7-201	ENSMUSG00000024747|ENSMUST00000025656	402	57.0226	97.98	44.16	58.28	106.59	0.862134	46.2982	53.7018
Ugt2b36	Ugt2b36-201	ENSMUSG00000070704|ENSMUST00000094649	21	57.0089	292.62	1561.53	188.66	443.8	2.93165	74.5654	25.4346
Sc5d	Sc5d-201	ENSMUSG00000032018|ENSMUST00000052725	281	56.9974	262.14	793.27	327.3	266.82	1.77643	63.9825	36.0175
Actr2	Actr2-201	ENSMUSG00000020152|ENSMUST00000000137	58	56.9201	6.94	32.04	262.1	190.96	0.0860372	7.92212	92.0779
F5	F5-201	ENSMUSG00000026579|ENSMUST00000086040	15	56.9088	346.77	83.49	147.56	40.78	2.28449	69.5538	30.4462
Psmd11	Psmd11-214	ENSMUSG00000017428|ENSMUST00000173938	371	56.8819	133.09	180.43	36.44	47.24	3.74665	78.9325	21.0675
Aldh7a1	Aldh7a1-208	ENSMUSG00000053644|ENSMUST00000174518	342	56.8753	259.36	301.68	281.51	712.17	0.564608	36.0862	63.9138
Erg28	Erg28-201	ENSMUSG00000021252|ENSMUST00000021676	28	56.8372	152.37	168.04	0	0	#DIV/0!	100	0
Tars	Tars-207	ENSMUSG00000022241|ENSMUST00000228814	1	56.8277	52.02	67.08	36.55	144.25	0.658739	39.7132	60.2868
Akr1c6	Akr1c6-201	ENSMUSG00000021210|ENSMUST00000021630	321	56.7674	2096.97	1057.85	2469.6	812.45	0.961235	49.0117	50.9883
Decr1	Decr1-201	ENSMUSG00000028223|ENSMUST00000029877	312	56.7632	130.15	450.99	78.29	26.75	5.53256	84.6921	15.3079
Suclg2	Suclg2-204	ENSMUSG00000061838|ENSMUST00000204224	297	56.6798	371.12	286.74	11.22	10.2	30.7124	96.8467	3.15334
Itih4	Itih4-203	ENSMUSG00000021922|ENSMUST00000120269	647	56.6755	339.58	384.23	1647.76	993.74	0.274015	21.508	78.492
Vcp	Vcp-201	ENSMUSG00000028452|ENSMUST00000030164	379	56.6694	737.86	168.12	4.7	11.76	55.0413	98.2156	1.7844
Ifi27	Ifi27-205	ENSMUSG00000064215|ENSMUST00000085065	32	56.6569	95.51	29.64	231.24	123.92	0.352376	26.0561	73.9439
Gstt2	Gstt2-208	ENSMUSG00000033318|ENSMUST00000220440	181	56.6478	121.73	33.06	69.3	51.53	1.28106	56.1607	43.8393
Cyp2c68	Cyp2c68-201	ENSMUSG00000074882|ENSMUST00000099472	437	56.6465	26.31	25.31	275.31	53.06	0.157201	13.5846	86.4154
Adi1	Adi1-201	ENSMUSG00000020629|ENSMUST00000020957	139	56.6215	201.71	175.69	216.59	292.71	0.741017	42.5623	57.4377
Vdac3	Vdac3-202	ENSMUSG00000008892|ENSMUST00000179233	255	56.5857	24.1	33.47	64.73	352.8	0.137882	12.1174	87.8826
Steap4	Steap4-201	ENSMUSG00000012428|ENSMUST00000115421	125	56.5339	15.41	198.9	30.32	115.86	1.46607	59.4496	40.5504
Copa	Copa-206	ENSMUSG00000026553|ENSMUST00000135192	262	56.4807	63.1	67.62	0	0	#DIV/0!	100	0
Pcbp1	Pcbp1-201	ENSMUSG00000051695|ENSMUST00000053015	176	56.4259	33.63	128.08	478.2	225.78	0.229708	18.6799	81.3201
Lman2	Lman2-201	ENSMUSG00000021484|ENSMUST00000021940	78	56.3872	16.96	121.02	36.13	273.65	0.445413	30.8156	69.1844
Ndufb5	Ndufb5-204	ENSMUSG00000027673|ENSMUST00000127477	115	56.3825	229.29	124.6	63.1	83.38	2.41596	70.7257	29.2743
Slc25a15	Slc25a15-201	ENSMUSG00000031482|ENSMUST00000033871	138	56.3328	217.48	129.78	391.29	85.65	0.7281	42.133	57.867
Mrps28	Mrps28-201	ENSMUSG00000040269|ENSMUST00000042148	117	56.3035	41.14	237.78	1.12	2.24	83.0119	98.8097	1.19031
Tsku	Tsku-201	ENSMUSG00000049580|ENSMUST00000094161	29	56.2547	207.9	89.61	132.9	21.11	1.93176	65.8908	34.1092
Rpl13	Rpl13-201	ENSMUSG00000000740|ENSMUST00000000756	193	56.249	259.87	300.38	9.5	19.9	19.0561	95.014	4.98601
Elovl3	Elovl3-201	ENSMUSG00000038754|ENSMUST00000043739	52	56.1956	151.25	354.8	513.32	1080.55	0.317498	24.0985	75.9015
Hsd11b1	Hsd11b1-201	ENSMUSG00000016194|ENSMUST00000016338	24	56.1502	263.37	220.74	1230.74	1159.66	0.202523	16.8415	83.1585
Pgk1	Pgk1-201	ENSMUSG00000062070|ENSMUST00000081593	210	56.0752	642.84	739.06	69.63	70.6	9.85452	90.7873	9.21275
Aldh3a2	Aldh3a2-202	ENSMUSG00000010025|ENSMUST00000074127	275	56.045	69.07	92.92	103.54	194.39	0.543718	35.2213	64.7787
Sdhc	Sdhc-202	ENSMUSG00000058076|ENSMUST00000111336	116	55.9743	761.26	230.64	339.61	131.24	2.10662	67.8106	32.1894
Echdc1	Echdc1-201	ENSMUSG00000019883|ENSMUST00000020034	80	55.9702	107.5	65.15	49.87	102.9	1.13013	53.0545	46.9455
Hint1	Hint1-201	ENSMUSG00000020267|ENSMUST00000020504	123	55.9536	909.49	857.76	28.11	77.03	16.8085	94.3847	5.61528
Hal	Hal-202	ENSMUSG00000020017|ENSMUST00000129421	204	55.9528	34.48	397.26	38.01	352.94	1.10434	52.4791	47.5209
Psma2	Psma2-201	ENSMUSG00000015671|ENSMUST00000170836	164	55.9513	14.85	67.5	215.72	247.92	0.177616	15.0827	84.9173
Dnase1l3	Dnase1l3-201	ENSMUSG00000025279|ENSMUST00000026315	64	55.9392	36.65	117.04	11.16	153.29	0.93457	48.3089	51.6911
Pgk1	Pgk1-201	ENSMUSG00000062070|ENSMUST00000081593	55	55.9348	775.92	380.09	314.36	172.5	2.37442	70.3653	29.6347
Rps15	Rps15-201	ENSMUSG00000063457|ENSMUST00000062674	64	55.8935	480.59	279.05	11.32	5.82	44.3197	97.7935	2.20654
Cpn2	Cpn2-201	ENSMUSG00000023176|ENSMUST00000064856	347	55.8889	136.27	627.65	45.55	34.38	9.55736	90.5279	9.47206
Cpn1	Cpn1-201	ENSMUSG00000025196|ENSMUST00000026210	79	55.8563	244.38	104	107	9.24	2.99708	74.9817	25.0183
Ddx3x	Ddx3x-201	ENSMUSG00000000787|ENSMUST00000000804	22	55.8173	158.78	194.76	17.77	63.77	4.33579	81.2586	18.7414
Ivd	Ivd-201	ENSMUSG00000027332|ENSMUST00000028807	181	55.7897	23.39	41.32	285.21	200.09	0.13334	11.7652	88.2348
Cat	Cat-201	ENSMUSG00000027187|ENSMUST00000028610	498	55.7184	151.67	129.39	5117.06	4956.82	0.0278999	2.71426	97.2857
Rps9	Rps9-201	ENSMUSG00000006333|ENSMUST00000006496	85	55.7127	404.89	259.3	27.82	39.4	9.88084	90.8095	9.19047
Rac1	Rac1-201	ENSMUSG00000001847|ENSMUST00000080537	122	55.6533	92.99	367.86	108.32	286.3	1.16783	53.871	46.129
Serpina3m	Serpina3m-202	ENSMUSG00000079012|ENSMUST00000168797	15	55.5405	256.31	427.28	40.07	66.49	6.41507	86.514	13.486
Cfl1	Cfl1-202	ENSMUSG00000056201|ENSMUST00000209469	52	55.5225	461.3	411.03	280.56	167.86	1.94534	66.0481	33.9519
Hoga1	Hoga1-201	ENSMUSG00000025176|ENSMUST00000081714	200	55.5222	39.53	225.59	27.89	16.83	5.92844	85.5667	14.4333
Gcdh	Gcdh-201	ENSMUSG00000003809|ENSMUST00000003907	180	55.5169	700.48	305.08	86.25	106.33	5.22152	83.9268	16.0732
Rab10	Rab10-201	ENSMUSG00000020671|ENSMUST00000021001	21	55.5088	1.78	28.29	55.99	423.47	0.0627164	5.90152	94.0985
Ces2e	Ces2e-201	ENSMUSG00000031886|ENSMUST00000034355	412	55.453	12.62	88.35	61.66	459.08	0.193897	16.2407	83.7593
Por	Por-201	ENSMUSG00000005514|ENSMUST00000005651	175	55.4503	309.29	161.34	26.17	143.09	2.78052	73.5486	26.4514
Ndufs1	Ndufs1-201	ENSMUSG00000025968|ENSMUST00000027111	260	55.4054	21.31	47.41	74.88	141.06	0.318237	24.1411	75.8589
Amdhd1	Amdhd1-201	ENSMUSG00000015890|ENSMUST00000016034	222	55.3879	57.29	268.32	63.26	255.88	1.02027	50.5017	49.4983
37500	Sept2-201	ENSMUSG00000026276|ENSMUST00000027495	224	55.3838	92.16	20.97	109.32	44.02	0.737772	42.4551	57.5449
Shmt1	Shmt1-201	ENSMUSG00000020534|ENSMUST00000018744	188	55.3811	441.89	39.18	12.67	51.53	7.4933	88.226	11.774
Ppp2ca	Ppp2ca-201	ENSMUSG00000020349|ENSMUST00000020608	223	55.3303	137.17	209.82	29.08	67.98	3.57501	78.1421	21.8579
Ces3b	Ces3b-202	ENSMUSG00000062181|ENSMUST00000093221	31	55.3211	305.55	386.46	59.46	458.8	1.33526	57.1782	42.8218
Itih4	Itih4-203	ENSMUSG00000021922|ENSMUST00000120269	548	55.2825	1835.53	705.55	397.69	165.37	4.51298	81.861	18.139
Ctsd	Ctsd-202	ENSMUSG00000007891|ENSMUST00000151120	225	55.2632	335.21	45.96	484.7	85.4	0.668602	40.0696	59.9304
Got2	Got2-201	ENSMUSG00000031672|ENSMUST00000034097	379	55.2057	382.02	273.61	552.25	625.19	0.556827	35.7668	64.2332
Fmo1	Fmo1-201	ENSMUSG00000040181|ENSMUST00000046049	84	55.1972	231.23	237.52	59.18	69.75	3.63569	78.4283	21.5717
Phb	Phb-204	ENSMUSG00000038845|ENSMUST00000125172	70	55.0739	131.05	152.25	133.45	68.13	1.4054	58.4268	41.5732
Degs1	Degs1-201	ENSMUSG00000038633|ENSMUST00000035295	166	55.0717	80.8	57.92	2.45	112.75	1.20417	54.6314	45.3686
Rpl6	Rpl6-201	ENSMUSG00000029614|ENSMUST00000031617	188	55.0505	308.67	110.5	189.22	47.77	1.76872	63.8823	36.1177
Rhoa	Rhoa-201	ENSMUSG00000007815|ENSMUST00000007959	99	55.0427	245.48	238.57	145.98	80.41	2.13812	68.1338	31.8662
Rab10	Rab10-201	ENSMUSG00000020671|ENSMUST00000021001	43	55.0321	189.83	212.28	33.37	30.76	6.27023	86.2453	13.7547
Ndufa10	Ndufa10-201	ENSMUSG00000026260|ENSMUST00000027478	47	55.0297	286.68	224.12	19.03	22.32	12.3531	92.5111	7.48891
Alas1	Alas1-202	ENSMUSG00000032786|ENSMUST00000112524	65	55.0006	701.26	208.71	247.66	48.33	3.07433	75.4561	24.5439
Gm4952	Gm4952-201	ENSMUSG00000071633|ENSMUST00000092931	113	54.8896	116.31	162.35	55.78	112.03	1.66057	62.414	37.586
Rpl28	Rpl28-202	ENSMUSG00000030432|ENSMUST00000078432	29	54.8801	218.84	71.48	345.39	76.88	0.687522	40.7415	59.2585
Hdlbp	Hdlbp-202	ENSMUSG00000034088|ENSMUST00000170883	623	54.8676	180.88	201.09	9.95	5.82	24.2213	96.0351	3.9649
Sept2	Sept2-201	ENSMUSG00000026276|ENSMUST00000027495	72	54.8571	124.63	102.77	27.99	4.43	7.01419	87.5221	12.4779
Elob	Elob-201	ENSMUSG00000055839|ENSMUST00000069579	109	54.856	555.78	370.2	94.17	54.1	6.24523	86.1978	13.8022
Cox7b	Cox7b-201	ENSMUSG00000031231|ENSMUST00000033582	34	54.8143	153.6	95.02	711.01	620.52	0.186718	15.7339	84.2661
Anpep	Anpep-202	ENSMUSG00000039062|ENSMUST00000107392	362	54.8075	8.26	184.01	21.85	56.26	2.46153	71.111	28.889
Hebp1	Hebp1-201	ENSMUSG00000042770|ENSMUST00000045855	164	54.7421	632.46	139.48	169.28	243.78	1.86883	65.1426	34.8574
Txndc17	Txndc17-201	ENSMUSG00000020803|ENSMUST00000021158	82	54.689	27.42	3.37	112.96	154	0.115336	10.3409	89.6591
Acsf2	Acsf2-201	ENSMUSG00000076435|ENSMUST00000103164	230	54.6332	31.27	20.72	458.98	116.81	0.0902933	8.28156	91.7184
Tmx2	Tmx2-203	ENSMUSG00000050043|ENSMUST00000111665	56	54.6026	103.2	102.72	41.8	57.76	2.0683	67.4087	32.5913
Ebp	Ebp-201	ENSMUSG00000031168|ENSMUST00000033509	107	54.6007	162.08	340.91	388.35	501.82	0.565049	36.1043	63.8957
Acly	Acly-203	ENSMUSG00000020917|ENSMUST00000107389	668	54.5805	130.62	320.55	18.61	18.43	12.1806	92.4131	7.5869
Cct7	Cct7-201	ENSMUSG00000030007|ENSMUST00000032078	18	54.5604	20.74	290.84	0	6.03	51.6716	98.1014	1.89855
Mup3	Mup3-202	ENSMUSG00000066154|ENSMUST00000107472	52	54.539	27689.8	11910.8	2040.79	534.18	15.3791	93.8946	6.10535
Rpl21	Rpl21-202	ENSMUSG00000041453|ENSMUST00000075453	118	54.5319	375.92	37.63	59.68	21.37	5.10241	83.613	16.387
Cyp3a13	Cyp3a13-201	ENSMUSG00000029727|ENSMUST00000031741	134	54.477	140.35	66.11	363.05	64.38	0.483026	32.5703	67.4297
Dad1	Dad1-201	ENSMUSG00000022174|ENSMUST00000022781	83	54.4527	300.93	231.11	22.1	61.5	6.36411	86.4206	13.5794
Ndufa9	Ndufa9-203	ENSMUSG00000000399|ENSMUST00000205002	187	54.4264	187.59	183.15	22.29	18.26	9.14279	90.1408	9.85922
Ang	Ang-201	ENSMUSG00000072115|ENSMUST00000069011	26	54.4108	426.59	290.77	193.01	144.6	2.12482	67.9981	32.0019
Proz	Proz-201	ENSMUSG00000031445|ENSMUST00000033822	34	54.3709	247.33	243.18	13.66	29.53	11.357	91.9074	8.09256
Ptbp1	Ptbp1-206	ENSMUSG00000006498|ENSMUST00000165704	343	54.3697	184.03	74.96	20.41	14.58	7.40183	88.0978	11.9022
Glyat	Glyat-201	ENSMUSG00000063683|ENSMUST00000044976	151	54.3129	749.39	349.97	206.49	253.4	2.39048	70.5057	29.4943
Prdx3	Prdx3-201	ENSMUSG00000024997|ENSMUST00000025961	174	54.2855	76.44	25.4	218.24	228.81	0.227804	18.5538	81.4462
Lrp1	Lrp1-201	ENSMUSG00000040249|ENSMUST00000049149	2140	54.2743	207.93	135.64	23.64	20.4	7.80132	88.6381	11.3619
Echdc2	Echdc2-201	ENSMUSG00000028601|ENSMUST00000052999	176	54.2387	2.24	268.33	0	10.7	25.2869	96.1958	3.80417
Abcb11	Abcb11-202	ENSMUSG00000027048|ENSMUST00000102710	109	54.2284	207.18	360.62	11.21	4.03	37.2572	97.3861	2.61389
Rps9	Rps9-201	ENSMUSG00000006333|ENSMUST00000006496	162	54.2156	155.97	52.92	284.98	216.99	0.41614	29.3855	70.6145
Galm	Galm-201	ENSMUSG00000035473|ENSMUST00000039205	270	54.1972	76.11	73.21	113.67	15.13	1.15932	53.6891	46.3109
Slc25a20	Slc25a20-201	ENSMUSG00000032602|ENSMUST00000035222	250	54.1494	102.65	47.69	141.01	176.62	0.473318	32.126	67.874
Agxt	Agxt-201	ENSMUSG00000026272|ENSMUST00000027491	335	54.0903	7.57	0	343.47	557.96	0.00839777	0.832783	99.1672
Id3	Id3-201	ENSMUSG00000007872|ENSMUST00000008016	89	54.0869	47.66	51.64	427.34	279.63	0.140459	12.316	87.684
Cldn1	Cldn1-201	ENSMUSG00000022512|ENSMUST00000023154	37	54.0415	113.16	34.59	208.04	22.85	0.639915	39.0212	60.9788
Ebp	Ebp-201	ENSMUSG00000031168|ENSMUST00000033509	111	54.0326	456.64	321.23	344.38	211.98	1.39814	58.301	41.699
Ufm1	Ufm1-203	ENSMUSG00000027746|ENSMUST00000146598	48	54.0057	43.92	66.81	82.07	82.06	0.674648	40.286	59.714
Clpx	Clpx-201	ENSMUSG00000015357|ENSMUST00000015501	205	53.9846	21.14	80.63	27.93	336.22	0.279473	21.8428	78.1572
Uba1	Uba1-201	ENSMUSG00000001924|ENSMUST00000001989	540	53.9787	2.24	13.71	49.07	243.09	0.0545934	5.17672	94.8233
Gpam	Gpam-201	ENSMUSG00000024978|ENSMUST00000061856	820	53.9774	62.67	152.6	31.06	60.12	2.36093	70.2464	29.7536
Pdia6	Pdia6-201	ENSMUSG00000020571|ENSMUST00000057288	44	53.9232	344.75	224.46	356.78	130.07	1.16917	53.8994	46.1006
Bbox1	Bbox1-201	ENSMUSG00000041660|ENSMUST00000046233	377	53.8902	88.92	132.89	136.31	289.09	0.521415	34.2717	65.7283
Serpina1a	Serpina1a-201	ENSMUSG00000066366|ENSMUST00000072876	270	53.832	294.26	599.7	255.05	666.88	0.969661	49.2299	50.7701
Sec61b	Sec61b-201	ENSMUSG00000053317|ENSMUST00000065678	91	53.8289	89.48	44.73	623.14	80.85	0.190642	16.0117	83.9883
Gdi2	Gdi2-209	ENSMUSG00000021218|ENSMUST00000223396	302	53.8274	296.5	406.03	35.19	36.68	9.77501	90.7193	9.28073
Akr1c6	Akr1c6-201	ENSMUSG00000021210|ENSMUST00000021630	308	53.8274	180.33	166.96	2171.46	3744.56	0.0587033	5.54483	94.4552
Adh5	Adh5-201	ENSMUSG00000028138|ENSMUST00000005964	175	53.8242	273.3	276.34	802.58	356.65	0.474142	32.1639	67.8361
Hsd17b6	Hsd17b6-203	ENSMUSG00000025396|ENSMUST00000219447	19	53.789	55.88	47.84	26.31	165.17	0.541675	35.1355	64.8645
Rab14	Rab14-202	ENSMUSG00000026878|ENSMUST00000113025	129	53.774	92.84	111.03	198.52	157.64	0.572411	36.4034	63.5966
Sdhc	Sdhc-202	ENSMUSG00000058076|ENSMUST00000111336	75	53.7719	451.06	633.33	256.49	62.19	3.40276	77.2869	22.7131
Rps19	Rps19-203	ENSMUSG00000040952|ENSMUST00000108430	79	53.6269	335.44	79.27	23.07	21.29	9.34874	90.337	9.66301
Hp	Hp-201	ENSMUSG00000031722|ENSMUST00000074898	118	53.6259	9494.11	1465.56	748.95	441.46	9.20663	90.2025	9.79755
Dpys	Dpys-202	ENSMUSG00000022304|ENSMUST00000110306	193	53.591	108.18	380.22	17.97	98.95	4.17722	80.6846	19.3154
Adk	Adk-201	ENSMUSG00000039197|ENSMUST00000045376	312	53.5881	859.63	784.18	454.38	806.82	1.30337	56.5853	43.4147
Sdc2	Sdc2-201	ENSMUSG00000022261|ENSMUST00000022871	27	53.5394	79.06	400.72	253.02	563.67	0.587469	37.0066	62.9934
Cct2	Cct2-201	ENSMUSG00000034024|ENSMUST00000047672	492	53.5055	132.49	152.14	0	1.12	254.134	99.608	0.391951
Tomm6	Tomm6-202	ENSMUSG00000033475|ENSMUST00000113302	50	53.4975	759.22	408.19	128.8	45.56	6.6954	87.0052	12.9948
Txndc17	Txndc17-201	ENSMUSG00000020803|ENSMUST00000021158	72	53.4939	32.66	212.85	11.33	29.89	5.95609	85.6241	14.3759
Masp1	Masp1-201	ENSMUSG00000022887|ENSMUST00000089883	310	53.4772	37.52	80.34	41.27	152.56	0.608059	37.8132	62.1868
Ywhab	Ywhab-201	ENSMUSG00000018326|ENSMUST00000018470	114	53.4164	133	50.75	199	141.97	0.538904	35.0187	64.9813
Cyp2c37	Cyp2c37-201	ENSMUSG00000042248|ENSMUST00000049178	203	53.4098	134.48	113.29	23.56	3.96	9.00327	90.0033	9.99673
Sord	Sord-201	ENSMUSG00000027227|ENSMUST00000110551	304	53.3969	1366.15	1575.87	1013.57	1344.59	1.24759	55.5079	44.4921
Aldh7a1	Aldh7a1-208	ENSMUSG00000053644|ENSMUST00000174518	332	53.3718	815.84	263.3	177.91	149.8	3.29297	76.7061	23.2939
Gclc	Gclc-201	ENSMUSG00000032350|ENSMUST00000034905	489	53.3589	201.58	218.69	24.16	42.38	6.31605	86.3314	13.6686
Dnajb9	Dnajb9-201	ENSMUSG00000014905|ENSMUST00000015049	29	53.3143	185.4	160.14	5.6	0	61.7036	98.4052	1.59481
Gapdh	Gapdh-203	ENSMUSG00000057666|ENSMUST00000118875	197	53.3113	135.13	87.37	843.7	619.95	0.152017	13.1957	86.8043
Gpc4	Gpc4-201	ENSMUSG00000031119|ENSMUST00000033450	51	53.2927	66.88	143.56	70.59	58.57	1.6293	61.967	38.033
Rdh11	Rdh11-203	ENSMUSG00000066441|ENSMUST00000161204	295	53.2879	65.89	154.66	43.98	40.61	2.60728	72.2783	27.7217
Dcxr	Dcxr-202	ENSMUSG00000039450|ENSMUST00000106148	90	53.284	149.89	166.14	2.35	3.47	54.3007	98.1917	1.8083
Gpc4	Gpc4-201	ENSMUSG00000031119|ENSMUST00000033450	228	53.2763	125.66	144.79	31.39	33.31	4.18006	80.6952	19.3048
Rpl14	Rpl14-201	ENSMUSG00000025794|ENSMUST00000165532	18	53.2092	251.73	193.65	31.54	0	14.1211	93.3867	6.61327
Tmx2	Tmx2-203	ENSMUSG00000050043|ENSMUST00000111665	48	53.2065	106.72	85.72	20.23	21.69	4.59065	82.113	17.887
Rpl14	Rpl14-201	ENSMUSG00000025794|ENSMUST00000165532	115	53.1811	135.55	145.56	131.02	68.17	1.41127	58.528	41.472
St13	St13-205	ENSMUSG00000022403|ENSMUST00000172107	175	53.1458	308.59	142.56	144.26	45.39	2.37886	70.4042	29.5958
Eif3i	Eif3i-201	ENSMUSG00000028798|ENSMUST00000102593	18	53.144	112.73	158.09	32.66	57.35	3.00878	75.0547	24.9453
Ube2h	Ube2h-202	ENSMUSG00000039159|ENSMUST00000102993	100	53.1378	22.89	20.7	137.24	85.93	0.195322	16.3405	83.6595
Cd82	Cd82-201	ENSMUSG00000027215|ENSMUST00000028644	41	53.1324	13.23	70.87	145.6	56.58	0.415966	29.3768	70.6232
Rps8	Rps8-201	ENSMUSG00000047675|ENSMUST00000102696	88	53.1054	49.79	77.29	316.29	281.92	0.212434	17.5213	82.4787
Elovl3	Elovl3-201	ENSMUSG00000038754|ENSMUST00000043739	138	53.0681	934.36	806.18	241.7	130.13	4.68101	82.3975	17.6025
Wdr83os	Wdr83os-201	ENSMUSG00000059355|ENSMUST00000079764	98	53.0679	28.37	256.21	25.93	200.69	1.25576	55.669	44.331
Snap47	Snap47-201	ENSMUSG00000009894|ENSMUST00000010038	339	53.0568	165.88	88.9	16.95	40.29	4.45108	81.655	18.345
Baat	Baat-201	ENSMUSG00000039653|ENSMUST00000043056	325	53.0431	330.6	424.88	32.66	42.59	10.0396	90.9417	9.0583
Acly	Acly-203	ENSMUSG00000020917|ENSMUST00000107389	932	53.0371	254.25	233.6	2.24	4.43	73.1409	98.6512	1.34878
Kyat1	Kyat1-201	ENSMUSG00000039648|ENSMUST00000044038	420	53.0103	46.8	41.11	169.86	22	0.458199	31.4222	68.5778
Eif4g1	Eif4g1-201	ENSMUSG00000045983|ENSMUST00000044783	849	52.979	22.37	23.2	110.99	122.19	0.195428	16.348	83.652
Shmt1	Shmt1-201	ENSMUSG00000020534|ENSMUST00000018744	277	52.9747	62.07	73.04	197.27	210.33	0.331477	24.8954	75.1046
Ndufv2	Ndufv2-203	ENSMUSG00000024099|ENSMUST00000143987	25	52.9573	321.08	127.44	43.83	36.68	5.57098	84.7816	15.2184
Aldh1b1	Aldh1b1-201	ENSMUSG00000035561|ENSMUST00000044384	421	52.9463	26.91	111.61	23.16	93.06	1.19188	54.377	45.623
Pcyt2	Pcyt2-201	ENSMUSG00000025137|ENSMUST00000026129	312	52.9047	217.68	51.67	135.28	29.93	1.63035	61.9822	38.0178
Actb	Actb-201	ENSMUSG00000029580|ENSMUST00000100497	308	52.8928	1326.39	1640.59	560.35	1353.92	1.54993	60.7832	39.2168
Lipa	Lipa-201	ENSMUSG00000024781|ENSMUST00000049572	342	52.8841	133.05	22.75	72.85	6.88	1.9541	66.1487	33.8513
Pid1	Pid1-201	ENSMUSG00000045658|ENSMUST00000168574	156	52.773	0	0	96.61	200.14	0	0	100
Ddah1	Ddah1-201	ENSMUSG00000028194|ENSMUST00000029845	213	52.7476	30.91	134.71	15.35	130.97	1.1319	53.0935	46.9065
Sar1b	Sar1b-201	ENSMUSG00000020386|ENSMUST00000020653	1	52.7103	428.97	367.67	150.21	130.76	2.83532	73.9266	26.0734
Acp1	Acp1-201	ENSMUSG00000044573|ENSMUST00000062740	59	52.6557	10.75	3.37	3.58	259.35	0.0537025	5.09655	94.9034
Sardh	Sardh-202	ENSMUSG00000009614|ENSMUST00000102886	480	52.643	183.39	335.56	219.74	163.85	1.35288	57.4988	42.5012
Cyp2j5	Cyp2j5-201	ENSMUSG00000052520|ENSMUST00000030299	45	52.6116	190.18	754.91	59.51	562.77	1.51875	60.2978	39.7022
Acsf2	Acsf2-201	ENSMUSG00000076435|ENSMUST00000103164	211	52.5944	202.54	362.27	4.99	29.57	16.3429	94.2339	5.76605
Rpl6	Rpl6-201	ENSMUSG00000029614|ENSMUST00000031617	108	52.554	62.22	70.75	224.84	324.61	0.242006	19.4851	80.5149
Slc1a2	Slc1a2-202	ENSMUSG00000005089|ENSMUST00000080210	556	52.5288	83.14	5.68	277.91	12.93	0.305391	23.3946	76.6054
Cnih1	Cnih1-201	ENSMUSG00000015759|ENSMUST00000015903	38	52.4741	160.53	64.39	40.09	56.62	2.32572	69.9313	30.0687
Ugt2b5	Ugt2b5-201	ENSMUSG00000054630|ENSMUST00000067790	393	52.4676	792.88	493.21	115.66	23.72	9.22722	90.2222	9.77783
Uqcrb	Uqcrb-201	ENSMUSG00000021520|ENSMUST00000021993	25	52.4298	76.01	76.72	1057.37	42.73	0.138833	12.1908	87.8092
Rdh11	Rdh11-203	ENSMUSG00000066441|ENSMUST00000161204	51	52.4108	10.15	6.13	222.06	72.9	0.0551939	5.23069	94.7693
Rps14	Rps14-203	ENSMUSG00000024608|ENSMUST00000122279	110	52.2818	524.54	110.18	110.48	61.36	3.69367	78.6947	21.3053
Saa1	Saa1-201	ENSMUSG00000074115|ENSMUST00000128088	51	52.2508	25.03	70.77	85.58	150.82	0.405245	28.838	71.162
Vdac3	Vdac3-202	ENSMUSG00000008892|ENSMUST00000179233	226	52.2281	55.26	293.02	8.3	49.51	6.02456	85.7642	14.2358
Gabarap	Gabarap-201	ENSMUSG00000018567|ENSMUST00000018711	97	52.2153	211.43	287.11	858.67	385.5	0.400701	28.6072	71.3928
Cox7a2	Cox7a2-201	ENSMUSG00000032330|ENSMUST00000034881	28	52.1101	756.41	1064.82	320.86	226.5	3.3273	76.8909	23.1091
F5	F5-201	ENSMUSG00000026579|ENSMUST00000086040	1024	52.1043	48.86	94.36	187.79	264.18	0.316879	24.0629	75.9371
Tufm	Tufm-202	ENSMUSG00000073838|ENSMUST00000106392	429	52.0956	8.73	2.64	51.43	241.78	0.0387777	3.73301	96.267
Cfl1	Cfl1-202	ENSMUSG00000056201|ENSMUST00000209469	26	52.0929	660.98	297.07	139.73	152.16	3.28223	76.6477	23.3523
Eif2s2	Eif2s2-201	ENSMUSG00000074656|ENSMUST00000099173	27	52.0827	6.67	7.85	293.19	21.15	0.046192	4.41525	95.5847
Pdcd6	Pdcd6-201	ENSMUSG00000021576|ENSMUST00000022060	46	52.0735	149.42	60.13	42.01	5.25	4.43398	81.5973	18.4027
Upb1	Upb1-201	ENSMUSG00000033427|ENSMUST00000039925	31	52.0672	126.76	192.48	207.99	229.42	0.729842	42.1912	57.8088
Tfr2	Tfr2-207	ENSMUSG00000029716|ENSMUST00000198866	641	52.0506	11.21	30.62	524.64	181.51	0.0592367	5.5924	94.4076
Sult1d1	Sult1d1-201	ENSMUSG00000029273|ENSMUST00000113314	59	52.0397	42.57	209.68	18.43	106.3	2.02237	66.9134	33.0866
Cyp27a1	Cyp27a1-201	ENSMUSG00000026170|ENSMUST00000027356	24	52.0312	706.52	310.23	253.92	167.95	2.4101	70.6754	29.3246
Gstt1	Gstt1-201	ENSMUSG00000001663|ENSMUST00000001713	18	51.986	49.79	50.97	435.54	478.46	0.110241	9.92944	90.0706
Rab1b	Rab1b-201	ENSMUSG00000024870|ENSMUST00000025804	144	51.977	1.12	60.66	14.97	305.79	0.192605	16.1499	83.8501
Urah	Urah-202	ENSMUSG00000025481|ENSMUST00000106050	89	51.919	497.69	1199.29	119.43	193.25	5.42721	84.4411	15.5589
Aspdh	Aspdh-201	ENSMUSG00000038704|ENSMUST00000035929	49	51.8885	12.03	71.95	134.05	105.2	0.351014	25.9815	74.0185
Cd164	Cd164-201	ENSMUSG00000019818|ENSMUST00000019962	75	51.8393	269.71	667.31	2.9	187.52	4.92081	83.1104	16.8896
Acadm	Acadm-201	ENSMUSG00000062908|ENSMUST00000072697	405	51.824	32.36	51.51	509	251.47	0.110287	9.9332	90.0668
Rab1a	Rab1a-201	ENSMUSG00000020149|ENSMUST00000020358	83	51.7871	335.87	181.46	62.65	16.59	6.52865	86.7174	13.2826
Echdc1	Echdc1-201	ENSMUSG00000019883|ENSMUST00000020034	133	51.6938	145.78	54.17	84.5	17.58	1.95876	66.202	33.798
Slc26a1	Slc26a1-201	ENSMUSG00000046959|ENSMUST00000051757	222	51.6921	144.3	79.49	42.23	69.28	2.00691	66.7432	33.2568
Herpud1	Herpud1-205	ENSMUSG00000031770|ENSMUST00000161576	322	51.664	274.25	466.73	231.75	49.4	2.63553	72.4937	27.5063
Gstm2	Gstm2-201	ENSMUSG00000040562|ENSMUST00000012348	145	51.6605	72.69	150.04	28.74	22.91	4.31229	81.1757	18.8243
Psma3	Psma3-202	ENSMUSG00000060073|ENSMUST00000160027	18	51.5007	14.96	2.64	563.33	160.04	0.0243306	2.37526	97.6247
Elob	Elob-201	ENSMUSG00000055839|ENSMUST00000069579	113	51.4982	315.66	176.39	192.33	218.89	1.19656	54.4743	45.5257
Car5a	Car5a-201	ENSMUSG00000025317|ENSMUST00000057653	158	51.4721	92.4	104.49	42.98	68.66	1.76362	63.8155	36.1845
Rgn	Rgn-201	ENSMUSG00000023070|ENSMUST00000023832	157	51.4649	439.41	144.9	3435.17	116.81	0.164503	14.1264	85.8736
Ugt2b34	Ugt2b34-201	ENSMUSG00000029260|ENSMUST00000031181	60	51.4234	126.33	92.52	590.54	752.04	0.163007	14.016	85.984
Aldh8a1	Aldh8a1-201	ENSMUSG00000037542|ENSMUST00000042699	380	51.4047	202.37	110.94	259.13	142.26	0.780563	43.838	56.162
Akr1c19	Akr1c19-202	ENSMUSG00000071551|ENSMUST00000118663	132	51.3956	141.11	167.59	113.05	37.09	2.05608	67.2784	32.7216
C4b	C4b-201	ENSMUSG00000073418|ENSMUST00000069507	48	51.3364	67.93	182.53	922.11	641.1	0.160222	13.8096	86.1904
[truncated: 3,934 more rows]

## Sheet: Supplemental Table S4
Supplemental Table S4: Enrichment analyses for top-200 genes from Supplementary Table S3
gProfiler_expressed_background
source	term_name	term_id	adjusted_p_value	negative_log10_of_adjusted_p_value	term_size	query_size	intersection_size	effective_domain_size	intersections
GO:MF (Molecular Function)	cofactor binding	GO:0048037	7.98e-17	16.0979	378	198	46	8625	ENSMUSG00000008540,ENSMUSG00000020051,ENSMUSG00000053279,ENSMUSG00000021751,ENSMUSG00000046949,ENSMUSG00000028603,ENSMUSG00000030869,ENSMUSG00000028011,ENSMUSG00000027597,ENSMUSG00000021957,ENSMUSG00000025745,ENSMUSG00000042248,ENSMUSG00000005803,ENSMUSG00000027187,ENSMUSG00000023019,ENSMUSG00000025153,ENSMUSG00000056035,ENSMUSG00000019232,ENSMUSG00000022477,ENSMUSG00000036892,ENSMUSG00000027261,…
GO:MF (Molecular Function)	oxidoreductase activity	GO:0016491	9.5e-17	16.0224	494	198	52	8625	ENSMUSG00000008540,ENSMUSG00000046598,ENSMUSG00000020051,ENSMUSG00000053279,ENSMUSG00000075705,ENSMUSG00000021751,ENSMUSG00000024747,ENSMUSG00000046949,ENSMUSG00000010025,ENSMUSG00000028011,ENSMUSG00000022853,ENSMUSG00000025745,ENSMUSG00000037542,ENSMUSG00000042248,ENSMUSG00000005803,ENSMUSG00000075706,ENSMUSG00000027195,ENSMUSG00000027187,ENSMUSG00000023019,ENSMUSG00000040466,ENSMUSG00000025153,…
GO:MF (Molecular Function)	coenzyme binding	GO:0050662	2.33e-12	11.6332	225	198	32	8625	ENSMUSG00000053279,ENSMUSG00000021751,ENSMUSG00000046949,ENSMUSG00000028603,ENSMUSG00000027597,ENSMUSG00000021957,ENSMUSG00000025745,ENSMUSG00000005803,ENSMUSG00000027187,ENSMUSG00000023019,ENSMUSG00000025153,ENSMUSG00000019232,ENSMUSG00000036892,ENSMUSG00000027261,ENSMUSG00000032047,ENSMUSG00000040181,ENSMUSG00000073481,ENSMUSG00000026385,ENSMUSG00000020182,ENSMUSG00000026003,ENSMUSG00000017950,…
GO:MF (Molecular Function)	catalytic activity	GO:0003824	5.86e-09	8.23222	3313	198	127	8625	ENSMUSG00000008540,ENSMUSG00000074768,ENSMUSG00000078675,ENSMUSG00000026526,ENSMUSG00000046598,ENSMUSG00000020051,ENSMUSG00000024158,ENSMUSG00000053279,ENSMUSG00000075705,ENSMUSG00000073555,ENSMUSG00000021751,ENSMUSG00000024747,ENSMUSG00000068749,ENSMUSG00000046949,ENSMUSG00000010025,ENSMUSG00000028603,ENSMUSG00000061825,ENSMUSG00000025651,ENSMUSG00000062480,ENSMUSG00000024587,ENSMUSG00000028479,…
GO:MF (Molecular Function)	oxidoreductase activity, acting on CH-OH group of donors	GO:0016614	0.0181512	1.7411	99	198	13	8625	ENSMUSG00000046598,ENSMUSG00000010025,ENSMUSG00000022853,ENSMUSG00000025745,ENSMUSG00000027195,ENSMUSG00000023019,ENSMUSG00000025153,ENSMUSG00000038092,ENSMUSG00000028692,ENSMUSG00000027261,ENSMUSG00000032418,ENSMUSG00000027984,ENSMUSG00000031613
GO:MF (Molecular Function)	acetyl-CoA C-acyltransferase activity	GO:0003988	0.0354467	1.45042	9	198	5	8625	ENSMUSG00000028603,ENSMUSG00000062480,ENSMUSG00000025745,ENSMUSG00000032047,ENSMUSG00000036880
GO:MF (Molecular Function)	small molecule binding	GO:0036094	0.0388036	1.41113	1492	198	62	8625	ENSMUSG00000078675,ENSMUSG00000020051,ENSMUSG00000053279,ENSMUSG00000073555,ENSMUSG00000021751,ENSMUSG00000073842,ENSMUSG00000046949,ENSMUSG00000028603,ENSMUSG00000024587,ENSMUSG00000028479,ENSMUSG00000026202,ENSMUSG00000028011,ENSMUSG00000027597,ENSMUSG00000026878,ENSMUSG00000021957,ENSMUSG00000036427,ENSMUSG00000025745,ENSMUSG00000005803,ENSMUSG00000027187,ENSMUSG00000023019,ENSMUSG00000025153,…
GO:BF (Biological Function)	oxidation-reduction process	GO:0055114	4.75e-29	28.3231	689	198	76	8625	ENSMUSG00000008540,ENSMUSG00000078675,ENSMUSG00000026526,ENSMUSG00000046598,ENSMUSG00000020051,ENSMUSG00000053279,ENSMUSG00000075705,ENSMUSG00000021751,ENSMUSG00000024747,ENSMUSG00000028648,ENSMUSG00000046949,ENSMUSG00000010025,ENSMUSG00000030869,ENSMUSG00000025651,ENSMUSG00000062480,ENSMUSG00000071014,ENSMUSG00000028011,ENSMUSG00000022853,ENSMUSG00000021957,ENSMUSG00000036427,ENSMUSG00000025745,…
GO:BF (Biological Function)	organic acid metabolic process	GO:0006082	9.24e-25	24.0344	645	198	69	8625	ENSMUSG00000074768,ENSMUSG00000026526,ENSMUSG00000020051,ENSMUSG00000024158,ENSMUSG00000053279,ENSMUSG00000021751,ENSMUSG00000010025,ENSMUSG00000030869,ENSMUSG00000062480,ENSMUSG00000024587,ENSMUSG00000028479,ENSMUSG00000028011,ENSMUSG00000022853,ENSMUSG00000058022,ENSMUSG00000027597,ENSMUSG00000036427,ENSMUSG00000025745,ENSMUSG00000037542,ENSMUSG00000042248,ENSMUSG00000027195,ENSMUSG00000041237,…
GO:BF (Biological Function)	oxoacid metabolic process	GO:0043436	8.57e-24	23.0669	627	198	67	8625	ENSMUSG00000074768,ENSMUSG00000026526,ENSMUSG00000020051,ENSMUSG00000024158,ENSMUSG00000053279,ENSMUSG00000021751,ENSMUSG00000010025,ENSMUSG00000030869,ENSMUSG00000062480,ENSMUSG00000024587,ENSMUSG00000028479,ENSMUSG00000028011,ENSMUSG00000022853,ENSMUSG00000058022,ENSMUSG00000027597,ENSMUSG00000036427,ENSMUSG00000025745,ENSMUSG00000037542,ENSMUSG00000042248,ENSMUSG00000027195,ENSMUSG00000041237,…
GO:BF (Biological Function)	carboxylic acid metabolic process	GO:0019752	9.77e-24	23.0103	608	198	66	8625	ENSMUSG00000074768,ENSMUSG00000026526,ENSMUSG00000020051,ENSMUSG00000024158,ENSMUSG00000053279,ENSMUSG00000021751,ENSMUSG00000010025,ENSMUSG00000030869,ENSMUSG00000062480,ENSMUSG00000024587,ENSMUSG00000028479,ENSMUSG00000028011,ENSMUSG00000022853,ENSMUSG00000058022,ENSMUSG00000027597,ENSMUSG00000036427,ENSMUSG00000025745,ENSMUSG00000037542,ENSMUSG00000042248,ENSMUSG00000027195,ENSMUSG00000041237,…
GO:BF (Biological Function)	small molecule metabolic process	GO:0044281	1.61e-18	17.7941	1095	198	80	8625	ENSMUSG00000074768,ENSMUSG00000078675,ENSMUSG00000026526,ENSMUSG00000020051,ENSMUSG00000024158,ENSMUSG00000053279,ENSMUSG00000021751,ENSMUSG00000024747,ENSMUSG00000010025,ENSMUSG00000028603,ENSMUSG00000030869,ENSMUSG00000062480,ENSMUSG00000024587,ENSMUSG00000028479,ENSMUSG00000028011,ENSMUSG00000022853,ENSMUSG00000058022,ENSMUSG00000027597,ENSMUSG00000036427,ENSMUSG00000025745,ENSMUSG00000037542,…
GO:BF (Biological Function)	small molecule catabolic process	GO:0044282	1.31e-14	13.8842	250	198	36	8625	ENSMUSG00000020051,ENSMUSG00000024158,ENSMUSG00000021751,ENSMUSG00000024747,ENSMUSG00000062480,ENSMUSG00000028011,ENSMUSG00000022853,ENSMUSG00000058022,ENSMUSG00000027597,ENSMUSG00000036427,ENSMUSG00000025745,ENSMUSG00000037542,ENSMUSG00000036892,ENSMUSG00000028692,ENSMUSG00000027261,ENSMUSG00000032047,ENSMUSG00000026170,ENSMUSG00000036880,ENSMUSG00000019883,ENSMUSG00000027809,ENSMUSG00000028186,…
GO:BF (Biological Function)	monocarboxylic acid metabolic process	GO:0032787	3.9e-14	13.4088	381	198	43	8625	ENSMUSG00000024158,ENSMUSG00000053279,ENSMUSG00000021751,ENSMUSG00000010025,ENSMUSG00000030869,ENSMUSG00000062480,ENSMUSG00000022853,ENSMUSG00000058022,ENSMUSG00000036427,ENSMUSG00000025745,ENSMUSG00000037542,ENSMUSG00000042248,ENSMUSG00000027195,ENSMUSG00000041237,ENSMUSG00000023019,ENSMUSG00000025153,ENSMUSG00000028692,ENSMUSG00000027261,ENSMUSG00000032047,ENSMUSG00000026170,ENSMUSG00000036880,…
GO:BF (Biological Function)	carboxylic acid catabolic process	GO:0046395	2.53e-12	11.5972	180	198	29	8625	ENSMUSG00000020051,ENSMUSG00000021751,ENSMUSG00000062480,ENSMUSG00000028011,ENSMUSG00000022853,ENSMUSG00000058022,ENSMUSG00000027597,ENSMUSG00000025745,ENSMUSG00000037542,ENSMUSG00000036892,ENSMUSG00000028692,ENSMUSG00000027261,ENSMUSG00000032047,ENSMUSG00000036880,ENSMUSG00000019883,ENSMUSG00000027809,ENSMUSG00000026385,ENSMUSG00000037798,ENSMUSG00000026003,ENSMUSG00000029695,ENSMUSG00000057228,…
GO:BF (Biological Function)	organic acid catabolic process	GO:0016054	2.53e-12	11.5972	180	198	29	8625	ENSMUSG00000020051,ENSMUSG00000021751,ENSMUSG00000062480,ENSMUSG00000028011,ENSMUSG00000022853,ENSMUSG00000058022,ENSMUSG00000027597,ENSMUSG00000025745,ENSMUSG00000037542,ENSMUSG00000036892,ENSMUSG00000028692,ENSMUSG00000027261,ENSMUSG00000032047,ENSMUSG00000036880,ENSMUSG00000019883,ENSMUSG00000027809,ENSMUSG00000026385,ENSMUSG00000037798,ENSMUSG00000026003,ENSMUSG00000029695,ENSMUSG00000057228,…
GO:BF (Biological Function)	fatty acid metabolic process	GO:0006631	7.56e-11	10.1213	253	198	32	8625	ENSMUSG00000021751,ENSMUSG00000010025,ENSMUSG00000030869,ENSMUSG00000062480,ENSMUSG00000022853,ENSMUSG00000058022,ENSMUSG00000025745,ENSMUSG00000042248,ENSMUSG00000027195,ENSMUSG00000025153,ENSMUSG00000027261,ENSMUSG00000032047,ENSMUSG00000036880,ENSMUSG00000033533,ENSMUSG00000019883,ENSMUSG00000027809,ENSMUSG00000026385,ENSMUSG00000028240,ENSMUSG00000022040,ENSMUSG00000067225,ENSMUSG00000054827,…
GO:BF (Biological Function)	sulfur compound metabolic process	GO:0006790	1.41e-09	8.85068	194	198	27	8625	ENSMUSG00000008540,ENSMUSG00000074768,ENSMUSG00000024158,ENSMUSG00000028603,ENSMUSG00000028011,ENSMUSG00000022853,ENSMUSG00000027597,ENSMUSG00000029273,ENSMUSG00000005803,ENSMUSG00000075706,ENSMUSG00000025153,ENSMUSG00000024359,ENSMUSG00000032047,ENSMUSG00000036880,ENSMUSG00000033533,ENSMUSG00000005683,ENSMUSG00000037798,ENSMUSG00000025991,ENSMUSG00000021048,ENSMUSG00000017950,ENSMUSG00000020664,…
GO:BF (Biological Function)	drug metabolic process	GO:0017144	5.28e-09	8.2776	332	198	34	8625	ENSMUSG00000074768,ENSMUSG00000020051,ENSMUSG00000053279,ENSMUSG00000024747,ENSMUSG00000075701,ENSMUSG00000010025,ENSMUSG00000028603,ENSMUSG00000028479,ENSMUSG00000027597,ENSMUSG00000037542,ENSMUSG00000042248,ENSMUSG00000005803,ENSMUSG00000041237,ENSMUSG00000027187,ENSMUSG00000022477,ENSMUSG00000028692,ENSMUSG00000027261,ENSMUSG00000032047,ENSMUSG00000040181,ENSMUSG00000026170,ENSMUSG00000067225,…
GO:BF (Biological Function)	monocarboxylic acid catabolic process	GO:0072329	2.48e-07	6.60574	97	198	18	8625	ENSMUSG00000021751,ENSMUSG00000062480,ENSMUSG00000022853,ENSMUSG00000058022,ENSMUSG00000025745,ENSMUSG00000028692,ENSMUSG00000027261,ENSMUSG00000032047,ENSMUSG00000036880,ENSMUSG00000019883,ENSMUSG00000027809,ENSMUSG00000026385,ENSMUSG00000026003,ENSMUSG00000027984,ENSMUSG00000003623,ENSMUSG00000026272,ENSMUSG00000020777,ENSMUSG00000024900
GO:BF (Biological Function)	lipid metabolic process	GO:0006629	3.33e-07	6.47705	747	198	49	8625	ENSMUSG00000078675,ENSMUSG00000053279,ENSMUSG00000021751,ENSMUSG00000010025,ENSMUSG00000028603,ENSMUSG00000030869,ENSMUSG00000062480,ENSMUSG00000022853,ENSMUSG00000058022,ENSMUSG00000029273,ENSMUSG00000025745,ENSMUSG00000037542,ENSMUSG00000042248,ENSMUSG00000027195,ENSMUSG00000027187,ENSMUSG00000023019,ENSMUSG00000025153,ENSMUSG00000069922,ENSMUSG00000038092,ENSMUSG00000027261,ENSMUSG00000032047,…
GO:BF (Biological Function)	fatty acid beta-oxidation	GO:0006635	1.49e-06	5.82697	58	198	14	8625	ENSMUSG00000021751,ENSMUSG00000062480,ENSMUSG00000022853,ENSMUSG00000025745,ENSMUSG00000032047,ENSMUSG00000036880,ENSMUSG00000019883,ENSMUSG00000027809,ENSMUSG00000026385,ENSMUSG00000026003,ENSMUSG00000027984,ENSMUSG00000003623,ENSMUSG00000020777,ENSMUSG00000024900
GO:BF (Biological Function)	fatty acid catabolic process	GO:0009062	1.79e-06	5.74705	82	198	16	8625	ENSMUSG00000021751,ENSMUSG00000062480,ENSMUSG00000022853,ENSMUSG00000058022,ENSMUSG00000025745,ENSMUSG00000027261,ENSMUSG00000032047,ENSMUSG00000036880,ENSMUSG00000019883,ENSMUSG00000027809,ENSMUSG00000026385,ENSMUSG00000026003,ENSMUSG00000027984,ENSMUSG00000003623,ENSMUSG00000020777,ENSMUSG00000024900
GO:BF (Biological Function)	cellular lipid metabolic process	GO:0044255	2.88e-06	5.541	582	198	41	8625	ENSMUSG00000053279,ENSMUSG00000021751,ENSMUSG00000010025,ENSMUSG00000030869,ENSMUSG00000062480,ENSMUSG00000022853,ENSMUSG00000058022,ENSMUSG00000025745,ENSMUSG00000037542,ENSMUSG00000042248,ENSMUSG00000027195,ENSMUSG00000027187,ENSMUSG00000023019,ENSMUSG00000025153,ENSMUSG00000027261,ENSMUSG00000032047,ENSMUSG00000036880,ENSMUSG00000033533,ENSMUSG00000019883,ENSMUSG00000027809,ENSMUSG00000026385,…
GO:BF (Biological Function)	fatty acid oxidation	GO:0019395	1.13e-05	4.94645	79	198	15	8625	ENSMUSG00000021751,ENSMUSG00000062480,ENSMUSG00000022853,ENSMUSG00000025745,ENSMUSG00000027261,ENSMUSG00000032047,ENSMUSG00000036880,ENSMUSG00000019883,ENSMUSG00000027809,ENSMUSG00000026385,ENSMUSG00000026003,ENSMUSG00000027984,ENSMUSG00000003623,ENSMUSG00000020777,ENSMUSG00000024900
GO:BF (Biological Function)	lipid oxidation	GO:0034440	1.36e-05	4.86503	80	198	15	8625	ENSMUSG00000021751,ENSMUSG00000062480,ENSMUSG00000022853,ENSMUSG00000025745,ENSMUSG00000027261,ENSMUSG00000032047,ENSMUSG00000036880,ENSMUSG00000019883,ENSMUSG00000027809,ENSMUSG00000026385,ENSMUSG00000026003,ENSMUSG00000027984,ENSMUSG00000003623,ENSMUSG00000020777,ENSMUSG00000024900
GO:BF (Biological Function)	cofactor metabolic process	GO:0051186	1.95e-05	4.71067	289	198	27	8625	ENSMUSG00000008540,ENSMUSG00000020051,ENSMUSG00000024158,ENSMUSG00000028603,ENSMUSG00000028011,ENSMUSG00000022853,ENSMUSG00000027597,ENSMUSG00000075706,ENSMUSG00000027187,ENSMUSG00000040466,ENSMUSG00000025153,ENSMUSG00000024359,ENSMUSG00000028692,ENSMUSG00000032047,ENSMUSG00000036880,ENSMUSG00000033533,ENSMUSG00000005683,ENSMUSG00000037798,ENSMUSG00000021048,ENSMUSG00000017950,ENSMUSG00000020664,…
GO:BF (Biological Function)	generation of precursor metabolites and energy	GO:0006091	3.55e-05	4.45009	276	198	26	8625	ENSMUSG00000078675,ENSMUSG00000026526,ENSMUSG00000046949,ENSMUSG00000025651,ENSMUSG00000071014,ENSMUSG00000021957,ENSMUSG00000036427,ENSMUSG00000041237,ENSMUSG00000027187,ENSMUSG00000023019,ENSMUSG00000021591,ENSMUSG00000022477,ENSMUSG00000032047,ENSMUSG00000025968,ENSMUSG00000027809,ENSMUSG00000005683,ENSMUSG00000021520,ENSMUSG00000020664,ENSMUSG00000029695,ENSMUSG00000021069,ENSMUSG00000003623,…
GO:BF (Biological Function)	cellular amino acid metabolic process	GO:0006520	3.58e-05	4.44561	198	198	22	8625	ENSMUSG00000074768,ENSMUSG00000020051,ENSMUSG00000024587,ENSMUSG00000028011,ENSMUSG00000027597,ENSMUSG00000037542,ENSMUSG00000036892,ENSMUSG00000032047,ENSMUSG00000037798,ENSMUSG00000020182,ENSMUSG00000025991,ENSMUSG00000021048,ENSMUSG00000017950,ENSMUSG00000029695,ENSMUSG00000057228,ENSMUSG00000023044,ENSMUSG00000019987,ENSMUSG00000026272,ENSMUSG00000026473,ENSMUSG00000033022,ENSMUSG00000033427,…
GO:BF (Biological Function)	alpha-amino acid metabolic process	GO:1901605	7.6e-05	4.11931	152	198	19	8625	ENSMUSG00000074768,ENSMUSG00000020051,ENSMUSG00000028011,ENSMUSG00000027597,ENSMUSG00000037542,ENSMUSG00000036892,ENSMUSG00000032047,ENSMUSG00000037798,ENSMUSG00000025991,ENSMUSG00000021048,ENSMUSG00000017950,ENSMUSG00000029695,ENSMUSG00000057228,ENSMUSG00000023044,ENSMUSG00000019987,ENSMUSG00000026272,ENSMUSG00000026473,ENSMUSG00000033022,ENSMUSG00000022751
GO:BF (Biological Function)	organic acid biosynthetic process	GO:0016053	8.97e-05	4.04741	189	198	21	8625	ENSMUSG00000074768,ENSMUSG00000020051,ENSMUSG00000053279,ENSMUSG00000030869,ENSMUSG00000037542,ENSMUSG00000027195,ENSMUSG00000041237,ENSMUSG00000025153,ENSMUSG00000028692,ENSMUSG00000026170,ENSMUSG00000033533,ENSMUSG00000028240,ENSMUSG00000025991,ENSMUSG00000021048,ENSMUSG00000017950,ENSMUSG00000023044,ENSMUSG00000026272,ENSMUSG00000026473,ENSMUSG00000033022,ENSMUSG00000033427,ENSMUSG00000071072
GO:BF (Biological Function)	coenzyme metabolic process	GO:0006732	0.000136265	3.86562	175	198	20	8625	ENSMUSG00000020051,ENSMUSG00000028603,ENSMUSG00000028011,ENSMUSG00000022853,ENSMUSG00000027597,ENSMUSG00000025153,ENSMUSG00000028692,ENSMUSG00000032047,ENSMUSG00000036880,ENSMUSG00000033533,ENSMUSG00000005683,ENSMUSG00000037798,ENSMUSG00000021048,ENSMUSG00000017950,ENSMUSG00000020664,ENSMUSG00000029695,ENSMUSG00000057228,ENSMUSG00000003623,ENSMUSG00000028452,ENSMUSG00000027875
GO:BF (Biological Function)	lipid catabolic process	GO:0016042	0.000144746	3.83939	194	198	21	8625	ENSMUSG00000021751,ENSMUSG00000062480,ENSMUSG00000022853,ENSMUSG00000058022,ENSMUSG00000025745,ENSMUSG00000069922,ENSMUSG00000027261,ENSMUSG00000032047,ENSMUSG00000026170,ENSMUSG00000036880,ENSMUSG00000019883,ENSMUSG00000027809,ENSMUSG00000026385,ENSMUSG00000028240,ENSMUSG00000025991,ENSMUSG00000026003,ENSMUSG00000027984,ENSMUSG00000005681,ENSMUSG00000003623,ENSMUSG00000020777,ENSMUSG00000024900
GO:BF (Biological Function)	cellular lipid catabolic process	GO:0044242	0.000166923	3.77748	142	198	18	8625	ENSMUSG00000021751,ENSMUSG00000062480,ENSMUSG00000022853,ENSMUSG00000058022,ENSMUSG00000025745,ENSMUSG00000027261,ENSMUSG00000032047,ENSMUSG00000036880,ENSMUSG00000019883,ENSMUSG00000027809,ENSMUSG00000026385,ENSMUSG00000025991,ENSMUSG00000026003,ENSMUSG00000027984,ENSMUSG00000005681,ENSMUSG00000003623,ENSMUSG00000020777,ENSMUSG00000024900
GO:BF (Biological Function)	purine-containing compound metabolic process	GO:0072521	0.000187061	3.72802	256	198	24	8625	ENSMUSG00000028603,ENSMUSG00000028011,ENSMUSG00000022853,ENSMUSG00000027597,ENSMUSG00000036427,ENSMUSG00000041237,ENSMUSG00000023019,ENSMUSG00000025153,ENSMUSG00000032047,ENSMUSG00000036880,ENSMUSG00000033533,ENSMUSG00000028186,ENSMUSG00000005683,ENSMUSG00000061808,ENSMUSG00000021048,ENSMUSG00000017950,ENSMUSG00000020664,ENSMUSG00000029695,ENSMUSG00000057228,ENSMUSG00000003623,ENSMUSG00000028452,…
GO:BF (Biological Function)	small molecule biosynthetic process	GO:0044283	0.000208539	3.68081	390	198	30	8625	ENSMUSG00000074768,ENSMUSG00000078675,ENSMUSG00000020051,ENSMUSG00000053279,ENSMUSG00000028603,ENSMUSG00000030869,ENSMUSG00000036427,ENSMUSG00000037542,ENSMUSG00000027195,ENSMUSG00000041237,ENSMUSG00000023019,ENSMUSG00000025153,ENSMUSG00000024740,ENSMUSG00000028692,ENSMUSG00000032047,ENSMUSG00000026170,ENSMUSG00000033533,ENSMUSG00000028240,ENSMUSG00000025991,ENSMUSG00000021048,ENSMUSG00000017950,…
GO:BF (Biological Function)	acyl-CoA metabolic process	GO:0006637	0.000249746	3.6025	70	198	13	8625	ENSMUSG00000028603,ENSMUSG00000028011,ENSMUSG00000022853,ENSMUSG00000025153,ENSMUSG00000032047,ENSMUSG00000036880,ENSMUSG00000033533,ENSMUSG00000005683,ENSMUSG00000017950,ENSMUSG00000020664,ENSMUSG00000029695,ENSMUSG00000057228,ENSMUSG00000027875
GO:BF (Biological Function)	thioester metabolic process	GO:0035383	0.000249746	3.6025	70	198	13	8625	ENSMUSG00000028603,ENSMUSG00000028011,ENSMUSG00000022853,ENSMUSG00000025153,ENSMUSG00000032047,ENSMUSG00000036880,ENSMUSG00000033533,ENSMUSG00000005683,ENSMUSG00000017950,ENSMUSG00000020664,ENSMUSG00000029695,ENSMUSG00000057228,ENSMUSG00000027875
GO:BF (Biological Function)	purine nucleoside bisphosphate metabolic process	GO:0034032	0.00032377	3.48976	85	198	14	8625	ENSMUSG00000028603,ENSMUSG00000028011,ENSMUSG00000022853,ENSMUSG00000025153,ENSMUSG00000032047,ENSMUSG00000036880,ENSMUSG00000033533,ENSMUSG00000005683,ENSMUSG00000017950,ENSMUSG00000020664,ENSMUSG00000029695,ENSMUSG00000057228,ENSMUSG00000003623,ENSMUSG00000027875
GO:BF (Biological Function)	ribonucleoside bisphosphate metabolic process	GO:0033875	0.00032377	3.48976	85	198	14	8625	ENSMUSG00000028603,ENSMUSG00000028011,ENSMUSG00000022853,ENSMUSG00000025153,ENSMUSG00000032047,ENSMUSG00000036880,ENSMUSG00000033533,ENSMUSG00000005683,ENSMUSG00000017950,ENSMUSG00000020664,ENSMUSG00000029695,ENSMUSG00000057228,ENSMUSG00000003623,ENSMUSG00000027875
GO:BF (Biological Function)	nucleoside bisphosphate metabolic process	GO:0033865	0.00032377	3.48976	85	198	14	8625	ENSMUSG00000028603,ENSMUSG00000028011,ENSMUSG00000022853,ENSMUSG00000025153,ENSMUSG00000032047,ENSMUSG00000036880,ENSMUSG00000033533,ENSMUSG00000005683,ENSMUSG00000017950,ENSMUSG00000020664,ENSMUSG00000029695,ENSMUSG00000057228,ENSMUSG00000003623,ENSMUSG00000027875
GO:BF (Biological Function)	alpha-amino acid catabolic process	GO:1901606	0.000358354	3.44569	72	198	13	8625	ENSMUSG00000020051,ENSMUSG00000028011,ENSMUSG00000027597,ENSMUSG00000037542,ENSMUSG00000036892,ENSMUSG00000032047,ENSMUSG00000037798,ENSMUSG00000029695,ENSMUSG00000057228,ENSMUSG00000023044,ENSMUSG00000019987,ENSMUSG00000026272,ENSMUSG00000033022
GO:BF (Biological Function)	cellular amide metabolic process	GO:0043603	0.000406213	3.39125	658	198	40	8625	ENSMUSG00000008540,ENSMUSG00000024158,ENSMUSG00000022370,ENSMUSG00000012848,ENSMUSG00000060636,ENSMUSG00000034211,ENSMUSG00000028603,ENSMUSG00000024587,ENSMUSG00000028011,ENSMUSG00000022853,ENSMUSG00000075706,ENSMUSG00000031320,ENSMUSG00000025153,ENSMUSG00000073838,ENSMUSG00000058546,ENSMUSG00000032047,ENSMUSG00000036880,ENSMUSG00000033533,ENSMUSG00000005683,ENSMUSG00000025991,ENSMUSG00000021048,…
GO:BF (Biological Function)	acetyl-CoA metabolic process	GO:0006084	0.000497104	3.30355	29	198	9	8625	ENSMUSG00000028011,ENSMUSG00000025153,ENSMUSG00000032047,ENSMUSG00000036880,ENSMUSG00000005683,ENSMUSG00000020664,ENSMUSG00000029695,ENSMUSG00000057228,ENSMUSG00000027875
GO:BF (Biological Function)	catabolic process	GO:0009056	0.000770216	3.11339	1476	198	66	8625	ENSMUSG00000074768,ENSMUSG00000020051,ENSMUSG00000024158,ENSMUSG00000038845,ENSMUSG00000021751,ENSMUSG00000024747,ENSMUSG00000068749,ENSMUSG00000075701,ENSMUSG00000062480,ENSMUSG00000032050,ENSMUSG00000028011,ENSMUSG00000022853,ENSMUSG00000058022,ENSMUSG00000027597,ENSMUSG00000036427,ENSMUSG00000025745,ENSMUSG00000037542,ENSMUSG00000042248,ENSMUSG00000041237,ENSMUSG00000014769,ENSMUSG00000027187,…
GO:BF (Biological Function)	ribose phosphate metabolic process	GO:0019693	0.000974711	3.01112	236	198	22	8625	ENSMUSG00000028603,ENSMUSG00000028011,ENSMUSG00000022853,ENSMUSG00000021957,ENSMUSG00000036427,ENSMUSG00000041237,ENSMUSG00000023019,ENSMUSG00000025153,ENSMUSG00000032047,ENSMUSG00000036880,ENSMUSG00000033533,ENSMUSG00000005683,ENSMUSG00000017950,ENSMUSG00000020664,ENSMUSG00000029695,ENSMUSG00000057228,ENSMUSG00000021069,ENSMUSG00000003623,ENSMUSG00000028452,ENSMUSG00000007815,ENSMUSG00000025393,…
GO:BF (Biological Function)	cellular amino acid catabolic process	GO:0009063	0.000987496	3.00546	78	198	13	8625	ENSMUSG00000020051,ENSMUSG00000028011,ENSMUSG00000027597,ENSMUSG00000037542,ENSMUSG00000036892,ENSMUSG00000032047,ENSMUSG00000037798,ENSMUSG00000029695,ENSMUSG00000057228,ENSMUSG00000023044,ENSMUSG00000019987,ENSMUSG00000026272,ENSMUSG00000033022
GO:BF (Biological Function)	organic substance catabolic process	GO:1901575	0.00110669	2.95597	1225	198	58	8625	ENSMUSG00000074768,ENSMUSG00000020051,ENSMUSG00000024158,ENSMUSG00000038845,ENSMUSG00000021751,ENSMUSG00000024747,ENSMUSG00000068749,ENSMUSG00000075701,ENSMUSG00000062480,ENSMUSG00000032050,ENSMUSG00000028011,ENSMUSG00000022853,ENSMUSG00000058022,ENSMUSG00000027597,ENSMUSG00000036427,ENSMUSG00000025745,ENSMUSG00000037542,ENSMUSG00000041237,ENSMUSG00000014769,ENSMUSG00000007891,ENSMUSG00000023019,…
GO:BF (Biological Function)	nucleobase-containing small molecule metabolic process	GO:0055086	0.00144225	2.84096	352	198	27	8625	ENSMUSG00000028603,ENSMUSG00000028479,ENSMUSG00000028011,ENSMUSG00000022853,ENSMUSG00000027597,ENSMUSG00000036427,ENSMUSG00000041237,ENSMUSG00000023019,ENSMUSG00000025153,ENSMUSG00000032047,ENSMUSG00000036880,ENSMUSG00000033533,ENSMUSG00000028186,ENSMUSG00000005683,ENSMUSG00000061808,ENSMUSG00000025991,ENSMUSG00000021048,ENSMUSG00000017950,ENSMUSG00000020664,ENSMUSG00000029695,ENSMUSG00000057228,…
GO:BF (Biological Function)	lipid modification	GO:0030258	0.00167564	2.77582	164	198	18	8625	ENSMUSG00000021751,ENSMUSG00000062480,ENSMUSG00000022853,ENSMUSG00000025745,ENSMUSG00000027261,ENSMUSG00000032047,ENSMUSG00000036880,ENSMUSG00000019883,ENSMUSG00000027809,ENSMUSG00000026385,ENSMUSG00000022040,ENSMUSG00000026003,ENSMUSG00000027984,ENSMUSG00000005681,ENSMUSG00000003623,ENSMUSG00000020777,ENSMUSG00000028517,ENSMUSG00000024900
GO:BF (Biological Function)	carboxylic acid biosynthetic process	GO:0046394	0.00241941	2.61629	187	198	19	8625	ENSMUSG00000074768,ENSMUSG00000020051,ENSMUSG00000053279,ENSMUSG00000030869,ENSMUSG00000037542,ENSMUSG00000027195,ENSMUSG00000041237,ENSMUSG00000025153,ENSMUSG00000028692,ENSMUSG00000026170,ENSMUSG00000033533,ENSMUSG00000028240,ENSMUSG00000025991,ENSMUSG00000021048,ENSMUSG00000017950,ENSMUSG00000026272,ENSMUSG00000026473,ENSMUSG00000033427,ENSMUSG00000071072
GO:BF (Biological Function)	purine nucleotide metabolic process	GO:0006163	0.00278741	2.5548	229	198	21	8625	ENSMUSG00000028603,ENSMUSG00000028011,ENSMUSG00000022853,ENSMUSG00000036427,ENSMUSG00000041237,ENSMUSG00000023019,ENSMUSG00000025153,ENSMUSG00000032047,ENSMUSG00000036880,ENSMUSG00000033533,ENSMUSG00000005683,ENSMUSG00000021048,ENSMUSG00000017950,ENSMUSG00000020664,ENSMUSG00000029695,ENSMUSG00000057228,ENSMUSG00000003623,ENSMUSG00000028452,ENSMUSG00000007815,ENSMUSG00000025393,ENSMUSG00000027875
GO:BF (Biological Function)	response to drug	GO:0042493	0.00323838	2.48967	570	198	35	8625	ENSMUSG00000008540,ENSMUSG00000038845,ENSMUSG00000053279,ENSMUSG00000016319,ENSMUSG00000030236,ENSMUSG00000028011,ENSMUSG00000022174,ENSMUSG00000036427,ENSMUSG00000025745,ENSMUSG00000042248,ENSMUSG00000041237,ENSMUSG00000027187,ENSMUSG00000073838,ENSMUSG00000021591,ENSMUSG00000049152,ENSMUSG00000029580,ENSMUSG00000067225,ENSMUSG00000020152,ENSMUSG00000021999,ENSMUSG00000020182,ENSMUSG00000025991,…
GO:BF (Biological Function)	response to chemical	GO:0042221	0.00357072	2.44724	2067	198	81	8625	ENSMUSG00000008540,ENSMUSG00000078675,ENSMUSG00000038845,ENSMUSG00000053279,ENSMUSG00000073555,ENSMUSG00000016319,ENSMUSG00000075701,ENSMUSG00000010025,ENSMUSG00000054263,ENSMUSG00000030236,ENSMUSG00000025651,ENSMUSG00000032050,ENSMUSG00000041698,ENSMUSG00000028011,ENSMUSG00000058022,ENSMUSG00000027597,ENSMUSG00000022174,ENSMUSG00000026878,ENSMUSG00000036427,ENSMUSG00000025745,ENSMUSG00000042248,…
GO:BF (Biological Function)	purine ribonucleotide metabolic process	GO:0009150	0.00542178	2.26586	217	198	20	8625	ENSMUSG00000028603,ENSMUSG00000028011,ENSMUSG00000022853,ENSMUSG00000036427,ENSMUSG00000041237,ENSMUSG00000023019,ENSMUSG00000025153,ENSMUSG00000032047,ENSMUSG00000036880,ENSMUSG00000033533,ENSMUSG00000005683,ENSMUSG00000017950,ENSMUSG00000020664,ENSMUSG00000029695,ENSMUSG00000057228,ENSMUSG00000003623,ENSMUSG00000028452,ENSMUSG00000007815,ENSMUSG00000025393,ENSMUSG00000027875
GO:BF (Biological Function)	cellular catabolic process	GO:0044248	0.00601766	2.22057	1317	198	59	8625	ENSMUSG00000074768,ENSMUSG00000020051,ENSMUSG00000024158,ENSMUSG00000021751,ENSMUSG00000024747,ENSMUSG00000068749,ENSMUSG00000075701,ENSMUSG00000062480,ENSMUSG00000032050,ENSMUSG00000028011,ENSMUSG00000022853,ENSMUSG00000058022,ENSMUSG00000027597,ENSMUSG00000036427,ENSMUSG00000025745,ENSMUSG00000037542,ENSMUSG00000042248,ENSMUSG00000014769,ENSMUSG00000027187,ENSMUSG00000007891,ENSMUSG00000023019,…
GO:BF (Biological Function)	ribonucleotide metabolic process	GO:0009259	0.0122186	1.91298	228	198	20	8625	ENSMUSG00000028603,ENSMUSG00000028011,ENSMUSG00000022853,ENSMUSG00000036427,ENSMUSG00000041237,ENSMUSG00000023019,ENSMUSG00000025153,ENSMUSG00000032047,ENSMUSG00000036880,ENSMUSG00000033533,ENSMUSG00000005683,ENSMUSG00000017950,ENSMUSG00000020664,ENSMUSG00000029695,ENSMUSG00000057228,ENSMUSG00000003623,ENSMUSG00000028452,ENSMUSG00000007815,ENSMUSG00000025393,ENSMUSG00000027875
GO:BF (Biological Function)	cellular respiration	GO:0045333	0.0312223	1.50553	121	198	14	8625	ENSMUSG00000078675,ENSMUSG00000026526,ENSMUSG00000025651,ENSMUSG00000071014,ENSMUSG00000027187,ENSMUSG00000023019,ENSMUSG00000022477,ENSMUSG00000025968,ENSMUSG00000027809,ENSMUSG00000005683,ENSMUSG00000021520,ENSMUSG00000020664,ENSMUSG00000028452,ENSMUSG00000021577
GO:CC (Cellular Compartment)	mitochondrion	GO:0005739	1.04e-10	9.98416	1247	198	73	8625	ENSMUSG00000008540,ENSMUSG00000026526,ENSMUSG00000046598,ENSMUSG00000038845,ENSMUSG00000022370,ENSMUSG00000060636,ENSMUSG00000028648,ENSMUSG00000034211,ENSMUSG00000016319,ENSMUSG00000010025,ENSMUSG00000028603,ENSMUSG00000030869,ENSMUSG00000025651,ENSMUSG00000062480,ENSMUSG00000024587,ENSMUSG00000071014,ENSMUSG00000022853,ENSMUSG00000021290,ENSMUSG00000025745,ENSMUSG00000005803,ENSMUSG00000075706,…
GO:CC (Cellular Compartment)	mitochondrial inner membrane	GO:0005743	3.18e-09	8.49822	307	198	33	8625	ENSMUSG00000008540,ENSMUSG00000046598,ENSMUSG00000038845,ENSMUSG00000028648,ENSMUSG00000016319,ENSMUSG00000010025,ENSMUSG00000030869,ENSMUSG00000025651,ENSMUSG00000071014,ENSMUSG00000021290,ENSMUSG00000025745,ENSMUSG00000005803,ENSMUSG00000075706,ENSMUSG00000073838,ENSMUSG00000038092,ENSMUSG00000036892,ENSMUSG00000032047,ENSMUSG00000073481,ENSMUSG00000025968,ENSMUSG00000026170,ENSMUSG00000036880,…
GO:CC (Cellular Compartment)	mitochondrial envelope	GO:0005740	2.65e-08	7.57716	458	198	39	8625	ENSMUSG00000008540,ENSMUSG00000046598,ENSMUSG00000038845,ENSMUSG00000028648,ENSMUSG00000016319,ENSMUSG00000010025,ENSMUSG00000028603,ENSMUSG00000030869,ENSMUSG00000025651,ENSMUSG00000071014,ENSMUSG00000021290,ENSMUSG00000025745,ENSMUSG00000005803,ENSMUSG00000075706,ENSMUSG00000027187,ENSMUSG00000039428,ENSMUSG00000073838,ENSMUSG00000021591,ENSMUSG00000038092,ENSMUSG00000036892,ENSMUSG00000032047,…
GO:CC (Cellular Compartment)	mitochondrial part	GO:0044429	2.88e-08	7.54095	649	198	47	8625	ENSMUSG00000008540,ENSMUSG00000046598,ENSMUSG00000038845,ENSMUSG00000022370,ENSMUSG00000028648,ENSMUSG00000034211,ENSMUSG00000016319,ENSMUSG00000010025,ENSMUSG00000028603,ENSMUSG00000030869,ENSMUSG00000025651,ENSMUSG00000071014,ENSMUSG00000021290,ENSMUSG00000025745,ENSMUSG00000005803,ENSMUSG00000075706,ENSMUSG00000027187,ENSMUSG00000039428,ENSMUSG00000024359,ENSMUSG00000073838,ENSMUSG00000021591,…
GO:CC (Cellular Compartment)	organelle inner membrane	GO:0019866	5.37e-08	7.27034	339	198	33	8625	ENSMUSG00000008540,ENSMUSG00000046598,ENSMUSG00000038845,ENSMUSG00000028648,ENSMUSG00000016319,ENSMUSG00000010025,ENSMUSG00000030869,ENSMUSG00000025651,ENSMUSG00000071014,ENSMUSG00000021290,ENSMUSG00000025745,ENSMUSG00000005803,ENSMUSG00000075706,ENSMUSG00000073838,ENSMUSG00000038092,ENSMUSG00000036892,ENSMUSG00000032047,ENSMUSG00000073481,ENSMUSG00000025968,ENSMUSG00000026170,ENSMUSG00000036880,…
GO:CC (Cellular Compartment)	mitochondrial membrane	GO:0031966	5.91e-08	7.2285	425	198	37	8625	ENSMUSG00000008540,ENSMUSG00000046598,ENSMUSG00000038845,ENSMUSG00000028648,ENSMUSG00000016319,ENSMUSG00000010025,ENSMUSG00000028603,ENSMUSG00000030869,ENSMUSG00000025651,ENSMUSG00000071014,ENSMUSG00000021290,ENSMUSG00000025745,ENSMUSG00000005803,ENSMUSG00000075706,ENSMUSG00000039428,ENSMUSG00000073838,ENSMUSG00000038092,ENSMUSG00000036892,ENSMUSG00000032047,ENSMUSG00000073481,ENSMUSG00000025968,…
GO:CC (Cellular Compartment)	myelin sheath	GO:0043209	1.25e-05	4.90433	137	198	19	8625	ENSMUSG00000038845,ENSMUSG00000016319,ENSMUSG00000025651,ENSMUSG00000032050,ENSMUSG00000021957,ENSMUSG00000036427,ENSMUSG00000024359,ENSMUSG00000073838,ENSMUSG00000022477,ENSMUSG00000025968,ENSMUSG00000029580,ENSMUSG00000068039,ENSMUSG00000022234,ENSMUSG00000020664,ENSMUSG00000028452,ENSMUSG00000021577,ENSMUSG00000006024,ENSMUSG00000025393,ENSMUSG00000026473
GO:CC (Cellular Compartment)	cytoplasmic part	GO:0044444	1.5e-05	4.82347	4893	198	154	8625	ENSMUSG00000008540,ENSMUSG00000074768,ENSMUSG00000042682,ENSMUSG00000078675,ENSMUSG00000026526,ENSMUSG00000046598,ENSMUSG00000038845,ENSMUSG00000022370,ENSMUSG00000053279,ENSMUSG00000073555,ENSMUSG00000012848,ENSMUSG00000060636,ENSMUSG00000021751,ENSMUSG00000068749,ENSMUSG00000028648,ENSMUSG00000034211,ENSMUSG00000016319,ENSMUSG00000075701,ENSMUSG00000046949,ENSMUSG00000010025,ENSMUSG00000028603,…
GO:CC (Cellular Compartment)	peroxisome	GO:0005777	0.000290289	3.53717	114	198	16	8625	ENSMUSG00000008540,ENSMUSG00000021751,ENSMUSG00000010025,ENSMUSG00000028603,ENSMUSG00000022853,ENSMUSG00000021957,ENSMUSG00000027187,ENSMUSG00000039428,ENSMUSG00000027261,ENSMUSG00000073481,ENSMUSG00000028186,ENSMUSG00000022040,ENSMUSG00000022323,ENSMUSG00000003623,ENSMUSG00000026272,ENSMUSG00000020777
GO:CC (Cellular Compartment)	microbody	GO:0042579	0.000290289	3.53717	114	198	16	8625	ENSMUSG00000008540,ENSMUSG00000021751,ENSMUSG00000010025,ENSMUSG00000028603,ENSMUSG00000022853,ENSMUSG00000021957,ENSMUSG00000027187,ENSMUSG00000039428,ENSMUSG00000027261,ENSMUSG00000073481,ENSMUSG00000028186,ENSMUSG00000022040,ENSMUSG00000022323,ENSMUSG00000003623,ENSMUSG00000026272,ENSMUSG00000020777
GO:CC (Cellular Compartment)	envelope	GO:0031975	0.000491615	3.30837	746	198	43	8625	ENSMUSG00000008540,ENSMUSG00000046598,ENSMUSG00000038845,ENSMUSG00000028648,ENSMUSG00000016319,ENSMUSG00000010025,ENSMUSG00000028603,ENSMUSG00000030869,ENSMUSG00000025651,ENSMUSG00000071014,ENSMUSG00000021290,ENSMUSG00000025745,ENSMUSG00000005803,ENSMUSG00000075706,ENSMUSG00000027187,ENSMUSG00000039428,ENSMUSG00000073838,ENSMUSG00000021591,ENSMUSG00000038092,ENSMUSG00000036892,ENSMUSG00000032047,…
GO:CC (Cellular Compartment)	organelle envelope	GO:0031967	0.000491615	3.30837	746	198	43	8625	ENSMUSG00000008540,ENSMUSG00000046598,ENSMUSG00000038845,ENSMUSG00000028648,ENSMUSG00000016319,ENSMUSG00000010025,ENSMUSG00000028603,ENSMUSG00000030869,ENSMUSG00000025651,ENSMUSG00000071014,ENSMUSG00000021290,ENSMUSG00000025745,ENSMUSG00000005803,ENSMUSG00000075706,ENSMUSG00000027187,ENSMUSG00000039428,ENSMUSG00000073838,ENSMUSG00000021591,ENSMUSG00000038092,ENSMUSG00000036892,ENSMUSG00000032047,…
GO:CC (Cellular Compartment)	cytoplasm	GO:0005737	0.00207637	2.6827	5873	198	168	8625	ENSMUSG00000008540,ENSMUSG00000074768,ENSMUSG00000042682,ENSMUSG00000078675,ENSMUSG00000026526,ENSMUSG00000046598,ENSMUSG00000038845,ENSMUSG00000022370,ENSMUSG00000053279,ENSMUSG00000075705,ENSMUSG00000073555,ENSMUSG00000012848,ENSMUSG00000060636,ENSMUSG00000021751,ENSMUSG00000024747,ENSMUSG00000068749,ENSMUSG00000028648,ENSMUSG00000034211,ENSMUSG00000016319,ENSMUSG00000075701,ENSMUSG00000046949,…
GO:CC (Cellular Compartment)	oxidoreductase complex	GO:1990204	0.0232711	1.63318	85	198	12	8625	ENSMUSG00000028648,ENSMUSG00000030869,ENSMUSG00000025651,ENSMUSG00000071014,ENSMUSG00000023019,ENSMUSG00000025968,ENSMUSG00000027809,ENSMUSG00000021520,ENSMUSG00000002416,ENSMUSG00000020664,ENSMUSG00000031059,ENSMUSG00000021577
GO:CC (Cellular Compartment)	mitochondrial matrix	GO:0005759	0.0352238	1.45316	266	198	21	8625	ENSMUSG00000046598,ENSMUSG00000022370,ENSMUSG00000034211,ENSMUSG00000016319,ENSMUSG00000030869,ENSMUSG00000025745,ENSMUSG00000024359,ENSMUSG00000073838,ENSMUSG00000032047,ENSMUSG00000036880,ENSMUSG00000033533,ENSMUSG00000027809,ENSMUSG00000005683,ENSMUSG00000025991,ENSMUSG00000022323,ENSMUSG00000026003,ENSMUSG00000020664,ENSMUSG00000027984,ENSMUSG00000026272,ENSMUSG00000025393,ENSMUSG00000027875
